# Supplementary material for: CtBP Promoted P4HB Mediates SLC7A11 Maturation to Confer Ferroptosis Resistance in Triple-Negative Breast Cancer
Source: Research Square preprint supplement (doi:10.21203/rs.3.rs-8199205/v1), 2025-12-04
Supplement: Supplementary file 1 [file 379abbfc6dd2975fb0c5d7c1.xlsx]

## Sheet: 468 KD-CtBP vs CTRL 
Geneid	external_gene_name	Length	chromosome_name	start_position	end_position	description	SICTBP_468_1	SICTBP_468_3	SINC_468_1	SINC_468_3
ENSG00000000003	TSPAN6	4530	X	100627108	100639991	tetraspanin 6 [Source:HGNC Symbol;Acc:HGNC:11858]	1924	2354	2141	1881
ENSG00000000005	TNMD	1476	X	100584936	100599885	tenomodulin [Source:HGNC Symbol;Acc:HGNC:17757]	3	6	1	0
ENSG00000000419	DPM1	9276	20	50934867	50959140	dolichyl-phosphate mannosyltransferase subunit 1, catalytic [Source:HGNC Symbol;Acc:HGNC:3005]	1622	2159	2091	1967
ENSG00000000457	SCYL3	6883	1	169849631	169894267	SCY1 like pseudokinase 3 [Source:HGNC Symbol;Acc:HGNC:19285]	752	657	909	834
ENSG00000000460	C1orf112	5970	1	169662007	169854080	chromosome 1 open reading frame 112 [Source:HGNC Symbol;Acc:HGNC:25565]	1124	1305	1270	1256
ENSG00000000938	FGR	3382	1	27612064	27635185	FGR proto-oncogene, Src family tyrosine kinase [Source:HGNC Symbol;Acc:HGNC:3697]	2	0	0	0
ENSG00000000971	CFH	15284	1	196651754	196752476	complement factor H [Source:HGNC Symbol;Acc:HGNC:4883]	0	0	1	0
ENSG00000001036	FUCA2	2822	6	143494812	143511720	alpha-L-fucosidase 2 [Source:HGNC Symbol;Acc:HGNC:4008]	2212	2178	2157	2233
ENSG00000001084	GCLC	8618	6	53497341	53616970	glutamate-cysteine ligase catalytic subunit [Source:HGNC Symbol;Acc:HGNC:4311]	3678	4001	6099	6048
ENSG00000001167	NFYA	6209	6	41072974	41102403	nuclear transcription factor Y subunit alpha [Source:HGNC Symbol;Acc:HGNC:7804]	1048	1242	1169	1179
ENSG00000001460	STPG1	8511	1	24356999	24416934	sperm tail PG-rich repeat containing 1 [Source:HGNC Symbol;Acc:HGNC:28070]	639	643	451	437
ENSG00000001461	NIPAL3	9396	1	24415802	24472976	NIPA like domain containing 3 [Source:HGNC Symbol;Acc:HGNC:25233]	2382	2001	2251	2402
ENSG00000001497	LAS1L	12555	X	65438549	65534810	LAS1 like ribosome biogenesis factor [Source:HGNC Symbol;Acc:HGNC:25726]	3597	3244	3350	3253
ENSG00000001561	ENPP4	4644	6	46129989	46146688	ectonucleotide pyrophosphatase/phosphodiesterase 4 [Source:HGNC Symbol;Acc:HGNC:3359]	1248	1483	1813	1655
ENSG00000001617	SEMA3F	4826	3	50155045	50189075	semaphorin 3F [Source:HGNC Symbol;Acc:HGNC:10728]	6010	5830	6316	6131
ENSG00000001629	ANKIB1	7389	7	92245974	92401383	ankyrin repeat and IBR domain containing 1 [Source:HGNC Symbol;Acc:HGNC:22215]	2265	2143	4031	3723
ENSG00000001630	CYP51A1	4171	7	92084987	92134803	cytochrome P450 family 51 subfamily A member 1 [Source:HGNC Symbol;Acc:HGNC:2649]	254	274	186	257
ENSG00000001631	KRIT1	21110	7	92197498	92246166	KRIT1 ankyrin repeat containing [Source:HGNC Symbol;Acc:HGNC:1573]	102	140	291	252
ENSG00000002016	RAD52	4503	12	911736	990053	RAD52 homolog, DNA repair protein [Source:HGNC Symbol;Acc:HGNC:9824]	265	234	224	262
ENSG00000002079	MYH16	6307	7	99238829	99311130	myosin heavy chain 16 pseudogene [Source:HGNC Symbol;Acc:HGNC:31038]	24	3	10	11
ENSG00000002330	BAD	1708	11	64269830	64284704	BCL2 associated agonist of cell death [Source:HGNC Symbol;Acc:HGNC:936]	487	682	624	560
ENSG00000002549	LAP3	3779	4	17577198	17607972	leucine aminopeptidase 3 [Source:HGNC Symbol;Acc:HGNC:18449]	2292	2326	2273	2124
ENSG00000002586	CD99	4858	X	2691187	2741309	CD99 molecule (Xg blood group) [Source:HGNC Symbol;Acc:HGNC:7082]	2865	3773	2309	2193
ENSG00000002587	HS3ST1	7435	4	11393150	11429564	heparan sulfate-glucosamine 3-sulfotransferase 1 [Source:HGNC Symbol;Acc:HGNC:5194]	176	131	127	135
ENSG00000002745	WNT16	3264	7	121325367	121341104	Wnt family member 16 [Source:HGNC Symbol;Acc:HGNC:16267]	0	0	0	1
ENSG00000002746	HECW1	13935	7	43112629	43566001	HECT, C2 and WW domain containing E3 ubiquitin protein ligase 1 [Source:HGNC Symbol;Acc:HGNC:22195]	1	1	0	0
ENSG00000002822	MAD1L1	6955	7	1815793	2233243	mitotic arrest deficient 1 like 1 [Source:HGNC Symbol;Acc:HGNC:6762]	8	13	9	9
ENSG00000002834	LASP1	7061	17	38869859	38921770	LIM and SH3 protein 1 [Source:HGNC Symbol;Acc:HGNC:6513]	12669	11415	11144	11808
ENSG00000002919	SNX11	4133	17	48103357	48123601	sorting nexin 11 [Source:HGNC Symbol;Acc:HGNC:14975]	511	543	700	685
ENSG00000003056	M6PR	3585	12	8940361	8949761	mannose-6-phosphate receptor, cation dependent [Source:HGNC Symbol;Acc:HGNC:6752]	1649	1759	1861	1756
ENSG00000003096	KLHL13	6928	X	117897813	118117340	kelch like family member 13 [Source:HGNC Symbol;Acc:HGNC:22931]	23	12	2	8
ENSG00000003137	CYP26B1	4839	2	72129238	72147862	cytochrome P450 family 26 subfamily B member 1 [Source:HGNC Symbol;Acc:HGNC:20581]	734	786	1110	1034
ENSG00000003147	ICA1	4883	7	8113184	8262687	islet cell autoantigen 1 [Source:HGNC Symbol;Acc:HGNC:5343]	1085	1165	1504	1417
ENSG00000003249	DBNDD1	4462	16	90004871	90019890	dysbindin domain containing 1 [Source:HGNC Symbol;Acc:HGNC:28455]	2309	2494	2141	1681
ENSG00000003393	ALS2	33513	2	201700267	201782112	alsin Rho guanine nucleotide exchange factor ALS2 [Source:HGNC Symbol;Acc:HGNC:443]	655	696	897	885
ENSG00000003400	CASP10	8920	2	201182872	201229428	caspase 10 [Source:HGNC Symbol;Acc:HGNC:1500]	1655	1496	1291	1363
ENSG00000003402	CFLAR	22478	2	201116154	201176687	CASP8 and FADD like apoptosis regulator [Source:HGNC Symbol;Acc:HGNC:1876]	2010	2120	2138	2056
ENSG00000003436	TFPI	11714	2	187464230	187565760	tissue factor pathway inhibitor [Source:HGNC Symbol;Acc:HGNC:11760]	3117	3726	2211	2259
ENSG00000003509	NDUFAF7	3651	2	37231631	37253403	NADH:ubiquinone oxidoreductase complex assembly factor 7 [Source:HGNC Symbol;Acc:HGNC:28816]	468	560	544	564
ENSG00000003756	RBM5	10357	3	50088919	50119021	RNA binding motif protein 5 [Source:HGNC Symbol;Acc:HGNC:9902]	1225	1294	1234	1403
ENSG00000003987	MTMR7	6928	8	17296794	17413528	myotubularin related protein 7 [Source:HGNC Symbol;Acc:HGNC:7454]	38	37	63	78
ENSG00000003989	SLC7A2	7905	8	17497088	17570573	solute carrier family 7 member 2 [Source:HGNC Symbol;Acc:HGNC:11060]	48	29	18	39
ENSG00000004059	ARF5	1825	7	127588386	127591700	ADP ribosylation factor 5 [Source:HGNC Symbol;Acc:HGNC:658]	2571	2622	2896	2519
ENSG00000004139	SARM1	11105	17	28364356	28404049	sterile alpha and TIR motif containing 1 [Source:HGNC Symbol;Acc:HGNC:17074]	233	211	195	225
ENSG00000004142	POLDIP2	2670	17	28346633	28357527	DNA polymerase delta interacting protein 2 [Source:HGNC Symbol;Acc:HGNC:23781]	4654	4446	4402	4122
ENSG00000004399	PLXND1	9557	3	129555214	129606676	plexin D1 [Source:HGNC Symbol;Acc:HGNC:9107]	952	843	2976	2724
ENSG00000004455	AK2	17967	1	33007986	33080996	adenylate kinase 2 [Source:HGNC Symbol;Acc:HGNC:362]	8421	8296	7710	7645
ENSG00000004468	CD38	6857	4	15778275	15853232	CD38 molecule [Source:HGNC Symbol;Acc:HGNC:1667]	28	44	13	18
ENSG00000004478	FKBP4	5163	12	2794970	2805423	FKBP prolyl isomerase 4 [Source:HGNC Symbol;Acc:HGNC:3720]	5025	5034	4727	4791
ENSG00000004487	KDM1A	18325	1	23019443	23083689	lysine demethylase 1A [Source:HGNC Symbol;Acc:HGNC:29079]	8155	7788	9480	9486
ENSG00000004534	RBM6	7299	3	49940007	50100045	RNA binding motif protein 6 [Source:HGNC Symbol;Acc:HGNC:9903]	1519	1646	2193	2234
ENSG00000004660	CAMKK1	7433	17	3860315	3894891	calcium/calmodulin dependent protein kinase kinase 1 [Source:HGNC Symbol;Acc:HGNC:1469]	63	36	66	100
ENSG00000004700	RECQL	3779	12	21468910	21501669	RecQ like helicase [Source:HGNC Symbol;Acc:HGNC:9948]	872	985	1197	946
ENSG00000004766	VPS50	9559	7	93232340	93361123	VPS50 subunit of EARP/GARPII complex [Source:HGNC Symbol;Acc:HGNC:25956]	537	577	794	750
ENSG00000004776	HSPB6	1724	19	35754566	35758079	heat shock protein family B (small) member 6 [Source:HGNC Symbol;Acc:HGNC:26511]	3	3	2	6
ENSG00000004777	ARHGAP33	5260	19	35774532	35788822	Rho GTPase activating protein 33 [Source:HGNC Symbol;Acc:HGNC:23085]	506	568	801	751
ENSG00000004779	NDUFAB1	1548	16	23581014	23596316	NADH:ubiquinone oxidoreductase subunit AB1 [Source:HGNC Symbol;Acc:HGNC:7694]	898	1187	1105	1050
ENSG00000004799	PDK4	4544	7	95583499	95596516	pyruvate dehydrogenase kinase 4 [Source:HGNC Symbol;Acc:HGNC:8812]	341	377	80	97
ENSG00000004809	SLC22A16	3907	6	110424687	110476641	solute carrier family 22 member 16 [Source:HGNC Symbol;Acc:HGNC:20302]	0	0	0	0
ENSG00000004838	ZMYND10	2889	3	50341110	50345732	zinc finger MYND-type containing 10 [Source:HGNC Symbol;Acc:HGNC:19412]	14	21	18	48
ENSG00000004846	ABCB5	8796	7	20615667	20777038	ATP binding cassette subfamily B member 5 [Source:HGNC Symbol;Acc:HGNC:46]	0	0	0	0
ENSG00000004848	ARX	3114	X	25003694	25016420	aristaless related homeobox [Source:HGNC Symbol;Acc:HGNC:18060]	1	7	33	17
ENSG00000004864	SLC25A13	3710	7	96120220	96322147	solute carrier family 25 member 13 [Source:HGNC Symbol;Acc:HGNC:10983]	2983	2817	2314	2517
ENSG00000004866	ST7	6526	7	116953238	117230176	suppression of tumorigenicity 7 [Source:HGNC Symbol;Acc:HGNC:11351]	643	553	652	664
ENSG00000004897	CDC27	6824	17	47117703	47189422	cell division cycle 27 [Source:HGNC Symbol;Acc:HGNC:1728]	2287	2432	2436	2263
ENSG00000004961	HCCS	2343	X	11111301	11123086	holocytochrome c synthase [Source:HGNC Symbol;Acc:HGNC:4837]	2433	2541	2244	1954
ENSG00000004975	DVL2	5321	17	7225342	7234517	dishevelled segment polarity protein 2 [Source:HGNC Symbol;Acc:HGNC:3086]	1577	1409	1299	1072
ENSG00000005001	PRSS22	2384	16	2852730	2858170	serine protease 22 [Source:HGNC Symbol;Acc:HGNC:14368]	1156	1393	1018	964
ENSG00000005007	UPF1	8934	19	18831959	18868230	UPF1 RNA helicase and ATPase [Source:HGNC Symbol;Acc:HGNC:9962]	2992	3168	14928	14431
ENSG00000005020	SKAP2	5361	7	26667068	26995239	src kinase associated phosphoprotein 2 [Source:HGNC Symbol;Acc:HGNC:15687]	3685	4147	3290	3055
ENSG00000005022	SLC25A5	1555	X	119468422	119471396	solute carrier family 25 member 5 [Source:HGNC Symbol;Acc:HGNC:10991]	10742	12379	14468	13008
ENSG00000005059	MCUB	3555	4	109560209	109688719	mitochondrial calcium uniporter dominant negative subunit beta [Source:HGNC Symbol;Acc:HGNC:26076]	446	407	441	429
ENSG00000005073	HOXA11	2669	7	27181157	27185232	homeobox A11 [Source:HGNC Symbol;Acc:HGNC:5101]	19	22	42	29
ENSG00000005075	POLR2J	937	7	102473128	102478922	RNA polymerase II subunit J [Source:HGNC Symbol;Acc:HGNC:9197]	601	605	587	531
ENSG00000005100	DHX33	5789	17	5440917	5468982	DEAH-box helicase 33 [Source:HGNC Symbol;Acc:HGNC:16718]	2182	1785	2575	2593
ENSG00000005102	MEOX1	2674	17	43640389	43661922	mesenchyme homeobox 1 [Source:HGNC Symbol;Acc:HGNC:7013]	0	0	0	0
ENSG00000005108	THSD7A	10915	7	11370365	11832198	thrombospondin type 1 domain containing 7A [Source:HGNC Symbol;Acc:HGNC:22207]	537	392	225	255
ENSG00000005156	LIG3	12901	17	34980512	35009743	DNA ligase 3 [Source:HGNC Symbol;Acc:HGNC:6600]	1323	1176	1529	1562
ENSG00000005175	RPAP3	5350	12	47661249	47706030	RNA polymerase II associated protein 3 [Source:HGNC Symbol;Acc:HGNC:26151]	1156	1378	1416	1425
ENSG00000005187	ACSM3	7510	16	20610243	20797581	acyl-CoA synthetase medium chain family member 3 [Source:HGNC Symbol;Acc:HGNC:10522]	6	0	0	5
ENSG00000005189	REXO5	4111	16	20806429	20849665	RNA exonuclease 5 [Source:HGNC Symbol;Acc:HGNC:24661]	246	273	411	404
ENSG00000005194	CIAPIN1	3383	16	57428187	57447420	cytokine induced apoptosis inhibitor 1 [Source:HGNC Symbol;Acc:HGNC:28050]	2928	2893	3303	3028
ENSG00000005206	SPPL2B	7419	19	2328615	2355095	signal peptide peptidase like 2B [Source:HGNC Symbol;Acc:HGNC:30627]	1541	1773	1515	1589
ENSG00000005238	ATOSB	6375	9	35104112	35116341	atos homolog B [Source:HGNC Symbol;Acc:HGNC:25666]	982	1120	993	902
ENSG00000005243	COPZ2	1866	17	48026167	48038030	COPI coat complex subunit zeta 2 [Source:HGNC Symbol;Acc:HGNC:19356]	0	4	0	8
ENSG00000005249	PRKAR2B	12581	7	107044705	107161811	protein kinase cAMP-dependent type II regulatory subunit beta [Source:HGNC Symbol;Acc:HGNC:9392]	1628	1851	3378	3105
ENSG00000005302	MSL3	9780	X	11758159	11775772	MSL complex subunit 3 [Source:HGNC Symbol;Acc:HGNC:7370]	1373	1563	1953	1753
ENSG00000005339	CREBBP	15479	16	3725054	3880713	CREB binding protein [Source:HGNC Symbol;Acc:HGNC:2348]	4596	3472	5062	4326
ENSG00000005379	TSPOAP1	11389	17	58301228	58328795	TSPO associated protein 1 [Source:HGNC Symbol;Acc:HGNC:16831]	417	452	426	484
ENSG00000005421	PON1	2657	7	95297676	95324532	paraoxonase 1 [Source:HGNC Symbol;Acc:HGNC:9204]	0	0	3	0
ENSG00000005436	GCFC2	5462	2	75652000	75710985	GC-rich sequence DNA-binding factor 2 [Source:HGNC Symbol;Acc:HGNC:1317]	1047	1326	1363	1331
ENSG00000005448	WDR54	2852	2	74421678	74425755	WD repeat domain 54 [Source:HGNC Symbol;Acc:HGNC:25770]	133	229	245	192
ENSG00000005469	CROT	4995	7	87345664	87399794	carnitine O-octanoyltransferase [Source:HGNC Symbol;Acc:HGNC:2366]	316	417	497	313
ENSG00000005471	ABCB4	7728	7	87401696	87480435	ATP binding cassette subfamily B member 4 [Source:HGNC Symbol;Acc:HGNC:45]	4	0	0	0
ENSG00000005483	KMT2E	13704	7	104940943	105115019	lysine methyltransferase 2E (inactive) [Source:HGNC Symbol;Acc:HGNC:18541]	3464	3362	3183	3297
ENSG00000005486	RHBDD2	2390	7	75842602	75888926	rhomboid domain containing 2 [Source:HGNC Symbol;Acc:HGNC:23082]	2823	2361	2316	2189
ENSG00000005700	IBTK	8719	6	82169986	82247754	inhibitor of Bruton tyrosine kinase [Source:HGNC Symbol;Acc:HGNC:17853]	3832	3984	5093	4663
ENSG00000005801	ZNF195	11711	11	3339261	3379222	zinc finger protein 195 [Source:HGNC Symbol;Acc:HGNC:12986]	559	625	455	550
ENSG00000005810	MYCBP2	34127	13	77042474	77327094	MYC binding protein 2 [Source:HGNC Symbol;Acc:HGNC:23386]	3146	2976	3708	3080
ENSG00000005812	FBXL3	7076	13	76992598	77027195	F-box and leucine rich repeat protein 3 [Source:HGNC Symbol;Acc:HGNC:13599]	1386	1808	1923	1898
ENSG00000005844	ITGAL	9864	16	30472658	30523567	integrin subunit alpha L [Source:HGNC Symbol;Acc:HGNC:6148]	101	98	96	97
ENSG00000005882	PDK2	5471	17	50094737	50112152	pyruvate dehydrogenase kinase 2 [Source:HGNC Symbol;Acc:HGNC:8810]	218	181	219	225
ENSG00000005884	ITGA3	9802	17	50055968	50090481	integrin subunit alpha 3 [Source:HGNC Symbol;Acc:HGNC:6139]	11585	10211	9777	9709
ENSG00000005889	ZFX	9037	X	24149173	24216255	zinc finger protein X-linked [Source:HGNC Symbol;Acc:HGNC:12869]	1088	1246	1776	1605
ENSG00000005893	LAMP2	10628	X	120426148	120469365	lysosomal associated membrane protein 2 [Source:HGNC Symbol;Acc:HGNC:6501]	7170	7537	7694	7389
ENSG00000005961	ITGA2B	5695	17	44372180	44389649	integrin subunit alpha 2b [Source:HGNC Symbol;Acc:HGNC:6138]	26	41	52	83
ENSG00000005981	ASB4	4606	7	95478444	95540233	ankyrin repeat and SOCS box containing 4 [Source:HGNC Symbol;Acc:HGNC:16009]	0	0	2	4
ENSG00000006007	GDE1	4390	16	19501693	19522123	glycerophosphodiester phosphodiesterase 1 [Source:HGNC Symbol;Acc:HGNC:29644]	4182	4086	5031	4873
ENSG00000006015	REX1BD	3371	19	18588685	18592337	required for excision 1-B domain containing [Source:HGNC Symbol;Acc:HGNC:26098]	1111	1468	1492	1296
ENSG00000006016	CRLF1	2967	19	18572220	18607741	cytokine receptor like factor 1 [Source:HGNC Symbol;Acc:HGNC:2364]	210	173	158	134
ENSG00000006025	OSBPL7	6541	17	47807372	47821803	oxysterol binding protein like 7 [Source:HGNC Symbol;Acc:HGNC:16387]	412	446	612	671
ENSG00000006042	TMEM98	5187	17	32927910	32945106	transmembrane protein 98 [Source:HGNC Symbol;Acc:HGNC:24529]	10	23	17	10
ENSG00000006047	YBX2	4631	17	7288263	7294639	Y-box binding protein 2 [Source:HGNC Symbol;Acc:HGNC:17948]	576	613	475	509
ENSG00000006062	MAP3K14	5668	17	45263119	45317029	mitogen-activated protein kinase kinase kinase 14 [Source:HGNC Symbol;Acc:HGNC:6853]	1127	931	579	531
ENSG00000006118	TMEM132A	7274	11	60924460	60937159	transmembrane protein 132A [Source:HGNC Symbol;Acc:HGNC:31092]	14010	12831	14781	14700
ENSG00000006125	AP2B1	7591	17	35578046	35726413	adaptor related protein complex 2 subunit beta 1 [Source:HGNC Symbol;Acc:HGNC:563]	11713	10641	10679	10178
ENSG00000006194	ZNF263	8450	16	3283283	3301401	zinc finger protein 263 [Source:HGNC Symbol;Acc:HGNC:13056]	423	630	356	417
ENSG00000006210	CX3CL1	5960	16	57372477	57385044	C-X3-C motif chemokine ligand 1 [Source:HGNC Symbol;Acc:HGNC:10647]	5630	5825	4430	4088
ENSG00000006282	SPATA20	5237	17	50543058	50555852	spermatogenesis associated 20 [Source:HGNC Symbol;Acc:HGNC:26125]	768	739	755	729
ENSG00000006283	CACNA1G	10062	17	50560715	50627474	calcium voltage-gated channel subunit alpha1 G [Source:HGNC Symbol;Acc:HGNC:1394]	18	10	6	21
ENSG00000006327	TNFRSF12A	1801	16	3018445	3022383	TNF receptor superfamily member 12A [Source:HGNC Symbol;Acc:HGNC:18152]	3394	5300	3493	2799
ENSG00000006432	MAP3K9	12386	14	70722526	70809534	mitogen-activated protein kinase kinase kinase 9 [Source:HGNC Symbol;Acc:HGNC:6861]	5050	4162	3870	3795
ENSG00000006451	RALA	3579	7	39623565	39708120	RAS like proto-oncogene A [Source:HGNC Symbol;Acc:HGNC:9839]	2565	3471	4338	4309
ENSG00000006453	BAIAP2L1	4821	7	98291650	98401090	BAR/IMD domain containing adaptor protein 2 like 1 [Source:HGNC Symbol;Acc:HGNC:21649]	1822	1866	1268	1269
ENSG00000006459	KDM7A	9378	7	140084746	140176983	lysine demethylase 7A [Source:HGNC Symbol;Acc:HGNC:22224]	667	650	717	767
ENSG00000006468	ETV1	9592	7	13891229	13991425	ETS variant transcription factor 1 [Source:HGNC Symbol;Acc:HGNC:3490]	201	237	239	142
ENSG00000006530	AGK	10697	7	141551278	141655244	acylglycerol kinase [Source:HGNC Symbol;Acc:HGNC:21869]	1143	1406	1164	1244
ENSG00000006534	ALDH3B1	6622	11	68008578	68029282	aldehyde dehydrogenase 3 family member B1 [Source:HGNC Symbol;Acc:HGNC:410]	1273	1065	628	603
ENSG00000006555	TTC22	6111	1	54779712	54801323	tetratricopeptide repeat domain 22 [Source:HGNC Symbol;Acc:HGNC:26067]	628	709	554	475
ENSG00000006576	PHTF2	8665	7	77798773	77957503	putative homeodomain transcription factor 2 [Source:HGNC Symbol;Acc:HGNC:13411]	1311	1530	1348	1244
ENSG00000006606	CCL26	703	7	75769533	75789896	C-C motif chemokine ligand 26 [Source:HGNC Symbol;Acc:HGNC:10625]	0	2	0	0
ENSG00000006607	FARP2	14371	2	241356285	241494841	FERM, ARH/RhoGEF and pleckstrin domain protein 2 [Source:HGNC Symbol;Acc:HGNC:16460]	2123	1859	1876	1796
ENSG00000006625	GGCT	1594	7	30496621	30504841	gamma-glutamylcyclotransferase [Source:HGNC Symbol;Acc:HGNC:21705]	976	1350	1518	1283
ENSG00000006634	DBF4	4595	7	87876216	87909553	DBF4 zinc finger [Source:HGNC Symbol;Acc:HGNC:17364]	839	933	1496	1515
ENSG00000006638	TBXA2R	2827	19	3594507	3606875	thromboxane A2 receptor [Source:HGNC Symbol;Acc:HGNC:11608]	8	4	26	21
ENSG00000006652	IFRD1	7902	7	112422887	112481017	interferon related developmental regulator 1 [Source:HGNC Symbol;Acc:HGNC:5456]	660	998	603	475
ENSG00000006659	LGALS14	904	19	39704481	39709444	galectin 14 [Source:HGNC Symbol;Acc:HGNC:30054]	0	0	0	0
ENSG00000006695	COX10	6756	17	14069490	14231736	cytochrome c oxidase assembly factor heme A:farnesyltransferase COX10 [Source:HGNC Symbol;Acc:HGNC:2260]	916	889	861	991
ENSG00000006704	GTF2IRD1	6499	7	74453790	74602605	GTF2I repeat domain containing 1 [Source:HGNC Symbol;Acc:HGNC:4661]	1728	1613	1558	1822
ENSG00000006712	PAF1	2850	19	39385629	39391154	PAF1 homolog, Paf1/RNA polymerase II complex component [Source:HGNC Symbol;Acc:HGNC:25459]	3471	3725	3690	3419
ENSG00000006715	VPS41	7752	7	38722974	38932394	VPS41 subunit of HOPS complex [Source:HGNC Symbol;Acc:HGNC:12713]	1893	2160	2737	2536
ENSG00000006740	ARHGAP44	9322	17	12789498	12991643	Rho GTPase activating protein 44 [Source:HGNC Symbol;Acc:HGNC:29096]	4	9	4	9
ENSG00000006744	ELAC2	7002	17	12991612	13018065	elaC ribonuclease Z 2 [Source:HGNC Symbol;Acc:HGNC:14198]	3228	2669	3187	3265
ENSG00000006747	SCIN	11626	7	12570577	12660182	scinderin [Source:HGNC Symbol;Acc:HGNC:21695]	37	45	70	37
ENSG00000006756	ARSD	7026	X	2903972	2929349	arylsulfatase D [Source:HGNC Symbol;Acc:HGNC:717]	1801	1578	1987	2203
ENSG00000006757	PNPLA4	3411	X	7898247	7927739	patatin like phospholipase domain containing 4 [Source:HGNC Symbol;Acc:HGNC:24887]	141	203	229	200
ENSG00000006831	ADIPOR2	5831	12	1688574	1788674	adiponectin receptor 2 [Source:HGNC Symbol;Acc:HGNC:24041]	3787	3624	2875	3008
ENSG00000006837	CDKL3	3149	5	134286350	134371047	cyclin dependent kinase like 3 [Source:HGNC Symbol;Acc:HGNC:15483]	11	12	15	13
ENSG00000007001	UPP2	2957	2	157876702	158136154	uridine phosphorylase 2 [Source:HGNC Symbol;Acc:HGNC:23061]	4	15	9	8
ENSG00000007047	MARK4	6656	19	45079288	45305284	microtubule affinity regulating kinase 4 [Source:HGNC Symbol;Acc:HGNC:13538]	2015	1849	2228	2168
ENSG00000007062	PROM1	7457	4	15963076	16084378	prominin 1 [Source:HGNC Symbol;Acc:HGNC:9454]	5732	5629	5975	6095
ENSG00000007080	CCDC124	1661	19	17933015	17943991	coiled-coil domain containing 124 [Source:HGNC Symbol;Acc:HGNC:25171]	3798	3875	3606	3303
ENSG00000007168	PAFAH1B1	13771	17	2593210	2685615	platelet activating factor acetylhydrolase 1b regulatory subunit 1 [Source:HGNC Symbol;Acc:HGNC:8574]	4888	4611	4234	4271
ENSG00000007171	NOS2	6129	17	27756766	27800529	nitric oxide synthase 2 [Source:HGNC Symbol;Acc:HGNC:7873]	0	0	0	0
ENSG00000007174	DNAH9	16941	17	11598470	11969748	dynein axonemal heavy chain 9 [Source:HGNC Symbol;Acc:HGNC:2953]	2	0	2	5
ENSG00000007202	BLTP2	9232	17	28614446	28645454	bridge-like lipid transfer protein family member 2 [Source:HGNC Symbol;Acc:HGNC:28960]	8650	6726	8535	8930
ENSG00000007216	SLC13A2	3226	17	28473293	28497781	solute carrier family 13 member 2 [Source:HGNC Symbol;Acc:HGNC:10917]	0	0	0	0
ENSG00000007237	GAS7	10158	17	9910606	10198606	growth arrest specific 7 [Source:HGNC Symbol;Acc:HGNC:4169]	4456	3877	5841	5543
ENSG00000007255	TRAPPC6A	933	19	45162928	45178237	trafficking protein particle complex subunit 6A [Source:HGNC Symbol;Acc:HGNC:23069]	901	1104	728	780
ENSG00000007264	MATK	4138	19	3777970	3802129	megakaryocyte-associated tyrosine kinase [Source:HGNC Symbol;Acc:HGNC:6906]	0	5	2	4
ENSG00000007306	CEACAM7	2653	19	41673303	41706976	CEA cell adhesion molecule 7 [Source:HGNC Symbol;Acc:HGNC:1819]	0	2	0	0
ENSG00000007341	ST7L	8108	1	112523514	112620825	suppression of tumorigenicity 7 like [Source:HGNC Symbol;Acc:HGNC:18441]	560	583	652	618
ENSG00000007372	PAX6	20639	11	31784779	31817961	paired box 6 [Source:HGNC Symbol;Acc:HGNC:8620]	221	192	193	211
ENSG00000007376	RPUSD1	2769	16	784974	788397	RNA pseudouridine synthase domain containing 1 [Source:HGNC Symbol;Acc:HGNC:14173]	1149	1105	1061	1045
ENSG00000007384	RHBDF1	4914	16	58059	76355	rhomboid 5 homolog 1 [Source:HGNC Symbol;Acc:HGNC:20561]	1196	1428	1894	1724
ENSG00000007392	LUC7L	6176	16	188969	229463	LUC7 like [Source:HGNC Symbol;Acc:HGNC:6723]	575	758	886	965
ENSG00000007402	CACNA2D2	6508	3	50362613	50504244	calcium voltage-gated channel auxiliary subunit alpha2delta 2 [Source:HGNC Symbol;Acc:HGNC:1400]	53	62	76	67
ENSG00000007516	BAIAP3	6808	16	1333638	1349439	BAI1 associated protein 3 [Source:HGNC Symbol;Acc:HGNC:948]	12	12	7	17
ENSG00000007520	TSR3	1210	16	1349240	1351878	TSR3 ribosome maturation factor [Source:HGNC Symbol;Acc:HGNC:14175]	1281	1378	1509	1364
ENSG00000007541	PIGQ	7856	16	566995	584109	phosphatidylinositol glycan anchor biosynthesis class Q [Source:HGNC Symbol;Acc:HGNC:14135]	1684	1287	1687	1688
ENSG00000007545	CRAMP1	8596	16	1612337	1677908	cramped chromatin regulator homolog 1 [Source:HGNC Symbol;Acc:HGNC:14122]	1022	923	1214	1119
ENSG00000007866	TEAD3	3049	6	35473597	35497079	TEA domain transcription factor 3 [Source:HGNC Symbol;Acc:HGNC:11716]	3035	2908	3869	4004
ENSG00000007908	SELE	4586	1	169722640	169764705	selectin E [Source:HGNC Symbol;Acc:HGNC:10718]	2	0	0	4
ENSG00000007923	DNAJC11	12182	1	6634168	6701924	DnaJ heat shock protein family (Hsp40) member C11 [Source:HGNC Symbol;Acc:HGNC:25570]	1311	1294	1378	1560
ENSG00000007933	FMO3	3439	1	171090901	171117819	flavin containing dimethylaniline monoxygenase 3 [Source:HGNC Symbol;Acc:HGNC:3771]	12	39	17	36
ENSG00000007944	MYLIP	3072	6	16129086	16148248	myosin regulatory light chain interacting protein [Source:HGNC Symbol;Acc:HGNC:21155]	721	636	736	754
ENSG00000007952	NOX1	2543	X	100843324	100874359	NADPH oxidase 1 [Source:HGNC Symbol;Acc:HGNC:7889]	8	8	13	17
ENSG00000007968	E2F2	5462	1	23506438	23531233	E2F transcription factor 2 [Source:HGNC Symbol;Acc:HGNC:3114]	4011	3502	4820	4837
ENSG00000008018	PSMB1	2219	6	170535120	170553307	proteasome 20S subunit beta 1 [Source:HGNC Symbol;Acc:HGNC:9537]	4778	5736	5836	5832
ENSG00000008056	SYN1	3733	X	47571901	47619857	synapsin I [Source:HGNC Symbol;Acc:HGNC:11494]	8	18	7	5
ENSG00000008083	JARID2	6244	6	15246069	15522042	jumonji and AT-rich interaction domain containing 2 [Source:HGNC Symbol;Acc:HGNC:6196]	2472	2186	2145	2078
ENSG00000008086	CDKL5	19056	X	18425583	18653629	cyclin dependent kinase like 5 [Source:HGNC Symbol;Acc:HGNC:11411]	631	625	739	743
ENSG00000008118	CAMK1G	3328	1	209583714	209613939	calcium/calmodulin dependent protein kinase IG [Source:HGNC Symbol;Acc:HGNC:14585]	1	2	7	0
ENSG00000008128	CDK11A	5085	1	1702379	1724357	cyclin dependent kinase 11A [Source:HGNC Symbol;Acc:HGNC:1730]	62	59	40	37
ENSG00000008130	NADK	5570	1	1751232	1780457	NAD kinase [Source:HGNC Symbol;Acc:HGNC:29831]	2181	2454	2861	2470
ENSG00000008196	TFAP2B	6155	6	50818723	50847619	transcription factor AP-2 beta [Source:HGNC Symbol;Acc:HGNC:11743]	6	3	4	14
ENSG00000008197	TFAP2D	2203	6	50713526	50773033	transcription factor AP-2 delta [Source:HGNC Symbol;Acc:HGNC:15581]	0	0	0	0
ENSG00000008226	DLEC1	8338	3	38039205	38124025	DLEC1 cilia and flagella associated protein [Source:HGNC Symbol;Acc:HGNC:2899]	11	11	12	12
ENSG00000008256	CYTH3	5802	7	6161779	6272644	cytohesin 3 [Source:HGNC Symbol;Acc:HGNC:9504]	2794	3014	2792	2466
ENSG00000008277	ADAM22	13668	7	87934143	88202889	ADAM metallopeptidase domain 22 [Source:HGNC Symbol;Acc:HGNC:201]	421	391	519	535
ENSG00000008282	SYPL1	2909	7	106090505	106112589	synaptophysin like 1 [Source:HGNC Symbol;Acc:HGNC:11507]	2794	3408	4374	3821
ENSG00000008283	CYB561	5296	17	63432304	63446354	cytochrome b561 [Source:HGNC Symbol;Acc:HGNC:2571]	6150	5757	4238	4357
ENSG00000008294	SPAG9	11951	17	50962174	51120868	sperm associated antigen 9 [Source:HGNC Symbol;Acc:HGNC:14524]	3675	3481	3708	3579
ENSG00000008300	CELSR3	13850	3	48636463	48662886	cadherin EGF LAG seven-pass G-type receptor 3 [Source:HGNC Symbol;Acc:HGNC:3230]	252	195	261	243
ENSG00000008311	AASS	10816	7	122064583	122144308	aminoadipate-semialdehyde synthase [Source:HGNC Symbol;Acc:HGNC:17366]	0	0	0	2
ENSG00000008323	PLEKHG6	4316	12	6310436	6328506	pleckstrin homology and RhoGEF domain containing G6 [Source:HGNC Symbol;Acc:HGNC:25562]	482	466	389	375
ENSG00000008324	SS18L2	3118	3	42581840	42596934	SS18 like 2 [Source:HGNC Symbol;Acc:HGNC:15593]	155	307	238	243
ENSG00000008382	MPND	2049	19	4343527	4360086	MPN domain containing [Source:HGNC Symbol;Acc:HGNC:25934]	311	223	205	244
ENSG00000008394	MGST1	7441	12	16347142	16609259	microsomal glutathione S-transferase 1 [Source:HGNC Symbol;Acc:HGNC:7061]	3493	4716	5083	4406
ENSG00000008405	CRY1	4782	12	106991364	107093549	cryptochrome circadian regulator 1 [Source:HGNC Symbol;Acc:HGNC:2384]	1040	1112	1131	1109
ENSG00000008438	PGLYRP1	708	19	46019153	46023053	peptidoglycan recognition protein 1 [Source:HGNC Symbol;Acc:HGNC:8904]	0	5	4	2
ENSG00000008441	NFIX	6486	19	12995475	13098796	nuclear factor I X [Source:HGNC Symbol;Acc:HGNC:7788]	13304	10524	12442	13495
ENSG00000008513	ST3GAL1	8787	8	133454848	133571926	ST3 beta-galactoside alpha-2,3-sialyltransferase 1 [Source:HGNC Symbol;Acc:HGNC:10862]	4042	3635	4270	4231
ENSG00000008516	MMP25	4745	16	3046062	3060726	matrix metallopeptidase 25 [Source:HGNC Symbol;Acc:HGNC:14246]	16	31	9	38
ENSG00000008517	IL32	3209	16	3065297	3082192	interleukin 32 [Source:HGNC Symbol;Acc:HGNC:16830]	12	28	9	10
ENSG00000008710	PKD1	18534	16	2088708	2135898	polycystin 1, transient receptor potential channel interacting [Source:HGNC Symbol;Acc:HGNC:9008]	3865	3538	4089	3866
ENSG00000008735	MAPK8IP2	5793	22	50600793	50613981	mitogen-activated protein kinase 8 interacting protein 2 [Source:HGNC Symbol;Acc:HGNC:6883]	304	289	349	274
ENSG00000008838	MED24	6962	17	40019097	40061215	mediator complex subunit 24 [Source:HGNC Symbol;Acc:HGNC:22963]	3040	2866	2553	2780
ENSG00000008853	RHOBTB2	7408	8	22987417	23020509	Rho related BTB domain containing 2 [Source:HGNC Symbol;Acc:HGNC:18756]	603	605	733	676
ENSG00000008869	HEATR5B	8238	2	36968383	37084372	HEAT repeat containing 5B [Source:HGNC Symbol;Acc:HGNC:29273]	2675	2614	2866	2771
ENSG00000008952	SEC62	7928	3	169966635	169998373	SEC62 homolog, preprotein translocation factor [Source:HGNC Symbol;Acc:HGNC:11846]	2871	3061	3656	3778
ENSG00000008988	RPS20	6765	8	56067254	56074510	ribosomal protein S20 [Source:HGNC Symbol;Acc:HGNC:10405]	5078	6751	7563	7047
ENSG00000009307	CSDE1	9830	1	114716913	114758676	cold shock domain containing E1 [Source:HGNC Symbol;Acc:HGNC:29905]	42702	43686	53730	52286
ENSG00000009335	UBE3C	9203	7	157138926	157269370	ubiquitin protein ligase E3C [Source:HGNC Symbol;Acc:HGNC:16803]	5896	5458	5533	5107
ENSG00000009413	REV3L	12420	6	111299028	111483715	REV3 like, DNA directed polymerase zeta catalytic subunit [Source:HGNC Symbol;Acc:HGNC:9968]	3860	3825	3947	3782
ENSG00000009694	TENM1	13547	X	124375903	125204312	teneurin transmembrane protein 1 [Source:HGNC Symbol;Acc:HGNC:8117]	64	84	77	71
ENSG00000009709	PAX7	6473	1	18630846	18748866	paired box 7 [Source:HGNC Symbol;Acc:HGNC:8621]	378	345	800	896
ENSG00000009724	MASP2	5113	1	11022009	11047239	MBL associated serine protease 2 [Source:HGNC Symbol;Acc:HGNC:6902]	35	28	69	69
ENSG00000009765	IYD	10362	6	150368892	150405969	iodotyrosine deiodinase [Source:HGNC Symbol;Acc:HGNC:21071]	10	28	6	6
ENSG00000009780	FAM76A	4046	1	27725961	27763116	family with sequence similarity 76 member A [Source:HGNC Symbol;Acc:HGNC:28530]	379	286	407	525
ENSG00000009790	TRAF3IP3	7750	1	209756032	209782320	TRAF3 interacting protein 3 [Source:HGNC Symbol;Acc:HGNC:30766]	7	12	11	8
ENSG00000009830	POMT2	13203	14	77274956	77320883	protein O-mannosyltransferase 2 [Source:HGNC Symbol;Acc:HGNC:19743]	1456	1449	1336	1600
ENSG00000009844	VTA1	7258	6	142147162	142224685	vesicle trafficking 1 [Source:HGNC Symbol;Acc:HGNC:20954]	2950	3279	3024	2788
ENSG00000009950	MLXIPL	4815	7	73593194	73624543	MLX interacting protein like [Source:HGNC Symbol;Acc:HGNC:12744]	10	22	48	45
ENSG00000009954	BAZ1B	7060	7	73440406	73522293	bromodomain adjacent to zinc finger domain 1B [Source:HGNC Symbol;Acc:HGNC:961]	5783	4742	7201	7275
ENSG00000010017	RANBP9	3618	6	13621498	13711835	RAN binding protein 9 [Source:HGNC Symbol;Acc:HGNC:13727]	5555	6566	5765	5609
ENSG00000010030	ETV7	2374	6	36354091	36387800	ETS variant transcription factor 7 [Source:HGNC Symbol;Acc:HGNC:18160]	379	364	329	357
ENSG00000010072	SPRTN	5906	1	231337104	231355023	SprT-like N-terminal domain [Source:HGNC Symbol;Acc:HGNC:25356]	739	873	1040	1020
ENSG00000010165	METTL13	3831	1	171781660	171814023	methyltransferase 13, eEF1A lysine and N-terminal methyltransferase [Source:HGNC Symbol;Acc:HGNC:24248]	3384	3075	3419	3305
ENSG00000010219	DYRK4	7050	12	4562208	4615302	dual specificity tyrosine phosphorylation regulated kinase 4 [Source:HGNC Symbol;Acc:HGNC:3095]	81	65	104	134
ENSG00000010244	ZNF207	15818	17	32350132	32381885	zinc finger protein 207 [Source:HGNC Symbol;Acc:HGNC:12998]	4180	4377	4970	4655
ENSG00000010256	UQCRC1	3204	3	48599002	48610976	ubiquinol-cytochrome c reductase core protein 1 [Source:HGNC Symbol;Acc:HGNC:12585]	8893	8348	8505	8482
ENSG00000010270	STARD3NL	4324	7	38178245	38230670	STARD3 N-terminal like [Source:HGNC Symbol;Acc:HGNC:19169]	116	154	153	114
ENSG00000010278	CD9	5829	12	6199715	6238271	CD9 molecule [Source:HGNC Symbol;Acc:HGNC:1709]	3306	3642	3589	3195
ENSG00000010282	HHATL	2888	3	42692663	42702824	hedgehog acyltransferase like [Source:HGNC Symbol;Acc:HGNC:13242]	2	0	0	0
ENSG00000010292	NCAPD2	6470	12	6493356	6531955	non-SMC condensin I complex subunit D2 [Source:HGNC Symbol;Acc:HGNC:24305]	4632	4444	5647	5189
ENSG00000010295	IFFO1	4945	12	6538961	6556073	intermediate filament family orphan 1 [Source:HGNC Symbol;Acc:HGNC:24970]	1	2	4	6
ENSG00000010310	GIPR	5069	19	45668221	45683722	gastric inhibitory polypeptide receptor [Source:HGNC Symbol;Acc:HGNC:4271]	53	43	56	60
ENSG00000010318	PHF7	3364	3	52410660	52423641	PHD finger protein 7 [Source:HGNC Symbol;Acc:HGNC:18458]	86	146	181	86
ENSG00000010319	SEMA3G	5047	3	52433035	52445103	semaphorin 3G [Source:HGNC Symbol;Acc:HGNC:30400]	94	104	150	133
ENSG00000010322	NISCH	9062	3	52455118	52493068	nischarin [Source:HGNC Symbol;Acc:HGNC:18006]	4052	4204	3172	3058
ENSG00000010327	STAB1	10588	3	52495338	52524495	stabilin 1 [Source:HGNC Symbol;Acc:HGNC:18628]	2	2	0	2
ENSG00000010361	FUZ	2953	19	49806866	49817376	fuzzy planar cell polarity protein [Source:HGNC Symbol;Acc:HGNC:26219]	2	1	2	6
ENSG00000010379	SLC6A13	4243	12	220621	262873	solute carrier family 6 member 13 [Source:HGNC Symbol;Acc:HGNC:11046]	0	0	0	0
ENSG00000010404	IDS	9294	X	149476988	149521096	iduronate 2-sulfatase [Source:HGNC Symbol;Acc:HGNC:5389]	605	543	485	512
ENSG00000010438	PRSS3	1425	9	33750679	33799231	serine protease 3 [Source:HGNC Symbol;Acc:HGNC:9486]	2	4	0	4
ENSG00000010539	ZNF200	7498	16	3222325	3236221	zinc finger protein 200 [Source:HGNC Symbol;Acc:HGNC:12993]	483	415	416	469
ENSG00000010610	CD4	4557	12	6786858	6820799	CD4 molecule [Source:HGNC Symbol;Acc:HGNC:1678]	0	0	0	0
ENSG00000010626	LRRC23	3052	12	6873569	6914241	leucine rich repeat containing 23 [Source:HGNC Symbol;Acc:HGNC:19138]	127	113	131	156
ENSG00000010671	BTK	7817	X	101349338	101390796	Bruton tyrosine kinase [Source:HGNC Symbol;Acc:HGNC:1133]	2	6	1	0
ENSG00000010704	HFE	5675	6	26087281	26098343	homeostatic iron regulator [Source:HGNC Symbol;Acc:HGNC:4886]	628	641	600	560
ENSG00000010803	SCMH1	4602	1	41027202	41242306	Scm polycomb group protein homolog 1 [Source:HGNC Symbol;Acc:HGNC:19003]	3392	3464	2757	2573
ENSG00000010810	FYN	7411	6	111660332	111873452	FYN proto-oncogene, Src family tyrosine kinase [Source:HGNC Symbol;Acc:HGNC:4037]	122	116	107	72
ENSG00000010818	HIVEP2	11272	6	142751469	142956698	HIVEP zinc finger 2 [Source:HGNC Symbol;Acc:HGNC:4921]	4911	3831	3609	3320
ENSG00000010932	FMO1	3602	1	171248471	171285978	flavin containing dimethylaniline monoxygenase 1 [Source:HGNC Symbol;Acc:HGNC:3769]	5	4	4	3
ENSG00000011007	ELOA	5348	1	23743448	23762059	elongin A [Source:HGNC Symbol;Acc:HGNC:11620]	4387	4086	4275	4613
ENSG00000011009	LYPLA2	2021	1	23791145	23795539	lysophospholipase 2 [Source:HGNC Symbol;Acc:HGNC:6738]	4021	4435	4120	3590
ENSG00000011021	CLCN6	8173	1	11806096	11848079	chloride voltage-gated channel 6 [Source:HGNC Symbol;Acc:HGNC:2024]	553	606	640	691
ENSG00000011028	MRC2	6591	17	62627670	62693597	mannose receptor C type 2 [Source:HGNC Symbol;Acc:HGNC:16875]	66	49	68	89
ENSG00000011105	TSPAN9	6905	12	3077355	3286564	tetraspanin 9 [Source:HGNC Symbol;Acc:HGNC:21640]	4319	3806	4772	4786
ENSG00000011114	BTBD7	11333	14	93237550	93333092	BTB domain containing 7 [Source:HGNC Symbol;Acc:HGNC:18269]	1600	1601	2448	2314
ENSG00000011132	APBA3	5596	19	3750772	3761692	amyloid beta precursor protein binding family A member 3 [Source:HGNC Symbol;Acc:HGNC:580]	732	740	606	621
ENSG00000011143	MKS1	11285	17	58205441	58219605	MKS transition zone complex subunit 1 [Source:HGNC Symbol;Acc:HGNC:7121]	199	173	209	209
ENSG00000011198	ABHD5	7539	3	43690108	43734371	abhydrolase domain containing 5, lysophosphatidic acid acyltransferase [Source:HGNC Symbol;Acc:HGNC:21396]	1378	1488	1570	1546
ENSG00000011201	ANOS1	7082	X	8528874	8732137	anosmin 1 [Source:HGNC Symbol;Acc:HGNC:6211]	34	30	119	106
ENSG00000011243	AKAP8L	8576	19	15380050	15419141	A-kinase anchoring protein 8 like [Source:HGNC Symbol;Acc:HGNC:29857]	1310	1499	1539	1459
ENSG00000011258	MBTD1	7184	17	51177425	51260163	mbt domain containing 1 [Source:HGNC Symbol;Acc:HGNC:19866]	683	910	839	908
ENSG00000011260	UTP18	2703	17	51260546	51297936	UTP18 small subunit processome component [Source:HGNC Symbol;Acc:HGNC:24274]	1147	1485	1535	1773
ENSG00000011275	RNF216	7576	7	5620047	5781696	ring finger protein 216 [Source:HGNC Symbol;Acc:HGNC:21698]	4082	3864	3629	3672
ENSG00000011295	TTC19	6054	17	15999784	16045015	tetratricopeptide repeat domain 19 [Source:HGNC Symbol;Acc:HGNC:26006]	3811	3987	3793	3461
ENSG00000011304	PTBP1	7521	19	797075	812327	polypyrimidine tract binding protein 1 [Source:HGNC Symbol;Acc:HGNC:9583]	18864	18583	17381	16925
ENSG00000011332	DPF1	4800	19	38211006	38229714	double PHD fingers 1 [Source:HGNC Symbol;Acc:HGNC:20225]	187	157	202	192
ENSG00000011347	SYT7	7552	11	61513714	61581148	synaptotagmin 7 [Source:HGNC Symbol;Acc:HGNC:11514]	5032	4384	6971	7011
ENSG00000011376	LARS2	12407	3	45388561	45554726	leucyl-tRNA synthetase 2, mitochondrial [Source:HGNC Symbol;Acc:HGNC:17095]	844	918	1081	967
ENSG00000011405	PIK3C2A	9207	11	17077730	17207986	phosphatidylinositol-4-phosphate 3-kinase catalytic subunit type 2 alpha [Source:HGNC Symbol;Acc:HGNC:8971]	3262	3553	4365	4050
ENSG00000011422	PLAUR	4457	19	43646095	43670547	plasminogen activator, urokinase receptor [Source:HGNC Symbol;Acc:HGNC:9053]	685	845	816	825
ENSG00000011426	ANLN	5997	7	36389821	36453791	anillin, actin binding protein [Source:HGNC Symbol;Acc:HGNC:14082]	9576	10376	12445	12147
ENSG00000011451	WIZ	10037	19	15419978	15449956	WIZ zinc finger [Source:HGNC Symbol;Acc:HGNC:30917]	5530	4365	5329	5203
ENSG00000011454	RABGAP1	7656	9	122940833	123104866	RAB GTPase activating protein 1 [Source:HGNC Symbol;Acc:HGNC:17155]	2480	2148	2626	2423
ENSG00000011478	QPCTL	2825	19	45692403	45703989	glutaminyl-peptide cyclotransferase like [Source:HGNC Symbol;Acc:HGNC:25952]	1033	953	1179	1027
ENSG00000011485	PPP5C	7089	19	46347087	46392981	protein phosphatase 5 catalytic subunit [Source:HGNC Symbol;Acc:HGNC:9322]	3375	3418	3222	3043
ENSG00000011523	CEP68	11832	2	65056354	65087004	centrosomal protein 68 [Source:HGNC Symbol;Acc:HGNC:29076]	767	579	866	801
ENSG00000011566	MAP4K3	6056	2	39249266	39437301	mitogen-activated protein kinase kinase kinase kinase 3 [Source:HGNC Symbol;Acc:HGNC:6865]	1950	2317	2056	1987
ENSG00000011590	ZBTB32	2739	19	35704558	35717038	zinc finger and BTB domain containing 32 [Source:HGNC Symbol;Acc:HGNC:16763]	23	16	13	23
ENSG00000011638	LDAF1	2558	16	21158377	21180616	lipid droplet assembly factor 1 [Source:HGNC Symbol;Acc:HGNC:30136]	1339	1508	1179	1107
ENSG00000011677	GABRA3	4150	X	152166234	152451315	gamma-aminobutyric acid type A receptor subunit alpha3 [Source:HGNC Symbol;Acc:HGNC:4077]	2125	1823	1787	1638
ENSG00000012048	BRCA1	14160	17	43044295	43170245	BRCA1 DNA repair associated [Source:HGNC Symbol;Acc:HGNC:1100]	1608	1524	2196	2008
ENSG00000012061	ERCC1	5575	19	45407334	45478828	ERCC excision repair 1, endonuclease non-catalytic subunit [Source:HGNC Symbol;Acc:HGNC:3433]	1279	1294	1570	1384
ENSG00000012124	CD22	6165	19	35319261	35347361	CD22 molecule [Source:HGNC Symbol;Acc:HGNC:1643]	598	555	338	275
ENSG00000012171	SEMA3B	5768	3	50267558	50277546	semaphorin 3B [Source:HGNC Symbol;Acc:HGNC:10724]	254	268	181	127
ENSG00000012174	MBTPS2	8945	X	21839617	21885423	membrane bound transcription factor peptidase, site 2 [Source:HGNC Symbol;Acc:HGNC:15455]	1950	2049	2502	2213
ENSG00000012211	PRICKLE3	3656	X	49174802	49186528	prickle planar cell polarity protein 3 [Source:HGNC Symbol;Acc:HGNC:6645]	783	724	794	735
ENSG00000012223	LTF	3989	3	46435645	46485234	lactotransferrin [Source:HGNC Symbol;Acc:HGNC:6720]	0	0	0	0
ENSG00000012232	EXTL3	16477	8	28600469	28756561	exostosin like glycosyltransferase 3 [Source:HGNC Symbol;Acc:HGNC:3518]	4959	4250	2719	2707
ENSG00000012660	ELOVL5	3813	6	53267398	53349179	ELOVL fatty acid elongase 5 [Source:HGNC Symbol;Acc:HGNC:21308]	8098	8720	9021	8985
ENSG00000012779	ALOX5	3728	10	45374176	45446119	arachidonate 5-lipoxygenase [Source:HGNC Symbol;Acc:HGNC:435]	371	265	440	423
ENSG00000012822	CALCOCO1	8898	12	53708517	53727745	calcium binding and coiled-coil domain 1 [Source:HGNC Symbol;Acc:HGNC:29306]	1114	1258	1169	1087
ENSG00000012963	UBR7	3509	14	93207241	93229215	ubiquitin protein ligase E3 component n-recognin 7 [Source:HGNC Symbol;Acc:HGNC:20344]	1137	1059	958	963
ENSG00000012983	MAP4K5	7580	14	50418501	50561126	mitogen-activated protein kinase kinase kinase kinase 5 [Source:HGNC Symbol;Acc:HGNC:6867]	942	1169	1561	1567
ENSG00000013016	EHD3	4825	2	31234152	31269451	EH domain containing 3 [Source:HGNC Symbol;Acc:HGNC:3244]	308	246	294	327
ENSG00000013275	PSMC4	2550	19	39971165	39981764	proteasome 26S subunit, ATPase 4 [Source:HGNC Symbol;Acc:HGNC:9551]	4818	4389	4793	4608
ENSG00000013288	MAN2B2	8884	4	6575189	6623362	mannosidase alpha class 2B member 2 [Source:HGNC Symbol;Acc:HGNC:29623]	1742	1297	1339	1215
ENSG00000013297	CLDN11	4321	3	170418868	170454733	claudin 11 [Source:HGNC Symbol;Acc:HGNC:8514]	89	76	31	42
ENSG00000013306	SLC25A39	3526	17	44319625	44324870	solute carrier family 25 member 39 [Source:HGNC Symbol;Acc:HGNC:24279]	4530	5065	5154	4490
ENSG00000013364	MVP	6141	16	29820394	29848039	major vault protein [Source:HGNC Symbol;Acc:HGNC:7531]	4199	4041	3961	4275
ENSG00000013374	NUB1	5338	7	151341772	151378449	negative regulator of ubiquitin like proteins 1 [Source:HGNC Symbol;Acc:HGNC:17623]	2594	2516	2296	2429
ENSG00000013375	PGM3	22007	6	83147324	83193936	phosphoglucomutase 3 [Source:HGNC Symbol;Acc:HGNC:8907]	3016	3181	3150	3112
ENSG00000013392	RWDD2A	3769	6	83193357	83198935	RWD domain containing 2A [Source:HGNC Symbol;Acc:HGNC:21385]	270	313	345	309
ENSG00000013441	CLK1	5117	2	200853009	200864691	CDC like kinase 1 [Source:HGNC Symbol;Acc:HGNC:2068]	557	768	820	777
ENSG00000013503	POLR3B	4768	12	106357748	106510198	RNA polymerase III subunit B [Source:HGNC Symbol;Acc:HGNC:30348]	623	622	722	711
ENSG00000013523	ANGEL1	6525	14	76786009	76826246	angel homolog 1 [Source:HGNC Symbol;Acc:HGNC:19961]	694	686	738	618
ENSG00000013561	RNF14	4988	5	141958328	141990292	ring finger protein 14 [Source:HGNC Symbol;Acc:HGNC:10058]	2505	2576	2362	2121
ENSG00000013563	DNASE1L1	4132	X	154401236	154412112	deoxyribonuclease 1 like 1 [Source:HGNC Symbol;Acc:HGNC:2957]	923	877	572	567
ENSG00000013573	DDX11	8367	12	31073860	31104799	DEAD/H-box helicase 11 [Source:HGNC Symbol;Acc:HGNC:2736]	1377	1514	1591	1775
ENSG00000013583	HEBP1	3428	12	12974870	13000265	heme binding protein 1 [Source:HGNC Symbol;Acc:HGNC:17176]	716	758	820	693
ENSG00000013588	GPRC5A	7663	12	12891559	12917937	G protein-coupled receptor class C group 5 member A [Source:HGNC Symbol;Acc:HGNC:9836]	6529	6652	4222	3616
ENSG00000013619	MAMLD1	6664	X	150361422	150514178	mastermind like domain containing 1 [Source:HGNC Symbol;Acc:HGNC:2568]	482	445	582	456
ENSG00000013725	CD6	5958	11	60971680	61020377	CD6 molecule [Source:HGNC Symbol;Acc:HGNC:1691]	16	14	18	10
ENSG00000013810	TACC3	8825	4	1712858	1745171	transforming acidic coiled-coil containing protein 3 [Source:HGNC Symbol;Acc:HGNC:11524]	3399	3482	4073	3927
ENSG00000014123	UFL1	4539	6	96521595	96555276	UFM1 specific ligase 1 [Source:HGNC Symbol;Acc:HGNC:23039]	1917	2400	2142	1834
ENSG00000014138	POLA2	12006	11	65261913	65305959	DNA polymerase alpha 2, accessory subunit [Source:HGNC Symbol;Acc:HGNC:30073]	424	518	545	697
ENSG00000014164	ZC3H3	3721	8	143437659	143541447	zinc finger CCCH-type containing 3 [Source:HGNC Symbol;Acc:HGNC:28972]	1607	1306	1160	1223
ENSG00000014216	CAPN1	7506	11	65180566	65212006	calpain 1 [Source:HGNC Symbol;Acc:HGNC:1476]	30230	25552	24639	24942
ENSG00000014257	ACP3	4284	3	132317369	132368302	acid phosphatase 3 [Source:HGNC Symbol;Acc:HGNC:125]	167	198	166	109
ENSG00000014641	MDH1	4990	2	63588609	63607197	malate dehydrogenase 1 [Source:HGNC Symbol;Acc:HGNC:6970]	5016	6733	6032	5505
ENSG00000014824	SLC30A9	7199	4	41990502	42090461	solute carrier family 30 member 9 [Source:HGNC Symbol;Acc:HGNC:1329]	2534	2856	3068	2998
ENSG00000014914	MTMR11	4572	1	149928651	149936879	myotubularin related protein 11 [Source:HGNC Symbol;Acc:HGNC:24307]	322	393	299	330
ENSG00000014919	COX15	5215	10	99710868	99732127	cytochrome c oxidase assembly homolog COX15 [Source:HGNC Symbol;Acc:HGNC:2263]	877	943	866	683
ENSG00000015133	CCDC88C	12426	14	91271323	91417844	coiled-coil domain containing 88C [Source:HGNC Symbol;Acc:HGNC:19967]	1924	1392	1867	1966
ENSG00000015153	YAF2	10839	12	42157104	42238349	YY1 associated factor 2 [Source:HGNC Symbol;Acc:HGNC:17363]	499	638	607	535
ENSG00000015171	ZMYND11	12925	10	130088	254637	zinc finger MYND-type containing 11 [Source:HGNC Symbol;Acc:HGNC:16966]	4003	4607	5080	4926
ENSG00000015285	WAS	3402	X	48676596	48691431	WASP actin nucleation promoting factor [Source:HGNC Symbol;Acc:HGNC:12731]	27	25	24	29
ENSG00000015475	BID	4420	22	17734138	17774770	BH3 interacting domain death agonist [Source:HGNC Symbol;Acc:HGNC:1050]	3610	3983	3754	3412
ENSG00000015479	MATR3	12064	5	139293674	139331677	matrin 3 [Source:HGNC Symbol;Acc:HGNC:6912]	94	131	153	156
ENSG00000015520	NPC1L1	5267	7	44512535	44541330	NPC1 like intracellular cholesterol transporter 1 [Source:HGNC Symbol;Acc:HGNC:7898]	0	2	0	6
ENSG00000015532	XYLT2	5472	17	50346126	50363138	xylosyltransferase 2 [Source:HGNC Symbol;Acc:HGNC:15517]	1649	1524	1260	1246
ENSG00000015568	RGPD5	14185	2	109792758	109857705	RANBP2 like and GRIP domain containing 5 [Source:HGNC Symbol;Acc:HGNC:32418]	62	10	38	53
ENSG00000015592	STMN4	3309	8	27235308	27258420	stathmin 4 [Source:HGNC Symbol;Acc:HGNC:16078]	0	2	0	0
ENSG00000015676	NUDCD3	9893	7	44379119	44490658	NudC domain containing 3 [Source:HGNC Symbol;Acc:HGNC:22208]	6127	5536	2879	2885
ENSG00000016391	CHDH	7787	3	53812335	53846419	choline dehydrogenase [Source:HGNC Symbol;Acc:HGNC:24288]	512	530	710	654
ENSG00000016402	IL20RA	4730	6	136999971	137045180	interleukin 20 receptor subunit alpha [Source:HGNC Symbol;Acc:HGNC:6003]	478	530	949	1038
ENSG00000016864	GLT8D1	3785	3	52694486	52706032	glycosyltransferase 8 domain containing 1 [Source:HGNC Symbol;Acc:HGNC:24870]	610	721	852	722
ENSG00000017260	ATP2C1	8510	3	130850595	131016712	ATPase secretory pathway Ca2+ transporting 1 [Source:HGNC Symbol;Acc:HGNC:13211]	3545	3393	4519	4320
ENSG00000017483	SLC38A5	4017	X	48458537	48470260	solute carrier family 38 member 5 [Source:HGNC Symbol;Acc:HGNC:18070]	16	4	4	28
ENSG00000017797	RALBP1	8041	18	9475009	9538114	ralA binding protein 1 [Source:HGNC Symbol;Acc:HGNC:9841]	3380	3549	12638	12688
ENSG00000018189	RUFY3	9405	4	70704204	70808619	RUN and FYVE domain containing 3 [Source:HGNC Symbol;Acc:HGNC:30285]	1387	1334	1393	1393
ENSG00000018280	SLC11A1	8676	2	218382029	218396894	solute carrier family 11 member 1 [Source:HGNC Symbol;Acc:HGNC:10907]	2	14	15	12
ENSG00000018408	WWTR1	8353	3	149517235	149736714	WW domain containing transcription regulator 1 [Source:HGNC Symbol;Acc:HGNC:24042]	3251	3276	4083	3540
ENSG00000018510	AGPS	15223	2	177392746	177567024	alkylglycerone phosphate synthase [Source:HGNC Symbol;Acc:HGNC:327]	3102	3785	3953	3720
ENSG00000018610	STEEP1	2581	X	119538149	119565409	STING1 ER exit protein 1 [Source:HGNC Symbol;Acc:HGNC:26239]	1210	1218	1258	1312
ENSG00000018625	ATP1A2	6298	1	160115759	160143591	ATPase Na+/K+ transporting subunit alpha 2 [Source:HGNC Symbol;Acc:HGNC:800]	7	26	0	0
ENSG00000018699	TTC27	3443	2	32628032	32821051	tetratricopeptide repeat domain 27 [Source:HGNC Symbol;Acc:HGNC:25986]	1026	975	839	883
ENSG00000018869	ZNF582	3341	19	56375846	56393538	zinc finger protein 582 [Source:HGNC Symbol;Acc:HGNC:26421]	107	107	95	125
ENSG00000019102	VSIG2	1447	11	124747474	124752255	V-set and immunoglobulin domain containing 2 [Source:HGNC Symbol;Acc:HGNC:17149]	0	0	0	1
ENSG00000019144	PHLDB1	21691	11	118606440	118658031	pleckstrin homology like domain family B member 1 [Source:HGNC Symbol;Acc:HGNC:23697]	3222	2968	1915	1923
ENSG00000019169	MARCO	2051	2	118942194	118994660	macrophage receptor with collagenous structure [Source:HGNC Symbol;Acc:HGNC:6895]	10	18	8	9
ENSG00000019186	CYP24A1	3988	20	54153446	54173986	cytochrome P450 family 24 subfamily A member 1 [Source:HGNC Symbol;Acc:HGNC:2602]	17	29	16	25
ENSG00000019485	PRDM11	13976	11	45095806	45235110	PR/SET domain 11 [Source:HGNC Symbol;Acc:HGNC:13996]	69	47	74	93
ENSG00000019505	SYT13	5445	11	45240302	45286341	synaptotagmin 13 [Source:HGNC Symbol;Acc:HGNC:14962]	0	0	0	2
ENSG00000019582	CD74	4526	5	150401637	150412969	CD74 molecule [Source:HGNC Symbol;Acc:HGNC:1697]	4	6	6	17
ENSG00000019991	HGF	9753	7	81699010	81770438	hepatocyte growth factor [Source:HGNC Symbol;Acc:HGNC:4893]	0	4	0	0
ENSG00000019995	ZRANB1	5993	10	124942123	124988189	zinc finger RANBP2-type containing 1 [Source:HGNC Symbol;Acc:HGNC:18224]	1093	981	1068	1041
ENSG00000020129	NCDN	4917	1	35557473	35567274	neurochondrin [Source:HGNC Symbol;Acc:HGNC:17597]	3156	2770	2805	2676
ENSG00000020181	ADGRA2	7084	8	37784191	37844896	adhesion G protein-coupled receptor A2 [Source:HGNC Symbol;Acc:HGNC:17849]	128	171	213	168
ENSG00000020219	CCT8L1P	1674	7	152445477	152447150	chaperonin containing TCP1 subunit 8 like 1, pseudogene [Source:HGNC Symbol;Acc:HGNC:32153]	0	0	0	0
ENSG00000020256	ZFP64	6790	20	52051663	52204308	ZFP64 zinc finger protein [Source:HGNC Symbol;Acc:HGNC:15940]	1026	928	1215	1231
ENSG00000020426	MNAT1	3877	14	60734742	60969965	MNAT1 component of CDK activating kinase [Source:HGNC Symbol;Acc:HGNC:7181]	485	590	514	570
ENSG00000020577	SAMD4A	12333	14	54566117	54793315	sterile alpha motif domain containing 4A [Source:HGNC Symbol;Acc:HGNC:23023]	3506	3983	1629	1588
ENSG00000020633	RUNX3	4922	1	24899511	24965121	RUNX family transcription factor 3 [Source:HGNC Symbol;Acc:HGNC:10473]	2464	1978	2668	2775
ENSG00000020922	MRE11	7674	11	94415570	94493885	MRE11 homolog, double strand break repair nuclease [Source:HGNC Symbol;Acc:HGNC:7230]	856	981	1079	1206
ENSG00000021300	PLEKHB1	4933	11	73646178	73662819	pleckstrin homology domain containing B1 [Source:HGNC Symbol;Acc:HGNC:19079]	2	10	2	2
ENSG00000021355	SERPINB1	3047	6	2832332	2841959	serpin family B member 1 [Source:HGNC Symbol;Acc:HGNC:3311]	3701	3955	3975	3848
ENSG00000021488	SLC7A9	2598	19	32830509	32869767	solute carrier family 7 member 9 [Source:HGNC Symbol;Acc:HGNC:11067]	0	6	4	2
ENSG00000021574	SPAST	9488	2	32063556	32157637	spastin [Source:HGNC Symbol;Acc:HGNC:11233]	1853	2241	3109	3000
ENSG00000021645	NRXN3	15534	14	78170373	79868291	neurexin 3 [Source:HGNC Symbol;Acc:HGNC:8010]	1	1	0	0
ENSG00000021762	OSBPL5	7473	11	3087107	3166739	oxysterol binding protein like 5 [Source:HGNC Symbol;Acc:HGNC:16392]	2724	2579	1300	1288
ENSG00000021776	AQR	13431	15	34851782	34969742	aquarius intron-binding spliceosomal factor [Source:HGNC Symbol;Acc:HGNC:29513]	1934	2005	2311	2349
ENSG00000021826	CPS1	11018	2	210477682	210679107	carbamoyl-phosphate synthase 1 [Source:HGNC Symbol;Acc:HGNC:2323]	6	16	10	6
ENSG00000022267	FHL1	5862	X	136146702	136211359	four and a half LIM domains 1 [Source:HGNC Symbol;Acc:HGNC:3702]	37	50	56	45
ENSG00000022277	RTF2	4063	20	56468585	56519449	replication termination factor 2 [Source:HGNC Symbol;Acc:HGNC:15890]	2441	2537	2424	2239
ENSG00000022355	GABRA1	8420	5	161847063	161899981	gamma-aminobutyric acid type A receptor subunit alpha1 [Source:HGNC Symbol;Acc:HGNC:4075]	0	0	0	0
ENSG00000022556	NLRP2	6313	19	54953130	55001142	NLR family pyrin domain containing 2 [Source:HGNC Symbol;Acc:HGNC:22948]	6434	6308	4974	5052
ENSG00000022567	SLC45A4	8608	8	141207166	141308305	solute carrier family 45 member 4 [Source:HGNC Symbol;Acc:HGNC:29196]	1013	907	1391	1354
ENSG00000022840	RNF10	5900	12	120533480	120577588	ring finger protein 10 [Source:HGNC Symbol;Acc:HGNC:10055]	6887	6202	6773	6262
ENSG00000022976	ZNF839	5595	14	102317377	102342702	zinc finger protein 839 [Source:HGNC Symbol;Acc:HGNC:20345]	299	287	319	394
ENSG00000023041	ZDHHC6	9250	10	112424428	112447572	zinc finger DHHC-type palmitoyltransferase 6 [Source:HGNC Symbol;Acc:HGNC:19160]	1291	1659	1657	1513
ENSG00000023171	GRAMD1B	14932	11	123358428	123627774	GRAM domain containing 1B [Source:HGNC Symbol;Acc:HGNC:29214]	1812	1518	2182	1883
ENSG00000023191	RNH1	7374	11	494512	507300	ribonuclease/angiogenin inhibitor 1 [Source:HGNC Symbol;Acc:HGNC:10074]	5665	5226	5234	4662
ENSG00000023228	NDUFS1	12174	2	206114817	206159509	NADH:ubiquinone oxidoreductase core subunit S1 [Source:HGNC Symbol;Acc:HGNC:7707]	2891	3196	4201	4016
ENSG00000023287	RB1CC1	7613	8	52622458	52745843	RB1 inducible coiled-coil 1 [Source:HGNC Symbol;Acc:HGNC:15574]	3244	3169	4410	4266
ENSG00000023318	ERP44	14212	9	99979185	100099052	endoplasmic reticulum protein 44 [Source:HGNC Symbol;Acc:HGNC:18311]	1400	1352	1539	1401
ENSG00000023330	ALAS1	2536	3	52198086	52214327	5'-aminolevulinate synthase 1 [Source:HGNC Symbol;Acc:HGNC:396]	2007	2116	2059	2013
ENSG00000023445	BIRC3	7484	11	102317484	102339403	baculoviral IAP repeat containing 3 [Source:HGNC Symbol;Acc:HGNC:591]	3195	3972	3970	3779
ENSG00000023516	AKAP11	9915	13	42272152	42323261	A-kinase anchoring protein 11 [Source:HGNC Symbol;Acc:HGNC:369]	2329	2284	2527	2554
ENSG00000023572	GLRX2	6210	1	193090866	193106114	glutaredoxin 2 [Source:HGNC Symbol;Acc:HGNC:16065]	521	837	795	776
ENSG00000023608	SNAPC1	2593	14	61762420	61796428	small nuclear RNA activating complex polypeptide 1 [Source:HGNC Symbol;Acc:HGNC:11134]	289	349	197	167
ENSG00000023697	DERA	2813	12	15911302	16037381	deoxyribose-phosphate aldolase [Source:HGNC Symbol;Acc:HGNC:24269]	1152	1413	1052	1043
ENSG00000023734	STRAP	2215	12	15882387	15903478	serine/threonine kinase receptor associated protein [Source:HGNC Symbol;Acc:HGNC:30796]	6124	6883	7084	6400
ENSG00000023839	ABCC2	7837	10	99782640	99852594	ATP binding cassette subfamily C member 2 [Source:HGNC Symbol;Acc:HGNC:53]	545	633	382	399
ENSG00000023892	DEF6	5066	6	35297818	35321771	DEF6 guanine nucleotide exchange factor [Source:HGNC Symbol;Acc:HGNC:2760]	83	121	102	134
ENSG00000023902	PLEKHO1	6629	1	150149183	150164720	pleckstrin homology domain containing O1 [Source:HGNC Symbol;Acc:HGNC:24310]	161	106	214	281
ENSG00000023909	GCLM	5426	1	93885199	93909456	glutamate-cysteine ligase modifier subunit [Source:HGNC Symbol;Acc:HGNC:4312]	4443	4768	6234	5294
ENSG00000024048	UBR2	8874	6	42564029	42693505	ubiquitin protein ligase E3 component n-recognin 2 [Source:HGNC Symbol;Acc:HGNC:21289]	4451	3906	4125	4277
ENSG00000024422	EHD2	3844	19	47713422	47743134	EH domain containing 2 [Source:HGNC Symbol;Acc:HGNC:3243]	259	258	243	231
ENSG00000024526	DEPDC1	5904	1	68474152	68497221	DEP domain containing 1 [Source:HGNC Symbol;Acc:HGNC:22949]	1642	1919	3107	2805
ENSG00000024862	CCDC28A	1247	6	138773769	138793319	coiled-coil domain containing 28A [Source:HGNC Symbol;Acc:HGNC:21098]	360	413	455	408
ENSG00000025039	RRAGD	5095	6	89364616	89412273	Ras related GTP binding D [Source:HGNC Symbol;Acc:HGNC:19903]	1406	1490	2201	2123
ENSG00000025156	HSF2	2697	6	122399551	122433119	heat shock transcription factor 2 [Source:HGNC Symbol;Acc:HGNC:5225]	799	936	1004	925
ENSG00000025293	PHF20	8372	20	35771974	35950370	PHD finger protein 20 [Source:HGNC Symbol;Acc:HGNC:16098]	2345	2112	3014	3166
ENSG00000025423	HSD17B6	2272	12	56752161	56787790	hydroxysteroid 17-beta dehydrogenase 6 [Source:HGNC Symbol;Acc:HGNC:23316]	101	73	73	67
ENSG00000025434	NR1H3	4534	11	47248300	47269033	nuclear receptor subfamily 1 group H member 3 [Source:HGNC Symbol;Acc:HGNC:7966]	626	621	641	742
ENSG00000025708	TYMP	3600	22	50525752	50530032	thymidine phosphorylase [Source:HGNC Symbol;Acc:HGNC:3148]	206	228	209	188
ENSG00000025770	NCAPH2	4459	22	50508224	50524780	non-SMC condensin II complex subunit H2 [Source:HGNC Symbol;Acc:HGNC:25071]	3014	2438	2979	3045
ENSG00000025772	TOMM34	1973	20	44942130	44960397	translocase of outer mitochondrial membrane 34 [Source:HGNC Symbol;Acc:HGNC:15746]	732	796	1562	1477
ENSG00000025796	SEC63	8606	6	107867756	107958208	SEC63 homolog, protein translocation regulator [Source:HGNC Symbol;Acc:HGNC:21082]	6903	6376	9090	9223
ENSG00000025800	KPNA6	7457	1	32108056	32176563	karyopherin subunit alpha 6 [Source:HGNC Symbol;Acc:HGNC:6399]	7708	7187	6673	6633
ENSG00000026025	VIM	5176	10	17228241	17237593	vimentin [Source:HGNC Symbol;Acc:HGNC:12692]	39	40	22	22
ENSG00000026036	RTEL1-TNFRSF6B	9093	20	63659300	63698684	RTEL1-TNFRSF6B readthrough (NMD candidate) [Source:HGNC Symbol;Acc:HGNC:44095]	162	203	209	265
ENSG00000026103	FAS	29313	10	88953813	89029605	Fas cell surface death receptor [Source:HGNC Symbol;Acc:HGNC:11920]	63	86	164	95
ENSG00000026297	RNASET2	19532	6	166922113	166957191	ribonuclease T2 [Source:HGNC Symbol;Acc:HGNC:21686]	332	426	655	623
ENSG00000026508	CD44	9992	11	35138882	35232402	CD44 molecule (Indian blood group) [Source:HGNC Symbol;Acc:HGNC:1681]	34359	33816	38939	38739
ENSG00000026559	KCNG1	5415	20	51003656	51023107	potassium voltage-gated channel modifier subfamily G member 1 [Source:HGNC Symbol;Acc:HGNC:6248]	609	554	746	820
ENSG00000026652	AGPAT4	14253	6	161129967	161274061	1-acylglycerol-3-phosphate O-acyltransferase 4 [Source:HGNC Symbol;Acc:HGNC:20885]	29	30	11	26
ENSG00000026751	SLAMF7	4833	1	160739057	160754821	SLAM family member 7 [Source:HGNC Symbol;Acc:HGNC:21394]	28	43	36	16
ENSG00000026950	BTN3A1	5539	6	26402237	26415208	butyrophilin subfamily 3 member A1 [Source:HGNC Symbol;Acc:HGNC:1138]	782	920	1202	1256
ENSG00000027001	MIPEP	3388	13	23730189	23889400	mitochondrial intermediate peptidase [Source:HGNC Symbol;Acc:HGNC:7104]	376	430	888	770
ENSG00000027075	PRKCH	8947	14	61187559	61550976	protein kinase C eta [Source:HGNC Symbol;Acc:HGNC:9403]	1029	1157	1050	920
ENSG00000027644	INSRR	5200	1	156840063	156859117	insulin receptor related receptor [Source:HGNC Symbol;Acc:HGNC:6093]	4	0	2	4
ENSG00000027697	IFNGR1	3549	6	137197483	137219449	interferon gamma receptor 1 [Source:HGNC Symbol;Acc:HGNC:5439]	9363	12083	12485	10894
ENSG00000027847	B4GALT7	4878	5	177600132	177610330	beta-1,4-galactosyltransferase 7 [Source:HGNC Symbol;Acc:HGNC:930]	837	864	904	966
ENSG00000027869	SH2D2A	2498	1	156806243	156816848	SH2 domain containing 2A [Source:HGNC Symbol;Acc:HGNC:10821]	36	43	20	13
ENSG00000028116	VRK2	3531	2	57907629	58159920	VRK serine/threonine kinase 2 [Source:HGNC Symbol;Acc:HGNC:12719]	764	949	922	999
ENSG00000028137	TNFRSF1B	3778	1	12166991	12209228	TNF receptor superfamily member 1B [Source:HGNC Symbol;Acc:HGNC:11917]	9	0	10	18
ENSG00000028203	VEZT	8766	12	95217746	95302799	vezatin, adherens junctions transmembrane protein [Source:HGNC Symbol;Acc:HGNC:18258]	1421	1549	1579	1496
ENSG00000028277	POU2F2	9072	19	42086110	42196585	POU class 2 homeobox 2 [Source:HGNC Symbol;Acc:HGNC:9213]	58	62	46	75
ENSG00000028310	BRD9	9549	5	850291	892801	bromodomain containing 9 [Source:HGNC Symbol;Acc:HGNC:25818]	2800	3093	3399	3529
ENSG00000028528	SNX1	9789	15	64094123	64146090	sorting nexin 1 [Source:HGNC Symbol;Acc:HGNC:11172]	2223	2353	2161	2181
ENSG00000028839	TBPL1	5039	6	133952170	133990432	TATA-box binding protein like 1 [Source:HGNC Symbol;Acc:HGNC:11589]	341	477	546	464
ENSG00000029153	BMAL2	7001	12	27332836	27425289	basic helix-loop-helix ARNT like 2 [Source:HGNC Symbol;Acc:HGNC:18984]	1318	1283	764	972
ENSG00000029363	BCLAF1	9533	6	136256627	136289851	BCL2 associated transcription factor 1 [Source:HGNC Symbol;Acc:HGNC:16863]	6828	7973	9710	9441
ENSG00000029364	SLC39A9	7138	14	69398015	69462390	solute carrier family 39 member 9 [Source:HGNC Symbol;Acc:HGNC:20182]	2293	2460	2445	2336
ENSG00000029534	ANK1	10996	8	41653220	41896741	ankyrin 1 [Source:HGNC Symbol;Acc:HGNC:492]	79	64	98	78
ENSG00000029639	TFB1M	4111	6	155256134	155314493	transcription factor B1, mitochondrial [Source:HGNC Symbol;Acc:HGNC:17037]	174	283	238	202
ENSG00000029725	RABEP1	7059	17	5282265	5386340	rabaptin, RAB GTPase binding effector protein 1 [Source:HGNC Symbol;Acc:HGNC:17677]	1077	958	1577	1784
ENSG00000029993	HMGB3	3914	X	150980509	150990771	high mobility group box 3 [Source:HGNC Symbol;Acc:HGNC:5004]	2505	3051	5031	5078
ENSG00000030066	NUP160	8576	11	47778087	47848555	nucleoporin 160 [Source:HGNC Symbol;Acc:HGNC:18017]	3452	3522	4088	4049
ENSG00000030110	BAK1	2212	6	33572547	33580293	BCL2 antagonist/killer 1 [Source:HGNC Symbol;Acc:HGNC:949]	2198	2191	2309	2064
ENSG00000030304	MUSK	9176	9	110668779	110806558	muscle associated receptor tyrosine kinase [Source:HGNC Symbol;Acc:HGNC:7525]	2	4	2	0
ENSG00000030419	IKZF2	12243	2	212999691	213152427	IKAROS family zinc finger 2 [Source:HGNC Symbol;Acc:HGNC:13177]	554	538	510	429
ENSG00000030582	GRN	3524	17	44345246	44353106	granulin precursor [Source:HGNC Symbol;Acc:HGNC:4601]	5713	5774	5811	5004
ENSG00000031003	FAM13B	6808	5	137937960	138051961	family with sequence similarity 13 member B [Source:HGNC Symbol;Acc:HGNC:1335]	4537	4876	3923	3931
ENSG00000031081	ARHGAP31	9374	3	119294383	119420714	Rho GTPase activating protein 31 [Source:HGNC Symbol;Acc:HGNC:29216]	1218	1005	1011	1064
ENSG00000031691	CENPQ	1741	6	49463370	49493107	centromere protein Q [Source:HGNC Symbol;Acc:HGNC:21347]	481	585	526	532
ENSG00000031698	SARS1	3849	1	109213918	109238182	seryl-tRNA synthetase 1 [Source:HGNC Symbol;Acc:HGNC:10537]	4802	5076	4878	4328
ENSG00000031823	RANBP3	7445	19	5916139	5978142	RAN binding protein 3 [Source:HGNC Symbol;Acc:HGNC:9850]	2252	1958	1917	1940
ENSG00000032219	ARID4A	7449	14	58298504	58373887	AT-rich interaction domain 4A [Source:HGNC Symbol;Acc:HGNC:9885]	1377	1290	1479	1442
ENSG00000032389	EIPR1	5723	2	3188925	3377830	EARP complex and GARP complex interacting protein 1 [Source:HGNC Symbol;Acc:HGNC:12383]	1476	1458	1636	1424
ENSG00000032444	PNPLA6	7161	19	7534004	7561764	patatin like phospholipase domain containing 6 [Source:HGNC Symbol;Acc:HGNC:16268]	6396	4898	5441	5768
ENSG00000032742	IFT88	6049	13	20567138	20691444	intraflagellar transport 88 [Source:HGNC Symbol;Acc:HGNC:20606]	285	344	372	338
ENSG00000033011	ALG1	10637	16	5033702	5087379	ALG1 chitobiosyldiphosphodolichol beta-mannosyltransferase [Source:HGNC Symbol;Acc:HGNC:18294]	549	531	556	535
ENSG00000033030	ZCCHC8	8981	12	122471600	122500932	zinc finger CCHC-type containing 8 [Source:HGNC Symbol;Acc:HGNC:25265]	825	944	857	1060
ENSG00000033050	ABCF2	5158	7	151211484	151227205	ATP binding cassette subfamily F member 2 [Source:HGNC Symbol;Acc:HGNC:71]	862	905	1167	1194
ENSG00000033100	CHPF2	6498	7	151232483	151240979	chondroitin polymerizing factor 2 [Source:HGNC Symbol;Acc:HGNC:29270]	2215	2045	2408	2135
ENSG00000033122	LRRC7	30043	1	69567922	70151945	leucine rich repeat containing 7 [Source:HGNC Symbol;Acc:HGNC:18531]	22	13	25	49
ENSG00000033170	FUT8	6976	14	65410592	65744121	fucosyltransferase 8 [Source:HGNC Symbol;Acc:HGNC:4019]	364	326	660	743
ENSG00000033178	UBA6	11408	4	67612652	67701155	ubiquitin like modifier activating enzyme 6 [Source:HGNC Symbol;Acc:HGNC:25581]	2303	2367	3542	3402
ENSG00000033327	GAB2	6775	11	78215293	78418348	GRB2 associated binding protein 2 [Source:HGNC Symbol;Acc:HGNC:14458]	6540	5404	3634	3796
ENSG00000033627	ATP6V0A1	12938	17	42458844	42522582	ATPase H+ transporting V0 subunit a1 [Source:HGNC Symbol;Acc:HGNC:865]	2072	2103	1372	1591
ENSG00000033800	PIAS1	10647	15	68054309	68198603	protein inhibitor of activated STAT 1 [Source:HGNC Symbol;Acc:HGNC:2752]	1306	1202	1304	1312
ENSG00000033867	SLC4A7	9616	3	27372721	27484420	solute carrier family 4 member 7 [Source:HGNC Symbol;Acc:HGNC:11033]	1603	1792	2018	1954
ENSG00000034152	MAP2K3	3775	17	21284672	21315232	mitogen-activated protein kinase kinase 3 [Source:HGNC Symbol;Acc:HGNC:6843]	1958	1883	1935	1790
ENSG00000034510	TMSB10	461	2	84905656	84906671	thymosin beta 10 [Source:HGNC Symbol;Acc:HGNC:11879]	10930	14662	7332	6240
ENSG00000034533	ASTE1	3427	3	131013875	131027649	asteroid homolog 1 [Source:HGNC Symbol;Acc:HGNC:25021]	136	175	172	200
ENSG00000034677	RNF19A	5852	8	100257060	100336218	ring finger protein 19A, RBR E3 ubiquitin protein ligase [Source:HGNC Symbol;Acc:HGNC:13432]	2782	2922	2605	2431
ENSG00000034693	PEX3	2830	6	143450805	143490616	peroxisomal biogenesis factor 3 [Source:HGNC Symbol;Acc:HGNC:8858]	439	552	674	533
ENSG00000034713	GABARAPL2	3010	16	75566375	75577881	GABA type A receptor associated protein like 2 [Source:HGNC Symbol;Acc:HGNC:13291]	1431	1927	1644	1480
ENSG00000035115	SH3YL1	11132	2	217730	266398	SH3 and SYLF domain containing 1 [Source:HGNC Symbol;Acc:HGNC:29546]	1713	2049	2029	1884
ENSG00000035141	FAM136A	3062	2	70295976	70302067	family with sequence similarity 136 member A [Source:HGNC Symbol;Acc:HGNC:25911]	3918	4503	3045	3205
ENSG00000035403	VCL	9992	10	73995193	74121363	vinculin [Source:HGNC Symbol;Acc:HGNC:12665]	26009	24279	15526	15456
ENSG00000035499	DEPDC1B	3806	5	60596912	60700190	DEP domain containing 1B [Source:HGNC Symbol;Acc:HGNC:24902]	363	449	752	610
ENSG00000035664	DAPK2	13661	15	63907036	64072033	death associated protein kinase 2 [Source:HGNC Symbol;Acc:HGNC:2675]	80	53	52	140
ENSG00000035681	NSMAF	6170	8	58583508	58659853	neutral sphingomyelinase activation associated factor [Source:HGNC Symbol;Acc:HGNC:8017]	788	928	1062	1086
ENSG00000035687	ADSS2	3441	1	244408494	244451909	adenylosuccinate synthase 2 [Source:HGNC Symbol;Acc:HGNC:292]	2747	3248	3544	3291
ENSG00000035720	STAP1	1951	4	67558727	67607337	signal transducing adaptor family member 1 [Source:HGNC Symbol;Acc:HGNC:24133]	0	0	0	0
ENSG00000035862	TIMP2	6209	17	78852977	78925387	TIMP metallopeptidase inhibitor 2 [Source:HGNC Symbol;Acc:HGNC:11821]	1447	1497	1321	1285
ENSG00000035928	RFC1	6713	4	39287456	39366375	replication factor C subunit 1 [Source:HGNC Symbol;Acc:HGNC:9969]	3158	3086	3446	3618
ENSG00000036054	TBC1D23	5176	3	100260992	100325251	TBC1 domain family member 23 [Source:HGNC Symbol;Acc:HGNC:25622]	1628	1914	1876	1759
ENSG00000036257	CUL3	11505	2	224470150	224585397	cullin 3 [Source:HGNC Symbol;Acc:HGNC:2553]	2836	2938	3645	4010
ENSG00000036530	CYP46A1	9358	14	99684298	99727301	cytochrome P450 family 46 subfamily A member 1 [Source:HGNC Symbol;Acc:HGNC:2641]	0	0	8	3
ENSG00000036549	ZZZ3	9008	1	77562416	77683419	zinc finger ZZ-type containing 3 [Source:HGNC Symbol;Acc:HGNC:24523]	3186	3271	4263	3820
ENSG00000036672	USP2	4523	11	119355215	119381711	ubiquitin specific peptidase 2 [Source:HGNC Symbol;Acc:HGNC:12618]	350	310	383	353
ENSG00000037042	TUBG2	2793	17	42659284	42667006	tubulin gamma 2 [Source:HGNC Symbol;Acc:HGNC:12419]	424	650	581	662
ENSG00000037241	RPL26L1	1164	5	172958729	172969771	ribosomal protein L26 like 1 [Source:HGNC Symbol;Acc:HGNC:17050]	807	890	590	518
ENSG00000037474	NSUN2	5506	5	6599239	6633291	NOP2/Sun RNA methyltransferase 2 [Source:HGNC Symbol;Acc:HGNC:25994]	6996	7430	9077	8662
ENSG00000037637	FBXO42	9009	1	16246840	16352480	F-box protein 42 [Source:HGNC Symbol;Acc:HGNC:29249]	1061	1073	891	936
ENSG00000037749	MFAP3	10159	5	154038959	154220478	microfibril associated protein 3 [Source:HGNC Symbol;Acc:HGNC:7034]	1677	1895	2621	2316
ENSG00000037757	MRI1	3466	19	13764522	13774282	methylthioribose-1-phosphate isomerase 1 [Source:HGNC Symbol;Acc:HGNC:28469]	1552	1430	1671	1767
ENSG00000037897	METTL1	1947	12	57768471	57772119	methyltransferase 1, tRNA methylguanosine [Source:HGNC Symbol;Acc:HGNC:7030]	124	175	179	192
ENSG00000037965	HOXC8	2417	12	54008985	54012769	homeobox C8 [Source:HGNC Symbol;Acc:HGNC:5129]	18	30	26	6
ENSG00000038002	AGA	2605	4	177430774	177442437	aspartylglucosaminidase [Source:HGNC Symbol;Acc:HGNC:318]	1027	1229	995	942
ENSG00000038210	PI4K2B	3685	4	25160663	25279204	phosphatidylinositol 4-kinase type 2 beta [Source:HGNC Symbol;Acc:HGNC:18215]	1682	1925	2176	2081
ENSG00000038219	BOD1L1	15862	4	13568738	13627725	biorientation of chromosomes in cell division 1 like 1 [Source:HGNC Symbol;Acc:HGNC:31792]	2773	2806	3322	2835
ENSG00000038274	MAT2B	8700	5	163503114	163519558	methionine adenosyltransferase 2B [Source:HGNC Symbol;Acc:HGNC:6905]	3326	4048	3692	3428
ENSG00000038295	TLL1	8105	4	165873237	166104457	tolloid like 1 [Source:HGNC Symbol;Acc:HGNC:11843]	0	0	0	0
ENSG00000038358	EDC4	6140	16	67873052	67884499	enhancer of mRNA decapping 4 [Source:HGNC Symbol;Acc:HGNC:17157]	3301	2944	2878	3081
ENSG00000038382	TRIO	19917	5	14143342	14532128	trio Rho guanine nucleotide exchange factor [Source:HGNC Symbol;Acc:HGNC:12303]	10875	9952	10162	8142
ENSG00000038427	VCAN	14678	5	83471618	83582303	versican [Source:HGNC Symbol;Acc:HGNC:2464]	0	0	0	0
ENSG00000038532	CLEC16A	12548	16	10944539	11182186	C-type lectin domain containing 16A [Source:HGNC Symbol;Acc:HGNC:29013]	1752	1553	1758	1637
ENSG00000039068	CDH1	6076	16	68737292	68835537	cadherin 1 [Source:HGNC Symbol;Acc:HGNC:1748]	6006	5749	4810	4605
ENSG00000039123	MTREX	6347	5	55307989	55425579	Mtr4 exosome RNA helicase [Source:HGNC Symbol;Acc:HGNC:18734]	1918	1958	2913	2914
ENSG00000039139	DNAH5	24848	5	13690328	14011818	dynein axonemal heavy chain 5 [Source:HGNC Symbol;Acc:HGNC:2950]	386	475	310	380
ENSG00000039319	ZFYVE16	15490	5	80408013	80483379	zinc finger FYVE-type containing 16 [Source:HGNC Symbol;Acc:HGNC:20756]	2334	2464	2957	2816
ENSG00000039523	RIPOR1	6729	16	67518418	67546788	RHO family interacting cell polarization regulator 1 [Source:HGNC Symbol;Acc:HGNC:25836]	1898	1738	1400	1430
ENSG00000039537	C6	6900	5	41142116	41261438	complement C6 [Source:HGNC Symbol;Acc:HGNC:1339]	0	0	0	2
ENSG00000039560	RAI14	7581	5	34656328	34832612	retinoic acid induced 14 [Source:HGNC Symbol;Acc:HGNC:14873]	2427	2170	4079	4171
ENSG00000039600	SOX30	3489	5	157625679	157671480	SRY-box transcription factor 30 [Source:HGNC Symbol;Acc:HGNC:30635]	0	0	0	0
ENSG00000039650	PNKP	4545	19	49859882	49878351	polynucleotide kinase 3'-phosphatase [Source:HGNC Symbol;Acc:HGNC:9154]	459	585	1512	1664
ENSG00000039987	BEST2	2646	19	12751702	12758458	bestrophin 2 [Source:HGNC Symbol;Acc:HGNC:17107]	0	2	7	18
ENSG00000040199	PHLPP2	12493	16	71637835	71724701	PH domain and leucine rich repeat protein phosphatase 2 [Source:HGNC Symbol;Acc:HGNC:29149]	1458	1446	1453	1318
ENSG00000040275	SPDL1	4775	5	169583636	169604778	spindle apparatus coiled-coil protein 1 [Source:HGNC Symbol;Acc:HGNC:26010]	1905	2489	2773	2753
ENSG00000040341	STAU2	8964	8	73420369	73747708	staufen double-stranded RNA binding protein 2 [Source:HGNC Symbol;Acc:HGNC:11371]	1391	1437	1762	1777
ENSG00000040487	SLC66A1	2686	1	19312326	19329300	solute carrier family 66 member 1 [Source:HGNC Symbol;Acc:HGNC:26001]	686	661	513	446
ENSG00000040531	CTNS	4949	17	3636459	3663103	cystinosin, lysosomal cystine transporter [Source:HGNC Symbol;Acc:HGNC:2518]	650	754	697	593
ENSG00000040608	RTN4R	3126	22	20241415	20283246	reticulon 4 receptor [Source:HGNC Symbol;Acc:HGNC:18601]	604	633	594	541
ENSG00000040633	PHF23	2733	17	7235029	7239722	PHD finger protein 23 [Source:HGNC Symbol;Acc:HGNC:28428]	989	1056	1476	1374
ENSG00000040933	INPP4A	13556	2	98444854	98594392	inositol polyphosphate-4-phosphatase type I A [Source:HGNC Symbol;Acc:HGNC:6074]	2353	2107	2199	2058
ENSG00000041353	RAB27B	7154	18	54717860	54895516	RAB27B, member RAS oncogene family [Source:HGNC Symbol;Acc:HGNC:9767]	936	1138	1789	1610
ENSG00000041357	PSMA4	6994	15	78540405	78552417	proteasome 20S subunit alpha 4 [Source:HGNC Symbol;Acc:HGNC:9533]	3037	3837	3804	3850
ENSG00000041515	MYO16	8816	13	108596152	109208005	myosin XVI [Source:HGNC Symbol;Acc:HGNC:29822]	9	18	3	6
ENSG00000041802	LSG1	4801	3	194640791	194672463	large 60S subunit nuclear export GTPase 1 [Source:HGNC Symbol;Acc:HGNC:25652]	1861	1811	1510	1649
ENSG00000041880	PARP3	3198	3	51942345	51948867	poly(ADP-ribose) polymerase family member 3 [Source:HGNC Symbol;Acc:HGNC:273]	746	744	807	905
ENSG00000041982	TNC	9589	9	115019575	115118207	tenascin C [Source:HGNC Symbol;Acc:HGNC:5318]	3796	3322	1497	1435
ENSG00000041988	THAP3	4067	1	6624868	6635586	THAP domain containing 3 [Source:HGNC Symbol;Acc:HGNC:20855]	220	195	230	233
ENSG00000042062	RIPOR3	6023	20	50586108	50691542	RIPOR family member 3 [Source:HGNC Symbol;Acc:HGNC:16168]	89	55	126	198
ENSG00000042088	TDP1	6223	14	89954939	90044764	tyrosyl-DNA phosphodiesterase 1 [Source:HGNC Symbol;Acc:HGNC:18884]	940	1049	1207	1162
ENSG00000042286	AIFM2	5135	10	70098223	70132934	apoptosis inducing factor mitochondria associated 2 [Source:HGNC Symbol;Acc:HGNC:21411]	873	893	672	705
ENSG00000042317	SPATA7	6872	14	88384924	88470350	spermatogenesis associated 7 [Source:HGNC Symbol;Acc:HGNC:20423]	50	82	71	116
ENSG00000042429	MED17	16610	11	93784227	93814963	mediator complex subunit 17 [Source:HGNC Symbol;Acc:HGNC:2375]	102	82	107	112
ENSG00000042445	RETSAT	4049	2	85341955	85354531	retinol saturase [Source:HGNC Symbol;Acc:HGNC:25991]	3683	3464	2274	2322
ENSG00000042493	CAPG	2419	2	85394753	85418432	capping actin protein, gelsolin like [Source:HGNC Symbol;Acc:HGNC:1474]	2167	2331	1577	1389
ENSG00000042753	AP2S1	1558	19	46838136	46850846	adaptor related protein complex 2 subunit sigma 1 [Source:HGNC Symbol;Acc:HGNC:565]	3756	4599	4254	3691
ENSG00000042781	USH2A	20633	1	215622891	216423448	usherin [Source:HGNC Symbol;Acc:HGNC:12601]	6	8	2	0
ENSG00000042832	TG	11132	8	132866958	133134903	thyroglobulin [Source:HGNC Symbol;Acc:HGNC:11764]	8	0	0	0
ENSG00000042980	ADAM28	9381	8	24294069	24359014	ADAM metallopeptidase domain 28 [Source:HGNC Symbol;Acc:HGNC:206]	96	107	40	54
ENSG00000043039	BARX2	3752	11	129375848	129452279	BARX homeobox 2 [Source:HGNC Symbol;Acc:HGNC:956]	1302	1400	1784	1377
ENSG00000043093	DCUN1D1	8307	3	182938074	182985953	defective in cullin neddylation 1 domain containing 1 [Source:HGNC Symbol;Acc:HGNC:18184]	1195	1336	1828	1742
ENSG00000043143	JADE2	11091	5	134524312	134583230	jade family PHD finger 2 [Source:HGNC Symbol;Acc:HGNC:22984]	3311	2648	3757	4082
ENSG00000043355	ZIC2	3290	13	99981784	99986765	Zic family member 2 [Source:HGNC Symbol;Acc:HGNC:12873]	585	455	896	896
ENSG00000043462	LCP2	6823	5	170246233	170297815	lymphocyte cytosolic protein 2 [Source:HGNC Symbol;Acc:HGNC:6529]	0	0	0	0
ENSG00000043514	TRIT1	6533	1	39838110	39883511	tRNA isopentenyltransferase 1 [Source:HGNC Symbol;Acc:HGNC:20286]	1055	1131	1237	1142
ENSG00000043591	ADRB1	3039	10	114043866	114046904	adrenoceptor beta 1 [Source:HGNC Symbol;Acc:HGNC:285]	357	244	215	250
ENSG00000044012	GUCA2B	604	1	42153410	42155820	guanylate cyclase activator 2B [Source:HGNC Symbol;Acc:HGNC:4683]	0	0	0	0
ENSG00000044090	CUL7	7873	6	43037617	43053943	cullin 7 [Source:HGNC Symbol;Acc:HGNC:21024]	1348	1178	1306	1345
ENSG00000044115	CTNNA1	8830	5	138610967	138935034	catenin alpha 1 [Source:HGNC Symbol;Acc:HGNC:2509]	3260	3278	3644	3332
ENSG00000044446	PHKA2	8547	X	18892298	18984114	phosphorylase kinase regulatory subunit alpha 2 [Source:HGNC Symbol;Acc:HGNC:8926]	1299	1134	1614	1589
ENSG00000044459	CNTLN	11064	9	17134982	17503923	centlein [Source:HGNC Symbol;Acc:HGNC:23432]	540	504	586	476
ENSG00000044574	HSPA5	6530	9	125234853	125241382	heat shock protein family A (Hsp70) member 5 [Source:HGNC Symbol;Acc:HGNC:5238]	8274	8588	13203	12818
ENSG00000046604	DSG2	9492	18	31498177	31549008	desmoglein 2 [Source:HGNC Symbol;Acc:HGNC:3049]	5135	5808	4299	3527
ENSG00000046647	GEMIN8	4001	X	14006726	14029893	gem nuclear organelle associated protein 8 [Source:HGNC Symbol;Acc:HGNC:26044]	364	402	447	373
ENSG00000046651	OFD1	15550	X	13734743	13777955	OFD1 centriole and centriolar satellite protein [Source:HGNC Symbol;Acc:HGNC:2567]	754	992	1396	1472
ENSG00000046653	GPM6B	5767	X	13770939	13938638	glycoprotein M6B [Source:HGNC Symbol;Acc:HGNC:4461]	18	24	44	45
ENSG00000046774	MAGEC2	1994	X	142202342	142205290	MAGE family member C2 [Source:HGNC Symbol;Acc:HGNC:13574]	63	55	30	34
ENSG00000046889	PREX2	12132	8	67952046	68237032	phosphatidylinositol-3,4,5-trisphosphate dependent Rac exchange factor 2 [Source:HGNC Symbol;Acc:HGNC:22950]	0	0	0	0
ENSG00000047056	WDR37	8029	10	1049538	1160991	WD repeat domain 37 [Source:HGNC Symbol;Acc:HGNC:31406]	1752	1603	1304	1223
ENSG00000047188	YTHDC2	10805	5	113513694	113595285	YTH domain containing 2 [Source:HGNC Symbol;Acc:HGNC:24721]	2283	2472	2046	1966
ENSG00000047230	CTPS2	5531	X	16587999	16712936	CTP synthase 2 [Source:HGNC Symbol;Acc:HGNC:2520]	1338	1335	1027	1122
ENSG00000047249	ATP6V1H	5104	8	53715543	53843558	ATPase H+ transporting V1 subunit H [Source:HGNC Symbol;Acc:HGNC:18303]	1621	1480	1566	1441
ENSG00000047315	POLR2B	5891	4	56977722	57031158	RNA polymerase II subunit B [Source:HGNC Symbol;Acc:HGNC:9188]	4955	5366	5472	5279
ENSG00000047346	ATOSA	9848	15	52581317	52709817	atos homolog A [Source:HGNC Symbol;Acc:HGNC:25609]	525	579	696	634
ENSG00000047365	ARAP2	12427	4	35948221	36244514	ArfGAP with RhoGAP domain, ankyrin repeat and PH domain 2 [Source:HGNC Symbol;Acc:HGNC:16924]	493	617	991	1004
ENSG00000047410	TPR	12350	1	186311652	186375693	translocated promoter region, nuclear basket protein [Source:HGNC Symbol;Acc:HGNC:12017]	10064	9742	11926	12391
ENSG00000047457	CP	7072	3	149162410	149221829	ceruloplasmin [Source:HGNC Symbol;Acc:HGNC:2295]	948	957	1148	1250
ENSG00000047578	KATNIP	9759	16	27550133	27780344	katanin interacting protein [Source:HGNC Symbol;Acc:HGNC:29068]	1097	958	811	862
ENSG00000047579	DTNBP1	3046	6	15522807	15663058	dystrobrevin binding protein 1 [Source:HGNC Symbol;Acc:HGNC:17328]	1188	1146	1437	1302
ENSG00000047597	XK	5174	X	37685791	37732130	X-linked Kx blood group antigen, Kell and VPS13A binding protein [Source:HGNC Symbol;Acc:HGNC:12811]	59	66	41	43
ENSG00000047621	C12orf4	4932	12	4487735	4538508	chromosome 12 open reading frame 4 [Source:HGNC Symbol;Acc:HGNC:1184]	811	764	821	828
ENSG00000047634	SCML1	5497	X	17737449	17754988	Scm polycomb group protein like 1 [Source:HGNC Symbol;Acc:HGNC:10580]	765	1305	1035	1031
ENSG00000047644	WWC3	7416	X	10015254	10144474	WWC family member 3 [Source:HGNC Symbol;Acc:HGNC:29237]	4979	4073	5862	5600
ENSG00000047648	ARHGAP6	8893	X	11117651	11665920	Rho GTPase activating protein 6 [Source:HGNC Symbol;Acc:HGNC:676]	21	4	10	18
ENSG00000047662	FAM184B	6731	4	17629306	17781621	family with sequence similarity 184 member B [Source:HGNC Symbol;Acc:HGNC:29235]	9	5	8	10
ENSG00000047849	MAP4	14994	3	47850690	48089272	microtubule associated protein 4 [Source:HGNC Symbol;Acc:HGNC:6862]	11180	9401	7459	7541
ENSG00000047932	GOPC	4628	6	117560269	117602542	golgi associated PDZ and coiled-coil motif containing [Source:HGNC Symbol;Acc:HGNC:17643]	3024	3631	3791	3272
ENSG00000047936	ROS1	8890	6	117287353	117425942	ROS proto-oncogene 1, receptor tyrosine kinase [Source:HGNC Symbol;Acc:HGNC:10261]	926	856	248	211
ENSG00000048028	USP28	5793	11	113797874	113875572	ubiquitin specific peptidase 28 [Source:HGNC Symbol;Acc:HGNC:12625]	2679	2897	3048	3074
ENSG00000048052	HDAC9	17284	7	18086949	19002416	histone deacetylase 9 [Source:HGNC Symbol;Acc:HGNC:14065]	2224	2185	1271	917
ENSG00000048140	TSPAN17	5215	5	176647387	176659054	tetraspanin 17 [Source:HGNC Symbol;Acc:HGNC:13594]	6208	6019	5543	5606
ENSG00000048162	NOP16	2806	5	176383946	176388927	NOP16 nucleolar protein [Source:HGNC Symbol;Acc:HGNC:26934]	888	1235	1021	916
ENSG00000048342	CC2D2A	14588	4	15469865	15601552	coiled-coil and C2 domain containing 2A [Source:HGNC Symbol;Acc:HGNC:29253]	66	40	32	42
ENSG00000048392	RRM2B	5391	8	102204502	102238961	ribonucleotide reductase regulatory TP53 inducible subunit M2B [Source:HGNC Symbol;Acc:HGNC:17296]	338	336	1070	980
ENSG00000048405	ZNF800	5793	7	127346790	127431924	zinc finger protein 800 [Source:HGNC Symbol;Acc:HGNC:27267]	1003	955	1507	1391
ENSG00000048462	TNFRSF17	1015	16	11965210	11968068	TNF receptor superfamily member 17 [Source:HGNC Symbol;Acc:HGNC:11913]	0	0	0	0
ENSG00000048471	SNX29	11299	16	11976734	12574287	sorting nexin 29 [Source:HGNC Symbol;Acc:HGNC:30542]	338	300	297	259
ENSG00000048540	LMO3	10002	12	16548372	16610594	LIM domain only 3 [Source:HGNC Symbol;Acc:HGNC:6643]	0	8	4	0
ENSG00000048544	MRPS10	2100	6	42206807	42217861	mitochondrial ribosomal protein S10 [Source:HGNC Symbol;Acc:HGNC:14502]	1890	2186	2331	2238
ENSG00000048649	RSF1	15579	11	77660009	77820869	remodeling and spacing factor 1 [Source:HGNC Symbol;Acc:HGNC:18118]	3950	3639	4371	4088
ENSG00000048707	VPS13D	20768	1	12230030	12512047	vacuolar protein sorting 13 homolog D [Source:HGNC Symbol;Acc:HGNC:23595]	3288	2855	3080	2592
ENSG00000048740	CELF2	11029	10	10798397	11336675	CUGBP Elav-like family member 2 [Source:HGNC Symbol;Acc:HGNC:2550]	72	79	105	99
ENSG00000048828	FAM120A	7246	9	93451685	93566112	family with sequence similarity 120A [Source:HGNC Symbol;Acc:HGNC:13247]	6985	6601	8092	7486
ENSG00000048991	R3HDM1	7892	2	135531455	135725270	R3H domain containing 1 [Source:HGNC Symbol;Acc:HGNC:9757]	4234	3762	4900	5067
ENSG00000049089	COL9A2	4215	1	40300489	40317813	collagen type IX alpha 2 chain [Source:HGNC Symbol;Acc:HGNC:2218]	460	333	239	222
ENSG00000049130	KITLG	6205	12	88492793	88580851	KIT ligand [Source:HGNC Symbol;Acc:HGNC:6343]	7707	9327	6362	5967
ENSG00000049167	ERCC8	26458	5	60866454	60945073	ERCC excision repair 8, CSA ubiquitin ligase complex subunit [Source:HGNC Symbol;Acc:HGNC:3439]	300	326	377	325
ENSG00000049192	ADAMTS6	8565	5	65148738	65481920	ADAM metallopeptidase with thrombospondin type 1 motif 6 [Source:HGNC Symbol;Acc:HGNC:222]	0	0	0	0
ENSG00000049239	H6PD	9322	1	9234774	9271337	hexose-6-phosphate dehydrogenase/glucose 1-dehydrogenase [Source:HGNC Symbol;Acc:HGNC:4795]	2964	2343	2595	2617
ENSG00000049245	VAMP3	2733	1	7771296	7781432	vesicle associated membrane protein 3 [Source:HGNC Symbol;Acc:HGNC:12644]	2978	3221	3004	2676
ENSG00000049246	PER3	8128	1	7784291	7845177	period circadian regulator 3 [Source:HGNC Symbol;Acc:HGNC:8847]	1068	1078	1628	1584
ENSG00000049249	TNFRSF9	6354	1	7915871	7943165	TNF receptor superfamily member 9 [Source:HGNC Symbol;Acc:HGNC:11924]	0	6	0	0
ENSG00000049283	EPN3	4503	17	50532682	50543750	epsin 3 [Source:HGNC Symbol;Acc:HGNC:18235]	923	723	1414	1155
ENSG00000049323	LTBP1	7348	2	32946953	33399509	latent transforming growth factor beta binding protein 1 [Source:HGNC Symbol;Acc:HGNC:6714]	1834	1635	1492	1372
ENSG00000049449	RCN1	4472	11	32091074	32105722	reticulocalbin 1 [Source:HGNC Symbol;Acc:HGNC:9934]	3414	4018	4091	4003
ENSG00000049540	ELN	6572	7	74027789	74069907	elastin [Source:HGNC Symbol;Acc:HGNC:3327]	2	0	2	2
ENSG00000049541	RFC2	2211	7	74231499	74254458	replication factor C subunit 2 [Source:HGNC Symbol;Acc:HGNC:9970]	1902	1706	1703	1646
ENSG00000049618	ARID1B	45931	6	156776020	157210779	AT-rich interaction domain 1B [Source:HGNC Symbol;Acc:HGNC:18040]	5900	4885	5443	5460
ENSG00000049656	CLPTM1L	6549	5	1317752	1345099	CLPTM1 like [Source:HGNC Symbol;Acc:HGNC:24308]	13064	13241	13224	13902
ENSG00000049759	NEDD4L	34097	18	58044226	58401540	NEDD4 like E3 ubiquitin protein ligase [Source:HGNC Symbol;Acc:HGNC:7728]	2632	2372	1870	1696
ENSG00000049768	FOXP3	2619	X	49250438	49264800	forkhead box P3 [Source:HGNC Symbol;Acc:HGNC:6106]	11	6	12	12
ENSG00000049769	PPP1R3F	4378	X	49269793	49301461	protein phosphatase 1 regulatory subunit 3F [Source:HGNC Symbol;Acc:HGNC:14944]	107	185	202	157
ENSG00000049860	HEXB	5015	5	74640023	74722647	hexosaminidase subunit beta [Source:HGNC Symbol;Acc:HGNC:4879]	3014	3232	2995	2993
ENSG00000049883	PTCD2	12115	5	72320367	72368395	pentatricopeptide repeat domain 2 [Source:HGNC Symbol;Acc:HGNC:25734]	318	334	503	482
ENSG00000050030	NEXMIF	12338	X	74732856	74925472	neurite extension and migration factor [Source:HGNC Symbol;Acc:HGNC:29433]	0	0	0	0
ENSG00000050130	JKAMP	4350	14	59484443	59505410	JNK1/MAPK8 associated membrane protein [Source:HGNC Symbol;Acc:HGNC:20184]	1350	1788	2346	2240
ENSG00000050165	DKK3	11958	11	11956207	12009769	dickkopf WNT signaling pathway inhibitor 3 [Source:HGNC Symbol;Acc:HGNC:2893]	0	2	0	0
ENSG00000050327	ARHGEF5	5818	7	144355288	144380632	Rho guanine nucleotide exchange factor 5 [Source:HGNC Symbol;Acc:HGNC:13209]	2852	2376	2022	2076
ENSG00000050344	NFE2L3	4303	7	26152198	26187137	NFE2 like bZIP transcription factor 3 [Source:HGNC Symbol;Acc:HGNC:7783]	906	968	1519	1428
ENSG00000050393	MCUR1	6057	6	13786557	13814568	mitochondrial calcium uniporter regulator 1 [Source:HGNC Symbol;Acc:HGNC:21097]	6901	6935	7615	7712
ENSG00000050405	LIMA1	6291	12	50175788	50283520	LIM domain and actin binding 1 [Source:HGNC Symbol;Acc:HGNC:24636]	4144	4234	2817	2788
ENSG00000050426	LETMD1	6032	12	51047962	51060424	LETM1 domain containing 1 [Source:HGNC Symbol;Acc:HGNC:24241]	986	1115	1227	1230
ENSG00000050438	SLC4A8	17920	12	51391317	51515763	solute carrier family 4 member 8 [Source:HGNC Symbol;Acc:HGNC:11034]	248	285	252	210
ENSG00000050555	LAMC3	8939	9	131009174	131094473	laminin subunit gamma 3 [Source:HGNC Symbol;Acc:HGNC:6494]	2	9	4	9
ENSG00000050628	PTGER3	10287	1	70852353	71047816	prostaglandin E receptor 3 [Source:HGNC Symbol;Acc:HGNC:9595]	360	423	230	132
ENSG00000050730	TNIP3	3749	4	121131408	121227466	TNFAIP3 interacting protein 3 [Source:HGNC Symbol;Acc:HGNC:19315]	34	35	25	31
ENSG00000050748	MAPK9	8955	5	180233143	180292099	mitogen-activated protein kinase 9 [Source:HGNC Symbol;Acc:HGNC:6886]	5786	5573	6924	6868
ENSG00000050767	COL23A1	4359	5	178237476	178590393	collagen type XXIII alpha 1 chain [Source:HGNC Symbol;Acc:HGNC:22990]	86	87	70	58
ENSG00000050820	BCAR1	9199	16	75228181	75268053	BCAR1 scaffold protein, Cas family member [Source:HGNC Symbol;Acc:HGNC:971]	7349	6192	5350	4825
ENSG00000051009	FHIP1B	4726	11	6211345	6234711	FHF complex subunit HOOK interacting protein 1B [Source:HGNC Symbol;Acc:HGNC:25378]	1378	997	1225	1171
ENSG00000051108	HERPUD1	5062	16	56932142	56944864	homocysteine inducible ER protein with ubiquitin like domain 1 [Source:HGNC Symbol;Acc:HGNC:13744]	1904	1944	1684	1758
ENSG00000051128	HOMER3	3422	19	18929201	18941261	homer scaffold protein 3 [Source:HGNC Symbol;Acc:HGNC:17514]	2753	2997	3713	3820
ENSG00000051180	RAD51	3084	15	40694774	40732340	RAD51 recombinase [Source:HGNC Symbol;Acc:HGNC:9817]	566	688	833	659
ENSG00000051341	POLQ	9185	3	121431431	121545988	DNA polymerase theta [Source:HGNC Symbol;Acc:HGNC:9186]	916	841	1498	1377
ENSG00000051382	PIK3CB	7841	3	138652698	138834928	phosphatidylinositol-4,5-bisphosphate 3-kinase catalytic subunit beta [Source:HGNC Symbol;Acc:HGNC:8976]	3727	3457	3895	3959
ENSG00000051523	CYBA	4161	16	88643275	88651083	cytochrome b-245 alpha chain [Source:HGNC Symbol;Acc:HGNC:2577]	2305	2557	2999	2905
ENSG00000051596	THOC3	3449	5	175917873	176034680	THO complex subunit 3 [Source:HGNC Symbol;Acc:HGNC:19072]	1062	1841	1150	1157
ENSG00000051620	HEBP2	10352	6	138403531	138422197	heme binding protein 2 [Source:HGNC Symbol;Acc:HGNC:15716]	4475	5068	4217	3563
ENSG00000051825	MPHOSPH9	10304	12	123152320	123244014	M-phase phosphoprotein 9 [Source:HGNC Symbol;Acc:HGNC:7215]	610	634	1034	1027
ENSG00000052126	PLEKHA5	36233	12	19129669	19376400	pleckstrin homology domain containing A5 [Source:HGNC Symbol;Acc:HGNC:30036]	0	0	2	2
ENSG00000052344	PRSS8	2975	16	31131433	31135727	serine protease 8 [Source:HGNC Symbol;Acc:HGNC:9491]	2587	2622	1828	1672
ENSG00000052723	SIKE1	5894	1	114769479	114780685	suppressor of IKBKE 1 [Source:HGNC Symbol;Acc:HGNC:26119]	2710	3280	3776	3671
ENSG00000052749	RRP12	8529	10	97356358	97426076	ribosomal RNA processing 12 homolog [Source:HGNC Symbol;Acc:HGNC:29100]	763	679	2256	2473
ENSG00000052795	FNIP2	10981	4	158769026	158908050	folliculin interacting protein 2 [Source:HGNC Symbol;Acc:HGNC:29280]	1626	1461	956	998
ENSG00000052802	MSMO1	2852	4	165327667	165343164	methylsterol monooxygenase 1 [Source:HGNC Symbol;Acc:HGNC:10545]	1730	2407	4467	3930
ENSG00000052841	TTC17	11296	11	43358920	43494933	tetratricopeptide repeat domain 17 [Source:HGNC Symbol;Acc:HGNC:25596]	6230	6279	8282	8489
ENSG00000052850	ALX4	5727	11	44260440	44310139	ALX homeobox 4 [Source:HGNC Symbol;Acc:HGNC:450]	49	13	24	31
ENSG00000053108	FSTL4	6710	5	133196455	133612541	follistatin like 4 [Source:HGNC Symbol;Acc:HGNC:21389]	0	2	4	1
ENSG00000053254	FOXN3	11154	14	89124871	89619149	forkhead box N3 [Source:HGNC Symbol;Acc:HGNC:1928]	702	660	955	830
ENSG00000053328	METTL24	3839	6	110243940	110358349	methyltransferase like 24 [Source:HGNC Symbol;Acc:HGNC:21566]	0	0	0	9
ENSG00000053371	AKR7A2	1779	1	19303965	19312144	aldo-keto reductase family 7 member A2 [Source:HGNC Symbol;Acc:HGNC:389]	1094	1064	808	748
ENSG00000053372	MRTO4	2556	1	19251805	19260128	MRT4 homolog, ribosome maturation factor [Source:HGNC Symbol;Acc:HGNC:18477]	1859	1619	2059	2360
ENSG00000053438	NNAT	1329	20	37521206	37523690	neuronatin [Source:HGNC Symbol;Acc:HGNC:7860]	61	107	114	122
ENSG00000053501	USE1	2431	19	17215346	17219829	unconventional SNARE in the ER 1 [Source:HGNC Symbol;Acc:HGNC:30882]	307	437	349	412
ENSG00000053524	MCF2L2	20884	3	183178041	183428778	MCF.2 cell line derived transforming sequence-like 2 [Source:HGNC Symbol;Acc:HGNC:30319]	12	18	13	26
ENSG00000053702	NRIP2	2814	12	2825348	2835544	nuclear receptor interacting protein 2 [Source:HGNC Symbol;Acc:HGNC:23078]	19	23	42	30
ENSG00000053747	LAMA3	14488	18	23689453	23956222	laminin subunit alpha 3 [Source:HGNC Symbol;Acc:HGNC:6483]	558	502	316	347
ENSG00000053770	AP5M1	13019	14	57268924	57298742	adaptor related protein complex 5 subunit mu 1 [Source:HGNC Symbol;Acc:HGNC:20192]	2601	2587	3221	3437
ENSG00000053900	ANAPC4	7444	4	25377263	25418498	anaphase promoting complex subunit 4 [Source:HGNC Symbol;Acc:HGNC:19990]	835	1050	999	1043
ENSG00000053918	KCNQ1	4450	11	2444654	2849105	potassium voltage-gated channel subfamily Q member 1 [Source:HGNC Symbol;Acc:HGNC:6294]	54	60	95	91
ENSG00000054116	TRAPPC3	3527	1	36136570	36156053	trafficking protein particle complex subunit 3 [Source:HGNC Symbol;Acc:HGNC:19942]	3038	3234	2605	2466
ENSG00000054118	THRAP3	4720	1	36224432	36305357	thyroid hormone receptor associated protein 3 [Source:HGNC Symbol;Acc:HGNC:22964]	5475	5449	7795	7918
ENSG00000054148	PHPT1	1612	9	136848724	136851027	phosphohistidine phosphatase 1 [Source:HGNC Symbol;Acc:HGNC:30033]	236	297	383	308
ENSG00000054179	ENTPD2	2640	9	137048107	137054061	ectonucleoside triphosphate diphosphohydrolase 2 [Source:HGNC Symbol;Acc:HGNC:3364]	100	76	147	109
ENSG00000054219	LY75	8805	2	159803355	159904756	lymphocyte antigen 75 [Source:HGNC Symbol;Acc:HGNC:6729]	285	403	435	342
ENSG00000054267	ARID4B	11073	1	235131634	235328219	AT-rich interaction domain 4B [Source:HGNC Symbol;Acc:HGNC:15550]	2407	2271	3032	2879
ENSG00000054277	OPN3	3724	1	241590102	241677376	opsin 3 [Source:HGNC Symbol;Acc:HGNC:14007]	418	393	249	197
ENSG00000054282	SDCCAG8	5321	1	243256034	243500091	SHH signaling and ciliogenesis regulator SDCCAG8 [Source:HGNC Symbol;Acc:HGNC:10671]	550	475	457	529
ENSG00000054356	PTPRN	8228	2	219289623	219309648	protein tyrosine phosphatase receptor type N [Source:HGNC Symbol;Acc:HGNC:9676]	0	0	0	0
ENSG00000054392	HHAT	6645	1	210328252	210676296	hedgehog acyltransferase [Source:HGNC Symbol;Acc:HGNC:18270]	113	169	112	105
ENSG00000054523	KIF1B	18915	1	10210570	10381603	kinesin family member 1B [Source:HGNC Symbol;Acc:HGNC:16636]	3211	3207	3000	2726
ENSG00000054598	FOXC1	3983	6	1609915	1613897	forkhead box C1 [Source:HGNC Symbol;Acc:HGNC:3800]	2393	2220	3282	3204
ENSG00000054611	TBC1D22A	5315	22	46762617	47175699	TBC1 domain family member 22A [Source:HGNC Symbol;Acc:HGNC:1309]	1914	1600	1902	1721
ENSG00000054654	SYNE2	32359	14	63761899	64226433	spectrin repeat containing nuclear envelope protein 2 [Source:HGNC Symbol;Acc:HGNC:17084]	5509	4823	4655	3557
ENSG00000054690	PLEKHH1	10828	14	67533290	67589612	pleckstrin homology, MyTH4 and FERM domain containing H1 [Source:HGNC Symbol;Acc:HGNC:17733]	483	549	616	648
ENSG00000054793	ATP9A	8073	20	51596514	51768390	ATPase phospholipid transporting 9A (putative) [Source:HGNC Symbol;Acc:HGNC:13540]	4609	3924	3806	3543
ENSG00000054938	CHRDL2	3114	11	74696429	74731426	chordin like 2 [Source:HGNC Symbol;Acc:HGNC:24168]	0	2	4	3
ENSG00000054965	FAM168A	7887	11	73400487	73598189	family with sequence similarity 168 member A [Source:HGNC Symbol;Acc:HGNC:28999]	6196	5840	5194	5276
ENSG00000054967	RELT	6187	11	73376399	73397474	RELT TNF receptor [Source:HGNC Symbol;Acc:HGNC:13764]	655	707	747	641
ENSG00000055044	NOP58	3274	2	202265736	202303661	NOP58 ribonucleoprotein [Source:HGNC Symbol;Acc:HGNC:29926]	1827	2165	2600	2445
ENSG00000055070	SZRD1	4742	1	16352575	16398145	SUZ RNA binding domain containing 1 [Source:HGNC Symbol;Acc:HGNC:30232]	2846	2747	2945	2806
ENSG00000055118	KCNH2	7207	7	150944961	150978321	potassium voltage-gated channel subfamily H member 2 [Source:HGNC Symbol;Acc:HGNC:6251]	0	0	8	4
ENSG00000055130	CUL1	4152	7	148697914	148801110	cullin 1 [Source:HGNC Symbol;Acc:HGNC:2551]	3746	3745	3325	3160
ENSG00000055147	FAM114A2	6523	5	153990148	154038936	family with sequence similarity 114 member A2 [Source:HGNC Symbol;Acc:HGNC:1333]	598	633	490	478
ENSG00000055208	TAB2	6109	6	149218641	149411613	TGF-beta activated kinase 1 (MAP3K7) binding protein 2 [Source:HGNC Symbol;Acc:HGNC:17075]	5589	4921	7061	7437
ENSG00000055211	GINM1	2250	6	149566294	149591748	glycosylated integral membrane protein 1 [Source:HGNC Symbol;Acc:HGNC:21074]	1492	1905	2000	1812
ENSG00000055332	EIF2AK2	11036	2	37099210	37157522	eukaryotic translation initiation factor 2 alpha kinase 2 [Source:HGNC Symbol;Acc:HGNC:9437]	9508	9748	9800	10474
ENSG00000055483	USP36	9269	17	78787381	78841441	ubiquitin specific peptidase 36 [Source:HGNC Symbol;Acc:HGNC:20062]	4269	3601	3824	3775
ENSG00000055609	KMT2C	53322	7	152134922	152436644	lysine methyltransferase 2C [Source:HGNC Symbol;Acc:HGNC:13726]	2844	2594	2577	2210
ENSG00000055732	MCOLN3	6624	1	85018082	85048500	mucolipin TRP cation channel 3 [Source:HGNC Symbol;Acc:HGNC:13358]	515	611	738	798
ENSG00000055917	PUM2	6979	2	20248691	20352234	pumilio RNA binding family member 2 [Source:HGNC Symbol;Acc:HGNC:14958]	8019	8726	9133	8396
ENSG00000055950	MRPL43	3578	10	100969458	100987515	mitochondrial ribosomal protein L43 [Source:HGNC Symbol;Acc:HGNC:14517]	734	763	738	656
ENSG00000055955	ITIH4	4659	3	52812962	52830688	inter-alpha-trypsin inhibitor heavy chain 4 [Source:HGNC Symbol;Acc:HGNC:6169]	3	5	5	1
ENSG00000055957	ITIH1	4541	3	52777595	52792068	inter-alpha-trypsin inhibitor heavy chain 1 [Source:HGNC Symbol;Acc:HGNC:6166]	0	0	0	0
ENSG00000056050	HPF1	1422	4	169729470	169757944	histone PARylation factor 1 [Source:HGNC Symbol;Acc:HGNC:26051]	671	886	857	872
ENSG00000056097	ZFR	6771	5	32354350	32444740	zinc finger RNA binding protein [Source:HGNC Symbol;Acc:HGNC:17277]	5451	5618	6481	6626
ENSG00000056277	ZNF280C	4638	X	130202707	130268899	zinc finger protein 280C [Source:HGNC Symbol;Acc:HGNC:25955]	253	317	276	353
ENSG00000056487	PHF21B	6007	22	44881162	45010005	PHD finger protein 21B [Source:HGNC Symbol;Acc:HGNC:25161]	0	0	0	0
ENSG00000056558	TRAF1	4476	9	120902393	120929173	TNF receptor associated factor 1 [Source:HGNC Symbol;Acc:HGNC:12031]	48	94	41	31
ENSG00000056586	RC3H2	11563	9	122844556	122905359	ring finger and CCCH-type domains 2 [Source:HGNC Symbol;Acc:HGNC:21461]	3479	3327	5332	4892
ENSG00000056736	IL17RB	3044	3	53846568	53865794	interleukin 17 receptor B [Source:HGNC Symbol;Acc:HGNC:18015]	226	241	291	370
ENSG00000056972	TRAF3IP2	12634	6	111555381	111606906	TRAF3 interacting protein 2 [Source:HGNC Symbol;Acc:HGNC:1343]	1622	1595	1546	1523
ENSG00000056998	GYG2	3612	X	2828822	2882818	glycogenin 2 [Source:HGNC Symbol;Acc:HGNC:4700]	792	648	1186	1285
ENSG00000057019	DCBLD2	11280	3	98795941	98901695	discoidin, CUB and LCCL domain containing 2 [Source:HGNC Symbol;Acc:HGNC:24627]	2166	2003	1221	1275
ENSG00000057149	SERPINB3	1707	18	63655197	63661893	serpin family B member 3 [Source:HGNC Symbol;Acc:HGNC:10569]	54	61	160	112
ENSG00000057252	SOAT1	7005	1	179293714	179358680	sterol O-acyltransferase 1 [Source:HGNC Symbol;Acc:HGNC:11177]	1801	1753	2758	2608
ENSG00000057294	PKP2	10288	12	32790745	32896798	plakophilin 2 [Source:HGNC Symbol;Acc:HGNC:9024]	4173	4069	2199	2202
ENSG00000057468	MSH4	3270	1	75796882	75913242	mutS homolog 4 [Source:HGNC Symbol;Acc:HGNC:7327]	0	0	1	1
ENSG00000057593	F7	3799	13	113105788	113120685	coagulation factor VII [Source:HGNC Symbol;Acc:HGNC:3544]	1	4	2	2
ENSG00000057608	GDI2	3918	10	5765223	5842132	GDP dissociation inhibitor 2 [Source:HGNC Symbol;Acc:HGNC:4227]	17116	16490	16133	17000
ENSG00000057657	PRDM1	6750	6	105993463	106109939	PR/SET domain 1 [Source:HGNC Symbol;Acc:HGNC:9346]	1438	1348	780	794
ENSG00000057663	ATG5	5655	6	106045423	106325791	autophagy related 5 [Source:HGNC Symbol;Acc:HGNC:589]	3291	4199	3370	3087
ENSG00000057704	TMCC3	6512	12	94567122	94650557	transmembrane and coiled-coil domain family 3 [Source:HGNC Symbol;Acc:HGNC:29199]	0	4	0	2
ENSG00000057757	PITHD1	2173	1	23778418	23788232	PITH domain containing 1 [Source:HGNC Symbol;Acc:HGNC:25022]	3661	3851	2404	2452
ENSG00000057935	MTA3	10580	2	42494569	42756947	metastasis associated 1 family member 3 [Source:HGNC Symbol;Acc:HGNC:23784]	2324	2374	2806	2661
ENSG00000058056	USP13	15296	3	179653032	179804366	ubiquitin specific peptidase 13 [Source:HGNC Symbol;Acc:HGNC:12611]	231	324	348	250
ENSG00000058063	ATP11B	9187	3	182793503	182921629	ATPase phospholipid transporting 11B (putative) [Source:HGNC Symbol;Acc:HGNC:13553]	2337	2322	2496	2401
ENSG00000058085	LAMC2	6770	1	183186238	183245127	laminin subunit gamma 2 [Source:HGNC Symbol;Acc:HGNC:6493]	4277	3961	2047	1794
ENSG00000058091	CDK14	7017	7	90466424	91210590	cyclin dependent kinase 14 [Source:HGNC Symbol;Acc:HGNC:8883]	493	571	184	169
ENSG00000058262	SEC61A1	11707	3	128051641	128071705	SEC61 translocon subunit alpha 1 [Source:HGNC Symbol;Acc:HGNC:18276]	18188	16467	17043	17663
ENSG00000058272	PPP1R12A	11864	12	79773563	79935460	protein phosphatase 1 regulatory subunit 12A [Source:HGNC Symbol;Acc:HGNC:7618]	2424	2528	1947	2048
ENSG00000058335	RASGRF1	9977	15	78959906	79090780	Ras protein specific guanine nucleotide releasing factor 1 [Source:HGNC Symbol;Acc:HGNC:9875]	238	245	601	569
ENSG00000058404	CAMK2B	11598	7	44210019	44334577	calcium/calmodulin dependent protein kinase II beta [Source:HGNC Symbol;Acc:HGNC:1461]	27	56	34	35
ENSG00000058453	CROCC	8875	1	16740273	16972964	ciliary rootlet coiled-coil, rootletin [Source:HGNC Symbol;Acc:HGNC:21299]	645	542	513	599
ENSG00000058600	POLR3E	9486	16	22297375	22335101	RNA polymerase III subunit E [Source:HGNC Symbol;Acc:HGNC:30347]	1471	1287	1611	1447
ENSG00000058668	ATP2B4	9502	1	203626832	203744081	ATPase plasma membrane Ca2+ transporting 4 [Source:HGNC Symbol;Acc:HGNC:817]	5119	4217	3749	3582
ENSG00000058673	ZC3H11A	12829	1	203795623	203854999	zinc finger CCCH-type containing 11A [Source:HGNC Symbol;Acc:HGNC:29093]	14	10	10	11
ENSG00000058729	RIOK2	5489	5	97160867	97183247	RIO kinase 2 [Source:HGNC Symbol;Acc:HGNC:18999]	834	779	848	871
ENSG00000058799	YIPF1	2036	1	53851719	53889798	Yip1 domain family member 1 [Source:HGNC Symbol;Acc:HGNC:25231]	1816	1843	2027	1767
ENSG00000058804	NDC1	4720	1	53765478	53838463	NDC1 transmembrane nucleoporin [Source:HGNC Symbol;Acc:HGNC:25525]	2733	3057	5454	5337
ENSG00000058866	DGKG	10975	3	186105668	186362234	diacylglycerol kinase gamma [Source:HGNC Symbol;Acc:HGNC:2853]	0	0	0	0
ENSG00000059122	FLYWCH1	8425	16	2911931	2951208	FLYWCH-type zinc finger 1 [Source:HGNC Symbol;Acc:HGNC:25404]	1765	1636	1507	1687
ENSG00000059145	UNKL	7494	16	1363205	1414751	unk like zinc finger [Source:HGNC Symbol;Acc:HGNC:14184]	503	454	494	495
ENSG00000059377	TBXAS1	6177	7	139777051	140020325	thromboxane A synthase 1 [Source:HGNC Symbol;Acc:HGNC:11609]	33	44	30	52
ENSG00000059378	PARP12	5510	7	140023749	140062951	poly(ADP-ribose) polymerase family member 12 [Source:HGNC Symbol;Acc:HGNC:21919]	1345	1388	1753	1559
ENSG00000059573	ALDH18A1	3759	10	95605941	95656711	aldehyde dehydrogenase 18 family member A1 [Source:HGNC Symbol;Acc:HGNC:9722]	4252	4004	3978	3982
ENSG00000059588	TARBP1	7819	1	234391313	234479179	TAR (HIV-1) RNA binding protein 1 [Source:HGNC Symbol;Acc:HGNC:11568]	2133	2491	3326	3272
ENSG00000059691	GATB	11741	4	151670504	151761007	glutamyl-tRNA amidotransferase subunit B [Source:HGNC Symbol;Acc:HGNC:8849]	1237	1249	1085	862
ENSG00000059728	MXD1	6351	2	69897688	69942945	MAX dimerization protein 1 [Source:HGNC Symbol;Acc:HGNC:6761]	2045	2324	3373	3154
ENSG00000059758	CDK17	6467	12	96278261	96400480	cyclin dependent kinase 17 [Source:HGNC Symbol;Acc:HGNC:8750]	685	840	1137	1077
ENSG00000059769	DNAJC25	2604	9	111631334	111654351	DnaJ heat shock protein family (Hsp40) member C25 [Source:HGNC Symbol;Acc:HGNC:34187]	477	643	402	345
ENSG00000059804	SLC2A3	7252	12	7919230	8019007	solute carrier family 2 member 3 [Source:HGNC Symbol;Acc:HGNC:11007]	12	19	6	11
ENSG00000059915	PSD	5979	10	102402617	102421539	pleckstrin and Sec7 domain containing [Source:HGNC Symbol;Acc:HGNC:9507]	4	5	13	17
ENSG00000060069	CTDP1	6196	18	79679803	79754503	CTD phosphatase subunit 1 [Source:HGNC Symbol;Acc:HGNC:2498]	1652	1457	1550	1607
ENSG00000060138	YBX3	8621	12	10699089	10723323	Y-box binding protein 3 [Source:HGNC Symbol;Acc:HGNC:2428]	14302	13059	12466	12747
ENSG00000060140	STYK1	3440	12	10618923	10674318	serine/threonine/tyrosine kinase 1 [Source:HGNC Symbol;Acc:HGNC:18889]	251	303	172	145
ENSG00000060237	WNK1	17280	12	752579	911452	WNK lysine deficient protein kinase 1 [Source:HGNC Symbol;Acc:HGNC:14540]	11319	9922	11502	10661
ENSG00000060339	CCAR1	6059	10	68721012	68792377	cell division cycle and apoptosis regulator 1 [Source:HGNC Symbol;Acc:HGNC:24236]	2798	3328	4447	4285
ENSG00000060491	OGFR	4702	20	62804835	62814000	opioid growth factor receptor [Source:HGNC Symbol;Acc:HGNC:15768]	2154	2198	1126	1228
ENSG00000060558	GNA15	2753	19	3136033	3163749	G protein subunit alpha 15 [Source:HGNC Symbol;Acc:HGNC:4383]	116	88	86	92
ENSG00000060566	CREB3L3	2648	19	4153631	4173054	cAMP responsive element binding protein 3 like 3 [Source:HGNC Symbol;Acc:HGNC:18855]	0	0	6	0
ENSG00000060642	PIGV	8084	1	26787054	26800659	phosphatidylinositol glycan anchor biosynthesis class V [Source:HGNC Symbol;Acc:HGNC:26031]	274	241	320	355
ENSG00000060656	PTPRU	6682	1	29236516	29326813	protein tyrosine phosphatase receptor type U [Source:HGNC Symbol;Acc:HGNC:9683]	2369	1933	3204	3112
ENSG00000060688	SNRNP40	3887	1	31259568	31296788	small nuclear ribonucleoprotein U5 subunit 40 [Source:HGNC Symbol;Acc:HGNC:30857]	1195	1016	1252	1207
ENSG00000060749	QSER1	10908	11	32892811	32993316	glutamine and serine rich 1 [Source:HGNC Symbol;Acc:HGNC:26154]	7785	8061	19170	17436
ENSG00000060762	MPC1	1540	6	166364919	166383013	mitochondrial pyruvate carrier 1 [Source:HGNC Symbol;Acc:HGNC:21606]	2459	2862	2442	2446
ENSG00000060971	ACAA1	7106	3	38103129	38137242	acetyl-CoA acyltransferase 1 [Source:HGNC Symbol;Acc:HGNC:82]	1000	1015	834	836
ENSG00000061273	HDAC7	9928	12	47782722	47833132	histone deacetylase 7 [Source:HGNC Symbol;Acc:HGNC:14067]	4772	4153	3808	3374
ENSG00000061455	PRDM6	9230	5	123089241	123194266	PR/SET domain 6 [Source:HGNC Symbol;Acc:HGNC:9350]	100	142	184	117
ENSG00000061492	WNT8A	1991	5	138083990	138092365	Wnt family member 8A [Source:HGNC Symbol;Acc:HGNC:12788]	3	6	0	2
ENSG00000061656	SPAG4	2348	20	35615829	35621094	sperm associated antigen 4 [Source:HGNC Symbol;Acc:HGNC:11214]	33	21	44	18
ENSG00000061676	NCKAP1	22520	2	182909115	183038858	NCK associated protein 1 [Source:HGNC Symbol;Acc:HGNC:7666]	14754	15767	15805	14652
ENSG00000061794	MRPS35	1930	12	27710822	27756295	mitochondrial ribosomal protein S35 [Source:HGNC Symbol;Acc:HGNC:16635]	1401	1607	1811	1482
ENSG00000061918	GUCY1B1	3944	4	155758992	155807811	guanylate cyclase 1 soluble subunit beta 1 [Source:HGNC Symbol;Acc:HGNC:4687]	753	790	835	876
ENSG00000061936	SFSWAP	10158	12	131711081	131799738	splicing factor SWAP [Source:HGNC Symbol;Acc:HGNC:10790]	1470	1467	1677	1621
ENSG00000061938	TNK2	12245	3	195863364	195911945	tyrosine kinase non receptor 2 [Source:HGNC Symbol;Acc:HGNC:19297]	509	630	1315	1365
ENSG00000061987	MON2	16014	12	62466817	62600476	MON2 homolog, regulator of endosome-to-Golgi trafficking [Source:HGNC Symbol;Acc:HGNC:29177]	1980	1998	1852	1698
ENSG00000062038	CDH3	6392	16	68636189	68727468	cadherin 3 [Source:HGNC Symbol;Acc:HGNC:1762]	5036	4666	3789	3465
ENSG00000062194	GPBP1	6472	5	57173948	57264679	GC-rich promoter binding protein 1 [Source:HGNC Symbol;Acc:HGNC:29520]	3006	3457	3231	3432
ENSG00000062282	DGAT2	7904	11	75759512	75801535	diacylglycerol O-acyltransferase 2 [Source:HGNC Symbol;Acc:HGNC:16940]	455	566	577	543
ENSG00000062370	ZNF112	3848	19	44326555	44367217	zinc finger protein 112 [Source:HGNC Symbol;Acc:HGNC:12892]	233	237	288	215
ENSG00000062485	CS	6401	12	56271699	56300391	citrate synthase [Source:HGNC Symbol;Acc:HGNC:2422]	5342	5476	4844	4868
ENSG00000062524	LTK	3491	15	41503637	41513887	leukocyte receptor tyrosine kinase [Source:HGNC Symbol;Acc:HGNC:6721]	7	5	7	2
ENSG00000062582	MRPS24	2607	7	43866558	43869893	mitochondrial ribosomal protein S24 [Source:HGNC Symbol;Acc:HGNC:14510]	138	146	132	121
ENSG00000062598	ELMO2	6597	20	46366050	46432985	engulfment and cell motility 2 [Source:HGNC Symbol;Acc:HGNC:17233]	1322	1475	1547	1615
ENSG00000062650	WAPL	7205	10	86435256	86521792	WAPL cohesin release factor [Source:HGNC Symbol;Acc:HGNC:23293]	3975	3894	5321	4850
ENSG00000062716	VMP1	10001	17	59707192	59842255	vacuole membrane protein 1 [Source:HGNC Symbol;Acc:HGNC:29559]	2240	2934	2465	2091
ENSG00000062725	APPBP2	9890	17	60443158	60526242	amyloid beta precursor protein binding protein 2 [Source:HGNC Symbol;Acc:HGNC:622]	1406	1432	1604	1506
ENSG00000062822	POLD1	4934	19	50384204	50418018	DNA polymerase delta 1, catalytic subunit [Source:HGNC Symbol;Acc:HGNC:9175]	3382	2925	4246	4013
ENSG00000063015	SEZ6	4946	17	28954901	29006440	seizure related 6 homolog [Source:HGNC Symbol;Acc:HGNC:15955]	0	4	0	0
ENSG00000063046	EIF4B	6028	12	53006282	53042215	eukaryotic translation initiation factor 4B [Source:HGNC Symbol;Acc:HGNC:3285]	4653	4765	7343	7511
ENSG00000063127	SLC6A16	3589	19	49289638	49325215	solute carrier family 6 member 16 [Source:HGNC Symbol;Acc:HGNC:13622]	69	64	65	111
ENSG00000063169	BICRA	7496	19	47608196	47703277	BRD4 interacting chromatin remodeling complex associated protein [Source:HGNC Symbol;Acc:HGNC:4332]	1329	1219	780	836
ENSG00000063176	SPHK2	6009	19	48619291	48630717	sphingosine kinase 2 [Source:HGNC Symbol;Acc:HGNC:18859]	443	459	572	515
ENSG00000063177	RPL18	3857	19	48615328	48619184	ribosomal protein L18 [Source:HGNC Symbol;Acc:HGNC:10310]	14508	14162	15204	14568
ENSG00000063180	CA11	1946	19	48637946	48646187	carbonic anhydrase 11 [Source:HGNC Symbol;Acc:HGNC:1370]	360	397	416	446
ENSG00000063241	ISOC2	4408	19	55452985	55462343	isochorismatase domain containing 2 [Source:HGNC Symbol;Acc:HGNC:26278]	2020	2057	1834	1863
ENSG00000063244	U2AF2	4040	19	55654146	55674716	U2 small nuclear RNA auxiliary factor 2 [Source:HGNC Symbol;Acc:HGNC:23156]	10544	10023	13162	13139
ENSG00000063245	EPN1	17616	19	55675226	55709858	epsin 1 [Source:HGNC Symbol;Acc:HGNC:21604]	10207	9214	7532	7189
ENSG00000063322	MED29	3839	19	39391303	39400641	mediator complex subunit 29 [Source:HGNC Symbol;Acc:HGNC:23074]	1898	1869	2687	2462
ENSG00000063438	AHRR	9480	5	321714	438291	aryl hydrocarbon receptor repressor [Source:HGNC Symbol;Acc:HGNC:346]	4	10	4	2
ENSG00000063515	GSC2	2625	22	19146993	19150292	goosecoid homeobox 2 [Source:HGNC Symbol;Acc:HGNC:4613]	0	4	2	0
ENSG00000063587	ZNF275	8147	X	153334147	153360110	zinc finger protein 275 [Source:HGNC Symbol;Acc:HGNC:13069]	0	2	4	2
ENSG00000063601	MTMR1	6328	X	150692971	150765108	myotubularin related protein 1 [Source:HGNC Symbol;Acc:HGNC:7449]	3233	3462	2761	2707
ENSG00000063660	GPC1	6522	2	240435663	240468076	glypican 1 [Source:HGNC Symbol;Acc:HGNC:4449]	1352	1338	1522	1470
ENSG00000063761	ADCK1	5293	14	77800109	77935014	aarF domain containing kinase 1 [Source:HGNC Symbol;Acc:HGNC:19038]	422	370	385	368
ENSG00000063854	HAGH	5839	16	1795620	1827157	hydroxyacylglutathione hydrolase [Source:HGNC Symbol;Acc:HGNC:4805]	236	303	709	607
ENSG00000063978	RNF4	6836	4	2462220	2515857	ring finger protein 4 [Source:HGNC Symbol;Acc:HGNC:10067]	1905	1992	1539	1414
ENSG00000064012	CASP8	7237	2	201233443	201361836	caspase 8 [Source:HGNC Symbol;Acc:HGNC:1509]	626	856	683	627
ENSG00000064042	LIMCH1	10862	4	41359607	41700044	LIM and calponin homology domains 1 [Source:HGNC Symbol;Acc:HGNC:29191]	6378	6075	7079	6227
ENSG00000064102	INTS13	3059	12	26905181	26938326	integrator complex subunit 13 [Source:HGNC Symbol;Acc:HGNC:20174]	1665	1681	1574	1809
ENSG00000064115	TM7SF3	5504	12	26971579	27014434	transmembrane 7 superfamily member 3 [Source:HGNC Symbol;Acc:HGNC:23049]	1793	1817	1809	1619
ENSG00000064195	DLX3	2715	17	49990005	49995224	distal-less homeobox 3 [Source:HGNC Symbol;Acc:HGNC:2916]	784	849	783	731
ENSG00000064199	SPA17	5159	11	124673844	124697518	sperm autoantigenic protein 17 [Source:HGNC Symbol;Acc:HGNC:11210]	52	33	27	48
ENSG00000064201	TSPAN32	3797	11	2301997	2318204	tetraspanin 32 [Source:HGNC Symbol;Acc:HGNC:13410]	0	14	0	1
ENSG00000064205	CCN5	4981	20	44714844	44728509	cellular communication network factor 5 [Source:HGNC Symbol;Acc:HGNC:12770]	60	29	48	31
ENSG00000064218	DMRT3	2697	9	976655	991732	doublesex and mab-3 related transcription factor 3 [Source:HGNC Symbol;Acc:HGNC:13909]	6	20	2	2
ENSG00000064225	ST3GAL6	6304	3	98732236	98821201	ST3 beta-galactoside alpha-2,3-sialyltransferase 6 [Source:HGNC Symbol;Acc:HGNC:18080]	47	61	47	45
ENSG00000064270	ATP2C2	7352	16	84368527	84464187	ATPase secretory pathway Ca2+ transporting 2 [Source:HGNC Symbol;Acc:HGNC:29103]	832	857	1013	1098
ENSG00000064300	NGFR	4141	17	49495293	49515008	nerve growth factor receptor [Source:HGNC Symbol;Acc:HGNC:7809]	2	10	8	2
ENSG00000064309	CDON	19924	11	125955796	126063335	cell adhesion associated, oncogene regulated [Source:HGNC Symbol;Acc:HGNC:17104]	462	375	578	574
ENSG00000064313	TAF2	16255	8	119730774	119832863	TATA-box binding protein associated factor 2 [Source:HGNC Symbol;Acc:HGNC:11536]	2175	2108	2202	2142
ENSG00000064393	HIPK2	15622	7	139561570	139777998	homeodomain interacting protein kinase 2 [Source:HGNC Symbol;Acc:HGNC:14402]	1818	1561	5741	4642
ENSG00000064419	TNPO3	4676	7	128954180	129055173	transportin 3 [Source:HGNC Symbol;Acc:HGNC:17103]	6419	5549	5684	5907
ENSG00000064489	BORCS8-MEF2B	1929	19	19145569	19192158	BORCS8-MEF2B readthrough [Source:HGNC Symbol;Acc:HGNC:39979]	0	0	1	0
ENSG00000064490	RFXANK	2503	19	19192229	19201869	regulatory factor X associated ankyrin containing protein [Source:HGNC Symbol;Acc:HGNC:9987]	1611	1631	1753	1693
ENSG00000064545	TMEM161A	3281	19	19119169	19138513	transmembrane protein 161A [Source:HGNC Symbol;Acc:HGNC:26020]	1909	1706	1696	1730
ENSG00000064547	LPAR2	2975	19	19623655	19628930	lysophosphatidic acid receptor 2 [Source:HGNC Symbol;Acc:HGNC:3168]	2034	1992	1920	1811
ENSG00000064601	CTSA	8633	20	45890144	45898949	cathepsin A [Source:HGNC Symbol;Acc:HGNC:9251]	3159	2814	3272	3456
ENSG00000064607	SUGP2	8468	19	18990888	19034023	SURP and G-patch domain containing 2 [Source:HGNC Symbol;Acc:HGNC:18641]	5288	5328	6730	7422
ENSG00000064651	SLC12A2	10653	5	128083766	128189677	solute carrier family 12 member 2 [Source:HGNC Symbol;Acc:HGNC:10911]	8910	9069	14419	15550
ENSG00000064652	SNX24	3474	5	122843439	123029354	sorting nexin 24 [Source:HGNC Symbol;Acc:HGNC:21533]	1786	1807	1681	1312
ENSG00000064655	EYA2	3618	20	46894624	47188844	EYA transcriptional coactivator and phosphatase 2 [Source:HGNC Symbol;Acc:HGNC:3520]	1370	1362	1754	1624
ENSG00000064666	CNN2	3640	19	1026586	1039068	calponin 2 [Source:HGNC Symbol;Acc:HGNC:2156]	10651	9514	8402	8198
ENSG00000064687	ABCA7	9591	19	1039997	1065572	ATP binding cassette subfamily A member 7 [Source:HGNC Symbol;Acc:HGNC:37]	1538	1424	2325	2388
ENSG00000064692	SNCAIP	7266	5	122311354	122464219	synuclein alpha interacting protein [Source:HGNC Symbol;Acc:HGNC:11139]	165	160	328	340
ENSG00000064703	DDX20	8778	1	111754832	111775602	DEAD-box helicase 20 [Source:HGNC Symbol;Acc:HGNC:2743]	1513	1591	1833	1756
ENSG00000064726	BTBD1	4066	15	83016423	83067252	BTB domain containing 1 [Source:HGNC Symbol;Acc:HGNC:1120]	1643	1947	2339	2165
ENSG00000064763	FAR2	13684	12	29149016	29341121	fatty acyl-CoA reductase 2 [Source:HGNC Symbol;Acc:HGNC:25531]	100	104	124	121
ENSG00000064787	BCAS1	10533	20	53936777	54070594	brain enriched myelin associated protein 1 [Source:HGNC Symbol;Acc:HGNC:974]	33	30	26	13
ENSG00000064835	POU1F1	1566	3	87259404	87276584	POU class 1 homeobox 1 [Source:HGNC Symbol;Acc:HGNC:9210]	6	0	0	0
ENSG00000064886	CHI3L2	3295	1	111200771	111243440	chitinase 3 like 2 [Source:HGNC Symbol;Acc:HGNC:1933]	554	385	667	703
ENSG00000064932	SBNO2	6610	19	1107637	1174268	strawberry notch homolog 2 [Source:HGNC Symbol;Acc:HGNC:29158]	7349	6334	7234	7092
ENSG00000064933	PMS1	5448	2	189784085	189877629	PMS1 homolog 1, mismatch repair system component [Source:HGNC Symbol;Acc:HGNC:9121]	645	804	915	797
ENSG00000064961	HMG20B	3857	19	3572777	3579088	high mobility group 20B [Source:HGNC Symbol;Acc:HGNC:5002]	2856	2935	3553	3407
ENSG00000064989	CALCRL	7309	2	187341964	187448460	calcitonin receptor like receptor [Source:HGNC Symbol;Acc:HGNC:16709]	20	14	4	7
ENSG00000064995	TAF11	6904	6	34877462	34889192	TATA-box binding protein associated factor 11 [Source:HGNC Symbol;Acc:HGNC:11544]	917	1103	1968	2069
ENSG00000064999	ANKS1A	9967	6	34889255	35091406	ankyrin repeat and sterile alpha motif domain containing 1A [Source:HGNC Symbol;Acc:HGNC:20961]	4385	3938	4719	4406
ENSG00000065000	AP3D1	9317	19	2100988	2164468	adaptor related protein complex 3 subunit delta 1 [Source:HGNC Symbol;Acc:HGNC:568]	13495	10016	10736	10541
ENSG00000065029	ZNF76	6782	6	35258909	35295985	zinc finger protein 76 [Source:HGNC Symbol;Acc:HGNC:13149]	2546	2131	1975	2091
ENSG00000065054	NHERF2	3516	16	2025356	2039026	NHERF family PDZ scaffold protein 2 [Source:HGNC Symbol;Acc:HGNC:11076]	1769	1680	2480	2579
ENSG00000065057	NTHL1	2430	16	2039815	2047866	nth like DNA glycosylase 1 [Source:HGNC Symbol;Acc:HGNC:8028]	395	454	630	518
ENSG00000065060	BLTP3A	9567	6	34792083	34877514	bridge-like lipid transfer protein family member 3A [Source:HGNC Symbol;Acc:HGNC:21216]	5085	4297	4899	4495
ENSG00000065135	GNAI3	9044	1	109548615	109600195	G protein subunit alpha i3 [Source:HGNC Symbol;Acc:HGNC:4387]	9207	9689	8930	8773
ENSG00000065150	IPO5	9664	13	97953658	98024296	importin 5 [Source:HGNC Symbol;Acc:HGNC:6402]	13460	12826	16238	15788
ENSG00000065154	OAT	3388	10	124397303	124418976	ornithine aminotransferase [Source:HGNC Symbol;Acc:HGNC:8091]	6096	6999	4973	4733
ENSG00000065183	WDR3	10276	1	117929720	117966543	WD repeat domain 3 [Source:HGNC Symbol;Acc:HGNC:12755]	1857	1885	2699	2463
ENSG00000065243	PKN2	6897	1	88684222	88836255	protein kinase N2 [Source:HGNC Symbol;Acc:HGNC:9406]	4200	4998	5797	5638
ENSG00000065268	WDR18	2283	19	984332	998438	WD repeat domain 18 [Source:HGNC Symbol;Acc:HGNC:17956]	2049	1839	2061	2120
ENSG00000065308	TRAM2	7047	6	52497408	52577060	translocation associated membrane protein 2 [Source:HGNC Symbol;Acc:HGNC:16855]	3832	3256	3464	3448
ENSG00000065320	NTN1	6415	17	9021510	9244000	netrin 1 [Source:HGNC Symbol;Acc:HGNC:8029]	2691	2348	1833	1655
ENSG00000065325	GLP2R	5696	17	9822206	9892099	glucagon like peptide 2 receptor [Source:HGNC Symbol;Acc:HGNC:4325]	131	151	95	90
ENSG00000065328	MCM10	5456	10	13161558	13211110	minichromosome maintenance 10 replication initiation factor [Source:HGNC Symbol;Acc:HGNC:18043]	693	862	883	965
ENSG00000065357	DGKA	10098	12	55927319	55954027	diacylglycerol kinase alpha [Source:HGNC Symbol;Acc:HGNC:2849]	284	326	167	167
ENSG00000065361	ERBB3	11711	12	56076799	56103505	erb-b2 receptor tyrosine kinase 3 [Source:HGNC Symbol;Acc:HGNC:3431]	2875	2751	3340	3378
ENSG00000065371	ROPN1	4518	3	123968521	123992178	rhophilin associated tail protein 1 [Source:HGNC Symbol;Acc:HGNC:17692]	0	2	0	4
ENSG00000065413	ANKRD44	12826	2	196967017	197311173	ankyrin repeat domain 44 [Source:HGNC Symbol;Acc:HGNC:25259]	239	203	260	224
ENSG00000065427	KARS1	4051	16	75627474	75648643	lysyl-tRNA synthetase 1 [Source:HGNC Symbol;Acc:HGNC:6215]	12910	11246	10137	9854
ENSG00000065457	ADAT1	6118	16	75596868	75623300	adenosine deaminase tRNA specific 1 [Source:HGNC Symbol;Acc:HGNC:228]	2586	2447	2795	2729
ENSG00000065485	PDIA5	4067	3	123067025	123225227	protein disulfide isomerase family A member 5 [Source:HGNC Symbol;Acc:HGNC:24811]	610	620	569	614
ENSG00000065491	TBC1D22B	3462	6	37257772	37332970	TBC1 domain family member 22B [Source:HGNC Symbol;Acc:HGNC:21602]	1224	1088	1009	994
ENSG00000065518	NDUFB4	1877	3	120596328	120602507	NADH:ubiquinone oxidoreductase subunit B4 [Source:HGNC Symbol;Acc:HGNC:7699]	1476	2281	1882	1694
ENSG00000065526	SPEN	15120	1	15836095	15940456	spen family transcriptional repressor [Source:HGNC Symbol;Acc:HGNC:17575]	5949	4831	6344	5186
ENSG00000065534	MYLK	31537	3	123610049	123884332	myosin light chain kinase [Source:HGNC Symbol;Acc:HGNC:7590]	327	413	278	242
ENSG00000065548	ZC3H15	3026	2	186486253	186509361	zinc finger CCCH-type containing 15 [Source:HGNC Symbol;Acc:HGNC:29528]	3098	3484	4079	3995
ENSG00000065559	MAP2K4	5709	17	12020829	12143830	mitogen-activated protein kinase kinase 4 [Source:HGNC Symbol;Acc:HGNC:6844]	1743	1709	2210	2350
ENSG00000065600	PACC1	2917	1	212363928	212414901	proton activated chloride channel 1 [Source:HGNC Symbol;Acc:HGNC:25593]	863	877	634	519
ENSG00000065609	SNAP91	6651	6	83552880	83709691	synaptosome associated protein 91 [Source:HGNC Symbol;Acc:HGNC:14986]	0	0	0	0
ENSG00000065613	SLK	8107	10	103967140	104029233	STE20 like kinase [Source:HGNC Symbol;Acc:HGNC:11088]	3556	3789	3690	3558
ENSG00000065615	CYB5R4	9621	6	83859656	83967423	cytochrome b5 reductase 4 [Source:HGNC Symbol;Acc:HGNC:20147]	1335	1347	1489	1810
ENSG00000065618	COL17A1	6989	10	104031286	104085880	collagen type XVII alpha 1 chain [Source:HGNC Symbol;Acc:HGNC:2194]	30	35	6	8
ENSG00000065621	GSTO2	9926	10	104268873	104304950	glutathione S-transferase omega 2 [Source:HGNC Symbol;Acc:HGNC:23064]	22	21	18	31
ENSG00000065665	SEC61A2	3916	10	12129637	12169961	SEC61 translocon subunit alpha 2 [Source:HGNC Symbol;Acc:HGNC:17702]	197	290	404	481
ENSG00000065675	PRKCQ	3285	10	6427143	6580301	protein kinase C theta [Source:HGNC Symbol;Acc:HGNC:9410]	204	203	317	270
ENSG00000065717	TLE2	4141	19	2997639	3047635	TLE family member 2, transcriptional corepressor [Source:HGNC Symbol;Acc:HGNC:11838]	1700	1654	2095	1977
ENSG00000065802	ASB1	7407	2	238426742	238452250	ankyrin repeat and SOCS box containing 1 [Source:HGNC Symbol;Acc:HGNC:16011]	1627	1470	1561	1574
ENSG00000065809	FAM107B	7019	10	14518557	14774897	family with sequence similarity 107 member B [Source:HGNC Symbol;Acc:HGNC:23726]	1052	1161	1048	908
ENSG00000065833	ME1	3338	6	83210402	83431051	malic enzyme 1 [Source:HGNC Symbol;Acc:HGNC:6983]	2392	2482	2558	2405
ENSG00000065882	TBC1D1	9556	4	37891084	38139175	TBC1 domain family member 1 [Source:HGNC Symbol;Acc:HGNC:11578]	7175	6215	6852	6992
ENSG00000065883	CDK13	24780	7	39950121	40099580	cyclin dependent kinase 13 [Source:HGNC Symbol;Acc:HGNC:1733]	4384	4326	5074	5081
ENSG00000065911	MTHFD2	11443	2	74186172	74217565	methylenetetrahydrofolate dehydrogenase (NADP+ dependent) 2, methenyltetrahydrofolate cyclohydrolase [Source:HGNC Symbol;Acc:HGNC:7434]	3406	3993	3555	3335
ENSG00000065923	SLC9A7	9980	X	46599251	46759118	solute carrier family 9 member A7 [Source:HGNC Symbol;Acc:HGNC:17123]	3866	3812	3619	3387
ENSG00000065970	FOXJ2	6297	12	8032716	8055517	forkhead box J2 [Source:HGNC Symbol;Acc:HGNC:24818]	1874	1692	1689	1680
ENSG00000065978	YBX1	3395	1	42682418	42703805	Y-box binding protein 1 [Source:HGNC Symbol;Acc:HGNC:8014]	48152	42462	52057	53847
ENSG00000065989	PDE4A	6762	19	10416773	10469630	phosphodiesterase 4A [Source:HGNC Symbol;Acc:HGNC:8780]	952	858	569	596
ENSG00000066027	PPP2R5A	3942	1	212285410	212361853	protein phosphatase 2 regulatory subunit B'alpha [Source:HGNC Symbol;Acc:HGNC:9309]	3519	3675	4109	4092
ENSG00000066032	CTNNA2	7535	2	79185231	80648861	catenin alpha 2 [Source:HGNC Symbol;Acc:HGNC:2510]	0	0	0	0
ENSG00000066044	ELAVL1	6962	19	7958573	8005659	ELAV like RNA binding protein 1 [Source:HGNC Symbol;Acc:HGNC:3312]	2625	2730	4247	4115
ENSG00000066056	TIE1	6705	1	43300982	43323108	tyrosine kinase with immunoglobulin like and EGF like domains 1 [Source:HGNC Symbol;Acc:HGNC:11809]	0	0	0	2
ENSG00000066084	DIP2B	10351	12	50504985	50748657	disco interacting protein 2 homolog B [Source:HGNC Symbol;Acc:HGNC:29284]	3935	3892	3279	2694
ENSG00000066117	SMARCD1	4903	12	50085200	50100707	SWI/SNF related, matrix associated, actin dependent regulator of chromatin, subfamily d, member 1 [Source:HGNC Symbol;Acc:HGNC:11106]	1725	1885	1613	1538
ENSG00000066135	KDM4A	5184	1	43650149	43705518	lysine demethylase 4A [Source:HGNC Symbol;Acc:HGNC:22978]	1251	1177	1104	1122
ENSG00000066136	NFYC	5990	1	40691648	40771603	nuclear transcription factor Y subunit gamma [Source:HGNC Symbol;Acc:HGNC:7806]	4383	4339	3551	3396
ENSG00000066185	ZMYND12	2181	1	42430329	42456253	zinc finger MYND-type containing 12 [Source:HGNC Symbol;Acc:HGNC:21192]	30	22	3	24
ENSG00000066230	SLC9A3	5754	5	470456	524449	solute carrier family 9 member A3 [Source:HGNC Symbol;Acc:HGNC:11073]	19	19	68	70
ENSG00000066248	NGEF	4647	2	232878701	233013256	neuronal guanine nucleotide exchange factor [Source:HGNC Symbol;Acc:HGNC:7807]	87	77	112	122
ENSG00000066279	ASPM	11994	1	197084121	197146694	assembly factor for spindle microtubules [Source:HGNC Symbol;Acc:HGNC:19048]	2908	3272	5727	5042
ENSG00000066294	CD84	9255	1	160541095	160579516	CD84 molecule [Source:HGNC Symbol;Acc:HGNC:1704]	0	0	0	0
ENSG00000066322	ELOVL1	2506	1	43363398	43368074	ELOVL fatty acid elongase 1 [Source:HGNC Symbol;Acc:HGNC:14418]	3730	3976	3019	2953
ENSG00000066336	SPI1	2040	11	47354860	47378547	Spi-1 proto-oncogene [Source:HGNC Symbol;Acc:HGNC:11241]	0	6	0	0
ENSG00000066379	POLR1H	3672	6	30058899	30064909	RNA polymerase I subunit H [Source:HGNC Symbol;Acc:HGNC:13182]	136	237	208	195
ENSG00000066422	ZBTB11	15511	3	101648889	101677135	zinc finger and BTB domain containing 11 [Source:HGNC Symbol;Acc:HGNC:16740]	929	1192	1604	1634
ENSG00000066427	ATXN3	9624	14	92044496	92106621	ataxin 3 [Source:HGNC Symbol;Acc:HGNC:7106]	606	722	848	835
ENSG00000066455	GOLGA5	3205	14	92794305	92839947	golgin A5 [Source:HGNC Symbol;Acc:HGNC:4428]	1535	1766	1631	1693
ENSG00000066468	FGFR2	18813	10	121478332	121598458	fibroblast growth factor receptor 2 [Source:HGNC Symbol;Acc:HGNC:3689]	645	720	535	506
ENSG00000066557	LRRC40	2843	1	70144805	70205579	leucine rich repeat containing 40 [Source:HGNC Symbol;Acc:HGNC:26004]	1299	1608	1717	1786
ENSG00000066583	ISOC1	1942	5	129094749	129114028	isochorismatase domain containing 1 [Source:HGNC Symbol;Acc:HGNC:24254]	903	977	1313	1191
ENSG00000066629	EML1	8987	14	99737693	99942060	EMAP like 1 [Source:HGNC Symbol;Acc:HGNC:3330]	2	3	0	0
ENSG00000066651	TRMT11	5722	6	125986479	126203817	tRNA methyltransferase 11 homolog [Source:HGNC Symbol;Acc:HGNC:21080]	774	1101	1075	859
ENSG00000066654	THUMPD1	6501	16	20702816	20742084	THUMP domain containing 1 [Source:HGNC Symbol;Acc:HGNC:23807]	673	757	1429	1308
ENSG00000066697	MSANTD3	3289	9	100427143	100451734	Myb/SANT DNA binding domain containing 3 [Source:HGNC Symbol;Acc:HGNC:23370]	463	569	658	565
ENSG00000066735	KIF26A	7041	14	104136454	104180894	kinesin family member 26A [Source:HGNC Symbol;Acc:HGNC:20226]	2	4	14	12
ENSG00000066739	ATG2B	14256	14	96279195	96363341	autophagy related 2B [Source:HGNC Symbol;Acc:HGNC:20187]	639	656	926	922
ENSG00000066777	ARFGEF1	11059	8	67173511	67343781	ADP ribosylation factor guanine nucleotide exchange factor 1 [Source:HGNC Symbol;Acc:HGNC:15772]	3009	2806	3159	3093
ENSG00000066827	ZFAT	8900	8	134477788	134713049	zinc finger and AT-hook domain containing [Source:HGNC Symbol;Acc:HGNC:19899]	420	360	560	494
ENSG00000066855	MTFR1	4629	8	65644734	65771261	mitochondrial fission regulator 1 [Source:HGNC Symbol;Acc:HGNC:29510]	2432	2566	2755	2925
ENSG00000066923	STAG3	6142	7	100177563	100214387	stromal antigen 3 [Source:HGNC Symbol;Acc:HGNC:11356]	87	66	173	157
ENSG00000066926	FECH	11128	18	57544377	57586732	ferrochelatase [Source:HGNC Symbol;Acc:HGNC:3647]	1231	1334	1320	1154
ENSG00000066933	MYO9A	20319	15	71822291	72118577	myosin IXA [Source:HGNC Symbol;Acc:HGNC:7608]	1668	1539	1941	2062
ENSG00000067057	PFKP	7774	10	3066333	3137718	phosphofructokinase, platelet [Source:HGNC Symbol;Acc:HGNC:8878]	6256	6245	5552	4920
ENSG00000067064	IDI1	4294	10	1039152	1049119	isopentenyl-diphosphate delta isomerase 1 [Source:HGNC Symbol;Acc:HGNC:5387]	2362	3477	3039	2708
ENSG00000067066	SP100	14134	2	230415942	230545606	SP100 nuclear antigen [Source:HGNC Symbol;Acc:HGNC:11206]	753	820	625	705
ENSG00000067082	KLF6	6139	10	3775996	3785281	KLF transcription factor 6 [Source:HGNC Symbol;Acc:HGNC:2235]	3929	4242	2010	1964
ENSG00000067113	PLPP1	1935	5	55424854	55534969	phospholipid phosphatase 1 [Source:HGNC Symbol;Acc:HGNC:9228]	125	146	149	115
ENSG00000067141	NEO1	8137	15	73051710	73305205	neogenin 1 [Source:HGNC Symbol;Acc:HGNC:7754]	1558	1492	1709	1594
ENSG00000067167	TRAM1	4131	8	70573218	70608416	translocation associated membrane protein 1 [Source:HGNC Symbol;Acc:HGNC:20568]	8938	10226	9436	8632
ENSG00000067177	PHKA1	6350	X	72578814	72714319	phosphorylase kinase regulatory subunit alpha 1 [Source:HGNC Symbol;Acc:HGNC:8925]	1702	1639	1395	1317
ENSG00000067182	TNFRSF1A	4205	12	6328757	6342114	TNF receptor superfamily member 1A [Source:HGNC Symbol;Acc:HGNC:11916]	2441	2078	2909	2551
ENSG00000067191	CACNB1	7096	17	39173453	39197702	calcium voltage-gated channel auxiliary subunit beta 1 [Source:HGNC Symbol;Acc:HGNC:1401]	112	98	142	135
ENSG00000067208	EVI5	14589	1	92508696	92792404	ecotropic viral integration site 5 [Source:HGNC Symbol;Acc:HGNC:3501]	807	828	1176	1067
ENSG00000067221	STOML1	10458	15	73978926	73994622	stomatin like 1 [Source:HGNC Symbol;Acc:HGNC:14560]	267	211	187	160
ENSG00000067225	PKM	8572	15	72199029	72231819	pyruvate kinase M1/2 [Source:HGNC Symbol;Acc:HGNC:9021]	46605	41983	44066	43588
ENSG00000067248	DHX29	4890	5	55256055	55307694	DExH-box helicase 29 [Source:HGNC Symbol;Acc:HGNC:15815]	1498	1551	1850	1871
ENSG00000067334	DNTTIP2	7518	1	93866284	93879918	deoxynucleotidyltransferase terminal interacting protein 2 [Source:HGNC Symbol;Acc:HGNC:24013]	3002	3308	4077	3941
ENSG00000067365	METTL22	8254	16	8621683	8649654	methyltransferase 22, Kin17 lysine [Source:HGNC Symbol;Acc:HGNC:28368]	336	314	332	423
ENSG00000067369	TP53BP1	12976	15	43403061	43510728	tumor protein p53 binding protein 1 [Source:HGNC Symbol;Acc:HGNC:11999]	1619	1381	1993	1870
ENSG00000067445	TRO	6716	X	54920462	54931431	trophinin [Source:HGNC Symbol;Acc:HGNC:12326]	4	6	4	2
ENSG00000067533	RRP15	7877	1	218285293	218337983	ribosomal RNA processing 15 homolog [Source:HGNC Symbol;Acc:HGNC:24255]	902	1196	1379	1328
ENSG00000067560	RHOA	4805	3	49359139	49412998	ras homolog family member A [Source:HGNC Symbol;Acc:HGNC:667]	6745	7114	8272	7757
ENSG00000067596	DHX8	10760	17	43483865	43610338	DEAH-box helicase 8 [Source:HGNC Symbol;Acc:HGNC:2749]	2930	2129	2507	2568
ENSG00000067606	PRKCZ	7695	1	2050411	2185395	protein kinase C zeta [Source:HGNC Symbol;Acc:HGNC:9412]	693	598	712	604
ENSG00000067704	IARS2	4135	1	220094132	220148041	isoleucyl-tRNA synthetase 2, mitochondrial [Source:HGNC Symbol;Acc:HGNC:29685]	5729	5628	11350	11695
ENSG00000067715	SYT1	9463	12	78863993	79452008	synaptotagmin 1 [Source:HGNC Symbol;Acc:HGNC:11509]	14	19	2	5
ENSG00000067798	NAV3	13278	12	77324641	78213010	neuron navigator 3 [Source:HGNC Symbol;Acc:HGNC:15998]	1	2	0	6
ENSG00000067829	IDH3G	2699	X	153785766	153794512	isocitrate dehydrogenase (NAD(+)) 3 non-catalytic subunit gamma [Source:HGNC Symbol;Acc:HGNC:5386]	2818	2779	3337	3129
ENSG00000067840	PDZD4	4341	X	153802166	153830565	PDZ domain containing 4 [Source:HGNC Symbol;Acc:HGNC:21167]	17	9	46	55
ENSG00000067842	ATP2B3	10469	X	153517642	153582939	ATPase plasma membrane Ca2+ transporting 3 [Source:HGNC Symbol;Acc:HGNC:816]	0	0	0	11
ENSG00000067900	ROCK1	13369	18	20944612	21111813	Rho associated coiled-coil containing protein kinase 1 [Source:HGNC Symbol;Acc:HGNC:10251]	3997	3962	5058	5093
ENSG00000067955	CBFB	4652	16	67028984	67101058	core-binding factor subunit beta [Source:HGNC Symbol;Acc:HGNC:1539]	2446	3135	3390	2887
ENSG00000067992	PDK3	17456	X	24465244	24550466	pyruvate dehydrogenase kinase 3 [Source:HGNC Symbol;Acc:HGNC:8811]	2273	2178	3996	3626
ENSG00000068001	HYAL2	4421	3	50317790	50322782	hyaluronidase 2 [Source:HGNC Symbol;Acc:HGNC:5321]	665	637	646	488
ENSG00000068024	HDAC4	14179	2	239048168	239401654	histone deacetylase 4 [Source:HGNC Symbol;Acc:HGNC:14063]	1120	881	1274	1355
ENSG00000068028	RASSF1	3683	3	50329782	50340980	Ras association domain family member 1 [Source:HGNC Symbol;Acc:HGNC:9882]	2154	2036	1963	1852
ENSG00000068078	FGFR3	4848	4	1793293	1808872	fibroblast growth factor receptor 3 [Source:HGNC Symbol;Acc:HGNC:3690]	73	138	112	115
ENSG00000068079	IFI35	1958	17	43006740	43014456	interferon induced protein 35 [Source:HGNC Symbol;Acc:HGNC:5399]	346	293	320	256
ENSG00000068097	HEATR6	7043	17	60041008	60078922	HEAT repeat containing 6 [Source:HGNC Symbol;Acc:HGNC:24076]	535	462	567	583
ENSG00000068120	COASY	4032	17	42561467	42566277	Coenzyme A synthase [Source:HGNC Symbol;Acc:HGNC:29932]	1666	1488	1634	1822
ENSG00000068137	PLEKHH3	4803	17	42667914	42676994	pleckstrin homology, MyTH4 and FERM domain containing H3 [Source:HGNC Symbol;Acc:HGNC:26105]	2631	2767	2730	2394
ENSG00000068305	MEF2A	7128	15	99565417	99716488	myocyte enhancer factor 2A [Source:HGNC Symbol;Acc:HGNC:6993]	1603	1474	1804	1705
ENSG00000068308	OTUD5	3333	X	48922024	48958386	OTU deubiquitinase 5 [Source:HGNC Symbol;Acc:HGNC:25402]	4344	3658	3229	3313
ENSG00000068323	TFE3	4207	X	49028726	49043410	transcription factor binding to IGHM enhancer 3 [Source:HGNC Symbol;Acc:HGNC:11752]	5163	4693	4951	4879
ENSG00000068354	TBC1D25	3966	X	48539714	48562609	TBC1 domain family member 25 [Source:HGNC Symbol;Acc:HGNC:8092]	1310	1100	1148	1080
ENSG00000068366	ACSL4	9971	X	109624244	109733403	acyl-CoA synthetase long chain family member 4 [Source:HGNC Symbol;Acc:HGNC:3571]	1507	1461	1538	1530
ENSG00000068383	INPP5A	3739	10	132537787	132783480	inositol polyphosphate-5-phosphatase A [Source:HGNC Symbol;Acc:HGNC:6076]	1043	848	629	730
ENSG00000068394	GPKOW	1658	X	49113407	49123735	G-patch domain and KOW motifs [Source:HGNC Symbol;Acc:HGNC:30677]	1380	1443	1505	1406
ENSG00000068400	GRIPAP1	16204	X	48973720	49002265	GRIP1 associated protein 1 [Source:HGNC Symbol;Acc:HGNC:18706]	2085	2100	2069	2111
ENSG00000068438	FTSJ1	2872	X	48476021	48486364	FtsJ RNA 2'-O-methyltransferase 1 [Source:HGNC Symbol;Acc:HGNC:13254]	3284	3119	3617	3136
ENSG00000068489	PRR11	6743	17	59155732	59206709	proline rich 11 [Source:HGNC Symbol;Acc:HGNC:25619]	3093	2941	3859	3812
ENSG00000068615	REEP1	6937	2	86213993	86338083	receptor accessory protein 1 [Source:HGNC Symbol;Acc:HGNC:25786]	242	339	456	435
ENSG00000068650	ATP11A	14024	13	112690038	112887168	ATPase phospholipid transporting 11A [Source:HGNC Symbol;Acc:HGNC:13552]	8617	8221	7625	6472
ENSG00000068654	POLR1A	19694	2	86020216	86106155	RNA polymerase I subunit A [Source:HGNC Symbol;Acc:HGNC:17264]	6881	5916	6549	5878
ENSG00000068697	LAPTM4A	1546	2	20032650	20051628	lysosomal protein transmembrane 4 alpha [Source:HGNC Symbol;Acc:HGNC:6924]	5156	6271	6144	5275
ENSG00000068724	TTC7A	13446	2	46915869	47076137	tetratricopeptide repeat domain 7A [Source:HGNC Symbol;Acc:HGNC:19750]	4900	4156	3614	3698
ENSG00000068745	IP6K2	5624	3	48688003	48740353	inositol hexakisphosphate kinase 2 [Source:HGNC Symbol;Acc:HGNC:17313]	1109	1399	1091	1052
ENSG00000068781	STON1-GTF2A1L	4294	2	48529925	48776517	STON1-GTF2A1L readthrough [Source:HGNC Symbol;Acc:HGNC:30651]	0	0	0	1
ENSG00000068784	SRBD1	5045	2	45388680	45612165	S1 RNA binding domain 1 [Source:HGNC Symbol;Acc:HGNC:25521]	613	700	997	849
ENSG00000068796	KIF2A	13050	5	62306162	62391025	kinesin family member 2A [Source:HGNC Symbol;Acc:HGNC:6318]	2629	2733	3041	3071
ENSG00000068831	RASGRP2	6084	11	64726911	64745456	RAS guanyl releasing protein 2 [Source:HGNC Symbol;Acc:HGNC:9879]	20	36	4	8
ENSG00000068878	PSME4	10392	2	53864069	53970993	proteasome activator subunit 4 [Source:HGNC Symbol;Acc:HGNC:20635]	8823	8267	9884	9901
ENSG00000068885	IFT80	7080	3	160256986	160399880	intraflagellar transport 80 [Source:HGNC Symbol;Acc:HGNC:29262]	284	339	334	354
ENSG00000068903	SIRT2	6206	19	38878555	38899862	sirtuin 2 [Source:HGNC Symbol;Acc:HGNC:10886]	1945	1891	1636	1495
ENSG00000068912	ERLEC1	16419	2	53787009	53833038	endoplasmic reticulum lectin 1 [Source:HGNC Symbol;Acc:HGNC:25222]	1559	1676	1696	1626
ENSG00000068971	PPP2R5B	3360	11	64917553	64934475	protein phosphatase 2 regulatory subunit B'beta [Source:HGNC Symbol;Acc:HGNC:9310]	1825	1827	1119	1119
ENSG00000068976	PYGM	4658	11	64746389	64759974	glycogen phosphorylase, muscle associated [Source:HGNC Symbol;Acc:HGNC:9726]	4	16	10	9
ENSG00000068985	PAGE1	659	X	49687447	49695984	PAGE family member 1 [Source:HGNC Symbol;Acc:HGNC:4107]	0	0	0	0
ENSG00000069011	PITX1	3442	5	135027734	135034813	paired like homeodomain 1 [Source:HGNC Symbol;Acc:HGNC:9004]	8737	7559	5623	5841
ENSG00000069020	MAST4	14654	5	66596380	67169593	microtubule associated serine/threonine kinase family member 4 [Source:HGNC Symbol;Acc:HGNC:19037]	705	450	452	429
ENSG00000069122	ADGRF5	6601	6	46852522	46954943	adhesion G protein-coupled receptor F5 [Source:HGNC Symbol;Acc:HGNC:19030]	395	376	112	99
ENSG00000069188	SDK2	11963	17	73334384	73644445	sidekick cell adhesion molecule 2 [Source:HGNC Symbol;Acc:HGNC:19308]	3	8	14	5
ENSG00000069248	NUP133	6081	1	229440259	229508341	nucleoporin 133 [Source:HGNC Symbol;Acc:HGNC:18016]	3813	3878	3553	3586
ENSG00000069275	NUCKS1	6449	1	205712822	205750182	nuclear casein kinase and cyclin dependent kinase substrate 1 [Source:HGNC Symbol;Acc:HGNC:29923]	12564	14555	27067	24894
ENSG00000069329	VPS35	9733	16	46656132	46689518	VPS35 retromer complex component [Source:HGNC Symbol;Acc:HGNC:13487]	10308	9846	10115	9885
ENSG00000069345	DNAJA2	4951	16	46955362	46973674	DnaJ heat shock protein family (Hsp40) member A2 [Source:HGNC Symbol;Acc:HGNC:14884]	6404	6529	6735	6802
ENSG00000069399	BCL3	3094	19	44747705	44760044	BCL3 transcription coactivator [Source:HGNC Symbol;Acc:HGNC:998]	3932	3606	3797	3412
ENSG00000069424	KCNAB2	17212	1	5990927	6101193	potassium voltage-gated channel subfamily A regulatory beta subunit 2 [Source:HGNC Symbol;Acc:HGNC:6229]	231	194	324	337
ENSG00000069482	GAL	1300	11	68683779	68691175	galanin and GMAP prepropeptide [Source:HGNC Symbol;Acc:HGNC:4114]	47	76	72	64
ENSG00000069493	CLEC2D	6955	12	9664969	9699553	C-type lectin domain family 2 member D [Source:HGNC Symbol;Acc:HGNC:14351]	96	123	94	147
ENSG00000069509	FUNDC1	1257	X	44523639	44542859	FUN14 domain containing 1 [Source:HGNC Symbol;Acc:HGNC:28746]	230	313	388	341
ENSG00000069667	RORA	17023	15	60488284	61229302	RAR related orphan receptor A [Source:HGNC Symbol;Acc:HGNC:10258]	16	22	18	10
ENSG00000069696	DRD4	1501	11	637269	640706	dopamine receptor D4 [Source:HGNC Symbol;Acc:HGNC:3025]	17	19	39	33
ENSG00000069702	TGFBR3	8577	1	91680343	91906335	transforming growth factor beta receptor 3 [Source:HGNC Symbol;Acc:HGNC:11774]	670	610	566	529
ENSG00000069764	PLA2G10	752	16	14672548	14694308	phospholipase A2 group X [Source:HGNC Symbol;Acc:HGNC:9029]	0	0	2	3
ENSG00000069812	HES2	5407	1	6412418	6424670	hes family bHLH transcription factor 2 [Source:HGNC Symbol;Acc:HGNC:16005]	881	906	1777	1798
ENSG00000069849	ATP1B3	2617	3	141876124	141926549	ATPase Na+/K+ transporting subunit beta 3 [Source:HGNC Symbol;Acc:HGNC:806]	4335	4577	4760	4423
ENSG00000069869	NEDD4	9036	15	55826922	55993660	NEDD4 E3 ubiquitin protein ligase [Source:HGNC Symbol;Acc:HGNC:7727]	3977	4216	3437	3185
ENSG00000069943	PIGB	4542	15	55318960	55355648	phosphatidylinositol glycan anchor biosynthesis class B [Source:HGNC Symbol;Acc:HGNC:8959]	355	424	300	207
ENSG00000069956	MAPK6	6592	15	51952106	52067375	mitogen-activated protein kinase 6 [Source:HGNC Symbol;Acc:HGNC:6879]	2026	2210	1594	1403
ENSG00000069966	GNB5	13330	15	52115100	52191392	G protein subunit beta 5 [Source:HGNC Symbol;Acc:HGNC:4401]	660	662	866	807
ENSG00000069974	RAB27A	11345	15	55202966	55319113	RAB27A, member RAS oncogene family [Source:HGNC Symbol;Acc:HGNC:9766]	385	365	656	717
ENSG00000069998	HDHD5	4936	22	17137511	17165287	haloacid dehalogenase like hydrolase domain containing 5 [Source:HGNC Symbol;Acc:HGNC:1843]	1471	1798	1639	1443
ENSG00000070010	UFD1	8722	22	19449911	19479202	ubiquitin recognition factor in ER associated degradation 1 [Source:HGNC Symbol;Acc:HGNC:12520]	2376	2279	2521	2622
ENSG00000070018	LRP6	10369	12	12116025	12267044	LDL receptor related protein 6 [Source:HGNC Symbol;Acc:HGNC:6698]	2299	2157	2214	1999
ENSG00000070019	GUCY2C	4191	12	14612632	14696599	guanylate cyclase 2C [Source:HGNC Symbol;Acc:HGNC:4688]	3	2	9	6
ENSG00000070031	SCT	526	11	626309	627181	secretin [Source:HGNC Symbol;Acc:HGNC:10607]	4	2	3	19
ENSG00000070047	PHRF1	5785	11	576470	612222	PHD and ring finger domains 1 [Source:HGNC Symbol;Acc:HGNC:24351]	4095	3164	3144	3340
ENSG00000070061	ELP1	24261	9	108866898	108934328	elongator acetyltransferase complex subunit 1 [Source:HGNC Symbol;Acc:HGNC:5959]	2074	2135	2034	2104
ENSG00000070081	NUCB2	9023	11	17208153	17349980	nucleobindin 2 [Source:HGNC Symbol;Acc:HGNC:8044]	643	594	1166	1098
ENSG00000070087	PFN2	3608	3	149964904	150050788	profilin 2 [Source:HGNC Symbol;Acc:HGNC:8882]	1142	1254	1393	1272
ENSG00000070159	PTPN3	9995	9	109375466	109498313	protein tyrosine phosphatase non-receptor type 3 [Source:HGNC Symbol;Acc:HGNC:9655]	3240	3364	3401	3133
ENSG00000070182	SPTB	14796	14	64746283	64879907	spectrin beta, erythrocytic [Source:HGNC Symbol;Acc:HGNC:11274]	273	220	494	431
ENSG00000070190	DAPP1	4590	4	99816827	99870190	dual adaptor of phosphotyrosine and 3-phosphoinositides 1 [Source:HGNC Symbol;Acc:HGNC:16500]	388	518	373	365
ENSG00000070193	FGF10	6399	5	44300247	44389706	fibroblast growth factor 10 [Source:HGNC Symbol;Acc:HGNC:3666]	0	0	0	0
ENSG00000070214	SLC44A1	12373	9	105244622	105439171	solute carrier family 44 member 1 [Source:HGNC Symbol;Acc:HGNC:18798]	2917	3023	4001	3990
ENSG00000070269	TMEM260	8072	14	56488354	56650606	transmembrane protein 260 [Source:HGNC Symbol;Acc:HGNC:20185]	761	819	860	770
ENSG00000070366	SMG6	10568	17	2059839	2303785	SMG6 nonsense mediated mRNA decay factor [Source:HGNC Symbol;Acc:HGNC:17809]	1167	1058	1325	1296
ENSG00000070367	EXOC5	12472	14	57200507	57268905	exocyst complex component 5 [Source:HGNC Symbol;Acc:HGNC:10696]	4763	5807	6428	5965
ENSG00000070371	CLTCL1	10052	22	19179473	19291719	clathrin heavy chain like 1 [Source:HGNC Symbol;Acc:HGNC:2093]	408	429	474	478
ENSG00000070388	FGF22	2780	19	639879	644373	fibroblast growth factor 22 [Source:HGNC Symbol;Acc:HGNC:3679]	14	11	8	19
ENSG00000070404	FSTL3	3033	19	676392	683392	follistatin like 3 [Source:HGNC Symbol;Acc:HGNC:3973]	194	158	177	136
ENSG00000070413	DGCR2	5605	22	19036282	19122454	DiGeorge syndrome critical region gene 2 [Source:HGNC Symbol;Acc:HGNC:2845]	7448	5810	5777	5691
ENSG00000070423	RNF126	3452	19	647526	663233	ring finger protein 126 [Source:HGNC Symbol;Acc:HGNC:21151]	2391	2254	2519	2187
ENSG00000070444	MNT	8701	17	2384073	2401104	MAX network transcriptional repressor [Source:HGNC Symbol;Acc:HGNC:7188]	703	688	909	917
ENSG00000070476	ZXDC	7329	3	126437601	126475891	ZXD family zinc finger C [Source:HGNC Symbol;Acc:HGNC:28160]	1906	1824	2152	2150
ENSG00000070495	JMJD6	5969	17	76712832	76726799	jumonji domain containing 6, arginine demethylase and lysine hydroxylase [Source:HGNC Symbol;Acc:HGNC:19355]	1296	1327	1180	1194
ENSG00000070501	POLB	4106	8	42338454	42371808	DNA polymerase beta [Source:HGNC Symbol;Acc:HGNC:9174]	495	584	611	623
ENSG00000070540	WIPI1	3403	17	68420948	68457513	WD repeat domain, phosphoinositide interacting 1 [Source:HGNC Symbol;Acc:HGNC:25471]	736	631	604	707
ENSG00000070601	FRMPD1	5913	9	37650954	37746904	FERM and PDZ domain containing 1 [Source:HGNC Symbol;Acc:HGNC:29159]	466	417	224	280
ENSG00000070610	GBA2	4803	9	35736866	35749228	glucosylceramidase beta 2 [Source:HGNC Symbol;Acc:HGNC:18986]	6883	7281	6897	6525
ENSG00000070614	NDST1	9510	5	150485818	150558211	N-deacetylase and N-sulfotransferase 1 [Source:HGNC Symbol;Acc:HGNC:7680]	13688	10511	12335	12283
ENSG00000070669	ASNS	4896	7	97851677	97872542	asparagine synthetase (glutamine-hydrolyzing) [Source:HGNC Symbol;Acc:HGNC:753]	15	23	20	18
ENSG00000070718	AP3M2	6276	8	42152946	42171673	adaptor related protein complex 3 subunit mu 2 [Source:HGNC Symbol;Acc:HGNC:570]	373	471	482	389
ENSG00000070729	CNGB1	7310	16	57882340	57971128	cyclic nucleotide gated channel subunit beta 1 [Source:HGNC Symbol;Acc:HGNC:2151]	126	119	72	57
ENSG00000070731	ST6GALNAC2	3002	17	76565377	76586956	ST6 N-acetylgalactosaminide alpha-2,6-sialyltransferase 2 [Source:HGNC Symbol;Acc:HGNC:10867]	110	90	54	50
ENSG00000070756	PABPC1	9546	8	100685816	100722809	poly(A) binding protein cytoplasmic 1 [Source:HGNC Symbol;Acc:HGNC:8554]	69308	63475	90970	90400
ENSG00000070759	TESK2	3319	1	45343883	45491163	testis associated actin remodelling kinase 2 [Source:HGNC Symbol;Acc:HGNC:11732]	170	161	150	139
ENSG00000070761	CFAP20	2302	16	58113592	58129381	cilia and flagella associated protein 20 [Source:HGNC Symbol;Acc:HGNC:29523]	1229	1510	1262	1303
ENSG00000070770	CSNK2A2	10363	16	58157907	58198106	casein kinase 2 alpha 2 [Source:HGNC Symbol;Acc:HGNC:2459]	4188	4224	3195	2900
ENSG00000070778	PTPN21	7670	14	88465778	88555007	protein tyrosine phosphatase non-receptor type 21 [Source:HGNC Symbol;Acc:HGNC:9651]	958	994	922	967
ENSG00000070785	EIF2B3	3411	1	44850522	44986722	eukaryotic translation initiation factor 2B subunit gamma [Source:HGNC Symbol;Acc:HGNC:3259]	1301	1464	1414	1487
ENSG00000070808	CAMK2A	9481	5	150219491	150290093	calcium/calmodulin dependent protein kinase II alpha [Source:HGNC Symbol;Acc:HGNC:1460]	2	8	2	2
ENSG00000070814	TCOF1	11439	5	150357629	150400308	treacle ribosome biogenesis factor 1 [Source:HGNC Symbol;Acc:HGNC:11654]	8282	6704	5693	6057
ENSG00000070831	CDC42	24398	1	22052627	22101360	cell division cycle 42 [Source:HGNC Symbol;Acc:HGNC:1736]	23	60	62	83
ENSG00000070882	OSBPL3	8089	7	24796540	24981634	oxysterol binding protein like 3 [Source:HGNC Symbol;Acc:HGNC:16370]	2586	2683	2264	2331
ENSG00000070886	EPHA8	5434	1	22563489	22603595	EPH receptor A8 [Source:HGNC Symbol;Acc:HGNC:3391]	5	2	4	9
ENSG00000070915	SLC12A3	6180	16	56865207	56915850	solute carrier family 12 member 3 [Source:HGNC Symbol;Acc:HGNC:10912]	2	8	0	4
ENSG00000070950	RAD18	6984	3	8775402	8963773	RAD18 E3 ubiquitin protein ligase [Source:HGNC Symbol;Acc:HGNC:18278]	1311	1166	1491	1501
ENSG00000070961	ATP2B1	9523	12	89588049	89709366	ATPase plasma membrane Ca2+ transporting 1 [Source:HGNC Symbol;Acc:HGNC:814]	2342	2665	2209	2039
ENSG00000071051	NCK2	2975	2	105744912	105894274	NCK adaptor protein 2 [Source:HGNC Symbol;Acc:HGNC:7665]	4094	4005	4080	3897
ENSG00000071054	MAP4K4	11958	2	101696850	101894690	mitogen-activated protein kinase kinase kinase kinase 4 [Source:HGNC Symbol;Acc:HGNC:6866]	2961	2436	2750	2865
ENSG00000071073	MGAT4A	9636	2	98619106	98731132	alpha-1,3-mannosyl-glycoprotein 4-beta-N-acetylglucosaminyltransferase A [Source:HGNC Symbol;Acc:HGNC:7047]	5155	5073	9703	9201
ENSG00000071082	RPL31	5277	2	101002229	101024032	ribosomal protein L31 [Source:HGNC Symbol;Acc:HGNC:10334]	6661	8565	7996	7742
ENSG00000071127	WDR1	18461	4	10068089	10116972	WD repeat domain 1 [Source:HGNC Symbol;Acc:HGNC:12754]	10591	10436	10857	10507
ENSG00000071189	SNX13	16418	7	17790761	17940501	sorting nexin 13 [Source:HGNC Symbol;Acc:HGNC:21335]	1481	1685	1802	1782
ENSG00000071205	ARHGAP10	10755	4	147732063	148072776	Rho GTPase activating protein 10 [Source:HGNC Symbol;Acc:HGNC:26099]	519	500	1046	1018
ENSG00000071242	RPS6KA2	8251	6	166409364	166906451	ribosomal protein S6 kinase A2 [Source:HGNC Symbol;Acc:HGNC:10431]	5168	4656	3954	3424
ENSG00000071243	ING3	5200	7	120950763	120977216	inhibitor of growth family member 3 [Source:HGNC Symbol;Acc:HGNC:14587]	337	407	453	483
ENSG00000071246	VASH1	7223	14	76761468	76783015	vasohibin 1 [Source:HGNC Symbol;Acc:HGNC:19964]	2	4	9	8
ENSG00000071282	LMCD1	9025	3	8501807	8574668	LIM and cysteine rich domains 1 [Source:HGNC Symbol;Acc:HGNC:6633]	22	20	40	11
ENSG00000071462	BUD23	1201	7	73683597	73698212	BUD23 rRNA methyltransferase and ribosome maturation factor [Source:HGNC Symbol;Acc:HGNC:16405]	2486	2572	2886	2658
ENSG00000071537	SEL1L	9553	14	81471547	81533853	SEL1L adaptor subunit of ERAD E3 ubiquitin ligase [Source:HGNC Symbol;Acc:HGNC:10717]	2865	2504	2842	2711
ENSG00000071539	TRIP13	3319	5	892884	919357	thyroid hormone receptor interactor 13 [Source:HGNC Symbol;Acc:HGNC:12307]	3048	3300	3646	3265
ENSG00000071553	ATP6AP1	5683	X	154428633	154436516	ATPase H+ transporting accessory protein 1 [Source:HGNC Symbol;Acc:HGNC:868]	9499	8476	9344	9001
ENSG00000071564	TCF3	6368	19	1609291	1652615	transcription factor 3 [Source:HGNC Symbol;Acc:HGNC:11633]	8135	7059	4800	4513
ENSG00000071575	TRIB2	4567	2	12716910	12742734	tribbles pseudokinase 2 [Source:HGNC Symbol;Acc:HGNC:30809]	6118	5340	6312	6081
ENSG00000071626	DAZAP1	9201	19	1407569	1435687	DAZ associated protein 1 [Source:HGNC Symbol;Acc:HGNC:2683]	4733	5121	6654	6866
ENSG00000071655	MBD3	7909	19	1573596	1592865	methyl-CpG binding domain protein 3 [Source:HGNC Symbol;Acc:HGNC:6918]	1992	1955	2903	2944
ENSG00000071794	HLTF	6024	3	149030127	149086554	helicase like transcription factor [Source:HGNC Symbol;Acc:HGNC:11099]	1841	1895	2491	2337
ENSG00000071859	FAM50A	2552	X	154444141	154450654	family with sequence similarity 50 member A [Source:HGNC Symbol;Acc:HGNC:18786]	6154	5429	5507	5592
ENSG00000071889	FAM3A	5098	X	154506159	154516242	FAM3 metabolism regulating signaling molecule A [Source:HGNC Symbol;Acc:HGNC:13749]	4653	3967	3701	3689
ENSG00000071894	CPSF1	6058	8	144393229	144409335	cleavage and polyadenylation specific factor 1 [Source:HGNC Symbol;Acc:HGNC:2324]	3612	3732	4630	4306
ENSG00000071909	MYO3B	8236	2	170178145	170655171	myosin IIIB [Source:HGNC Symbol;Acc:HGNC:15576]	0	0	0	1
ENSG00000071967	CYBRD1	5172	2	171522247	171558129	cytochrome b reductase 1 [Source:HGNC Symbol;Acc:HGNC:20797]	765	928	914	997
ENSG00000071994	PDCD2	6476	6	170575295	170584692	programmed cell death 2 [Source:HGNC Symbol;Acc:HGNC:8762]	3568	4572	4386	4061
ENSG00000072042	RDH11	5498	14	67676800	67695793	retinol dehydrogenase 11 [Source:HGNC Symbol;Acc:HGNC:17964]	1818	1914	2291	2072
ENSG00000072062	PRKACA	7330	19	14091688	14118084	protein kinase cAMP-activated catalytic subunit alpha [Source:HGNC Symbol;Acc:HGNC:9380]	5458	5227	9285	8639
ENSG00000072071	ADGRL1	8487	19	14147743	14206187	adhesion G protein-coupled receptor L1 [Source:HGNC Symbol;Acc:HGNC:20973]	10601	8810	10894	10242
ENSG00000072110	ACTN1	14320	14	68874128	68979440	actinin alpha 1 [Source:HGNC Symbol;Acc:HGNC:163]	29517	26098	16100	15848
ENSG00000072121	ZFYVE26	15884	14	67727374	67816590	zinc finger FYVE-type containing 26 [Source:HGNC Symbol;Acc:HGNC:20761]	1554	1122	1548	1380
ENSG00000072134	EPN2	8492	17	19215615	19336715	epsin 2 [Source:HGNC Symbol;Acc:HGNC:18639]	811	783	782	761
ENSG00000072135	PTPN18	5732	2	130356045	130375405	protein tyrosine phosphatase non-receptor type 18 [Source:HGNC Symbol;Acc:HGNC:9649]	2991	2672	2959	3070
ENSG00000072163	LIMS2	8731	2	127638381	127681786	LIM zinc finger domain containing 2 [Source:HGNC Symbol;Acc:HGNC:16084]	361	260	121	136
ENSG00000072182	ASIC4	5250	2	219514170	219538772	acid sensing ion channel subunit family member 4 [Source:HGNC Symbol;Acc:HGNC:21263]	6	0	0	2
ENSG00000072195	SPEG	17066	2	219434843	219493629	striated muscle enriched protein kinase [Source:HGNC Symbol;Acc:HGNC:16901]	1216	1232	995	1032
ENSG00000072201	LNX1	5624	4	53459301	53701405	ligand of numb-protein X 1 [Source:HGNC Symbol;Acc:HGNC:6657]	100	98	87	96
ENSG00000072210	ALDH3A2	15331	17	19648136	19685760	aldehyde dehydrogenase 3 family member A2 [Source:HGNC Symbol;Acc:HGNC:403]	3564	3762	4320	4378
ENSG00000072274	TFRC	17376	3	196012511	196082153	transferrin receptor [Source:HGNC Symbol;Acc:HGNC:11763]	13899	15164	11536	10380
ENSG00000072310	SREBF1	8234	17	17810399	17837002	sterol regulatory element binding transcription factor 1 [Source:HGNC Symbol;Acc:HGNC:11289]	1425	1386	2660	2407
ENSG00000072364	AFF4	11281	5	132875395	132963634	ALF transcription elongation factor 4 [Source:HGNC Symbol;Acc:HGNC:17869]	7770	7084	8452	7777
ENSG00000072401	UBE2D1	3480	10	58334979	58370751	ubiquitin conjugating enzyme E2 D1 [Source:HGNC Symbol;Acc:HGNC:12474]	1395	1744	1116	1055
ENSG00000072415	PALS1	14825	14	67240713	67336061	protein associated with LIN7 1, MAGUK p55 family member [Source:HGNC Symbol;Acc:HGNC:18669]	2234	2138	2177	1904
ENSG00000072422	RHOBTB1	4779	10	60869438	61001440	Rho related BTB domain containing 1 [Source:HGNC Symbol;Acc:HGNC:18738]	475	451	285	233
ENSG00000072501	SMC1A	10830	X	53374149	53422728	structural maintenance of chromosomes 1A [Source:HGNC Symbol;Acc:HGNC:11111]	6801	6303	11578	11556
ENSG00000072506	HSD17B10	2822	X	53431258	53434370	hydroxysteroid 17-beta dehydrogenase 10 [Source:HGNC Symbol;Acc:HGNC:4800]	3065	3225	2761	2603
ENSG00000072518	MARK2	12010	11	63838928	63911020	microtubule affinity regulating kinase 2 [Source:HGNC Symbol;Acc:HGNC:3332]	4751	4366	5504	5870
ENSG00000072571	HMMR	3932	5	163460203	163491941	hyaluronan mediated motility receptor [Source:HGNC Symbol;Acc:HGNC:5012]	1471	1883	2341	2114
ENSG00000072609	CHFR	17113	12	132822187	132956304	checkpoint with forkhead and ring finger domains [Source:HGNC Symbol;Acc:HGNC:20455]	2343	2409	1778	1840
ENSG00000072682	P4HA2	10128	5	132190147	132295315	prolyl 4-hydroxylase subunit alpha 2 [Source:HGNC Symbol;Acc:HGNC:8547]	954	1076	919	791
ENSG00000072694	FCGR2B	6655	1	161663143	161678654	Fc gamma receptor IIb [Source:HGNC Symbol;Acc:HGNC:3618]	4	0	0	0
ENSG00000072736	NFATC3	8806	16	68084751	68229259	nuclear factor of activated T cells 3 [Source:HGNC Symbol;Acc:HGNC:7777]	1433	1034	1630	1772
ENSG00000072756	TRNT1	14503	3	3126933	3153435	tRNA nucleotidyl transferase 1 [Source:HGNC Symbol;Acc:HGNC:17341]	663	740	666	641
ENSG00000072778	ACADVL	4820	17	7217125	7225266	acyl-CoA dehydrogenase very long chain [Source:HGNC Symbol;Acc:HGNC:92]	9840	10578	11044	11255
ENSG00000072786	STK10	8915	5	172042079	172188224	serine/threonine kinase 10 [Source:HGNC Symbol;Acc:HGNC:11388]	2769	2644	2308	2168
ENSG00000072803	FBXW11	5577	5	171861549	172006873	F-box and WD repeat domain containing 11 [Source:HGNC Symbol;Acc:HGNC:13607]	4519	4630	5746	5458
ENSG00000072818	ACAP1	7420	17	7336529	7351477	ArfGAP with coiled-coil, ankyrin repeat and PH domains 1 [Source:HGNC Symbol;Acc:HGNC:16467]	19	29	19	45
ENSG00000072832	CRMP1	5869	4	5748084	5893086	collapsin response mediator protein 1 [Source:HGNC Symbol;Acc:HGNC:2365]	0	2	0	0
ENSG00000072840	EVC	7144	4	5711201	5814305	EvC ciliary complex subunit 1 [Source:HGNC Symbol;Acc:HGNC:3497]	2	0	0	0
ENSG00000072849	DERL2	6383	17	5471254	5486811	derlin 2 [Source:HGNC Symbol;Acc:HGNC:17943]	911	1187	1214	953
ENSG00000072858	SIDT1	7798	3	113532555	113629575	SID1 transmembrane family member 1 [Source:HGNC Symbol;Acc:HGNC:25967]	193	154	262	193
ENSG00000072864	NDE1	8217	16	15643267	15734691	nudE neurodevelopment protein 1 [Source:HGNC Symbol;Acc:HGNC:17619]	883	963	1115	1153
ENSG00000072952	IRAG1	7700	11	10573091	10693988	inositol 1,4,5-triphosphate receptor associated 1 [Source:HGNC Symbol;Acc:HGNC:7237]	41	27	21	5
ENSG00000072954	TMEM38A	2987	19	16661139	16690023	transmembrane protein 38A [Source:HGNC Symbol;Acc:HGNC:28462]	1815	1865	2436	2181
ENSG00000072958	AP1M1	14094	19	16197854	16245906	adaptor related protein complex 1 subunit mu 1 [Source:HGNC Symbol;Acc:HGNC:13667]	2416	2298	1751	1722
ENSG00000073008	PVR	10427	19	44643798	44666162	PVR cell adhesion molecule [Source:HGNC Symbol;Acc:HGNC:9705]	9473	8576	6959	6894
ENSG00000073050	XRCC1	2745	19	43543311	43580473	X-ray repair cross complementing 1 [Source:HGNC Symbol;Acc:HGNC:12828]	1301	1329	1538	1509
ENSG00000073060	SCARB1	14887	12	124776856	124882668	scavenger receptor class B member 1 [Source:HGNC Symbol;Acc:HGNC:1664]	487	409	546	607
ENSG00000073067	CYP2W1	2791	7	983181	989640	cytochrome P450 family 2 subfamily W member 1 [Source:HGNC Symbol;Acc:HGNC:20243]	5	5	9	15
ENSG00000073111	MCM2	4715	3	127598410	127622436	minichromosome maintenance complex component 2 [Source:HGNC Symbol;Acc:HGNC:6944]	1163	1122	2345	2398
ENSG00000073146	MOV10L1	6826	22	50090006	50161690	Mov10 like RISC complex RNA helicase 1 [Source:HGNC Symbol;Acc:HGNC:7201]	1	0	0	0
ENSG00000073150	PANX2	3103	22	50170731	50180295	pannexin 2 [Source:HGNC Symbol;Acc:HGNC:8600]	308	301	549	486
ENSG00000073169	SELENOO	2331	22	50201011	50217616	selenoprotein O [Source:HGNC Symbol;Acc:HGNC:30395]	1173	1297	1096	1108
ENSG00000073282	TP63	7479	3	189631389	189897276	tumor protein p63 [Source:HGNC Symbol;Acc:HGNC:15979]	241	292	24	56
ENSG00000073331	ALPK1	12326	4	112285509	112442621	alpha kinase 1 [Source:HGNC Symbol;Acc:HGNC:20917]	581	555	461	428
ENSG00000073350	LLGL2	7939	17	75525080	75575209	LLGL scribble cell polarity complex component 2 [Source:HGNC Symbol;Acc:HGNC:6629]	7403	6626	4559	4541
ENSG00000073417	PDE8A	8004	15	84980440	85139145	phosphodiesterase 8A [Source:HGNC Symbol;Acc:HGNC:8793]	2509	2578	1307	1285
ENSG00000073464	CLCN4	7562	X	10156975	10237660	chloride voltage-gated channel 4 [Source:HGNC Symbol;Acc:HGNC:2022]	422	367	237	300
ENSG00000073536	NLE1	5475	17	35128730	35142304	notchless homolog 1 [Source:HGNC Symbol;Acc:HGNC:19889]	789	754	734	870
ENSG00000073578	SDHA	8703	5	218303	257082	succinate dehydrogenase complex flavoprotein subunit A [Source:HGNC Symbol;Acc:HGNC:10680]	755	817	627	639
ENSG00000073584	SMARCE1	18470	17	40624962	40648654	SWI/SNF related, matrix associated, actin dependent regulator of chromatin, subfamily e, member 1 [Source:HGNC Symbol;Acc:HGNC:11109]	107	119	211	183
ENSG00000073598	FNDC8	1352	17	35121615	35130732	fibronectin type III domain containing 8 [Source:HGNC Symbol;Acc:HGNC:25286]	0	6	0	5
ENSG00000073605	GSDMB	5905	17	39904595	39919854	gasdermin B [Source:HGNC Symbol;Acc:HGNC:23690]	195	223	264	253
ENSG00000073614	KDM5A	12029	12	280057	389320	lysine demethylase 5A [Source:HGNC Symbol;Acc:HGNC:9886]	2334	2111	2739	2511
ENSG00000073670	ADAM11	4813	17	44758988	44781846	ADAM metallopeptidase domain 11 [Source:HGNC Symbol;Acc:HGNC:189]	14	14	47	37
ENSG00000073711	PPP2R3A	7785	3	135965728	136147894	protein phosphatase 2 regulatory subunit B''alpha [Source:HGNC Symbol;Acc:HGNC:9307]	2460	2214	2070	2121
ENSG00000073712	FERMT2	8463	14	52857268	52952435	FERM domain containing kindlin 2 [Source:HGNC Symbol;Acc:HGNC:15767]	3670	3539	4677	4567
ENSG00000073734	ABCB11	7715	2	168915498	169031324	ATP binding cassette subfamily B member 11 [Source:HGNC Symbol;Acc:HGNC:42]	0	0	0	5
ENSG00000073737	DHRS9	3750	2	169064789	169096167	dehydrogenase/reductase 9 [Source:HGNC Symbol;Acc:HGNC:16888]	4	0	2	0
ENSG00000073792	IGF2BP2	5330	3	185643130	185825042	insulin like growth factor 2 mRNA binding protein 2 [Source:HGNC Symbol;Acc:HGNC:28867]	1316	1203	1502	1314
ENSG00000073803	MAP3K13	12604	3	185282941	185489094	mitogen-activated protein kinase kinase kinase 13 [Source:HGNC Symbol;Acc:HGNC:6852]	694	687	749	744
ENSG00000073849	ST6GAL1	11142	3	186930325	187078553	ST6 beta-galactoside alpha-2,6-sialyltransferase 1 [Source:HGNC Symbol;Acc:HGNC:10860]	3940	3664	3807	3691
ENSG00000073905	VDAC1P1	848	X	80929500	80930347	voltage dependent anion channel 1 pseudogene 1 [Source:HGNC Symbol;Acc:HGNC:12671]	164	106	176	154
ENSG00000073910	FRY	18852	13	31846713	32299125	FRY microtubule binding protein [Source:HGNC Symbol;Acc:HGNC:20367]	2111	1850	1636	1641
ENSG00000073921	PICALM	6342	11	85957175	86069882	phosphatidylinositol binding clathrin assembly protein [Source:HGNC Symbol;Acc:HGNC:15514]	12173	12272	13504	12961
ENSG00000073969	NSF	9462	17	46590669	46757679	N-ethylmaleimide sensitive factor, vesicle fusing ATPase [Source:HGNC Symbol;Acc:HGNC:8016]	1293	1200	1554	1458
ENSG00000074047	GLI2	7720	2	120735623	120992653	GLI family zinc finger 2 [Source:HGNC Symbol;Acc:HGNC:4318]	10	4	4	2
ENSG00000074054	CLASP1	11004	2	121337776	121649476	cytoplasmic linker associated protein 1 [Source:HGNC Symbol;Acc:HGNC:17088]	4508	4119	3407	3348
ENSG00000074071	MRPS34	1092	16	1771890	1773150	mitochondrial ribosomal protein S34 [Source:HGNC Symbol;Acc:HGNC:16618]	1894	1969	1518	1519
ENSG00000074181	NOTCH3	9408	19	15159038	15200995	notch receptor 3 [Source:HGNC Symbol;Acc:HGNC:7883]	47968	42188	65846	61976
ENSG00000074201	CLNS1A	4581	11	77514936	77637794	chloride nucleotide-sensitive channel 1A [Source:HGNC Symbol;Acc:HGNC:2080]	1808	2199	2131	1800
ENSG00000074211	PPP2R2C	9366	4	6320578	6563600	protein phosphatase 2 regulatory subunit Bgamma [Source:HGNC Symbol;Acc:HGNC:9306]	0	2	8	0
ENSG00000074219	TEAD2	2980	19	49340595	49362457	TEA domain transcription factor 2 [Source:HGNC Symbol;Acc:HGNC:11715]	2074	2425	2520	2314
ENSG00000074266	EED	6995	11	86201212	86278813	embryonic ectoderm development [Source:HGNC Symbol;Acc:HGNC:3188]	1078	1374	1253	1233
ENSG00000074276	CDHR2	5397	5	176542511	176595974	cadherin related family member 2 [Source:HGNC Symbol;Acc:HGNC:18231]	28	35	28	46
ENSG00000074317	SNCB	2008	5	176620082	176630556	synuclein beta [Source:HGNC Symbol;Acc:HGNC:11140]	0	0	2	0
ENSG00000074319	TSG101	3558	11	18468336	18526951	tumor susceptibility 101 [Source:HGNC Symbol;Acc:HGNC:15971]	1521	1475	1464	1437
ENSG00000074356	NCBP3	14720	17	3802158	3846246	nuclear cap binding subunit 3 [Source:HGNC Symbol;Acc:HGNC:24612]	1425	1528	1417	1583
ENSG00000074370	ATP2A3	6893	17	3923870	3964464	ATPase sarcoplasmic/endoplasmic reticulum Ca2+ transporting 3 [Source:HGNC Symbol;Acc:HGNC:813]	388	328	442	483
ENSG00000074410	CA12	6998	15	63321378	63381846	carbonic anhydrase 12 [Source:HGNC Symbol;Acc:HGNC:1371]	4	8	9	6
ENSG00000074416	MGLL	11298	3	127689062	128052190	monoglyceride lipase [Source:HGNC Symbol;Acc:HGNC:17038]	8418	7272	2680	2380
ENSG00000074527	NTN4	4365	12	95657807	95791189	netrin 4 [Source:HGNC Symbol;Acc:HGNC:13658]	11193	11725	7393	6656
ENSG00000074582	BCS1L	3379	2	218658764	218663443	BCS1 homolog, ubiquinol-cytochrome c reductase complex chaperone [Source:HGNC Symbol;Acc:HGNC:1020]	556	772	737	821
ENSG00000074590	NUAK1	5924	12	106063345	106138954	NUAK family kinase 1 [Source:HGNC Symbol;Acc:HGNC:14311]	620	445	434	406
ENSG00000074603	DPP8	10211	15	65442463	65517704	dipeptidyl peptidase 8 [Source:HGNC Symbol;Acc:HGNC:16490]	1561	1644	2079	1866
ENSG00000074621	SLC24A1	9084	15	65611366	65660995	solute carrier family 24 member 1 [Source:HGNC Symbol;Acc:HGNC:10975]	298	238	300	246
ENSG00000074657	ZNF532	11754	18	58862600	58986480	zinc finger protein 532 [Source:HGNC Symbol;Acc:HGNC:30940]	2352	2150	3101	3041
ENSG00000074660	SCARF1	4954	17	1633858	1645744	scavenger receptor class F member 1 [Source:HGNC Symbol;Acc:HGNC:16820]	10	6	42	34
ENSG00000074695	LMAN1	6070	18	59327823	59359265	lectin, mannose binding 1 [Source:HGNC Symbol;Acc:HGNC:6631]	3799	4082	6026	5691
ENSG00000074696	HACD3	7094	15	65530418	65578349	3-hydroxyacyl-CoA dehydratase 3 [Source:HGNC Symbol;Acc:HGNC:24175]	4044	4332	3133	2915
ENSG00000074706	IPCEF1	8485	6	154154496	154356803	interaction protein for cytohesin exchange factors 1 [Source:HGNC Symbol;Acc:HGNC:21204]	19	13	7	12
ENSG00000074755	ZZEF1	15888	17	4004445	4143030	zinc finger ZZ-type and EF-hand domain containing 1 [Source:HGNC Symbol;Acc:HGNC:29027]	3512	2811	3913	3316
ENSG00000074800	ENO1	5216	1	8861000	8879190	enolase 1 [Source:HGNC Symbol;Acc:HGNC:3350]	54205	50906	60447	58915
ENSG00000074803	SLC12A1	12838	15	48178438	48304078	solute carrier family 12 member 1 [Source:HGNC Symbol;Acc:HGNC:10910]	0	0	1	0
ENSG00000074842	MYDGF	1670	19	4641374	4670362	myeloid derived growth factor [Source:HGNC Symbol;Acc:HGNC:16948]	1489	1688	1842	1689
ENSG00000074855	ANO8	5005	19	17323223	17334855	anoctamin 8 [Source:HGNC Symbol;Acc:HGNC:29329]	3664	3826	4006	3998
ENSG00000074935	TUBE1	7087	6	112070663	112087529	tubulin epsilon 1 [Source:HGNC Symbol;Acc:HGNC:20775]	664	950	979	1026
ENSG00000074964	ARHGEF10L	7954	1	17539698	17697874	Rho guanine nucleotide exchange factor 10 like [Source:HGNC Symbol;Acc:HGNC:25540]	1698	1368	1396	1219
ENSG00000074966	TXK	3466	4	48066393	48134250	TXK tyrosine kinase [Source:HGNC Symbol;Acc:HGNC:12434]	6	30	8	11
ENSG00000075073	TACR2	2922	10	69403903	69416918	tachykinin receptor 2 [Source:HGNC Symbol;Acc:HGNC:11527]	44	38	42	15
ENSG00000075089	ACTR6	3813	12	100199122	100241865	actin related protein 6 [Source:HGNC Symbol;Acc:HGNC:24025]	1089	1357	1356	1211
ENSG00000075131	TIPIN	2739	15	66336191	66386746	TIMELESS interacting protein [Source:HGNC Symbol;Acc:HGNC:30750]	180	225	349	250
ENSG00000075142	SRI	4226	7	88205115	88226993	sorcin [Source:HGNC Symbol;Acc:HGNC:11292]	3998	4980	3978	3438
ENSG00000075151	EIF4G3	11885	1	20806292	21177285	eukaryotic translation initiation factor 4 gamma 3 [Source:HGNC Symbol;Acc:HGNC:3298]	12	10	23	13
ENSG00000075188	NUP37	3488	12	102073103	102120120	nucleoporin 37 [Source:HGNC Symbol;Acc:HGNC:29929]	438	648	721	511
ENSG00000075213	SEMA3A	9259	7	83955777	84492724	semaphorin 3A [Source:HGNC Symbol;Acc:HGNC:10723]	324	327	432	403
ENSG00000075218	GTSE1	4113	22	46296870	46330810	G2 and S-phase expressed 1 [Source:HGNC Symbol;Acc:HGNC:13698]	1367	1653	2386	2383
ENSG00000075223	SEMA3C	6100	7	80742538	80922359	semaphorin 3C [Source:HGNC Symbol;Acc:HGNC:10725]	5083	5504	4214	4046
ENSG00000075234	TTC38	3578	22	46267961	46294008	tetratricopeptide repeat domain 38 [Source:HGNC Symbol;Acc:HGNC:26082]	1635	1387	1327	1302
ENSG00000075239	ACAT1	5869	11	108116695	108147603	acetyl-CoA acetyltransferase 1 [Source:HGNC Symbol;Acc:HGNC:93]	1560	1841	1372	1376
ENSG00000075240	GRAMD4	4901	22	46576012	46679790	GRAM domain containing 4 [Source:HGNC Symbol;Acc:HGNC:29113]	800	842	1558	1503
ENSG00000075275	CELSR1	16045	22	46360834	46537620	cadherin EGF LAG seven-pass G-type receptor 1 [Source:HGNC Symbol;Acc:HGNC:1850]	6122	4775	6279	5508
ENSG00000075290	WNT8B	2144	10	100463009	100483744	Wnt family member 8B [Source:HGNC Symbol;Acc:HGNC:12789]	0	2	0	0
ENSG00000075292	ZNF638	12474	2	71276561	71435069	zinc finger protein 638 [Source:HGNC Symbol;Acc:HGNC:17894]	3205	3491	4846	4673
ENSG00000075303	SLC25A40	5084	7	87833568	87876360	solute carrier family 25 member 40 [Source:HGNC Symbol;Acc:HGNC:29680]	491	737	814	818
ENSG00000075336	TIMM21	5197	18	74148523	74160531	translocase of inner mitochondrial membrane 21 [Source:HGNC Symbol;Acc:HGNC:25010]	883	960	904	739
ENSG00000075340	ADD2	12673	2	70607618	70768225	adducin 2 [Source:HGNC Symbol;Acc:HGNC:244]	19	19	39	5
ENSG00000075391	RASAL2	20172	1	178094104	178484147	RAS protein activator like 2 [Source:HGNC Symbol;Acc:HGNC:9874]	3829	3626	3557	3098
ENSG00000075399	VPS9D1	3340	16	89707134	89720898	VPS9 domain containing 1 [Source:HGNC Symbol;Acc:HGNC:13526]	608	632	1398	1395
ENSG00000075407	ZNF37A	13190	10	38094334	38150293	zinc finger protein 37A [Source:HGNC Symbol;Acc:HGNC:13102]	457	429	608	659
ENSG00000075413	MARK3	21530	14	103385377	103503831	microtubule affinity regulating kinase 3 [Source:HGNC Symbol;Acc:HGNC:6897]	1529	1508	2104	2244
ENSG00000075415	SLC25A3	8896	12	98593591	98606379	solute carrier family 25 member 3 [Source:HGNC Symbol;Acc:HGNC:10989]	10506	11015	11827	11187
ENSG00000075420	FNDC3B	13324	3	172039578	172401669	fibronectin type III domain containing 3B [Source:HGNC Symbol;Acc:HGNC:24670]	4721	4292	4602	4536
ENSG00000075426	FOSL2	7162	2	28392448	28417317	FOS like 2, AP-1 transcription factor subunit [Source:HGNC Symbol;Acc:HGNC:3798]	11135	10012	7873	7675
ENSG00000075429	CACNG5	10576	17	66835117	66894751	calcium voltage-gated channel auxiliary subunit gamma 5 [Source:HGNC Symbol;Acc:HGNC:1409]	0	0	0	0
ENSG00000075461	CACNG4	3583	17	66964707	67033398	calcium voltage-gated channel auxiliary subunit gamma 4 [Source:HGNC Symbol;Acc:HGNC:1408]	3	3	2	2
ENSG00000075539	FRYL	18165	4	48497357	48780322	FRY like transcription coactivator [Source:HGNC Symbol;Acc:HGNC:29127]	3094	2801	2636	2406
ENSG00000075568	TMEM131	13042	2	97756333	97995948	transmembrane protein 131 [Source:HGNC Symbol;Acc:HGNC:30366]	2883	2727	3052	3012
ENSG00000075618	FSCN1	3699	7	5592816	5606655	fascin actin-bundling protein 1 [Source:HGNC Symbol;Acc:HGNC:11148]	1466	1480	564	440
ENSG00000075624	ACTB	4405	7	5526409	5563902	actin beta [Source:HGNC Symbol;Acc:HGNC:132]	268144	260828	173813	154427
ENSG00000075643	MOCOS	6303	18	36187497	36272157	molybdenum cofactor sulfurase [Source:HGNC Symbol;Acc:HGNC:18234]	1645	1472	1426	1544
ENSG00000075651	PLD1	9954	3	171600404	171810950	phospholipase D1 [Source:HGNC Symbol;Acc:HGNC:9067]	913	805	580	599
ENSG00000075673	ATP12A	4424	13	24680408	24712472	ATPase H+/K+ transporting non-gastric alpha2 subunit [Source:HGNC Symbol;Acc:HGNC:13816]	0	0	0	0
ENSG00000075702	WDR62	12217	19	36054649	36105108	WD repeat domain 62 [Source:HGNC Symbol;Acc:HGNC:24502]	2769	2433	3908	3913
ENSG00000075711	DLG1	16552	3	197042560	197299330	discs large MAGUK scaffold protein 1 [Source:HGNC Symbol;Acc:HGNC:2900]	2761	2949	3477	3350
ENSG00000075785	RAB7A	7194	3	128693669	128825942	RAB7A, member RAS oncogene family [Source:HGNC Symbol;Acc:HGNC:9788]	9946	10087	8326	8296
ENSG00000075790	BCAP29	5625	7	107580246	107629170	B cell receptor associated protein 29 [Source:HGNC Symbol;Acc:HGNC:24131]	24	16	20	57
ENSG00000075826	SEC31B	7934	10	100486646	100519864	SEC31 homolog B, COPII coat complex component [Source:HGNC Symbol;Acc:HGNC:23197]	212	333	249	217
ENSG00000075856	SART3	7637	12	108522214	108561400	spliceosome associated factor 3, U4/U6 recycling protein [Source:HGNC Symbol;Acc:HGNC:16860]	1838	1814	1758	1790
ENSG00000075884	ARHGAP15	6127	2	143091362	143768352	Rho GTPase activating protein 15 [Source:HGNC Symbol;Acc:HGNC:21030]	4	2	4	0
ENSG00000075886	TUBA3D	1572	2	131476119	131482934	tubulin alpha 3d [Source:HGNC Symbol;Acc:HGNC:24071]	58	35	50	61
ENSG00000075891	PAX2	6582	10	100735396	100829944	paired box 2 [Source:HGNC Symbol;Acc:HGNC:8616]	8	13	6	10
ENSG00000075914	EXOSC7	4429	3	44975241	45036066	exosome component 7 [Source:HGNC Symbol;Acc:HGNC:28112]	539	716	543	544
ENSG00000075945	KIFAP3	4978	1	169921326	170085208	kinesin associated protein 3 [Source:HGNC Symbol;Acc:HGNC:17060]	622	762	838	710
ENSG00000075975	MKRN2	9783	3	12557057	12586208	makorin ring finger protein 2 [Source:HGNC Symbol;Acc:HGNC:7113]	801	905	731	711
ENSG00000076003	MCM6	4135	2	135839626	135876443	minichromosome maintenance complex component 6 [Source:HGNC Symbol;Acc:HGNC:6949]	3522	3854	5282	4502
ENSG00000076043	REXO2	3650	11	114439435	114450279	RNA exonuclease 2 [Source:HGNC Symbol;Acc:HGNC:17851]	270	441	1136	1145
ENSG00000076053	RBM7	7885	11	114400030	114414203	RNA binding motif protein 7 [Source:HGNC Symbol;Acc:HGNC:9904]	834	1079	926	981
ENSG00000076067	RBMS2	8911	12	56521820	56596193	RNA binding motif single stranded interacting protein 2 [Source:HGNC Symbol;Acc:HGNC:9909]	2192	2214	1529	1436
ENSG00000076108	BAZ2A	10936	12	56595596	56636816	bromodomain adjacent to zinc finger domain 2A [Source:HGNC Symbol;Acc:HGNC:962]	7155	5522	6561	6209
ENSG00000076201	PTPN23	6866	3	47381011	47413435	protein tyrosine phosphatase non-receptor type 23 [Source:HGNC Symbol;Acc:HGNC:14406]	3294	2635	2649	2515
ENSG00000076242	MLH1	8144	3	36993226	37050896	mutL homolog 1 [Source:HGNC Symbol;Acc:HGNC:7127]	825	953	1203	976
ENSG00000076248	UNG	5271	12	109097597	109126725	uracil DNA glycosylase [Source:HGNC Symbol;Acc:HGNC:12572]	502	543	1633	1654
ENSG00000076258	FMO4	2542	1	171314183	171342084	flavin containing dimethylaniline monoxygenase 4 [Source:HGNC Symbol;Acc:HGNC:3772]	94	130	143	57
ENSG00000076321	KLHL20	4244	1	173714941	173786692	kelch like family member 20 [Source:HGNC Symbol;Acc:HGNC:25056]	748	826	698	720
ENSG00000076344	RGS11	4798	16	268301	275980	regulator of G protein signaling 11 [Source:HGNC Symbol;Acc:HGNC:9993]	0	6	0	4
ENSG00000076351	SLC46A1	7954	17	28394642	28407197	solute carrier family 46 member 1 [Source:HGNC Symbol;Acc:HGNC:30521]	135	129	152	114
ENSG00000076356	PLXNA2	13845	1	208022242	208244384	plexin A2 [Source:HGNC Symbol;Acc:HGNC:9100]	3874	3495	2935	2526
ENSG00000076382	SPAG5	5218	17	28577565	28599025	sperm associated antigen 5 [Source:HGNC Symbol;Acc:HGNC:13452]	2267	2057	2963	2782
ENSG00000076513	ANKRD13A	7350	12	109999186	110039763	ankyrin repeat domain 13A [Source:HGNC Symbol;Acc:HGNC:21268]	4051	4002	3321	3234
ENSG00000076554	TPD52	8111	8	80034745	80231232	tumor protein D52 [Source:HGNC Symbol;Acc:HGNC:12005]	2360	2927	2788	3089
ENSG00000076555	ACACB	14513	12	109116587	109268226	acetyl-CoA carboxylase beta [Source:HGNC Symbol;Acc:HGNC:85]	853	623	731	742
ENSG00000076604	TRAF4	4567	17	28744011	28750956	TNF receptor associated factor 4 [Source:HGNC Symbol;Acc:HGNC:12034]	5826	5689	4772	4696
ENSG00000076641	PAG1	11023	8	80967810	81112068	phosphoprotein membrane anchor with glycosphingolipid microdomains 1 [Source:HGNC Symbol;Acc:HGNC:30043]	38	44	71	92
ENSG00000076650	GPATCH1	4469	19	33080899	33130542	G-patch domain containing 1 [Source:HGNC Symbol;Acc:HGNC:24658]	1113	943	1130	1010
ENSG00000076662	ICAM3	2788	19	10333776	10339661	intercellular adhesion molecule 3 [Source:HGNC Symbol;Acc:HGNC:5346]	4	0	2	11
ENSG00000076685	NT5C2	9137	10	103087185	103277605	5'-nucleotidase, cytosolic II [Source:HGNC Symbol;Acc:HGNC:8022]	2402	2351	2531	2266
ENSG00000076706	MCAM	7422	11	119308529	119321521	melanoma cell adhesion molecule [Source:HGNC Symbol;Acc:HGNC:6934]	222	162	242	218
ENSG00000076716	GPC4	4959	X	133300103	133415489	glypican 4 [Source:HGNC Symbol;Acc:HGNC:4452]	1498	1543	1343	1405
ENSG00000076770	MBNL3	13009	X	132369320	132489968	muscleblind like splicing regulator 3 [Source:HGNC Symbol;Acc:HGNC:20564]	1786	1994	2153	1882
ENSG00000076826	CAMSAP3	4884	19	7595863	7618304	calmodulin regulated spectrin associated protein family member 3 [Source:HGNC Symbol;Acc:HGNC:29307]	3140	2610	2936	2879
ENSG00000076864	RAP1GAP	5743	1	21596221	21669357	RAP1 GTPase activating protein [Source:HGNC Symbol;Acc:HGNC:9858]	416	431	469	453
ENSG00000076924	XAB2	4653	19	7619525	7629545	XPA binding protein 2 [Source:HGNC Symbol;Acc:HGNC:14089]	2299	2098	2354	2243
ENSG00000076928	ARHGEF1	8624	19	41883173	41930150	Rho guanine nucleotide exchange factor 1 [Source:HGNC Symbol;Acc:HGNC:681]	3128	3330	3472	3424
ENSG00000076944	STXBP2	6071	19	7636772	7647873	syntaxin binding protein 2 [Source:HGNC Symbol;Acc:HGNC:11445]	322	329	306	330
ENSG00000076984	MAP2K7	5145	19	7903843	7914478	mitogen-activated protein kinase kinase 7 [Source:HGNC Symbol;Acc:HGNC:6847]	1598	1472	1463	1664
ENSG00000077009	NMRK2	1175	19	3933069	3942416	nicotinamide riboside kinase 2 [Source:HGNC Symbol;Acc:HGNC:17871]	0	0	0	0
ENSG00000077044	DGKD	9784	2	233354494	233472104	diacylglycerol kinase delta [Source:HGNC Symbol;Acc:HGNC:2851]	1910	1767	1500	1458
ENSG00000077080	ACTL6B	2376	7	100643097	100656448	actin like 6B [Source:HGNC Symbol;Acc:HGNC:160]	1	0	0	0
ENSG00000077092	RARB	9445	3	24687887	25597932	retinoic acid receptor beta [Source:HGNC Symbol;Acc:HGNC:9865]	243	273	88	138
ENSG00000077097	TOP2B	18645	3	25597978	25664909	DNA topoisomerase II beta [Source:HGNC Symbol;Acc:HGNC:11990]	6041	5878	7233	7129
ENSG00000077147	TM9SF3	7494	10	96518110	96587452	transmembrane 9 superfamily member 3 [Source:HGNC Symbol;Acc:HGNC:21529]	6219	7183	6382	6449
ENSG00000077150	NFKB2	5583	10	102394110	102402524	nuclear factor kappa B subunit 2 [Source:HGNC Symbol;Acc:HGNC:7795]	3921	4069	3649	3386
ENSG00000077152	UBE2T	1930	1	202331544	202341984	ubiquitin conjugating enzyme E2 T [Source:HGNC Symbol;Acc:HGNC:25009]	859	1187	1117	871
ENSG00000077157	PPP1R12B	21118	1	202348699	202592706	protein phosphatase 1 regulatory subunit 12B [Source:HGNC Symbol;Acc:HGNC:7619]	1073	1184	1137	1041
ENSG00000077232	DNAJC10	25053	2	182716255	182794464	DnaJ heat shock protein family (Hsp40) member C10 [Source:HGNC Symbol;Acc:HGNC:24637]	5888	6264	7036	7067
ENSG00000077235	GTF3C1	11562	16	27459555	27549913	general transcription factor IIIC subunit 1 [Source:HGNC Symbol;Acc:HGNC:4664]	5745	4611	5392	5012
ENSG00000077238	IL4R	5884	16	27313668	27364778	interleukin 4 receptor [Source:HGNC Symbol;Acc:HGNC:6015]	1590	1395	1819	1670
ENSG00000077254	USP33	6918	1	77695987	77759852	ubiquitin specific peptidase 33 [Source:HGNC Symbol;Acc:HGNC:20059]	4722	5031	5393	4938
ENSG00000077264	PAK3	10442	X	110944285	111227361	p21 (RAC1) activated kinase 3 [Source:HGNC Symbol;Acc:HGNC:8592]	0	0	0	0
ENSG00000077312	SNRPA	2353	19	40750637	40765389	small nuclear ribonucleoprotein polypeptide A [Source:HGNC Symbol;Acc:HGNC:11151]	2017	2104	2303	1968
ENSG00000077327	SPAG6	3876	10	22345445	22454224	sperm associated antigen 6 [Source:HGNC Symbol;Acc:HGNC:11215]	0	0	0	0
ENSG00000077348	EXOSC5	3712	19	41386371	41397362	exosome component 5 [Source:HGNC Symbol;Acc:HGNC:24662]	1587	1864	1521	1414
ENSG00000077380	DYNC1I2	6433	2	171687409	171750158	dynein cytoplasmic 1 intermediate chain 2 [Source:HGNC Symbol;Acc:HGNC:2964]	3464	3952	3270	3453
ENSG00000077454	LRCH4	7117	7	100574011	100586129	leucine rich repeats and calponin homology domain containing 4 [Source:HGNC Symbol;Acc:HGNC:6691]	833	920	834	743
ENSG00000077458	FAM76B	6031	11	95768953	95790409	family with sequence similarity 76 member B [Source:HGNC Symbol;Acc:HGNC:28492]	333	474	589	597
ENSG00000077463	SIRT6	2749	19	4174109	4182566	sirtuin 6 [Source:HGNC Symbol;Acc:HGNC:14934]	526	602	560	607
ENSG00000077514	POLD3	5501	11	74493851	74669117	DNA polymerase delta 3, accessory subunit [Source:HGNC Symbol;Acc:HGNC:20932]	1272	1445	2125	2280
ENSG00000077522	ACTN2	17931	1	236664141	236764631	actinin alpha 2 [Source:HGNC Symbol;Acc:HGNC:164]	0	2	0	0
ENSG00000077549	CAPZB	19094	1	19338775	19485539	capping actin protein of muscle Z-line subunit beta [Source:HGNC Symbol;Acc:HGNC:1491]	7872	7427	5929	6061
ENSG00000077585	GPR137B	2307	1	236142505	236221865	G protein-coupled receptor 137B [Source:HGNC Symbol;Acc:HGNC:11862]	400	527	555	475
ENSG00000077616	NAALAD2	7168	11	90131515	90192894	N-acetylated alpha-linked acidic dipeptidase 2 [Source:HGNC Symbol;Acc:HGNC:14526]	8	4	6	17
ENSG00000077684	JADE1	9052	4	128809700	128875224	jade family PHD finger 1 [Source:HGNC Symbol;Acc:HGNC:30027]	1094	1009	1413	1442
ENSG00000077713	SLC25A43	2839	X	119399336	119454478	solute carrier family 25 member 43 [Source:HGNC Symbol;Acc:HGNC:30557]	1221	1369	1433	1364
ENSG00000077721	UBE2A	5998	X	119474802	119591083	ubiquitin conjugating enzyme E2 A [Source:HGNC Symbol;Acc:HGNC:12472]	3523	4307	3684	3302
ENSG00000077782	FGFR1	17201	8	38400215	38468834	fibroblast growth factor receptor 1 [Source:HGNC Symbol;Acc:HGNC:3688]	2141	2185	2549	2202
ENSG00000077800	FKBP6	4746	7	73328161	73358637	FKBP prolyl isomerase family member 6 (inactive) [Source:HGNC Symbol;Acc:HGNC:3722]	0	0	0	0
ENSG00000077935	SMC1B	4253	22	45344063	45413619	structural maintenance of chromosomes 1B [Source:HGNC Symbol;Acc:HGNC:11112]	8	16	15	14
ENSG00000077942	FBLN1	7285	22	45502238	45601135	fibulin 1 [Source:HGNC Symbol;Acc:HGNC:3600]	21865	20543	21451	19894
ENSG00000077984	CST7	891	20	24949269	24959928	cystatin F [Source:HGNC Symbol;Acc:HGNC:2479]	0	6	6	0
ENSG00000078018	MAP2	11842	2	209424047	209734147	microtubule associated protein 2 [Source:HGNC Symbol;Acc:HGNC:6839]	562	499	400	333
ENSG00000078043	PIAS2	17535	18	46803218	46920160	protein inhibitor of activated STAT 2 [Source:HGNC Symbol;Acc:HGNC:17311]	497	460	761	743
ENSG00000078053	AMPH	5489	7	38383704	38631420	amphiphysin [Source:HGNC Symbol;Acc:HGNC:471]	0	0	0	0
ENSG00000078061	ARAF	3409	X	47561205	47571908	A-Raf proto-oncogene, serine/threonine kinase [Source:HGNC Symbol;Acc:HGNC:646]	2726	2213	3107	3138
ENSG00000078070	MCCC1	4311	3	183015218	183116075	methylcrotonyl-CoA carboxylase subunit 1 [Source:HGNC Symbol;Acc:HGNC:6936]	713	711	790	875
ENSG00000078081	LAMP3	3785	3	183122215	183163839	lysosomal associated membrane protein 3 [Source:HGNC Symbol;Acc:HGNC:14582]	164	144	194	159
ENSG00000078098	FAP	6968	2	162170684	162245151	fibroblast activation protein alpha [Source:HGNC Symbol;Acc:HGNC:3590]	83	82	77	93
ENSG00000078114	NEBL	17810	10	20779973	21293011	nebulette [Source:HGNC Symbol;Acc:HGNC:16932]	2441	2370	3419	3415
ENSG00000078124	ACER3	23102	11	76860859	77026797	alkaline ceramidase 3 [Source:HGNC Symbol;Acc:HGNC:16066]	4121	4303	3595	3530
ENSG00000078140	UBE2K	5180	4	39698109	39782792	ubiquitin conjugating enzyme E2 K [Source:HGNC Symbol;Acc:HGNC:4914]	3714	3782	4552	4731
ENSG00000078142	PIK3C3	15154	18	41955234	42087830	phosphatidylinositol 3-kinase catalytic subunit type 3 [Source:HGNC Symbol;Acc:HGNC:8974]	998	955	938	804
ENSG00000078177	N4BP2	10053	4	40056797	40158252	NEDD4 binding protein 2 [Source:HGNC Symbol;Acc:HGNC:29851]	497	555	684	732
ENSG00000078237	TIGAR	9444	12	4307763	4360028	TP53 induced glycolysis regulatory phosphatase [Source:HGNC Symbol;Acc:HGNC:1185]	45	38	85	88
ENSG00000078246	TULP3	3179	12	2877223	2941138	TUB like protein 3 [Source:HGNC Symbol;Acc:HGNC:12425]	1053	1064	907	988
ENSG00000078269	SYNJ2	12517	6	157981863	158099176	synaptojanin 2 [Source:HGNC Symbol;Acc:HGNC:11504]	1817	1949	1946	1895
ENSG00000078304	PPP2R5C	14378	14	101761709	101927989	protein phosphatase 2 regulatory subunit B'gamma [Source:HGNC Symbol;Acc:HGNC:9311]	2945	3189	3892	3887
ENSG00000078369	GNB1	9030	1	1785285	1892292	G protein subunit beta 1 [Source:HGNC Symbol;Acc:HGNC:4396]	14851	13801	13631	13386
ENSG00000078399	HOXA9	3033	7	27162438	27175180	homeobox A9 [Source:HGNC Symbol;Acc:HGNC:5109]	0	26	4	4
ENSG00000078401	EDN1	2035	6	12290361	12297194	endothelin 1 [Source:HGNC Symbol;Acc:HGNC:3176]	6055	7048	3691	3330
ENSG00000078403	MLLT10	9130	10	21524646	21743630	MLLT10 histone lysine methyltransferase DOT1L cofactor [Source:HGNC Symbol;Acc:HGNC:16063]	1125	1410	1126	1023
ENSG00000078487	ZCWPW1	3318	7	100400826	100428992	zinc finger CW-type and PWWP domain containing 1 [Source:HGNC Symbol;Acc:HGNC:23486]	90	77	59	93
ENSG00000078618	NRDC	6640	1	51789191	51878805	nardilysin convertase [Source:HGNC Symbol;Acc:HGNC:7995]	10412	10719	11428	11940
ENSG00000078668	VDAC3	3181	8	42391624	42405937	voltage dependent anion channel 3 [Source:HGNC Symbol;Acc:HGNC:12674]	2300	2595	2666	2567
ENSG00000078674	PCM1	14447	8	17922842	18029948	pericentriolar material 1 [Source:HGNC Symbol;Acc:HGNC:8727]	5269	5106	7000	6923
ENSG00000078687	TNRC6C	11634	17	77958703	78108822	trinucleotide repeat containing adaptor 6C [Source:HGNC Symbol;Acc:HGNC:29318]	731	662	664	644
ENSG00000078699	CBFA2T2	9457	20	33490075	33650036	CBFA2/RUNX1 partner transcriptional co-repressor 2 [Source:HGNC Symbol;Acc:HGNC:1536]	2533	2277	2620	2656
ENSG00000078747	ITCH	12406	20	34363235	34511773	itchy E3 ubiquitin protein ligase [Source:HGNC Symbol;Acc:HGNC:13890]	1012	1258	1345	1190
ENSG00000078795	PKD2L2	4653	5	137887968	137942747	polycystin 2 like 2, transient receptor potential cation channel [Source:HGNC Symbol;Acc:HGNC:9012]	2	2	5	6
ENSG00000078804	TP53INP2	4179	20	34704339	34713439	tumor protein p53 inducible nuclear protein 2 [Source:HGNC Symbol;Acc:HGNC:16104]	2292	2195	1872	1869
ENSG00000078808	SDF4	4686	1	1216931	1232031	stromal cell derived factor 4 [Source:HGNC Symbol;Acc:HGNC:24188]	12755	13236	13233	11974
ENSG00000078814	MYH7B	8245	20	34955810	35002437	myosin heavy chain 7B [Source:HGNC Symbol;Acc:HGNC:15906]	48	49	38	44
ENSG00000078898	BPIFB2	1788	20	33007704	33023703	BPI fold containing family B member 2 [Source:HGNC Symbol;Acc:HGNC:16177]	0	0	0	0
ENSG00000078900	TP73	6767	1	3652516	3736201	tumor protein p73 [Source:HGNC Symbol;Acc:HGNC:12003]	816	676	734	813
ENSG00000078902	TOLLIP	5983	11	1274371	1309654	toll interacting protein [Source:HGNC Symbol;Acc:HGNC:16476]	1651	1682	1386	1253
ENSG00000078967	UBE2D4	4715	7	43926436	43956136	ubiquitin conjugating enzyme E2 D4 (putative) [Source:HGNC Symbol;Acc:HGNC:21647]	812	717	823	960
ENSG00000079101	CLUL1	3846	18	596988	650334	clusterin like 1 [Source:HGNC Symbol;Acc:HGNC:2096]	0	7	0	17
ENSG00000079112	CDH17	3878	8	94127162	94217303	cadherin 17 [Source:HGNC Symbol;Acc:HGNC:1756]	0	3	0	3
ENSG00000079134	THOC1	8099	18	214520	268050	THO complex subunit 1 [Source:HGNC Symbol;Acc:HGNC:19070]	1544	1734	2119	2172
ENSG00000079150	FKBP7	6710	2	178463664	178478600	FKBP prolyl isomerase 7 [Source:HGNC Symbol;Acc:HGNC:3723]	56	101	49	59
ENSG00000079156	OSBPL6	11488	2	178194481	178402893	oxysterol binding protein like 6 [Source:HGNC Symbol;Acc:HGNC:16388]	429	402	484	457
ENSG00000079215	SLC1A3	21227	5	36596588	36688334	solute carrier family 1 member 3 [Source:HGNC Symbol;Acc:HGNC:10941]	21132	22775	17657	16888
ENSG00000079246	XRCC5	5463	2	216107464	216206303	X-ray repair cross complementing 5 [Source:HGNC Symbol;Acc:HGNC:12833]	11390	10978	14183	14277
ENSG00000079257	LXN	1459	3	158645822	158672648	latexin [Source:HGNC Symbol;Acc:HGNC:13347]	674	766	920	867
ENSG00000079263	SP140	5582	2	230203110	230313215	SP140 nuclear body protein [Source:HGNC Symbol;Acc:HGNC:17133]	0	0	3	5
ENSG00000079277	MKNK1	8071	1	46557407	46616843	MAPK interacting serine/threonine kinase 1 [Source:HGNC Symbol;Acc:HGNC:7110]	1903	1980	1467	1464
ENSG00000079308	TNS1	16368	2	217799588	218033982	tensin 1 [Source:HGNC Symbol;Acc:HGNC:11973]	1694	1360	1835	1663
ENSG00000079313	REXO1	5579	19	1815248	1848483	RNA exonuclease 1 homolog [Source:HGNC Symbol;Acc:HGNC:24616]	1700	1724	1832	1599
ENSG00000079332	SAR1A	6914	10	70147289	70170523	secretion associated Ras related GTPase 1A [Source:HGNC Symbol;Acc:HGNC:10534]	3285	2989	4975	5074
ENSG00000079335	CDC14A	6510	1	100345001	100520277	cell division cycle 14A [Source:HGNC Symbol;Acc:HGNC:1718]	140	123	260	245
ENSG00000079337	RAPGEF3	12106	12	47734363	47771040	Rap guanine nucleotide exchange factor 3 [Source:HGNC Symbol;Acc:HGNC:16629]	909	722	521	485
ENSG00000079385	CEACAM1	5527	19	42507304	42561234	CEA cell adhesion molecule 1 [Source:HGNC Symbol;Acc:HGNC:1814]	561	526	381	380
ENSG00000079387	SENP1	9420	12	48039784	48106079	SUMO specific peptidase 1 [Source:HGNC Symbol;Acc:HGNC:17927]	1063	1244	1487	1461
ENSG00000079393	DUSP13	2441	10	75094432	75109221	dual specificity phosphatase 13 [Source:HGNC Symbol;Acc:HGNC:19681]	0	0	2	10
ENSG00000079432	CIC	11031	19	42268537	42295797	capicua transcriptional repressor [Source:HGNC Symbol;Acc:HGNC:14214]	5352	4689	8803	8367
ENSG00000079435	LIPE	5161	19	42401514	42427388	lipase E, hormone sensitive type [Source:HGNC Symbol;Acc:HGNC:6621]	100	113	159	136
ENSG00000079459	FDFT1	5080	8	11795573	11839395	farnesyl-diphosphate farnesyltransferase 1 [Source:HGNC Symbol;Acc:HGNC:3629]	8634	9040	8297	7571
ENSG00000079462	PAFAH1B3	1419	19	42297033	42303546	platelet activating factor acetylhydrolase 1b catalytic subunit 3 [Source:HGNC Symbol;Acc:HGNC:8576]	1888	1898	1855	1657
ENSG00000079482	OPHN1	20704	X	67949349	68433913	oligophrenin 1 [Source:HGNC Symbol;Acc:HGNC:8148]	2220	2185	1262	1244
ENSG00000079616	KIF22	7169	16	29790727	29805385	kinesin family member 22 [Source:HGNC Symbol;Acc:HGNC:6391]	2473	2518	2727	2845
ENSG00000079691	CARMIL1	6853	6	25279078	25620530	capping protein regulator and myosin 1 linker 1 [Source:HGNC Symbol;Acc:HGNC:21581]	6190	5152	5712	6329
ENSG00000079739	PGM1	4077	1	63593411	63660245	phosphoglucomutase 1 [Source:HGNC Symbol;Acc:HGNC:8905]	4298	4347	4709	4535
ENSG00000079785	DDX1	10125	2	15591178	15634346	DEAD-box helicase 1 [Source:HGNC Symbol;Acc:HGNC:2734]	8217	8762	9765	9546
ENSG00000079805	DNM2	17565	19	10718055	10833488	dynamin 2 [Source:HGNC Symbol;Acc:HGNC:2974]	18205	15655	17561	17476
ENSG00000079819	EPB41L2	10320	6	130839347	131063322	erythrocyte membrane protein band 4.1 like 2 [Source:HGNC Symbol;Acc:HGNC:3379]	1369	1544	1255	1261
ENSG00000079841	RIMS1	12948	6	71886550	72403150	regulating synaptic membrane exocytosis 1 [Source:HGNC Symbol;Acc:HGNC:17282]	165	139	169	131
ENSG00000079931	MOXD1	5223	6	132296055	132401475	monooxygenase DBH like 1 [Source:HGNC Symbol;Acc:HGNC:21063]	4	9	4	2
ENSG00000079950	STX7	16387	6	132445867	132513198	syntaxin 7 [Source:HGNC Symbol;Acc:HGNC:11442]	2083	2244	1687	1793
ENSG00000079974	RABL2B	6297	22	50767501	50783667	RAB, member of RAS oncogene family like 2B [Source:HGNC Symbol;Acc:HGNC:9800]	902	912	836	774
ENSG00000079999	KEAP1	3573	19	10486125	10503558	kelch like ECH associated protein 1 [Source:HGNC Symbol;Acc:HGNC:23177]	7569	7149	7439	6893
ENSG00000080007	DDX43	2724	6	73394828	73417566	DEAD-box helicase 43 [Source:HGNC Symbol;Acc:HGNC:18677]	0	0	0	0
ENSG00000080031	PTPRH	4345	19	55181247	55209506	protein tyrosine phosphatase receptor type H [Source:HGNC Symbol;Acc:HGNC:9672]	52	65	64	36
ENSG00000080166	DCT	7540	13	94436811	94479682	dopachrome tautomerase [Source:HGNC Symbol;Acc:HGNC:2709]	0	2	0	8
ENSG00000080189	SLC35C2	7708	20	46345980	46364458	solute carrier family 35 member C2 [Source:HGNC Symbol;Acc:HGNC:17117]	2186	2285	2170	2121
ENSG00000080200	CRYBG3	10979	3	97822011	97944984	crystallin beta-gamma domain containing 3 [Source:HGNC Symbol;Acc:HGNC:34427]	1214	1254	1452	1348
ENSG00000080224	EPHA6	18310	3	96814581	97761532	EPH receptor A6 [Source:HGNC Symbol;Acc:HGNC:19296]	16	44	32	11
ENSG00000080293	SCTR	3415	2	119439843	119525301	secretin receptor [Source:HGNC Symbol;Acc:HGNC:10608]	1	5	5	8
ENSG00000080298	RFX3	11169	9	3218297	3526004	regulatory factor X3 [Source:HGNC Symbol;Acc:HGNC:9984]	100	150	159	192
ENSG00000080345	RIF1	18166	2	151409883	151508013	replication timing regulatory factor 1 [Source:HGNC Symbol;Acc:HGNC:23207]	4544	4396	6441	6251
ENSG00000080371	RAB21	16048	12	71754863	71800286	RAB21, member RAS oncogene family [Source:HGNC Symbol;Acc:HGNC:18263]	1325	1455	1709	1838
ENSG00000080493	SLC4A4	9331	4	71062667	71572087	solute carrier family 4 member 4 [Source:HGNC Symbol;Acc:HGNC:11030]	124	73	60	54
ENSG00000080503	SMARCA2	19075	9	1980290	2193624	SWI/SNF related, matrix associated, actin dependent regulator of chromatin, subfamily a, member 2 [Source:HGNC Symbol;Acc:HGNC:11098]	2637	2006	2564	2881
ENSG00000080546	SESN1	7276	6	108984309	109094846	sestrin 1 [Source:HGNC Symbol;Acc:HGNC:21595]	575	563	400	426
ENSG00000080561	MID2	7554	X	107825755	107931637	midline 2 [Source:HGNC Symbol;Acc:HGNC:7096]	1189	1021	1881	1666
ENSG00000080572	DNAAF6	1956	X	107206611	107244247	dynein axonemal assembly factor 6 [Source:HGNC Symbol;Acc:HGNC:28570]	0	0	0	0
ENSG00000080573	COL5A3	6783	19	9959561	10010504	collagen type V alpha 3 chain [Source:HGNC Symbol;Acc:HGNC:14864]	1	0	0	1
ENSG00000080603	SRCAP	13863	16	30698209	30741409	Snf2 related CREBBP activator protein [Source:HGNC Symbol;Acc:HGNC:16974]	344	252	293	324
ENSG00000080608	PUM3	2573	9	2720469	2844095	pumilio RNA binding family member 3 [Source:HGNC Symbol;Acc:HGNC:29676]	1094	1095	1242	1114
ENSG00000080618	CPB2	6699	13	46053186	46105033	carboxypeptidase B2 [Source:HGNC Symbol;Acc:HGNC:2300]	0	4	0	1
ENSG00000080644	CHRNA3	4761	15	78593052	78621295	cholinergic receptor nicotinic alpha 3 subunit [Source:HGNC Symbol;Acc:HGNC:1957]	25	19	52	71
ENSG00000080802	CNOT4	7317	7	135361795	135510145	CCR4-NOT transcription complex subunit 4 [Source:HGNC Symbol;Acc:HGNC:7880]	933	997	1087	1048
ENSG00000080815	PSEN1	25147	14	73136418	73223691	presenilin 1 [Source:HGNC Symbol;Acc:HGNC:9508]	2837	2927	2587	2411
ENSG00000080819	CPOX	3157	3	98579446	98593648	coproporphyrinogen oxidase [Source:HGNC Symbol;Acc:HGNC:2321]	732	973	1381	1281
ENSG00000080822	CLDND1	5210	3	98497912	98523066	claudin domain containing 1 [Source:HGNC Symbol;Acc:HGNC:1322]	1126	1602	1409	1181
ENSG00000080823	MOK	10986	14	102224500	102305190	MOK protein kinase [Source:HGNC Symbol;Acc:HGNC:9833]	170	128	322	309
ENSG00000080824	HSP90AA1	5097	14	102080742	102139699	heat shock protein 90 alpha family class A member 1 [Source:HGNC Symbol;Acc:HGNC:5253]	35361	34490	40107	41422
ENSG00000080839	RBL1	5956	20	36996349	37095997	RB transcriptional corepressor like 1 [Source:HGNC Symbol;Acc:HGNC:9893]	1131	1197	1008	1103
ENSG00000080845	DLGAP4	8785	20	36306336	36528637	DLG associated protein 4 [Source:HGNC Symbol;Acc:HGNC:24476]	3150	2857	3171	2935
ENSG00000080947	CROCCP3	2039	1	16474396	16491307	CROCC pseudogene 3 [Source:HGNC Symbol;Acc:HGNC:29405]	16	12	21	10
ENSG00000080986	NDC80	3554	18	2571557	2616635	NDC80 kinetochore complex component [Source:HGNC Symbol;Acc:HGNC:16909]	1519	2269	3369	3144
ENSG00000081014	AP4E1	7354	15	50908672	51005895	adaptor related protein complex 4 subunit epsilon 1 [Source:HGNC Symbol;Acc:HGNC:573]	1216	1407	1310	1222
ENSG00000081019	RSBN1	6819	1	113761832	113812476	round spermatid basic protein 1 [Source:HGNC Symbol;Acc:HGNC:25642]	921	902	1187	1171
ENSG00000081026	MAGI3	8414	1	113390515	113685923	membrane associated guanylate kinase, WW and PDZ domain containing 3 [Source:HGNC Symbol;Acc:HGNC:29647]	2704	2280	3215	3166
ENSG00000081041	CXCL2	1398	4	74097040	74099196	C-X-C motif chemokine ligand 2 [Source:HGNC Symbol;Acc:HGNC:4603]	162	297	266	202
ENSG00000081052	COL4A4	11820	2	227002714	227164453	collagen type IV alpha 4 chain [Source:HGNC Symbol;Acc:HGNC:2206]	273	271	174	186
ENSG00000081059	TCF7	10093	5	134114681	134151865	transcription factor 7 [Source:HGNC Symbol;Acc:HGNC:11639]	252	209	346	375
ENSG00000081087	OSTM1	13527	6	108029245	108165854	osteoclastogenesis associated transmembrane protein 1 [Source:HGNC Symbol;Acc:HGNC:21652]	1869	2240	2383	2335
ENSG00000081148	IMPG2	8352	3	101222546	101320575	interphotoreceptor matrix proteoglycan 2 [Source:HGNC Symbol;Acc:HGNC:18362]	0	4	0	0
ENSG00000081154	PCNP	3045	3	101574180	101594465	PEST proteolytic signal containing nuclear protein [Source:HGNC Symbol;Acc:HGNC:30023]	2758	3934	6801	6468
ENSG00000081177	EXD2	6276	14	69191498	69244020	exonuclease 3'-5' domain containing 2 [Source:HGNC Symbol;Acc:HGNC:20217]	799	917	859	836
ENSG00000081181	ARG2	2284	14	67619920	67651708	arginase 2 [Source:HGNC Symbol;Acc:HGNC:664]	313	280	339	306
ENSG00000081189	MEF2C	11755	5	88717117	88904257	myocyte enhancer factor 2C [Source:HGNC Symbol;Acc:HGNC:6996]	4	21	3	4
ENSG00000081237	PTPRC	15436	1	198638457	198757476	protein tyrosine phosphatase receptor type C [Source:HGNC Symbol;Acc:HGNC:9666]	14	0	2	0
ENSG00000081248	CACNA1S	7266	1	201039512	201112451	calcium voltage-gated channel subunit alpha1 S [Source:HGNC Symbol;Acc:HGNC:1397]	0	0	2	0
ENSG00000081277	PKP1	6211	1	201283452	201332993	plakophilin 1 [Source:HGNC Symbol;Acc:HGNC:9023]	51	48	38	20
ENSG00000081307	UBA5	8072	3	132654446	132679794	ubiquitin like modifier activating enzyme 5 [Source:HGNC Symbol;Acc:HGNC:23230]	1963	2372	2929	2853
ENSG00000081320	STK17B	6566	2	196133583	196176503	serine/threonine kinase 17b [Source:HGNC Symbol;Acc:HGNC:11396]	1702	1886	1708	1976
ENSG00000081377	CDC14B	10575	9	96490241	96619843	cell division cycle 14B [Source:HGNC Symbol;Acc:HGNC:1719]	955	1011	861	677
ENSG00000081386	ZNF510	7233	9	96754553	96778129	zinc finger protein 510 [Source:HGNC Symbol;Acc:HGNC:29161]	475	450	530	529
ENSG00000081665	ZNF506	9537	19	19785839	19821751	zinc finger protein 506 [Source:HGNC Symbol;Acc:HGNC:23780]	473	639	550	445
ENSG00000081692	JMJD4	4315	1	227730425	227735411	jumonji domain containing 4 [Source:HGNC Symbol;Acc:HGNC:25724]	228	223	239	200
ENSG00000081721	DUSP12	1762	1	161749758	161757238	dual specificity phosphatase 12 [Source:HGNC Symbol;Acc:HGNC:3067]	403	463	877	804
ENSG00000081760	AACS	16039	12	125065434	125143333	acetoacetyl-CoA synthetase [Source:HGNC Symbol;Acc:HGNC:21298]	1528	1794	1877	1930
ENSG00000081791	DELE1	6000	5	141923855	141942047	DAP3 binding cell death enhancer 1 [Source:HGNC Symbol;Acc:HGNC:28969]	2360	2484	2639	2571
ENSG00000081803	CADPS2	6353	7	122318411	122886759	calcium dependent secretion activator 2 [Source:HGNC Symbol;Acc:HGNC:16018]	2439	2417	3042	3268
ENSG00000081818	PCDHB4	3806	5	141121818	141125623	protocadherin beta 4 [Source:HGNC Symbol;Acc:HGNC:8689]	8	20	13	14
ENSG00000081842	PCDHA6	6136	5	140827958	141012347	protocadherin alpha 6 [Source:HGNC Symbol;Acc:HGNC:8672]	4	0	0	0
ENSG00000081853	PCDHGA2	6720	5	141338760	141512975	protocadherin gamma subfamily A, 2 [Source:HGNC Symbol;Acc:HGNC:8700]	4	6	6	4
ENSG00000081870	IFT25	3006	1	53916574	53945699	intraflagellar transport 25 [Source:HGNC Symbol;Acc:HGNC:25019]	660	918	817	795
ENSG00000081913	PHLPP1	9051	18	62715541	62980433	PH domain and leucine rich repeat protein phosphatase 1 [Source:HGNC Symbol;Acc:HGNC:20610]	666	719	553	493
ENSG00000081923	ATP8B1	7028	18	57646426	57803315	ATPase phospholipid transporting 8B1 [Source:HGNC Symbol;Acc:HGNC:3706]	2267	2041	1959	1999
ENSG00000081985	IL12RB2	7496	1	67307364	67398724	interleukin 12 receptor subunit beta 2 [Source:HGNC Symbol;Acc:HGNC:5972]	2	0	11	0
ENSG00000082014	SMARCD3	4919	7	151238764	151277896	SWI/SNF related, matrix associated, actin dependent regulator of chromatin, subfamily d, member 3 [Source:HGNC Symbol;Acc:HGNC:11108]	156	119	429	334
ENSG00000082068	WDR70	6966	5	37379285	37753435	WD repeat domain 70 [Source:HGNC Symbol;Acc:HGNC:25495]	801	1002	1062	1002
ENSG00000082074	FYB1	8823	5	39105252	39274528	FYN binding protein 1 [Source:HGNC Symbol;Acc:HGNC:4036]	2	0	0	0
ENSG00000082126	MPP4	4924	2	201644870	201698694	MAGUK p55 scaffold protein 4 [Source:HGNC Symbol;Acc:HGNC:13680]	0	0	0	0
ENSG00000082146	STRADB	3177	2	201387858	201480846	STE20 related adaptor beta [Source:HGNC Symbol;Acc:HGNC:13205]	1016	1270	852	781
ENSG00000082153	BZW1	8085	2	200810594	200827338	basic leucine zipper and W2 domains 1 [Source:HGNC Symbol;Acc:HGNC:18380]	7811	9058	10008	9364
ENSG00000082196	C1QTNF3	4547	5	34017858	34043213	C1q and TNF related 3 [Source:HGNC Symbol;Acc:HGNC:14326]	11	18	36	29
ENSG00000082212	ME2	15897	18	50879080	50954257	malic enzyme 2 [Source:HGNC Symbol;Acc:HGNC:6984]	2695	2876	2870	2589
ENSG00000082213	C5orf22	4146	5	31532287	31555053	chromosome 5 open reading frame 22 [Source:HGNC Symbol;Acc:HGNC:25639]	1020	1066	1848	1620
ENSG00000082258	CCNT2	9081	2	134918235	134959342	cyclin T2 [Source:HGNC Symbol;Acc:HGNC:1600]	1919	2094	2182	2216
ENSG00000082269	FAM135A	10476	6	70412941	70561174	family with sequence similarity 135 member A [Source:HGNC Symbol;Acc:HGNC:21084]	1252	1211	1486	1565
ENSG00000082397	EPB41L3	12203	18	5392381	5630700	erythrocyte membrane protein band 4.1 like 3 [Source:HGNC Symbol;Acc:HGNC:3380]	0	0	0	0
ENSG00000082438	COBLL1	17176	2	164653624	164843679	cordon-bleu WH2 repeat protein like 1 [Source:HGNC Symbol;Acc:HGNC:23571]	943	969	1068	1042
ENSG00000082458	DLG3	7883	X	70444835	70505490	discs large MAGUK scaffold protein 3 [Source:HGNC Symbol;Acc:HGNC:2902]	2483	2535	2040	2125
ENSG00000082482	KCNK2	4294	1	215005775	215237090	potassium two pore domain channel subfamily K member 2 [Source:HGNC Symbol;Acc:HGNC:6277]	617	643	951	961
ENSG00000082497	SERTAD4	5470	1	210232796	210246631	SERTA domain containing 4 [Source:HGNC Symbol;Acc:HGNC:25236]	1748	1767	1321	1407
ENSG00000082512	TRAF5	9022	1	211326615	211374946	TNF receptor associated factor 5 [Source:HGNC Symbol;Acc:HGNC:12035]	542	644	552	647
ENSG00000082515	MRPL22	5264	5	154941073	154969411	mitochondrial ribosomal protein L22 [Source:HGNC Symbol;Acc:HGNC:14480]	1138	1450	1204	1038
ENSG00000082516	GEMIN5	5644	5	154887411	154938211	gem nuclear organelle associated protein 5 [Source:HGNC Symbol;Acc:HGNC:20043]	2510	2269	2611	2343
ENSG00000082556	OPRK1	5670	8	53225724	53251637	opioid receptor kappa 1 [Source:HGNC Symbol;Acc:HGNC:8154]	10	10	26	20
ENSG00000082641	NFE2L1	5883	17	48048329	48061545	NFE2 like bZIP transcription factor 1 [Source:HGNC Symbol;Acc:HGNC:7781]	7488	5819	4240	4491
ENSG00000082684	SEMA5B	8517	3	122909082	123028605	semaphorin 5B [Source:HGNC Symbol;Acc:HGNC:10737]	2	3	18	8
ENSG00000082701	GSK3B	17871	3	119821321	120094994	glycogen synthase kinase 3 beta [Source:HGNC Symbol;Acc:HGNC:4617]	7169	7054	5137	4497
ENSG00000082781	ITGB5	6515	3	124761948	124901418	integrin subunit beta 5 [Source:HGNC Symbol;Acc:HGNC:6160]	7999	7614	6385	6211
ENSG00000082805	ERC1	15826	12	990509	1495933	ELKS/RAB6-interacting/CAST family member 1 [Source:HGNC Symbol;Acc:HGNC:17072]	2547	2074	2614	2356
ENSG00000082898	XPO1	23843	2	61476032	61538741	exportin 1 [Source:HGNC Symbol;Acc:HGNC:12825]	6848	8048	10788	10362
ENSG00000082996	RNF13	3573	3	149812770	149962139	ring finger protein 13 [Source:HGNC Symbol;Acc:HGNC:10057]	1312	1564	1355	1470
ENSG00000083067	TRPM3	22241	9	70529060	71446904	transient receptor potential cation channel subfamily M member 3 [Source:HGNC Symbol;Acc:HGNC:17992]	2	4	0	0
ENSG00000083093	PALB2	7433	16	23603160	23641321	partner and localizer of BRCA2 [Source:HGNC Symbol;Acc:HGNC:26144]	916	788	934	975
ENSG00000083097	DOP1A	10045	6	83067666	83171350	DOP1 leucine zipper like protein A [Source:HGNC Symbol;Acc:HGNC:21194]	426	491	1035	1027
ENSG00000083099	LYRM2	8675	6	89568144	89638749	LYR motif containing 2 [Source:HGNC Symbol;Acc:HGNC:25229]	1738	1933	2508	2467
ENSG00000083123	BCKDHB	4071	6	80106647	80346270	branched chain keto acid dehydrogenase E1 subunit beta [Source:HGNC Symbol;Acc:HGNC:987]	1139	1413	1502	1437
ENSG00000083168	KAT6A	24143	8	41929479	42051994	lysine acetyltransferase 6A [Source:HGNC Symbol;Acc:HGNC:13013]	2298	1812	2139	2126
ENSG00000083223	TUT7	6707	9	86287733	86354454	terminal uridylyl transferase 7 [Source:HGNC Symbol;Acc:HGNC:25817]	889	1020	1189	1251
ENSG00000083290	ULK2	9868	17	19770829	19867936	unc-51 like autophagy activating kinase 2 [Source:HGNC Symbol;Acc:HGNC:13480]	1682	1456	1581	1752
ENSG00000083307	GRHL2	6053	8	101492439	101669726	grainyhead like transcription factor 2 [Source:HGNC Symbol;Acc:HGNC:2799]	3621	3418	3235	3053
ENSG00000083312	TNPO1	13099	5	72816312	72916733	transportin 1 [Source:HGNC Symbol;Acc:HGNC:6401]	8509	8814	9073	8191
ENSG00000083444	PLOD1	5320	1	11934205	11975538	procollagen-lysine,2-oxoglutarate 5-dioxygenase 1 [Source:HGNC Symbol;Acc:HGNC:9081]	3016	2560	2564	2637
ENSG00000083454	P2RX5	4031	17	3672199	3696240	purinergic receptor P2X 5 [Source:HGNC Symbol;Acc:HGNC:8536]	59	83	116	89
ENSG00000083457	ITGAE	6602	17	3714628	3801188	integrin subunit alpha E [Source:HGNC Symbol;Acc:HGNC:6147]	314	442	395	322
ENSG00000083520	DIS3	10835	13	72752169	72782096	DIS3 homolog, exosome endoribonuclease and 3'-5' exoribonuclease [Source:HGNC Symbol;Acc:HGNC:20604]	1949	2104	1920	2076
ENSG00000083535	PIBF1	4179	13	72782133	73016461	progesterone immunomodulatory binding factor 1 [Source:HGNC Symbol;Acc:HGNC:23352]	306	357	397	389
ENSG00000083544	TDRD3	7823	13	60396457	60573878	tudor domain containing 3 [Source:HGNC Symbol;Acc:HGNC:20612]	356	436	698	750
ENSG00000083635	NUFIP1	3480	13	44939249	44989471	nuclear FMR1 interacting protein 1 [Source:HGNC Symbol;Acc:HGNC:8057]	420	426	431	514
ENSG00000083642	PDS5B	13187	13	32586452	32778019	PDS5 cohesin associated factor B [Source:HGNC Symbol;Acc:HGNC:20418]	2469	2657	3019	3078
ENSG00000083720	OXCT1	4100	5	41730065	41870425	3-oxoacid CoA-transferase 1 [Source:HGNC Symbol;Acc:HGNC:8527]	3305	3770	3399	3387
ENSG00000083750	RRAGB	2715	X	55717749	55758774	Ras related GTP binding B [Source:HGNC Symbol;Acc:HGNC:19901]	486	589	475	478
ENSG00000083799	CYLD	12952	16	50742050	50801935	CYLD lysine 63 deubiquitinase [Source:HGNC Symbol;Acc:HGNC:2584]	2197	2115	3323	3437
ENSG00000083807	SLC27A5	8025	19	58479512	58512413	solute carrier family 27 member 5 [Source:HGNC Symbol;Acc:HGNC:10999]	202	231	259	196
ENSG00000083812	ZNF324	5653	19	58467056	58475436	zinc finger protein 324 [Source:HGNC Symbol;Acc:HGNC:14096]	790	615	972	959
ENSG00000083814	ZNF671	3532	19	57719751	57727624	zinc finger protein 671 [Source:HGNC Symbol;Acc:HGNC:26279]	3	15	27	11
ENSG00000083817	ZNF416	2545	19	57571566	57578911	zinc finger protein 416 [Source:HGNC Symbol;Acc:HGNC:20645]	304	267	289	273
ENSG00000083828	ZNF586	5480	19	57769655	57819939	zinc finger protein 586 [Source:HGNC Symbol;Acc:HGNC:25949]	406	413	551	570
ENSG00000083838	ZNF446	4768	19	58474017	58481230	zinc finger protein 446 [Source:HGNC Symbol;Acc:HGNC:21036]	148	147	213	176
ENSG00000083844	ZNF264	12532	19	57191500	57222846	zinc finger protein 264 [Source:HGNC Symbol;Acc:HGNC:13057]	2034	1891	2500	2660
ENSG00000083845	RPS5	3617	19	58386400	58394806	ribosomal protein S5 [Source:HGNC Symbol;Acc:HGNC:10426]	17498	16322	19387	18729
ENSG00000083857	FAT1	16158	4	186587794	186726722	FAT atypical cadherin 1 [Source:HGNC Symbol;Acc:HGNC:3595]	23377	20319	21057	16656
ENSG00000083896	YTHDC1	7033	4	68310387	68350090	YTH domain containing 1 [Source:HGNC Symbol;Acc:HGNC:30626]	2097	2381	2817	2543
ENSG00000083937	CHMP2B	8243	3	87227271	87255556	charged multivesicular body protein 2B [Source:HGNC Symbol;Acc:HGNC:24537]	1462	1699	1373	1247
ENSG00000084070	SMAP2	3601	1	40344850	40423326	small ArfGAP2 [Source:HGNC Symbol;Acc:HGNC:25082]	2117	2080	2210	2154
ENSG00000084072	PPIE	11124	1	39692182	39763914	peptidylprolyl isomerase E [Source:HGNC Symbol;Acc:HGNC:9258]	4350	4351	4446	4393
ENSG00000084073	ZMPSTE24	4022	1	40258041	40294180	zinc metallopeptidase STE24 [Source:HGNC Symbol;Acc:HGNC:12877]	8706	9879	10697	10835
ENSG00000084090	STARD7	4416	2	96184859	96208827	StAR related lipid transfer domain containing 7 [Source:HGNC Symbol;Acc:HGNC:18063]	5253	5709	7677	7275
ENSG00000084092	NOA1	2218	4	56963350	56977606	nitric oxide associated 1 [Source:HGNC Symbol;Acc:HGNC:28473]	1194	1205	1266	1168
ENSG00000084093	REST	9408	4	56907876	56966808	RE1 silencing transcription factor [Source:HGNC Symbol;Acc:HGNC:9966]	1738	1750	2109	1980
ENSG00000084110	HAL	5146	12	95972662	95996365	histidine ammonia-lyase [Source:HGNC Symbol;Acc:HGNC:4806]	10	6	10	20
ENSG00000084112	SSH1	14538	12	108778191	108857590	slingshot protein phosphatase 1 [Source:HGNC Symbol;Acc:HGNC:30579]	2607	2482	2076	1977
ENSG00000084207	GSTP1	1764	11	67583742	67586656	glutathione S-transferase pi 1 [Source:HGNC Symbol;Acc:HGNC:4638]	198	218	283	227
ENSG00000084234	APLP2	7463	11	130068147	130144811	amyloid beta precursor like protein 2 [Source:HGNC Symbol;Acc:HGNC:598]	27620	28422	32182	30741
ENSG00000084444	FAM234B	6710	12	13044381	13142521	family with sequence similarity 234 member B [Source:HGNC Symbol;Acc:HGNC:29288]	373	284	385	393
ENSG00000084463	WBP11	5258	12	14784582	14803486	WW domain binding protein 11 [Source:HGNC Symbol;Acc:HGNC:16461]	3091	2944	2383	2533
ENSG00000084623	EIF3I	9526	1	32221077	32245397	eukaryotic translation initiation factor 3 subunit I [Source:HGNC Symbol;Acc:HGNC:3272]	10412	9384	10397	9482
ENSG00000084628	NKAIN1	3320	1	31179745	31239887	sodium/potassium transporting ATPase interacting 1 [Source:HGNC Symbol;Acc:HGNC:25743]	8	6	6	4
ENSG00000084636	COL16A1	9253	1	31652263	31704319	collagen type XVI alpha 1 chain [Source:HGNC Symbol;Acc:HGNC:2193]	846	821	514	502
ENSG00000084652	TXLNA	5114	1	32179675	32198285	taxilin alpha [Source:HGNC Symbol;Acc:HGNC:30685]	4775	4422	7003	7139
ENSG00000084674	APOB	14828	2	21001429	21044073	apolipoprotein B [Source:HGNC Symbol;Acc:HGNC:603]	0	0	0	0
ENSG00000084676	NCOA1	8982	2	24491254	24770702	nuclear receptor coactivator 1 [Source:HGNC Symbol;Acc:HGNC:7668]	5300	4390	4668	5145
ENSG00000084693	AGBL5	5283	2	27042364	27070622	AGBL carboxypeptidase 5 [Source:HGNC Symbol;Acc:HGNC:26147]	3100	2712	3020	3074
ENSG00000084710	EFR3B	10643	2	25042076	25159135	EFR3 homolog B [Source:HGNC Symbol;Acc:HGNC:29155]	107	56	124	141
ENSG00000084731	KIF3C	6401	2	25926598	25982749	kinesin family member 3C [Source:HGNC Symbol;Acc:HGNC:6321]	2720	2223	2214	1802
ENSG00000084733	RAB10	3654	2	26034084	26137454	RAB10, member RAS oncogene family [Source:HGNC Symbol;Acc:HGNC:9759]	7473	8374	11618	11378
ENSG00000084754	HADHA	4331	2	26190635	26244672	hydroxyacyl-CoA dehydrogenase trifunctional multienzyme complex subunit alpha [Source:HGNC Symbol;Acc:HGNC:4801]	8800	8086	8990	9005
ENSG00000084764	MAPRE3	3628	2	26970637	27027219	microtubule associated protein RP/EB family member 3 [Source:HGNC Symbol;Acc:HGNC:6892]	480	416	484	499
ENSG00000084774	CAD	8443	2	27217369	27243943	carbamoyl-phosphate synthetase 2, aspartate transcarbamylase, and dihydroorotase [Source:HGNC Symbol;Acc:HGNC:1424]	8597	7708	7140	6905
ENSG00000085063	CD59	10557	11	33703010	33736479	CD59 molecule (CD59 blood group) [Source:HGNC Symbol;Acc:HGNC:1689]	19788	20078	21500	21887
ENSG00000085117	CD82	4039	11	44564427	44620358	CD82 molecule [Source:HGNC Symbol;Acc:HGNC:6210]	11917	10490	10977	10992
ENSG00000085185	BCORL1	7984	X	129981107	130058071	BCL6 corepressor like 1 [Source:HGNC Symbol;Acc:HGNC:25657]	1525	1099	1393	1258
ENSG00000085224	ATRX	22740	X	77504880	77786233	ATRX chromatin remodeler [Source:HGNC Symbol;Acc:HGNC:886]	4282	4064	5165	5235
ENSG00000085231	AK6	2140	5	69350984	69370013	adenylate kinase 6 [Source:HGNC Symbol;Acc:HGNC:49151]	365	531	533	409
ENSG00000085274	MYNN	5165	3	169773396	169789716	myoneurin [Source:HGNC Symbol;Acc:HGNC:14955]	336	492	557	545
ENSG00000085365	SCAMP1	6746	5	78360611	78480739	secretory carrier membrane protein 1 [Source:HGNC Symbol;Acc:HGNC:10563]	1856	1894	2645	2754
ENSG00000085377	PREP	8917	6	105273218	105454062	prolyl endopeptidase [Source:HGNC Symbol;Acc:HGNC:9358]	7106	7102	3947	3850
ENSG00000085382	HACE1	9237	6	104728094	104859919	HECT domain and ankyrin repeat containing E3 ubiquitin protein ligase 1 [Source:HGNC Symbol;Acc:HGNC:21033]	1334	1376	1546	1452
ENSG00000085415	SEH1L	10481	18	12947133	12987536	SEH1 like nucleoporin [Source:HGNC Symbol;Acc:HGNC:30379]	4426	5061	6368	6141
ENSG00000085433	WDR47	4417	1	108970214	109042113	WD repeat domain 47 [Source:HGNC Symbol;Acc:HGNC:29141]	964	905	863	723
ENSG00000085449	WDFY1	5485	2	223855716	223945357	WD repeat and FYVE domain containing 1 [Source:HGNC Symbol;Acc:HGNC:20451]	975	1023	1394	1157
ENSG00000085465	OVGP1	2520	1	111414319	111427735	oviductal glycoprotein 1 [Source:HGNC Symbol;Acc:HGNC:8524]	204	165	164	185
ENSG00000085491	SLC25A24	6726	1	108134043	108200849	solute carrier family 25 member 24 [Source:HGNC Symbol;Acc:HGNC:20662]	3429	3986	3942	3850
ENSG00000085511	MAP3K4	7522	6	160991727	161117385	mitogen-activated protein kinase kinase kinase 4 [Source:HGNC Symbol;Acc:HGNC:6856]	1124	1123	1263	1311
ENSG00000085514	PILRA	1990	7	100367530	100400096	paired immunoglobin like type 2 receptor alpha [Source:HGNC Symbol;Acc:HGNC:20396]	49	47	68	81
ENSG00000085552	IGSF9	6637	1	159927039	159945613	immunoglobulin superfamily member 9 [Source:HGNC Symbol;Acc:HGNC:18132]	2707	2652	2390	2362
ENSG00000085563	ABCB1	6422	7	87503017	87713323	ATP binding cassette subfamily B member 1 [Source:HGNC Symbol;Acc:HGNC:40]	111	61	35	56
ENSG00000085644	ZNF213	6442	16	3129777	3142804	zinc finger protein 213 [Source:HGNC Symbol;Acc:HGNC:13005]	824	742	859	942
ENSG00000085662	AKR1B1	3654	7	134442356	134459284	aldo-keto reductase family 1 member B [Source:HGNC Symbol;Acc:HGNC:381]	22433	19679	26599	23235
ENSG00000085719	CPNE3	6737	8	86514435	86561498	copine 3 [Source:HGNC Symbol;Acc:HGNC:2316]	3170	3221	3333	3374
ENSG00000085721	RRN3	4139	16	15060033	15094311	RRN3 homolog, RNA polymerase I transcription factor [Source:HGNC Symbol;Acc:HGNC:30346]	2328	2448	2735	2735
ENSG00000085733	CTTN	6949	11	70398404	70436584	cortactin [Source:HGNC Symbol;Acc:HGNC:3338]	22472	19638	14723	16678
ENSG00000085741	WNT11	2371	11	76186325	76210736	Wnt family member 11 [Source:HGNC Symbol;Acc:HGNC:12776]	2	0	4	1
ENSG00000085760	MTIF2	3374	2	55236595	55269347	mitochondrial translational initiation factor 2 [Source:HGNC Symbol;Acc:HGNC:7441]	2130	2203	2591	2610
ENSG00000085788	DDHD2	10548	8	38225218	38275558	DDHD domain containing 2 [Source:HGNC Symbol;Acc:HGNC:29106]	2832	3380	2888	2773
ENSG00000085831	TTC39A	9491	1	51287258	51345116	tetratricopeptide repeat domain 39A [Source:HGNC Symbol;Acc:HGNC:18657]	2766	2320	2357	2351
ENSG00000085832	EPS15	8329	1	51354263	51519328	epidermal growth factor receptor pathway substrate 15 [Source:HGNC Symbol;Acc:HGNC:3419]	3451	4039	3477	3227
ENSG00000085840	ORC1	3121	1	52372829	52404423	origin recognition complex subunit 1 [Source:HGNC Symbol;Acc:HGNC:8487]	905	1001	1183	1220
ENSG00000085871	MGST2	3172	4	139665768	139740745	microsomal glutathione S-transferase 2 [Source:HGNC Symbol;Acc:HGNC:7063]	289	479	401	332
ENSG00000085872	CHERP	6015	19	16517894	16542437	calcium homeostasis endoplasmic reticulum protein [Source:HGNC Symbol;Acc:HGNC:16930]	3973	3501	3470	3462
ENSG00000085978	ATG16L1	6047	2	233210051	233295674	autophagy related 16 like 1 [Source:HGNC Symbol;Acc:HGNC:21498]	1314	1382	1311	1306
ENSG00000085982	USP40	9349	2	233475526	233566782	ubiquitin specific peptidase 40 [Source:HGNC Symbol;Acc:HGNC:20069]	892	893	925	1014
ENSG00000085998	POMGNT1	9028	1	46188683	46220305	protein O-linked mannose N-acetylglucosaminyltransferase 1 (beta 1,2-) [Source:HGNC Symbol;Acc:HGNC:19139]	5283	5283	4130	3901
ENSG00000085999	RAD54L	4078	1	46246461	46278480	RAD54 like [Source:HGNC Symbol;Acc:HGNC:9826]	972	950	953	1020
ENSG00000086015	MAST2	8062	1	45786987	46036122	microtubule associated serine/threonine kinase 2 [Source:HGNC Symbol;Acc:HGNC:19035]	12386	10346	10358	10382
ENSG00000086061	DNAJA1	2668	9	33025273	33039907	DnaJ heat shock protein family (Hsp40) member A1 [Source:HGNC Symbol;Acc:HGNC:5229]	4276	4779	5895	5583
ENSG00000086062	B4GALT1	4896	9	33104082	33167356	beta-1,4-galactosyltransferase 1 [Source:HGNC Symbol;Acc:HGNC:924]	8083	6870	4291	4328
ENSG00000086065	CHMP5	2391	9	33264879	33282070	charged multivesicular body protein 5 [Source:HGNC Symbol;Acc:HGNC:26942]	655	778	820	701
ENSG00000086102	NFX1	7146	9	33290512	33371157	nuclear transcription factor, X-box binding 1 [Source:HGNC Symbol;Acc:HGNC:7803]	1368	1412	1600	1617
ENSG00000086159	AQP6	5129	12	49967194	49977139	aquaporin 6 [Source:HGNC Symbol;Acc:HGNC:639]	0	6	0	6
ENSG00000086189	DIMT1	10981	5	62347284	62403943	DIM1 rRNA methyltransferase and ribosome maturation factor [Source:HGNC Symbol;Acc:HGNC:30217]	397	590	569	625
ENSG00000086200	IPO11	7540	5	62403972	62628582	importin 11 [Source:HGNC Symbol;Acc:HGNC:20628]	1240	1330	1243	1103
ENSG00000086232	EIF2AK1	5492	7	6022247	6059175	eukaryotic translation initiation factor 2 alpha kinase 1 [Source:HGNC Symbol;Acc:HGNC:24921]	15249	13551	13404	13914
ENSG00000086289	EPDR1	2647	7	37920640	37951936	ependymin related 1 [Source:HGNC Symbol;Acc:HGNC:17572]	0	0	0	0
ENSG00000086300	SNX10	9556	7	26291862	26374383	sorting nexin 10 [Source:HGNC Symbol;Acc:HGNC:14974]	936	1319	726	682
ENSG00000086475	SEPHS1	3884	10	13317428	13348298	selenophosphate synthetase 1 [Source:HGNC Symbol;Acc:HGNC:19685]	2774	2922	3609	3441
ENSG00000086504	MRPL28	3053	16	366969	371289	mitochondrial ribosomal protein L28 [Source:HGNC Symbol;Acc:HGNC:14484]	1548	1480	1938	1511
ENSG00000086506	HBQ1	528	16	180459	181179	hemoglobin subunit theta 1 [Source:HGNC Symbol;Acc:HGNC:4833]	0	2	0	0
ENSG00000086544	ITPKC	3376	19	40717112	40740860	inositol-trisphosphate 3-kinase C [Source:HGNC Symbol;Acc:HGNC:14897]	1821	1576	1587	1574
ENSG00000086548	CEACAM6	2956	19	41750977	41772211	CEA cell adhesion molecule 6 [Source:HGNC Symbol;Acc:HGNC:1818]	436	356	309	278
ENSG00000086570	FAT2	14712	5	151504092	151591331	FAT atypical cadherin 2 [Source:HGNC Symbol;Acc:HGNC:3596]	73	86	86	78
ENSG00000086589	RBM22	3587	5	150690792	150701077	RNA binding motif protein 22 [Source:HGNC Symbol;Acc:HGNC:25503]	2184	2252	2602	2719
ENSG00000086598	TMED2	3833	12	123584533	123598582	transmembrane p24 trafficking protein 2 [Source:HGNC Symbol;Acc:HGNC:16996]	4270	5039	5705	5165
ENSG00000086619	ERO1B	15361	1	236214681	236282019	endoplasmic reticulum oxidoreductase 1 beta [Source:HGNC Symbol;Acc:HGNC:14355]	264	256	436	409
ENSG00000086666	ZFAND6	5153	15	80059568	80138393	zinc finger AN1-type containing 6 [Source:HGNC Symbol;Acc:HGNC:30164]	1413	1787	1698	1485
ENSG00000086696	HSD17B2	9529	16	82035004	82098534	hydroxysteroid 17-beta dehydrogenase 2 [Source:HGNC Symbol;Acc:HGNC:5211]	219	254	334	269
ENSG00000086712	TXLNG	4455	X	16786432	16844519	taxilin gamma [Source:HGNC Symbol;Acc:HGNC:18578]	1518	1675	1869	1877
ENSG00000086717	PPEF1	4372	X	18675909	18827921	protein phosphatase with EF-hand domain 1 [Source:HGNC Symbol;Acc:HGNC:9243]	10	8	6	12
ENSG00000086730	LAT2	4545	7	74199652	74229834	linker for activation of T cells family member 2 [Source:HGNC Symbol;Acc:HGNC:12749]	49	51	107	113
ENSG00000086758	HUWE1	17780	X	53532096	53686752	HECT, UBA and WWE domain containing E3 ubiquitin protein ligase 1 [Source:HGNC Symbol;Acc:HGNC:30892]	49408	36542	45776	36447
ENSG00000086827	ZW10	2916	11	113733187	113773735	zw10 kinetochore protein [Source:HGNC Symbol;Acc:HGNC:13194]	1783	2094	988	1037
ENSG00000086848	ALG9	8070	11	111782195	111871581	ALG9 alpha-1,2-mannosyltransferase [Source:HGNC Symbol;Acc:HGNC:15672]	316	460	445	390
ENSG00000086967	MYBPC2	3719	19	50432892	50466321	myosin binding protein C2 [Source:HGNC Symbol;Acc:HGNC:7550]	0	5	6	0
ENSG00000086991	NOX4	6099	11	89324353	89498187	NADPH oxidase 4 [Source:HGNC Symbol;Acc:HGNC:7891]	0	0	0	0
ENSG00000087008	ACOX3	3846	4	8366282	8440723	acyl-CoA oxidase 3, pristanoyl [Source:HGNC Symbol;Acc:HGNC:121]	1111	1032	609	584
ENSG00000087053	MTMR2	13952	11	95821766	95925315	myotubularin related protein 2 [Source:HGNC Symbol;Acc:HGNC:7450]	2217	2389	4477	4218
ENSG00000087074	PPP1R15A	3433	19	48872212	48876059	protein phosphatase 1 regulatory subunit 15A [Source:HGNC Symbol;Acc:HGNC:14375]	1533	1743	1298	1200
ENSG00000087076	HSD17B14	1112	19	48813018	48836510	hydroxysteroid 17-beta dehydrogenase 14 [Source:HGNC Symbol;Acc:HGNC:23238]	9	2	2	8
ENSG00000087077	TRIP6	2553	7	100867387	100873454	thyroid hormone receptor interactor 6 [Source:HGNC Symbol;Acc:HGNC:12311]	4135	4160	3785	3336
ENSG00000087085	ACHE	4074	7	100889994	100896974	acetylcholinesterase (Cartwright blood group) [Source:HGNC Symbol;Acc:HGNC:108]	8	2	0	0
ENSG00000087086	FTL	871	19	48965309	48966879	ferritin light chain [Source:HGNC Symbol;Acc:HGNC:3999]	3865	3598	4832	4375
ENSG00000087087	SRRT	4858	7	100875103	100888664	serrate, RNA effector molecule [Source:HGNC Symbol;Acc:HGNC:24101]	6089	5942	8571	8742
ENSG00000087088	BAX	2587	19	48954815	48961798	BCL2 associated X, apoptosis regulator [Source:HGNC Symbol;Acc:HGNC:959]	1207	1566	1383	1303
ENSG00000087095	NLK	4769	17	28041737	28196381	nemo like kinase [Source:HGNC Symbol;Acc:HGNC:29858]	499	526	403	384
ENSG00000087111	PIGS	8049	17	28553383	28571794	phosphatidylinositol glycan anchor biosynthesis class S [Source:HGNC Symbol;Acc:HGNC:14937]	3116	2712	2604	2591
ENSG00000087116	ADAMTS2	8965	5	179110853	179345461	ADAM metallopeptidase with thrombospondin type 1 motif 2 [Source:HGNC Symbol;Acc:HGNC:218]	4	6	2	7
ENSG00000087128	TMPRSS11E	2124	4	68447463	68497604	transmembrane serine protease 11E [Source:HGNC Symbol;Acc:HGNC:24465]	192	296	144	117
ENSG00000087152	ATXN7L3	5333	17	44191805	44200113	ataxin 7 like 3 [Source:HGNC Symbol;Acc:HGNC:25416]	2285	2369	3390	3173
ENSG00000087157	PGS1	5058	17	78378649	78425114	phosphatidylglycerophosphate synthase 1 [Source:HGNC Symbol;Acc:HGNC:30029]	1879	1843	1690	1697
ENSG00000087191	PSMC5	4279	17	63827152	63832026	proteasome 26S subunit, ATPase 5 [Source:HGNC Symbol;Acc:HGNC:9552]	2549	2306	2929	2916
ENSG00000087206	UIMC1	4767	5	176905005	177022633	ubiquitin interaction motif containing 1 [Source:HGNC Symbol;Acc:HGNC:30298]	1727	1684	1604	1380
ENSG00000087237	CETP	3391	16	56961923	56983845	cholesteryl ester transfer protein [Source:HGNC Symbol;Acc:HGNC:1869]	28	3	0	28
ENSG00000087245	MMP2	4706	16	55389700	55506691	matrix metallopeptidase 2 [Source:HGNC Symbol;Acc:HGNC:7166]	119	83	112	138
ENSG00000087253	LPCAT2	7361	16	55509072	55586666	lysophosphatidylcholine acyltransferase 2 [Source:HGNC Symbol;Acc:HGNC:26032]	4829	5405	4786	4436
ENSG00000087258	GNAO1	14555	16	56191390	56357444	G protein subunit alpha o1 [Source:HGNC Symbol;Acc:HGNC:4389]	3834	3055	3716	3862
ENSG00000087263	OGFOD1	5779	16	56451521	56479104	2-oxoglutarate and iron dependent oxygenase domain containing 1 [Source:HGNC Symbol;Acc:HGNC:25585]	2283	2614	2381	2127
ENSG00000087266	SH3BP2	13918	4	2793071	2841098	SH3 domain binding protein 2 [Source:HGNC Symbol;Acc:HGNC:10825]	3747	3203	3562	3893
ENSG00000087269	NOP14	3559	4	2937933	2963406	NOP14 nucleolar protein [Source:HGNC Symbol;Acc:HGNC:16821]	1476	1295	1551	1581
ENSG00000087274	ADD1	13240	4	2843844	2930076	adducin 1 [Source:HGNC Symbol;Acc:HGNC:243]	3804	4016	4982	4454
ENSG00000087299	L2HGDH	6560	14	50237563	50312229	L-2-hydroxyglutarate dehydrogenase [Source:HGNC Symbol;Acc:HGNC:20499]	908	1154	1108	932
ENSG00000087301	TXNDC16	4733	14	52430596	52552522	thioredoxin domain containing 16 [Source:HGNC Symbol;Acc:HGNC:19965]	537	613	573	548
ENSG00000087302	RTRAF	8287	14	51989514	52010694	RNA transcription, translation and transport factor [Source:HGNC Symbol;Acc:HGNC:23169]	1318	1918	1773	1875
ENSG00000087303	NID2	6217	14	52004809	52069059	nidogen 2 [Source:HGNC Symbol;Acc:HGNC:13389]	3	1	11	9
ENSG00000087338	GMCL1	4892	2	69829660	69881384	germ cell-less 1, spermatogenesis associated [Source:HGNC Symbol;Acc:HGNC:23843]	1287	1541	2186	2007
ENSG00000087365	SF3B2	9795	11	66050729	66069308	splicing factor 3b subunit 2 [Source:HGNC Symbol;Acc:HGNC:10769]	14331	11914	11750	11951
ENSG00000087448	KLHL42	7594	12	27780048	27803040	kelch like family member 42 [Source:HGNC Symbol;Acc:HGNC:29252]	2114	2228	1884	1689
ENSG00000087460	GNAS	22221	20	58839718	58911192	GNAS complex locus [Source:HGNC Symbol;Acc:HGNC:4392]	18331	18932	18095	16494
ENSG00000087470	DNM1L	8061	12	32679200	32745650	dynamin 1 like [Source:HGNC Symbol;Acc:HGNC:2973]	3720	3611	3360	3457
ENSG00000087494	PTHLH	3405	12	27958084	27972733	parathyroid hormone like hormone [Source:HGNC Symbol;Acc:HGNC:9607]	9	7	17	6
ENSG00000087495	PHACTR3	6103	20	59577509	59847711	phosphatase and actin regulator 3 [Source:HGNC Symbol;Acc:HGNC:15833]	0	0	4	8
ENSG00000087502	ERGIC2	5826	12	29337352	29381189	ERGIC and golgi 2 [Source:HGNC Symbol;Acc:HGNC:30208]	658	815	1262	1440
ENSG00000087510	TFAP2C	3001	20	56629306	56639283	transcription factor AP-2 gamma [Source:HGNC Symbol;Acc:HGNC:11744]	4923	4607	4089	4163
ENSG00000087586	AURKA	2928	20	56369389	56392337	aurora kinase A [Source:HGNC Symbol;Acc:HGNC:11393]	1702	1869	3426	2921
ENSG00000087589	CASS4	5070	20	56412112	56460387	Cas scaffold protein family member 4 [Source:HGNC Symbol;Acc:HGNC:15878]	0	4	0	1
ENSG00000087842	PIR	2512	X	15384799	15493564	pirin [Source:HGNC Symbol;Acc:HGNC:30048]	393	424	466	443
ENSG00000087884	AAMDC	1936	11	77821109	77918432	adipogenesis associated Mth938 domain containing [Source:HGNC Symbol;Acc:HGNC:30205]	104	120	117	132
ENSG00000087903	RFX2	9094	19	5993164	6199572	regulatory factor X2 [Source:HGNC Symbol;Acc:HGNC:9983]	297	364	281	337
ENSG00000087995	METTL2A	6398	17	62423875	62453385	methyltransferase 2A, methylcytidine [Source:HGNC Symbol;Acc:HGNC:25755]	1135	1082	1066	1289
ENSG00000088002	SULT2B1	2725	19	48552172	48599425	sulfotransferase family 2B member 1 [Source:HGNC Symbol;Acc:HGNC:11459]	667	797	1079	914
ENSG00000088035	ALG6	5487	1	63367575	63438553	ALG6 alpha-1,3-glucosyltransferase [Source:HGNC Symbol;Acc:HGNC:23157]	908	1090	1023	1115
ENSG00000088038	CNOT3	6821	19	54137749	54155681	CCR4-NOT transcription complex subunit 3 [Source:HGNC Symbol;Acc:HGNC:7879]	2263	1814	2666	2434
ENSG00000088053	GP6	2703	19	55013705	55038264	glycoprotein VI platelet [Source:HGNC Symbol;Acc:HGNC:14388]	18	6	13	10
ENSG00000088179	PTPN4	13276	2	119759922	119984899	protein tyrosine phosphatase non-receptor type 4 [Source:HGNC Symbol;Acc:HGNC:9656]	1007	1245	1491	1382
ENSG00000088205	DDX18	7808	2	117814691	117832377	DEAD-box helicase 18 [Source:HGNC Symbol;Acc:HGNC:2741]	3264	3861	5186	4663
ENSG00000088247	KHSRP	5162	19	6413102	6424811	KH-type splicing regulatory protein [Source:HGNC Symbol;Acc:HGNC:6316]	10594	9739	10752	10570
ENSG00000088256	GNA11	6285	19	3094362	3123999	G protein subunit alpha 11 [Source:HGNC Symbol;Acc:HGNC:4379]	3208	3119	2017	1864
ENSG00000088280	ASAP3	4988	1	23428563	23484568	ArfGAP with SH3 domain, ankyrin repeat and PH domain 3 [Source:HGNC Symbol;Acc:HGNC:14987]	1050	851	1067	1002
ENSG00000088298	EDEM2	1884	20	35115364	35147336	ER degradation enhancing alpha-mannosidase like protein 2 [Source:HGNC Symbol;Acc:HGNC:15877]	859	962	1029	892
ENSG00000088305	DNMT3B	6876	20	32762385	32809359	DNA methyltransferase 3 beta [Source:HGNC Symbol;Acc:HGNC:2979]	403	473	543	481
ENSG00000088325	TPX2	3605	20	31739271	31801805	TPX2 microtubule nucleation factor [Source:HGNC Symbol;Acc:HGNC:1249]	4949	5039	7534	7438
ENSG00000088340	FER1L4	10228	20	35558737	35607562	fer-1 like family member 4 (pseudogene) [Source:HGNC Symbol;Acc:HGNC:15801]	30	35	72	67
ENSG00000088356	PDRG1	1957	20	31944337	31952046	p53 and DNA damage regulated 1 [Source:HGNC Symbol;Acc:HGNC:16119]	805	1023	609	595
ENSG00000088367	EPB41L1	9676	20	36091504	36232799	erythrocyte membrane protein band 4.1 like 1 [Source:HGNC Symbol;Acc:HGNC:3378]	5071	4467	3691	3889
ENSG00000088386	SLC15A1	4210	13	98683801	98752672	solute carrier family 15 member 1 [Source:HGNC Symbol;Acc:HGNC:10920]	191	153	231	233
ENSG00000088387	DOCK9	15065	13	98793429	99086625	dedicator of cytokinesis 9 [Source:HGNC Symbol;Acc:HGNC:14132]	5697	5376	6626	7052
ENSG00000088448	ANKRD10	4563	13	110878540	110915069	ankyrin repeat domain 10 [Source:HGNC Symbol;Acc:HGNC:20265]	2802	3107	3238	3196
ENSG00000088451	TGDS	2571	13	94574054	94596242	TDP-glucose 4,6-dehydratase [Source:HGNC Symbol;Acc:HGNC:20324]	131	183	520	403
ENSG00000088538	DOCK3	9069	3	50674927	51384198	dedicator of cytokinesis 3 [Source:HGNC Symbol;Acc:HGNC:2989]	769	706	633	597
ENSG00000088543	C3orf18	3244	3	50558025	50571027	chromosome 3 open reading frame 18 [Source:HGNC Symbol;Acc:HGNC:24837]	16	11	28	38
ENSG00000088682	COQ9	4319	16	57447425	57461270	coenzyme Q9 [Source:HGNC Symbol;Acc:HGNC:25302]	2547	2606	2133	2256
ENSG00000088726	TMEM40	3297	3	12733528	12769457	transmembrane protein 40 [Source:HGNC Symbol;Acc:HGNC:25620]	514	612	326	332
ENSG00000088727	KIF9	5878	3	47227998	47283451	kinesin family member 9 [Source:HGNC Symbol;Acc:HGNC:16666]	107	135	83	85
ENSG00000088756	ARHGAP28	11912	18	6729716	6915716	Rho GTPase activating protein 28 [Source:HGNC Symbol;Acc:HGNC:25509]	498	664	470	519
ENSG00000088766	CRLS1	5367	20	6006093	6040053	cardiolipin synthase 1 [Source:HGNC Symbol;Acc:HGNC:16148]	266	301	286	205
ENSG00000088808	PPP1R13B	9573	14	103733195	103847575	protein phosphatase 1 regulatory subunit 13B [Source:HGNC Symbol;Acc:HGNC:14950]	2119	2051	2126	2011
ENSG00000088812	ATRN	8771	20	3471018	3651118	attractin [Source:HGNC Symbol;Acc:HGNC:885]	5101	4750	5422	5188
ENSG00000088826	SMOX	2946	20	4120980	4187747	spermine oxidase [Source:HGNC Symbol;Acc:HGNC:15862]	1016	1125	963	841
ENSG00000088827	SIGLEC1	8126	20	3686970	3712600	sialic acid binding Ig like lectin 1 [Source:HGNC Symbol;Acc:HGNC:11127]	2	0	2	0
ENSG00000088832	FKBP1A	5973	20	1368977	1393164	FKBP prolyl isomerase 1A [Source:HGNC Symbol;Acc:HGNC:3711]	6609	7177	7691	6413
ENSG00000088833	NSFL1C	5757	20	1442162	1473842	NSFL1 cofactor [Source:HGNC Symbol;Acc:HGNC:15912]	5966	5578	5598	5328
ENSG00000088836	SLC4A11	4319	20	3227417	3239559	solute carrier family 4 member 11 [Source:HGNC Symbol;Acc:HGNC:16438]	2291	2127	2989	3112
ENSG00000088854	DNAAF9	8584	20	3249306	3407669	dynein axonemal assembly factor 9 [Source:HGNC Symbol;Acc:HGNC:17721]	643	607	654	542
ENSG00000088876	ZNF343	4643	20	2481817	2524702	zinc finger protein 343 [Source:HGNC Symbol;Acc:HGNC:16017]	293	362	487	529
ENSG00000088881	EBF4	4060	20	2692780	2760108	EBF family member 4 [Source:HGNC Symbol;Acc:HGNC:29278]	211	153	465	451
ENSG00000088882	CPXM1	2376	20	2794074	2800627	carboxypeptidase X, M14 family member 1 [Source:HGNC Symbol;Acc:HGNC:15771]	0	6	14	5
ENSG00000088888	MAVS	11771	20	3846799	3876123	mitochondrial antiviral signaling protein [Source:HGNC Symbol;Acc:HGNC:29233]	13057	11119	11904	13358
ENSG00000088899	LZTS3	5352	20	3162617	3173549	leucine zipper tumor suppressor family member 3 [Source:HGNC Symbol;Acc:HGNC:30139]	5174	4869	4470	4658
ENSG00000088930	XRN2	3408	20	21303331	21389825	5'-3' exoribonuclease 2 [Source:HGNC Symbol;Acc:HGNC:12836]	5313	5760	6047	5784
ENSG00000088970	KIZ	5207	20	21125983	21246622	kizuna centrosomal protein [Source:HGNC Symbol;Acc:HGNC:15865]	77	105	162	201
ENSG00000088986	DYNLL1	2931	12	120469850	120498493	dynein light chain LC8-type 1 [Source:HGNC Symbol;Acc:HGNC:15476]	3238	4391	4001	3468
ENSG00000088992	TESC	1926	12	117038923	117099479	tescalcin [Source:HGNC Symbol;Acc:HGNC:26065]	0	1	0	0
ENSG00000089006	SNX5	7953	20	17941597	17968980	sorting nexin 5 [Source:HGNC Symbol;Acc:HGNC:14969]	1969	2605	3250	3072
ENSG00000089009	RPL6	4442	12	112405189	112418838	ribosomal protein L6 [Source:HGNC Symbol;Acc:HGNC:10362]	11987	13723	15731	14269
ENSG00000089012	SIRPG	2242	20	1629152	1657779	signal regulatory protein gamma [Source:HGNC Symbol;Acc:HGNC:15757]	24	38	36	42
ENSG00000089022	MAPKAPK5	13955	12	111842013	111902222	MAPK activated protein kinase 5 [Source:HGNC Symbol;Acc:HGNC:6889]	1024	1103	1387	1320
ENSG00000089041	P2RX7	5546	12	121132819	121188032	purinergic receptor P2X 7 [Source:HGNC Symbol;Acc:HGNC:8537]	70	104	82	97
ENSG00000089048	ESF1	3249	20	13714322	13784919	ESF1 nucleolar pre-rRNA processing protein homolog [Source:HGNC Symbol;Acc:HGNC:15898]	673	769	844	842
ENSG00000089050	RBBP9	3843	20	18486540	18497225	RB binding protein 9, serine hydrolase [Source:HGNC Symbol;Acc:HGNC:9892]	2452	2873	3442	3411
ENSG00000089053	ANAPC5	12259	12	121308245	121399896	anaphase promoting complex subunit 5 [Source:HGNC Symbol;Acc:HGNC:15713]	3445	3426	3637	3632
ENSG00000089057	SLC23A2	7526	20	4852356	5010293	solute carrier family 23 member 2 [Source:HGNC Symbol;Acc:HGNC:10973]	2995	2490	4154	4267
ENSG00000089060	SLC8B1	6768	12	113298759	113359493	solute carrier family 8 member B1 [Source:HGNC Symbol;Acc:HGNC:26175]	1330	1461	1053	964
ENSG00000089063	TMEM230	3051	20	5068232	5113103	transmembrane protein 230 [Source:HGNC Symbol;Acc:HGNC:15876]	2366	3080	2514	2289
ENSG00000089091	DZANK1	8411	20	18383367	18467281	double zinc ribbon and ankyrin repeat domains 1 [Source:HGNC Symbol;Acc:HGNC:15858]	103	89	105	139
ENSG00000089094	KDM2B	13632	12	121429096	121581023	lysine demethylase 2B [Source:HGNC Symbol;Acc:HGNC:13610]	1581	1294	1036	1105
ENSG00000089101	CFAP61	7915	20	20052514	20360703	cilia and flagella associated protein 61 [Source:HGNC Symbol;Acc:HGNC:15872]	2	0	2	2
ENSG00000089116	LHX5	3063	12	113462033	113472280	LIM homeobox 5 [Source:HGNC Symbol;Acc:HGNC:14216]	0	0	0	0
ENSG00000089123	TASP1	2897	20	13389392	13638932	taspase 1 [Source:HGNC Symbol;Acc:HGNC:15859]	505	517	554	379
ENSG00000089127	OAS1	13021	12	112905856	112933219	2'-5'-oligoadenylate synthetase 1 [Source:HGNC Symbol;Acc:HGNC:8086]	361	361	299	313
ENSG00000089154	GCN1	9660	12	120127202	120194715	GCN1 activator of EIF2AK4 [Source:HGNC Symbol;Acc:HGNC:4199]	14974	11915	12313	11473
ENSG00000089157	RPLP0	3988	12	120196699	120201235	ribosomal protein lateral stalk subunit P0 [Source:HGNC Symbol;Acc:HGNC:10371]	29846	28644	37180	35485
ENSG00000089159	PXN	7460	12	120210439	120265771	paxillin [Source:HGNC Symbol;Acc:HGNC:9718]	2295	2141	1649	1632
ENSG00000089163	SIRT4	1222	12	120302316	120313249	sirtuin 4 [Source:HGNC Symbol;Acc:HGNC:14932]	13	20	20	25
ENSG00000089169	RPH3A	10276	12	112570380	112898881	rabphilin 3A [Source:HGNC Symbol;Acc:HGNC:17056]	0	0	0	0
ENSG00000089177	KIF16B	7733	20	16272104	16573448	kinesin family member 16B [Source:HGNC Symbol;Acc:HGNC:15869]	1768	1620	1490	1459
ENSG00000089195	TRMT6	3783	20	5937228	5950558	tRNA methyltransferase 6 non-catalytic subunit [Source:HGNC Symbol;Acc:HGNC:20900]	2464	2754	2478	2320
ENSG00000089199	CHGB	4447	20	5911510	5925353	chromogranin B [Source:HGNC Symbol;Acc:HGNC:1930]	0	2	2	0
ENSG00000089220	PEBP1	1514	12	118136124	118145584	phosphatidylethanolamine binding protein 1 [Source:HGNC Symbol;Acc:HGNC:8630]	7439	7484	6729	6518
ENSG00000089234	BRAP	4656	12	111642146	111685956	BRCA1 associated protein [Source:HGNC Symbol;Acc:HGNC:1099]	1155	1125	1206	1308
ENSG00000089248	ERP29	3049	12	112013348	112023449	endoplasmic reticulum protein 29 [Source:HGNC Symbol;Acc:HGNC:13799]	1487	2094	2190	2053
ENSG00000089280	FUS	6989	16	31180138	31191605	FUS RNA binding protein [Source:HGNC Symbol;Acc:HGNC:4010]	10821	11950	10313	11453
ENSG00000089289	IGBP1	1864	X	70133447	70166324	immunoglobulin binding protein 1 [Source:HGNC Symbol;Acc:HGNC:5461]	1035	1066	1232	1125
ENSG00000089327	FXYD5	2991	19	35154730	35169881	FXYD domain containing ion transport regulator 5 [Source:HGNC Symbol;Acc:HGNC:4029]	5543	6285	4951	4264
ENSG00000089335	ZNF302	5032	19	34677639	34686397	zinc finger protein 302 [Source:HGNC Symbol;Acc:HGNC:13848]	788	1006	1038	1018
ENSG00000089351	GRAMD1A	5906	19	34994784	35026471	GRAM domain containing 1A [Source:HGNC Symbol;Acc:HGNC:29305]	5779	5266	5324	5184
ENSG00000089356	FXYD3	3390	19	35115823	35124324	FXYD domain containing ion transport regulator 3 [Source:HGNC Symbol;Acc:HGNC:4027]	83	87	211	213
ENSG00000089472	HEPH	9888	X	66162671	66268867	hephaestin [Source:HGNC Symbol;Acc:HGNC:4866]	6	2	0	0
ENSG00000089486	CDIP1	4274	16	4510669	4538828	cell death inducing p53 target 1 [Source:HGNC Symbol;Acc:HGNC:13234]	1	3	2	0
ENSG00000089505	CMTM1	1465	16	66566393	66579137	CKLF like MARVEL transmembrane domain containing 1 [Source:HGNC Symbol;Acc:HGNC:19172]	84	56	58	28
ENSG00000089558	KCNH4	3788	17	42156891	42181142	potassium voltage-gated channel subfamily H member 4 [Source:HGNC Symbol;Acc:HGNC:6253]	14	15	11	8
ENSG00000089597	GANAB	5030	11	62624826	62646726	glucosidase II alpha subunit [Source:HGNC Symbol;Acc:HGNC:4138]	23127	21434	9215	9286
ENSG00000089639	GMIP	3730	19	19629476	19643657	GEM interacting protein [Source:HGNC Symbol;Acc:HGNC:24852]	2370	1922	2807	2927
ENSG00000089682	RBM41	9177	X	107061885	107118823	RNA binding motif protein 41 [Source:HGNC Symbol;Acc:HGNC:25617]	1255	1259	1603	1728
ENSG00000089685	BIRC5	3815	17	78214186	78225636	baculoviral IAP repeat containing 5 [Source:HGNC Symbol;Acc:HGNC:593]	3925	3806	4181	4179
ENSG00000089692	LAG3	3056	12	6772512	6778455	lymphocyte activating 3 [Source:HGNC Symbol;Acc:HGNC:6476]	16	11	14	9
ENSG00000089693	MLF2	3367	12	6747996	6767475	myeloid leukemia factor 2 [Source:HGNC Symbol;Acc:HGNC:7126]	5758	5663	5652	5401
ENSG00000089723	OTUB2	4241	14	94026340	94048930	OTU deubiquitinase, ubiquitin aldehyde binding 2 [Source:HGNC Symbol;Acc:HGNC:20351]	71	83	79	64
ENSG00000089737	DDX24	8597	14	94048287	94081202	DEAD-box helicase 24 [Source:HGNC Symbol;Acc:HGNC:13266]	3907	3227	2940	3031
ENSG00000089775	ZBTB25	12222	14	64449106	64505213	zinc finger and BTB domain containing 25 [Source:HGNC Symbol;Acc:HGNC:13112]	293	325	387	512
ENSG00000089818	NECAP1	8785	12	8076939	8097881	NECAP endocytosis associated 1 [Source:HGNC Symbol;Acc:HGNC:24539]	554	565	537	436
ENSG00000089820	ARHGAP4	5580	X	153907367	153934999	Rho GTPase activating protein 4 [Source:HGNC Symbol;Acc:HGNC:674]	67	59	126	113
ENSG00000089847	ANKRD24	4522	19	4182689	4224814	ankyrin repeat domain 24 [Source:HGNC Symbol;Acc:HGNC:29424]	6	0	3	3
ENSG00000089876	DHX32	3925	10	125836337	125896436	DEAH-box helicase 32 (putative) [Source:HGNC Symbol;Acc:HGNC:16717]	1517	1629	1492	1515
ENSG00000089902	RCOR1	6199	14	102592649	102730561	REST corepressor 1 [Source:HGNC Symbol;Acc:HGNC:17441]	2317	2087	2680	2711
ENSG00000089916	GPATCH2L	21987	14	76151916	76254342	G-patch domain containing 2 like [Source:HGNC Symbol;Acc:HGNC:20210]	1063	1031	1594	1504
ENSG00000090006	LTBP4	8110	19	40592883	40629818	latent transforming growth factor beta binding protein 4 [Source:HGNC Symbol;Acc:HGNC:6717]	266	335	763	684
ENSG00000090013	BLVRB	1613	19	40447765	40465764	biliverdin reductase B [Source:HGNC Symbol;Acc:HGNC:1063]	1577	1631	1865	1764
ENSG00000090020	SLC9A1	6195	1	27098809	27166981	solute carrier family 9 member A1 [Source:HGNC Symbol;Acc:HGNC:11071]	2161	1881	1674	1786
ENSG00000090054	SPTLC1	10589	9	92000087	92115413	serine palmitoyltransferase long chain base subunit 1 [Source:HGNC Symbol;Acc:HGNC:11277]	1202	1481	1900	1953
ENSG00000090060	PAPOLA	13609	14	96501433	96567116	poly(A) polymerase alpha [Source:HGNC Symbol;Acc:HGNC:14981]	6515	6806	9287	8779
ENSG00000090061	CCNK	8220	14	99481169	99535044	cyclin K [Source:HGNC Symbol;Acc:HGNC:1596]	509	513	536	584
ENSG00000090097	PCBP4	3738	3	51957454	51974016	poly(rC) binding protein 4 [Source:HGNC Symbol;Acc:HGNC:8652]	905	863	660	638
ENSG00000090104	RGS1	4074	1	192575763	192580024	regulator of G protein signaling 1 [Source:HGNC Symbol;Acc:HGNC:9991]	0	0	0	0
ENSG00000090238	YPEL3	3181	16	30092314	30096915	yippee like 3 [Source:HGNC Symbol;Acc:HGNC:18327]	489	576	556	596
ENSG00000090263	MRPS33	5245	7	141002610	141015228	mitochondrial ribosomal protein S33 [Source:HGNC Symbol;Acc:HGNC:16634]	381	648	553	488
ENSG00000090266	NDUFB2	4447	7	140690777	140722790	NADH:ubiquinone oxidoreductase subunit B2 [Source:HGNC Symbol;Acc:HGNC:7697]	633	953	786	787
ENSG00000090273	NUDC	2848	1	26900238	26946871	nuclear distribution C, dynein complex regulator [Source:HGNC Symbol;Acc:HGNC:8045]	4467	4162	3816	3899
ENSG00000090316	MAEA	9821	4	1289887	1340147	macrophage erythroblast attacher, E3 ubiquitin ligase [Source:HGNC Symbol;Acc:HGNC:13731]	2358	2582	2592	2331
ENSG00000090339	ICAM1	3448	19	10271093	10286615	intercellular adhesion molecule 1 [Source:HGNC Symbol;Acc:HGNC:5344]	8155	7002	6906	6429
ENSG00000090372	STRN4	7637	19	46719511	46746994	striatin 4 [Source:HGNC Symbol;Acc:HGNC:15721]	6812	6084	5798	5031
ENSG00000090376	IRAK3	9688	12	66189195	66254622	interleukin 1 receptor associated kinase 3 [Source:HGNC Symbol;Acc:HGNC:17020]	354	345	510	439
ENSG00000090432	MUL1	2428	1	20499448	20508151	mitochondrial E3 ubiquitin protein ligase 1 [Source:HGNC Symbol;Acc:HGNC:25762]	841	861	894	714
ENSG00000090447	TFAP4	7867	16	4257186	4273075	transcription factor AP-4 [Source:HGNC Symbol;Acc:HGNC:11745]	518	477	614	634
ENSG00000090470	PDCD7	3235	15	65117379	65133808	programmed cell death 7 [Source:HGNC Symbol;Acc:HGNC:8767]	558	704	975	754
ENSG00000090487	SPG21	3983	15	64963022	64990310	SPG21 abhydrolase domain containing, maspardin [Source:HGNC Symbol;Acc:HGNC:20373]	2015	2179	2945	2741
ENSG00000090520	DNAJB11	9385	3	186567403	186585800	DnaJ heat shock protein family (Hsp40) member B11 [Source:HGNC Symbol;Acc:HGNC:14889]	705	805	1640	1523
ENSG00000090530	P3H2	5573	3	189956728	190122437	prolyl 3-hydroxylase 2 [Source:HGNC Symbol;Acc:HGNC:19317]	1103	1162	566	503
ENSG00000090534	THPO	2705	3	184371935	184381968	thrombopoietin [Source:HGNC Symbol;Acc:HGNC:11795]	0	0	0	0
ENSG00000090539	CHRD	6639	3	184380054	184390736	chordin [Source:HGNC Symbol;Acc:HGNC:1949]	15	14	33	21
ENSG00000090554	FLT3LG	2846	19	49474207	49486231	fms related receptor tyrosine kinase 3 ligand [Source:HGNC Symbol;Acc:HGNC:3766]	12	2	9	14
ENSG00000090565	RAB11FIP3	6287	16	425649	523011	RAB11 family interacting protein 3 [Source:HGNC Symbol;Acc:HGNC:17224]	1861	1721	1375	1438
ENSG00000090581	GNPTG	5718	16	1351931	1365737	N-acetylglucosamine-1-phosphate transferase subunit gamma [Source:HGNC Symbol;Acc:HGNC:23026]	488	498	639	663
ENSG00000090612	ZNF268	14096	12	133181409	133214832	zinc finger protein 268 [Source:HGNC Symbol;Acc:HGNC:13061]	500	476	464	552
ENSG00000090615	GOLGA3	14822	12	132768902	132829143	golgin A3 [Source:HGNC Symbol;Acc:HGNC:4426]	6849	5643	6728	6625
ENSG00000090621	PABPC4	10274	1	39560709	39576790	poly(A) binding protein cytoplasmic 4 [Source:HGNC Symbol;Acc:HGNC:8557]	17684	16948	21273	20926
ENSG00000090661	CERS4	4059	19	8206736	8262421	ceramide synthase 4 [Source:HGNC Symbol;Acc:HGNC:23747]	1496	1309	1436	1413
ENSG00000090674	MCOLN1	3958	19	7522624	7534009	mucolipin TRP cation channel 1 [Source:HGNC Symbol;Acc:HGNC:13356]	557	399	628	631
ENSG00000090686	USP48	9497	1	21678298	21783606	ubiquitin specific peptidase 48 [Source:HGNC Symbol;Acc:HGNC:18533]	1944	1959	2189	2240
ENSG00000090776	EFNB1	3303	X	68829021	68842160	ephrin B1 [Source:HGNC Symbol;Acc:HGNC:3226]	426	427	598	580
ENSG00000090857	PDPR	9679	16	70114332	70162537	pyruvate dehydrogenase phosphatase regulatory subunit [Source:HGNC Symbol;Acc:HGNC:30264]	1637	1397	1638	1568
ENSG00000090861	AARS1	10248	16	70251983	70289707	alanyl-tRNA synthetase 1 [Source:HGNC Symbol;Acc:HGNC:20]	8245	7381	6399	6666
ENSG00000090863	GLG1	14111	16	74447427	74607144	golgi glycoprotein 1 [Source:HGNC Symbol;Acc:HGNC:4316]	8879	7921	8989	9268
ENSG00000090889	KIF4A	4573	X	70290104	70420886	kinesin family member 4A [Source:HGNC Symbol;Acc:HGNC:13339]	2786	2824	3944	3789
ENSG00000090905	TNRC6A	12968	16	24610209	24827632	trinucleotide repeat containing adaptor 6A [Source:HGNC Symbol;Acc:HGNC:11969]	3621	3380	3220	2975
ENSG00000090924	PLEKHG2	9116	19	39412669	39428415	pleckstrin homology and RhoGEF domain containing G2 [Source:HGNC Symbol;Acc:HGNC:29515]	1532	1381	2332	2649
ENSG00000090932	DLL3	2618	19	39498895	39508481	delta like canonical Notch ligand 3 [Source:HGNC Symbol;Acc:HGNC:2909]	86	55	70	69
ENSG00000090971	NAT14	1979	19	55485188	55487568	N-acetyltransferase 14 (putative) [Source:HGNC Symbol;Acc:HGNC:28918]	514	688	498	405
ENSG00000090975	PITPNM2	9499	12	122983480	123151090	phosphatidylinositol transfer protein membrane associated 2 [Source:HGNC Symbol;Acc:HGNC:21044]	606	535	542	515
ENSG00000090989	EXOC1	5367	4	55853648	55905086	exocyst complex component 1 [Source:HGNC Symbol;Acc:HGNC:30380]	787	942	994	989
ENSG00000091009	RBM27	6664	5	146203605	146289223	RNA binding motif protein 27 [Source:HGNC Symbol;Acc:HGNC:29243]	587	747	985	922
ENSG00000091010	POU4F3	2575	5	146338839	146341728	POU class 4 homeobox 3 [Source:HGNC Symbol;Acc:HGNC:9220]	14	6	4	12
ENSG00000091039	OSBPL8	9198	12	76351797	76559809	oxysterol binding protein like 8 [Source:HGNC Symbol;Acc:HGNC:16396]	1942	2005	2663	2670
ENSG00000091073	DTX2	5042	7	76461676	76505995	deltex E3 ubiquitin ligase 2 [Source:HGNC Symbol;Acc:HGNC:15973]	2655	2384	2053	2204
ENSG00000091106	NLRC4	3788	2	32224453	32265732	NLR family CARD domain containing 4 [Source:HGNC Symbol;Acc:HGNC:16412]	5	4	18	20
ENSG00000091127	PUS7	4433	7	105439661	105522271	pseudouridine synthase 7 [Source:HGNC Symbol;Acc:HGNC:26033]	847	896	1367	1241
ENSG00000091128	LAMB4	7021	7	108023548	108130361	laminin subunit beta 4 [Source:HGNC Symbol;Acc:HGNC:6491]	0	1	8	0
ENSG00000091129	NRCAM	7975	7	108147623	108456717	neuronal cell adhesion molecule [Source:HGNC Symbol;Acc:HGNC:7994]	0	0	0	2
ENSG00000091136	LAMB1	18592	7	107923799	108003213	laminin subunit beta 1 [Source:HGNC Symbol;Acc:HGNC:6486]	6575	5763	5387	5529
ENSG00000091137	SLC26A4	5607	7	107660828	107717809	solute carrier family 26 member 4 [Source:HGNC Symbol;Acc:HGNC:8818]	9	3	12	26
ENSG00000091138	SLC26A3	3382	7	107765467	107803225	solute carrier family 26 member 3 [Source:HGNC Symbol;Acc:HGNC:3018]	0	0	4	10
ENSG00000091140	DLD	5102	7	107891162	107931730	dihydrolipoamide dehydrogenase [Source:HGNC Symbol;Acc:HGNC:2898]	3913	4632	4526	4412
ENSG00000091157	WDR7	8899	18	56651343	57029811	WD repeat domain 7 [Source:HGNC Symbol;Acc:HGNC:13490]	885	776	859	928
ENSG00000091164	TXNL1	11297	18	56597209	56651600	thioredoxin like 1 [Source:HGNC Symbol;Acc:HGNC:12436]	2032	1856	2392	2425
ENSG00000091181	IL5RA	6602	3	3066324	3126613	interleukin 5 receptor subunit alpha [Source:HGNC Symbol;Acc:HGNC:6017]	0	0	0	0
ENSG00000091262	ABCC6	6908	16	16149565	16223522	ATP binding cassette subfamily C member 6 [Source:HGNC Symbol;Acc:HGNC:57]	11	11	23	10
ENSG00000091317	CMTM6	3857	3	32481312	32502852	CKLF like MARVEL transmembrane domain containing 6 [Source:HGNC Symbol;Acc:HGNC:19177]	1867	2330	2866	2607
ENSG00000091409	ITGA6	6679	2	172427354	172506459	integrin subunit alpha 6 [Source:HGNC Symbol;Acc:HGNC:6142]	6361	6456	4566	4484
ENSG00000091428	RAPGEF4	7125	2	172735274	173052893	Rap guanine nucleotide exchange factor 4 [Source:HGNC Symbol;Acc:HGNC:16626]	24	29	22	43
ENSG00000091436	MAP3K20	13804	2	173075435	173268015	mitogen-activated protein kinase kinase kinase 20 [Source:HGNC Symbol;Acc:HGNC:17797]	5543	5792	6675	6428
ENSG00000091482	SMPX	1324	X	21705978	21758116	small muscle protein X-linked [Source:HGNC Symbol;Acc:HGNC:11122]	4	0	0	0
ENSG00000091483	FH	9350	1	241497511	241519799	fumarate hydratase [Source:HGNC Symbol;Acc:HGNC:3700]	3063	3568	7540	7147
ENSG00000091490	SEL1L3	7483	4	25747433	25863760	SEL1L family member 3 [Source:HGNC Symbol;Acc:HGNC:29108]	1507	1463	1788	1663
ENSG00000091513	TF	26038	3	133746040	133796641	transferrin [Source:HGNC Symbol;Acc:HGNC:11740]	30	39	62	67
ENSG00000091527	CDV3	4411	3	133573686	133590261	CDV3 homolog [Source:HGNC Symbol;Acc:HGNC:26928]	10820	12485	9025	8314
ENSG00000091536	MYO15A	19944	17	18108756	18179802	myosin XVA [Source:HGNC Symbol;Acc:HGNC:7594]	4	6	10	0
ENSG00000091542	ALKBH5	3601	17	18183078	18209954	alkB homolog 5, RNA demethylase [Source:HGNC Symbol;Acc:HGNC:25996]	2680	2424	3136	2879
ENSG00000091592	NLRP1	20157	17	5499415	5619424	NLR family pyrin domain containing 1 [Source:HGNC Symbol;Acc:HGNC:14374]	4	4	0	10
ENSG00000091622	PITPNM3	10671	17	6451263	6556555	PITPNM family member 3 [Source:HGNC Symbol;Acc:HGNC:21043]	3672	3106	2649	2684
ENSG00000091640	SPAG7	2776	17	4959226	4967817	sperm associated antigen 7 [Source:HGNC Symbol;Acc:HGNC:11216]	517	591	535	550
ENSG00000091651	ORC6	4309	16	46689643	46698394	origin recognition complex subunit 6 [Source:HGNC Symbol;Acc:HGNC:17151]	811	984	1346	1580
ENSG00000091656	ZFHX4	15851	8	76681239	76867281	zinc finger homeobox 4 [Source:HGNC Symbol;Acc:HGNC:30939]	0	0	0	0
ENSG00000091704	CPA1	2837	7	130380339	130388114	carboxypeptidase A1 [Source:HGNC Symbol;Acc:HGNC:2296]	0	0	0	2
ENSG00000091732	ZC3HC1	3010	7	130018287	130051451	zinc finger C3HC-type containing 1 [Source:HGNC Symbol;Acc:HGNC:29913]	513	587	613	634
ENSG00000091831	ESR1	13726	6	151656691	152129619	estrogen receptor 1 [Source:HGNC Symbol;Acc:HGNC:3467]	364	414	321	310
ENSG00000091844	RGS17	7932	6	153004459	153131282	regulator of G protein signaling 17 [Source:HGNC Symbol;Acc:HGNC:14088]	4	14	9	41
ENSG00000091879	ANGPT2	6794	8	6499632	6563409	angiopoietin 2 [Source:HGNC Symbol;Acc:HGNC:485]	0	0	0	0
ENSG00000091947	TMEM101	3029	17	44011188	44023946	transmembrane protein 101 [Source:HGNC Symbol;Acc:HGNC:28653]	690	733	726	778
ENSG00000091986	CCDC80	13068	3	112596797	112649530	coiled-coil domain containing 80 [Source:HGNC Symbol;Acc:HGNC:30649]	3234	2868	1403	1501
ENSG00000092010	PSME1	1776	14	24136163	24138967	proteasome activator subunit 1 [Source:HGNC Symbol;Acc:HGNC:9568]	2390	3046	2573	2283
ENSG00000092020	PPP2R3C	3863	14	35085467	35122517	protein phosphatase 2 regulatory subunit B''gamma [Source:HGNC Symbol;Acc:HGNC:17485]	169	205	307	263
ENSG00000092036	HAUS4	2539	14	22946228	22957161	HAUS augmin like complex subunit 4 [Source:HGNC Symbol;Acc:HGNC:20163]	167	209	222	185
ENSG00000092051	JPH4	5294	14	23568038	23578790	junctophilin 4 [Source:HGNC Symbol;Acc:HGNC:20156]	0	0	0	2
ENSG00000092068	SLC7A8	5991	14	23125295	23183674	solute carrier family 7 member 8 [Source:HGNC Symbol;Acc:HGNC:11066]	6	13	5	0
ENSG00000092094	OSGEP	5031	14	20446401	20455089	O-sialoglycoprotein endopeptidase [Source:HGNC Symbol;Acc:HGNC:18028]	1807	1971	2104	2105
ENSG00000092096	SLC22A17	4270	14	23346314	23352912	solute carrier family 22 member 17 [Source:HGNC Symbol;Acc:HGNC:23095]	40	19	87	65
ENSG00000092098	RNF31	6713	14	24146683	24160660	ring finger protein 31 [Source:HGNC Symbol;Acc:HGNC:16031]	29	37	64	93
ENSG00000092108	SCFD1	29169	14	30622291	30737694	sec1 family domain containing 1 [Source:HGNC Symbol;Acc:HGNC:20726]	1537	1967	1934	1818
ENSG00000092140	G2E3	9319	14	30559158	30620064	G2/M-phase specific E3 ubiquitin protein ligase [Source:HGNC Symbol;Acc:HGNC:20338]	616	759	948	889
ENSG00000092148	HECTD1	21483	14	31100117	31207804	HECT domain E3 ubiquitin protein ligase 1 [Source:HGNC Symbol;Acc:HGNC:20157]	3788	3487	5433	5436
ENSG00000092199	HNRNPC	7293	14	21209136	21269494	heterogeneous nuclear ribonucleoprotein C [Source:HGNC Symbol;Acc:HGNC:5035]	11765	13063	15827	15353
ENSG00000092200	RPGRIP1	5547	14	21280083	21351301	RPGR interacting protein 1 [Source:HGNC Symbol;Acc:HGNC:13436]	62	81	81	73
ENSG00000092201	SUPT16H	6900	14	21351476	21384019	SPT16 homolog, facilitates chromatin remodeling subunit [Source:HGNC Symbol;Acc:HGNC:11465]	4249	4173	5310	5454
ENSG00000092203	TOX4	7091	14	21476597	21499175	TOX high mobility group box family member 4 [Source:HGNC Symbol;Acc:HGNC:20161]	2394	1969	1953	2225
ENSG00000092208	GEMIN2	2695	14	39114285	39136973	gem nuclear organelle associated protein 2 [Source:HGNC Symbol;Acc:HGNC:10884]	179	215	250	268
ENSG00000092295	TGM1	3735	14	24249114	24264432	transglutaminase 1 [Source:HGNC Symbol;Acc:HGNC:11777]	1242	993	605	599
ENSG00000092330	TINF2	4378	14	24238286	24242663	TERF1 interacting nuclear factor 2 [Source:HGNC Symbol;Acc:HGNC:11824]	470	516	691	551
ENSG00000092345	DAZL	3555	3	16586792	16670306	deleted in azoospermia like [Source:HGNC Symbol;Acc:HGNC:2685]	0	0	0	0
ENSG00000092421	SEMA6A	10906	5	116443555	116574823	semaphorin 6A [Source:HGNC Symbol;Acc:HGNC:10738]	6	17	34	31
ENSG00000092439	TRPM7	12380	15	50552473	50686797	transient receptor potential cation channel subfamily M member 7 [Source:HGNC Symbol;Acc:HGNC:17994]	2828	2870	3304	3195
ENSG00000092445	TYRO3	10770	15	41557675	41583589	TYRO3 protein tyrosine kinase [Source:HGNC Symbol;Acc:HGNC:12446]	1410	1277	916	1074
ENSG00000092470	WDR76	4054	15	43826980	43868412	WD repeat domain 76 [Source:HGNC Symbol;Acc:HGNC:25773]	795	970	1160	1111
ENSG00000092529	CAPN3	12774	15	42359498	42412949	calpain 3 [Source:HGNC Symbol;Acc:HGNC:1480]	37	27	25	26
ENSG00000092531	SNAP23	5852	15	42491233	42545356	synaptosome associated protein 23 [Source:HGNC Symbol;Acc:HGNC:11131]	277	357	249	260
ENSG00000092607	TBX15	4344	1	118883046	118989556	T-box transcription factor 15 [Source:HGNC Symbol;Acc:HGNC:11594]	2	7	8	0
ENSG00000092621	PHGDH	9187	1	119648411	119744218	phosphoglycerate dehydrogenase [Source:HGNC Symbol;Acc:HGNC:8923]	7541	7207	6263	6086
ENSG00000092758	COL9A3	4841	20	62816244	62841159	collagen type IX alpha 3 chain [Source:HGNC Symbol;Acc:HGNC:2219]	20	11	21	14
ENSG00000092820	EZR	3286	6	158765741	158819368	ezrin [Source:HGNC Symbol;Acc:HGNC:12691]	22622	19834	18995	20038
ENSG00000092841	MYL6	4424	12	56158346	56163496	myosin light chain 6 [Source:HGNC Symbol;Acc:HGNC:7587]	5008	7064	3865	3289
ENSG00000092847	AGO1	14043	1	35869808	35930532	argonaute RISC component 1 [Source:HGNC Symbol;Acc:HGNC:3262]	9235	7592	6708	6609
ENSG00000092850	TEKT2	1959	1	36084094	36088275	tektin 2 [Source:HGNC Symbol;Acc:HGNC:11725]	27	20	12	30
ENSG00000092853	CLSPN	9591	1	35720218	35769978	claspin [Source:HGNC Symbol;Acc:HGNC:19715]	1778	2001	2627	2513
ENSG00000092871	RFFL	8367	17	35005990	35089319	ring finger and FYVE like domain containing E3 ubiquitin protein ligase [Source:HGNC Symbol;Acc:HGNC:24821]	618	463	556	565
ENSG00000092929	UNC13D	7802	17	75827225	75844785	unc-13 homolog D [Source:HGNC Symbol;Acc:HGNC:23147]	6098	5190	3591	3562
ENSG00000092931	MFSD11	6347	17	76735865	76781449	major facilitator superfamily domain containing 11 [Source:HGNC Symbol;Acc:HGNC:25458]	214	325	453	444
ENSG00000092964	DPYSL2	7296	8	26514031	26658178	dihydropyrimidinase like 2 [Source:HGNC Symbol;Acc:HGNC:3014]	2468	2046	3008	3061
ENSG00000092969	TGFB2	6050	1	218345336	218444619	transforming growth factor beta 2 [Source:HGNC Symbol;Acc:HGNC:11768]	18795	18047	8503	8255
ENSG00000092978	GPATCH2	8841	1	217426992	217631090	G-patch domain containing 2 [Source:HGNC Symbol;Acc:HGNC:25499]	638	671	850	880
ENSG00000093000	NUP50	8236	22	45163925	45188017	nucleoporin 50 [Source:HGNC Symbol;Acc:HGNC:8065]	5396	5073	6949	7472
ENSG00000093009	CDC45	2978	22	19479457	19520612	cell division cycle 45 [Source:HGNC Symbol;Acc:HGNC:1739]	911	1286	1562	1307
ENSG00000093010	COMT	7376	22	19941371	19969975	catechol-O-methyltransferase [Source:HGNC Symbol;Acc:HGNC:2228]	2632	2670	2885	2607
ENSG00000093072	ADA2	11032	22	17178790	17258235	adenosine deaminase 2 [Source:HGNC Symbol;Acc:HGNC:1839]	0	3	5	5
ENSG00000093100		4328	22	17787652	17811497	novel transcript	30	37	10	17
ENSG00000093134	VNN3P	6019	6	132722784	132736935	vanin 3, pseudogene [Source:HGNC Symbol;Acc:HGNC:16431]	102	108	129	115
ENSG00000093144	ECHDC1	5676	6	127288712	127343609	ethylmalonyl-CoA decarboxylase 1 [Source:HGNC Symbol;Acc:HGNC:21489]	6341	7563	7367	7391
ENSG00000093167	LRRFIP2	10674	3	37052626	37183689	LRR binding FLII interacting protein 2 [Source:HGNC Symbol;Acc:HGNC:6703]	1881	1931	2029	1968
ENSG00000093183	SEC22C	8159	3	42547969	42601080	SEC22 homolog C, vesicle trafficking protein [Source:HGNC Symbol;Acc:HGNC:16828]	1538	1636	1517	1621
ENSG00000093217	XYLB	6327	3	38346760	38421348	xylulokinase [Source:HGNC Symbol;Acc:HGNC:12839]	257	216	253	218
ENSG00000094631	HDAC6	14472	X	48801377	48824982	histone deacetylase 6 [Source:HGNC Symbol;Acc:HGNC:14064]	2909	2839	3798	3465
ENSG00000094661	OR1I1	6057	19	15082211	15092970	olfactory receptor family 1 subfamily I member 1 [Source:HGNC Symbol;Acc:HGNC:8207]	0	0	0	1
ENSG00000094755	GABRP	4621	5	170763350	170814047	gamma-aminobutyric acid type A receptor subunit pi [Source:HGNC Symbol;Acc:HGNC:4089]	14	14	19	4
ENSG00000094804	CDC6	5311	17	40287879	40304657	cell division cycle 6 [Source:HGNC Symbol;Acc:HGNC:1744]	1640	1837	1878	1659
ENSG00000094841	UPRT	3689	X	75156388	75304885	uracil phosphoribosyltransferase homolog [Source:HGNC Symbol;Acc:HGNC:28334]	155	216	232	253
ENSG00000094880	CDC23	4616	5	138187650	138213343	cell division cycle 23 [Source:HGNC Symbol;Acc:HGNC:1724]	1645	1897	1903	1481
ENSG00000094914	AAAS	4727	12	53307456	53324864	aladin WD repeat nucleoporin [Source:HGNC Symbol;Acc:HGNC:13666]	929	850	1213	1154
ENSG00000094916	CBX5	15038	12	54230942	54280133	chromobox 5 [Source:HGNC Symbol;Acc:HGNC:1555]	9574	8363	12801	12529
ENSG00000094963	FMO2	6201	1	171185249	171212686	flavin containing dimethylaniline monoxygenase 2 [Source:HGNC Symbol;Acc:HGNC:3770]	18	27	14	22
ENSG00000094975	SUCO	7893	1	172532349	172611833	SUN domain containing ossification factor [Source:HGNC Symbol;Acc:HGNC:1240]	4355	4287	3710	3552
ENSG00000095002	MSH2	13674	2	47403067	47663146	mutS homolog 2 [Source:HGNC Symbol;Acc:HGNC:7325]	4123	4218	5319	4913
ENSG00000095015	MAP3K1	7741	5	56815549	56896152	mitogen-activated protein kinase kinase kinase 1 [Source:HGNC Symbol;Acc:HGNC:6848]	1554	1742	1513	1551
ENSG00000095059	DHPS	2984	19	12675717	12681880	deoxyhypusine synthase [Source:HGNC Symbol;Acc:HGNC:2869]	98	154	197	194
ENSG00000095066	HOOK2	5950	19	12763003	12872740	hook microtubule tethering protein 2 [Source:HGNC Symbol;Acc:HGNC:19885]	4130	3701	3765	4141
ENSG00000095139	ARCN1	4177	11	118572390	118603033	archain 1 [Source:HGNC Symbol;Acc:HGNC:649]	10997	11066	10442	9960
ENSG00000095203	EPB41L4B	7975	9	109171974	109321059	erythrocyte membrane protein band 4.1 like 4B [Source:HGNC Symbol;Acc:HGNC:19818]	1696	1743	2580	2186
ENSG00000095209	TMEM38B	4531	9	105694541	105776629	transmembrane protein 38B [Source:HGNC Symbol;Acc:HGNC:25535]	664	838	1192	1076
ENSG00000095261	PSMD5	4399	9	120815496	120842951	proteasome 26S subunit, non-ATPase 5 [Source:HGNC Symbol;Acc:HGNC:9563]	1574	1972	1787	1694
ENSG00000095303	PTGS1	5784	9	122370530	122395703	prostaglandin-endoperoxide synthase 1 [Source:HGNC Symbol;Acc:HGNC:9604]	59	70	121	167
ENSG00000095319	NUP188	8041	9	128947699	129007096	nucleoporin 188 [Source:HGNC Symbol;Acc:HGNC:17859]	5819	5207	4633	4522
ENSG00000095321	CRAT	7565	9	129094142	129111189	carnitine O-acetyltransferase [Source:HGNC Symbol;Acc:HGNC:2342]	3264	2683	3081	2898
ENSG00000095370	SH2D3C	4628	9	127738317	127778710	SH2 domain containing 3C [Source:HGNC Symbol;Acc:HGNC:16884]	8	4	4	4
ENSG00000095380	NANS	4931	9	98056732	98083077	N-acetylneuraminate synthase [Source:HGNC Symbol;Acc:HGNC:19237]	1463	1592	1274	1358
ENSG00000095383	TBC1D2	3597	9	98199011	98255649	TBC1 domain family member 2 [Source:HGNC Symbol;Acc:HGNC:18026]	1951	1749	1534	1465
ENSG00000095397	WHRN	6362	9	114402080	114505473	whirlin [Source:HGNC Symbol;Acc:HGNC:16361]	330	285	372	273
ENSG00000095464	PDE6C	3361	10	93612537	93666010	phosphodiesterase 6C [Source:HGNC Symbol;Acc:HGNC:8787]	11	7	9	8
ENSG00000095485	CWF19L1	3985	10	100232298	100267680	CWF19 like cell cycle control factor 1 [Source:HGNC Symbol;Acc:HGNC:25613]	832	892	1235	1178
ENSG00000095539	SEMA4G	5298	10	100969504	100985871	semaphorin 4G [Source:HGNC Symbol;Acc:HGNC:10735]	64	54	60	83
ENSG00000095564	BTAF1	8679	10	91923770	92031437	B-TFIID TATA-box binding protein associated factor 1 [Source:HGNC Symbol;Acc:HGNC:17307]	3570	3996	3271	2951
ENSG00000095574	IKZF5	4928	10	122990807	123008812	IKAROS family zinc finger 5 [Source:HGNC Symbol;Acc:HGNC:14283]	475	460	489	553
ENSG00000095585	BLNK	10554	10	96189171	96271587	B cell linker [Source:HGNC Symbol;Acc:HGNC:14211]	321	304	124	145
ENSG00000095587	TLL2	8157	10	96364608	96513926	tolloid like 2 [Source:HGNC Symbol;Acc:HGNC:11844]	6	0	0	2
ENSG00000095596	CYP26A1	2964	10	93073475	93077885	cytochrome P450 family 26 subfamily A member 1 [Source:HGNC Symbol;Acc:HGNC:2603]	0	0	1	0
ENSG00000095627	TDRD1	8686	10	114179270	114232666	tudor domain containing 1 [Source:HGNC Symbol;Acc:HGNC:11712]	0	0	0	0
ENSG00000095637	SORBS1	11052	10	95311771	95561414	sorbin and SH3 domain containing 1 [Source:HGNC Symbol;Acc:HGNC:14565]	1436	1577	1004	1012
ENSG00000095713	CRTAC1	3553	10	97865000	98030828	cartilage acidic protein 1 [Source:HGNC Symbol;Acc:HGNC:14882]	0	0	0	0
ENSG00000095739	BAMBI	2139	10	28677510	28682932	BMP and activin membrane bound inhibitor [Source:HGNC Symbol;Acc:HGNC:30251]	1301	1566	1106	933
ENSG00000095752	IL11	2678	19	55364382	55370463	interleukin 11 [Source:HGNC Symbol;Acc:HGNC:5966]	43	39	38	38
ENSG00000095787	WAC	12903	10	28532493	28623112	WW domain containing adaptor with coiled-coil [Source:HGNC Symbol;Acc:HGNC:17327]	6639	6475	6313	6135
ENSG00000095794	CREM	5699	10	35126791	35212958	cAMP responsive element modulator [Source:HGNC Symbol;Acc:HGNC:2352]	388	408	498	480
ENSG00000095906	NUBP2	4947	16	1782932	1789186	NUBP iron-sulfur cluster assembly factor 2, cytosolic [Source:HGNC Symbol;Acc:HGNC:8042]	2150	2084	2048	2077
ENSG00000095932	SMIM24	1481	19	3473986	3480525	small integral membrane protein 24 [Source:HGNC Symbol;Acc:HGNC:37244]	0	0	0	2
ENSG00000095951	HIVEP1	11005	6	12008762	12164999	HIVEP zinc finger 1 [Source:HGNC Symbol;Acc:HGNC:4920]	4201	3714	4302	3897
ENSG00000096006	CRISP3	2255	6	49727376	49744437	cysteine rich secretory protein 3 [Source:HGNC Symbol;Acc:HGNC:16904]	1295	1380	1321	1320
ENSG00000096060	FKBP5	10628	6	35573585	35728583	FKBP prolyl isomerase 5 [Source:HGNC Symbol;Acc:HGNC:3721]	2015	2013	2039	1953
ENSG00000096063	SRPK1	6692	6	35832966	35921342	SRSF protein kinase 1 [Source:HGNC Symbol;Acc:HGNC:11305]	4165	4260	5414	5337
ENSG00000096070	BRPF3	6613	6	36196744	36232790	bromodomain and PHD finger containing 3 [Source:HGNC Symbol;Acc:HGNC:14256]	6716	5489	6262	6566
ENSG00000096080	MRPS18A	1385	6	43671202	43687791	mitochondrial ribosomal protein S18A [Source:HGNC Symbol;Acc:HGNC:14515]	757	734	680	759
ENSG00000096088	PGC	2025	6	41736711	41754109	progastricsin [Source:HGNC Symbol;Acc:HGNC:8890]	8	5	14	10
ENSG00000096092	TMEM14A	988	6	52671113	52686588	transmembrane protein 14A [Source:HGNC Symbol;Acc:HGNC:21076]	657	1076	755	716
ENSG00000096093	EFHC1	22744	6	52362123	52529886	EF-hand domain containing 1 [Source:HGNC Symbol;Acc:HGNC:16406]	367	443	544	493
ENSG00000096264	NCR2	1268	6	41335608	41350889	natural cytotoxicity triggering receptor 2 [Source:HGNC Symbol;Acc:HGNC:6732]	0	0	0	0
ENSG00000096384	HSP90AB1	2980	6	44246166	44253888	heat shock protein 90 alpha family class B member 1 [Source:HGNC Symbol;Acc:HGNC:5258]	55579	50855	68927	68428
ENSG00000096395	MLN	558	6	33794673	33804003	motilin [Source:HGNC Symbol;Acc:HGNC:7141]	1	0	0	3
ENSG00000096401	CDC5L	6241	6	44387706	44450425	cell division cycle 5 like [Source:HGNC Symbol;Acc:HGNC:1743]	3654	3833	3760	3943
ENSG00000096433	ITPR3	9870	6	33620365	33696574	inositol 1,4,5-trisphosphate receptor type 3 [Source:HGNC Symbol;Acc:HGNC:6182]	20688	17590	18149	16834
ENSG00000096654	ZNF184	3366	6	27450743	27473118	zinc finger protein 184 [Source:HGNC Symbol;Acc:HGNC:12975]	558	586	452	557
ENSG00000096696	DSP	13619	6	7541338	7586714	desmoplakin [Source:HGNC Symbol;Acc:HGNC:3052]	36434	29267	47782	45243
ENSG00000096717	SIRT1	4564	10	67884656	67918390	sirtuin 1 [Source:HGNC Symbol;Acc:HGNC:14929]	1482	1704	1889	2064
ENSG00000096746	HNRNPH3	5375	10	68331174	68343193	heterogeneous nuclear ribonucleoprotein H3 [Source:HGNC Symbol;Acc:HGNC:5043]	4533	5437	5094	5140
ENSG00000096872	IFT74	7277	9	26947039	27066134	intraflagellar transport 74 [Source:HGNC Symbol;Acc:HGNC:21424]	430	428	537	555
ENSG00000096968	JAK2	7908	9	4984390	5129948	Janus kinase 2 [Source:HGNC Symbol;Acc:HGNC:6192]	465	632	803	820
ENSG00000096996	IL12RB1	4291	19	18058995	18098944	interleukin 12 receptor subunit beta 1 [Source:HGNC Symbol;Acc:HGNC:5971]	2	3	4	0
ENSG00000097007	ABL1	6991	9	130713043	130887675	ABL proto-oncogene 1, non-receptor tyrosine kinase [Source:HGNC Symbol;Acc:HGNC:76]	2536	2372	3152	3084
ENSG00000097021	ACOT7	3500	1	6264269	6393767	acyl-CoA thioesterase 7 [Source:HGNC Symbol;Acc:HGNC:24157]	1547	1484	1906	1755
ENSG00000097033	SH3GLB1	6881	1	86704570	86748184	SH3 domain containing GRB2 like, endophilin B1 [Source:HGNC Symbol;Acc:HGNC:10833]	6537	6384	5494	5096
ENSG00000097046	CDC7	3599	1	91500851	91525764	cell division cycle 7 [Source:HGNC Symbol;Acc:HGNC:1745]	824	1104	1326	1345
ENSG00000097096	SYDE2	7113	1	85156889	85201724	synapse defective Rho GTPase homolog 2 [Source:HGNC Symbol;Acc:HGNC:25841]	1143	1387	1411	1516
ENSG00000099139	PCSK5	13341	9	75890644	76362975	proprotein convertase subtilisin/kexin type 5 [Source:HGNC Symbol;Acc:HGNC:8747]	2	0	0	0
ENSG00000099194	SCD	5245	10	100347233	100364826	stearoyl-CoA desaturase [Source:HGNC Symbol;Acc:HGNC:10571]	9386	8543	10418	10192
ENSG00000099203	TMED1	1884	19	10832067	10836318	transmembrane p24 trafficking protein 1 [Source:HGNC Symbol;Acc:HGNC:17291]	325	369	407	357
ENSG00000099204	ABLIM1	10209	10	114431112	114768061	actin binding LIM protein 1 [Source:HGNC Symbol;Acc:HGNC:78]	14570	12003	10200	10675
ENSG00000099219	ERMP1	15257	9	5749832	5879537	endoplasmic reticulum metallopeptidase 1 [Source:HGNC Symbol;Acc:HGNC:23703]	5343	5106	4760	4881
ENSG00000099246	RAB18	14362	10	27504174	27543207	RAB18, member RAS oncogene family [Source:HGNC Symbol;Acc:HGNC:14244]	2067	2407	2302	2173
ENSG00000099250	NRP1	11522	10	33177492	33336262	neuropilin 1 [Source:HGNC Symbol;Acc:HGNC:8004]	2352	2244	3850	3941
ENSG00000099256	PRTFDC1	2324	10	24848614	24952606	phosphoribosyl transferase domain containing 1 [Source:HGNC Symbol;Acc:HGNC:23333]	4	7	12	0
ENSG00000099260	PALMD	8074	1	99646113	99694541	palmdelphin [Source:HGNC Symbol;Acc:HGNC:15846]	545	480	634	587
ENSG00000099282	TSPAN15	2651	10	69451465	69507666	tetraspanin 15 [Source:HGNC Symbol;Acc:HGNC:23298]	2447	2593	2267	2052
ENSG00000099284	MACROH2A2	14988	10	70052544	70112282	macroH2A.2 histone [Source:HGNC Symbol;Acc:HGNC:14453]	816	669	729	736
ENSG00000099290	WASHC2A	5162	10	50067888	50133509	WASH complex subunit 2A [Source:HGNC Symbol;Acc:HGNC:23416]	2812	2562	3448	3354
ENSG00000099308	MAST3	7249	19	18097778	18151692	microtubule associated serine/threonine kinase 3 [Source:HGNC Symbol;Acc:HGNC:19036]	1193	958	1339	1430
ENSG00000099326	MZF1	6654	19	58561931	58573575	myeloid zinc finger 1 [Source:HGNC Symbol;Acc:HGNC:13108]	984	1062	1639	2048
ENSG00000099330	OCEL1	1858	19	17226213	17229219	occludin/ELL domain containing 1 [Source:HGNC Symbol;Acc:HGNC:26221]	427	316	192	160
ENSG00000099331	MYO9B	9952	19	17075777	17214537	myosin IXB [Source:HGNC Symbol;Acc:HGNC:7609]	10556	9317	8069	8453
ENSG00000099337	KCNK6	6168	19	38319845	38332076	potassium two pore domain channel subfamily K member 6 [Source:HGNC Symbol;Acc:HGNC:6281]	246	228	545	626
ENSG00000099338	CATSPERG	9190	19	38335775	38370943	cation channel sperm associated auxiliary subunit gamma [Source:HGNC Symbol;Acc:HGNC:25243]	43	62	60	60
ENSG00000099341	PSMD8	4313	19	38374563	38383850	proteasome 26S subunit, non-ATPase 8 [Source:HGNC Symbol;Acc:HGNC:9566]	10728	9788	9839	8991
ENSG00000099364	FBXL19	4865	16	30923055	30948783	F-box and leucine rich repeat protein 19 [Source:HGNC Symbol;Acc:HGNC:25300]	2436	2484	2947	3063
ENSG00000099365	STX1B	5206	16	30989256	31010638	syntaxin 1B [Source:HGNC Symbol;Acc:HGNC:18539]	5	22	10	16
ENSG00000099377	HSD3B7	2490	16	30985207	30989147	hydroxy-delta-5-steroid dehydrogenase, 3 beta- and steroid delta-isomerase 7 [Source:HGNC Symbol;Acc:HGNC:18324]	96	96	77	72
ENSG00000099381	SETD1A	6986	16	30957294	30984664	SET domain containing 1A, histone lysine methyltransferase [Source:HGNC Symbol;Acc:HGNC:29010]	2504	1938	2461	2384
ENSG00000099385	BCL7C	3740	16	30833626	30894302	BAF chromatin remodeling complex subunit BCL7C [Source:HGNC Symbol;Acc:HGNC:1006]	352	399	355	384
ENSG00000099399	MAGEB2	1607	X	30215563	30220089	MAGE family member B2 [Source:HGNC Symbol;Acc:HGNC:6809]	43	55	35	20
ENSG00000099617	EFNA2	2424	19	1285873	1301431	ephrin A2 [Source:HGNC Symbol;Acc:HGNC:3222]	20	24	11	13
ENSG00000099622	CIRBP	6368	19	1259384	1274880	cold inducible RNA binding protein [Source:HGNC Symbol;Acc:HGNC:1982]	1863	2525	2076	2058
ENSG00000099624	ATP5F1D	2249	19	1241746	1244825	ATP synthase F1 subunit delta [Source:HGNC Symbol;Acc:HGNC:837]	1841	1896	1951	1627
ENSG00000099625	CBARP	4591	19	1228287	1238027	CACN subunit beta associated regulatory protein [Source:HGNC Symbol;Acc:HGNC:28617]	187	136	206	164
ENSG00000099715	PCDH11Y	11804	Y	5000226	5742224	protocadherin 11 Y-linked [Source:HGNC Symbol;Acc:HGNC:15813]	0	0	0	0
ENSG00000099725	PRKY	7674	Y	7273972	7381548	protein kinase Y-linked (pseudogene) [Source:HGNC Symbol;Acc:HGNC:9444]	3	0	0	0
ENSG00000099769	IGFALS	2332	16	1790413	1794971	insulin like growth factor binding protein acid labile subunit [Source:HGNC Symbol;Acc:HGNC:5468]	19	21	6	42
ENSG00000099783	HNRNPM	5606	19	8444767	8489114	heterogeneous nuclear ribonucleoprotein M [Source:HGNC Symbol;Acc:HGNC:5046]	13217	13344	14153	14154
ENSG00000099785	MARCHF2	2216	19	8413270	8439017	membrane associated ring-CH-type finger 2 [Source:HGNC Symbol;Acc:HGNC:28038]	718	677	644	512
ENSG00000099795	NDUFB7	535	19	14566078	14572066	NADH:ubiquinone oxidoreductase subunit B7 [Source:HGNC Symbol;Acc:HGNC:7702]	3089	2495	2547	2176
ENSG00000099797	TECR	5899	19	14517085	14565980	trans-2,3-enoyl-CoA reductase [Source:HGNC Symbol;Acc:HGNC:4551]	8006	7465	7916	7539
ENSG00000099800	TIMM13	1664	19	2425625	2427586	translocase of inner mitochondrial membrane 13 [Source:HGNC Symbol;Acc:HGNC:11816]	1066	1415	1118	1054
ENSG00000099804	CDC34	1894	19	531760	542092	cell division cycle 34, ubiqiutin conjugating enzyme [Source:HGNC Symbol;Acc:HGNC:1734]	2828	2845	2282	2118
ENSG00000099810	MTAP	14527	9	21802636	21937651	methylthioadenosine phosphorylase [Source:HGNC Symbol;Acc:HGNC:7413]	1398	1888	1510	1460
ENSG00000099812	MISP	2980	19	751112	764318	mitotic spindle positioning [Source:HGNC Symbol;Acc:HGNC:27000]	1	2	0	2
ENSG00000099814	CEP170B	7183	14	104865268	104896747	centrosomal protein 170B [Source:HGNC Symbol;Acc:HGNC:20362]	10906	8456	8698	8612
ENSG00000099817	POLR2E	4870	19	1086574	1095380	RNA polymerase II, I and III subunit E [Source:HGNC Symbol;Acc:HGNC:9192]	5257	4701	4324	3930
ENSG00000099821	POLRMT	5060	19	617221	633537	RNA polymerase mitochondrial [Source:HGNC Symbol;Acc:HGNC:9200]	2940	2351	2713	2722
ENSG00000099822	HCN2	3420	19	589881	617159	hyperpolarization activated cyclic nucleotide gated potassium and sodium channel 2 [Source:HGNC Symbol;Acc:HGNC:4846]	50	52	69	46
ENSG00000099834	CDHR5	3861	11	616577	626078	cadherin related family member 5 [Source:HGNC Symbol;Acc:HGNC:7521]	10	4	6	31
ENSG00000099840	IZUMO4	2770	19	2096429	2099593	IZUMO family member 4 [Source:HGNC Symbol;Acc:HGNC:26950]	18	10	24	11
ENSG00000099849	RASSF7	2514	11	560404	564025	Ras association domain family member 7 [Source:HGNC Symbol;Acc:HGNC:1166]	1734	1712	1699	1371
ENSG00000099860	GADD45B	2138	19	2476122	2478259	growth arrest and DNA damage inducible beta [Source:HGNC Symbol;Acc:HGNC:4096]	1155	1400	817	751
ENSG00000099864	PALM	4912	19	708935	748329	paralemmin [Source:HGNC Symbol;Acc:HGNC:8594]	391	332	403	446
ENSG00000099866	MADCAM1	2453	19	489176	505343	mucosal vascular addressin cell adhesion molecule 1 [Source:HGNC Symbol;Acc:HGNC:6765]	17	7	24	20
ENSG00000099875	MKNK2	5221	19	2037465	2051244	MAPK interacting serine/threonine kinase 2 [Source:HGNC Symbol;Acc:HGNC:7111]	4630	4466	2295	2230
ENSG00000099889	ARVCF	5636	22	19969896	20016823	ARVCF delta catenin family member [Source:HGNC Symbol;Acc:HGNC:728]	3253	3107	2789	2673
ENSG00000099899	TRMT2A	3954	22	20111875	20117392	tRNA methyltransferase 2 homolog A [Source:HGNC Symbol;Acc:HGNC:24974]	1902	1888	1793	1991
ENSG00000099901	RANBP1	4620	22	20115938	20127355	RAN binding protein 1 [Source:HGNC Symbol;Acc:HGNC:9847]	3167	4244	4406	4492
ENSG00000099904	ZDHHC8	5545	22	20129456	20148007	zinc finger DHHC-type palmitoyltransferase 8 [Source:HGNC Symbol;Acc:HGNC:18474]	2100	2266	2236	2090
ENSG00000099910	KLHL22	4607	22	20441519	20495844	kelch like family member 22 [Source:HGNC Symbol;Acc:HGNC:25888]	1450	1278	1178	1245
ENSG00000099917	MED15	10374	22	20495913	20587632	mediator complex subunit 15 [Source:HGNC Symbol;Acc:HGNC:14248]	8099	6423	5790	6129
ENSG00000099937	SERPIND1	2319	22	20774113	20787720	serpin family D member 1 [Source:HGNC Symbol;Acc:HGNC:4838]	0	0	0	0
ENSG00000099940	SNAP29	4925	22	20859007	20891214	synaptosome associated protein 29 [Source:HGNC Symbol;Acc:HGNC:11133]	2487	2514	2227	2390
ENSG00000099942	CRKL	5342	22	20917407	20953747	CRK like proto-oncogene, adaptor protein [Source:HGNC Symbol;Acc:HGNC:2363]	4751	4897	5419	4878
ENSG00000099949	LZTR1	8673	22	20982269	20999032	leucine zipper like transcription regulator 1 [Source:HGNC Symbol;Acc:HGNC:6742]	591	557	508	517
ENSG00000099953	MMP11	5149	22	23768226	23784316	matrix metallopeptidase 11 [Source:HGNC Symbol;Acc:HGNC:7157]	10	7	4	6
ENSG00000099954	CECR2	10667	22	17359949	17558151	CECR2 histone acetyl-lysine reader [Source:HGNC Symbol;Acc:HGNC:1840]	32	18	37	37
ENSG00000099956	SMARCB1	16526	22	23786931	23838009	SWI/SNF related, matrix associated, actin dependent regulator of chromatin, subfamily b, member 1 [Source:HGNC Symbol;Acc:HGNC:11103]	1351	1555	4205	3651
ENSG00000099957	P2RX6	3787	22	21009808	21028013	purinergic receptor P2X 6 [Source:HGNC Symbol;Acc:HGNC:8538]	4	0	2	4
ENSG00000099958	DERL3	3796	22	23834503	23839128	derlin 3 [Source:HGNC Symbol;Acc:HGNC:14236]	16	5	4	0
ENSG00000099968	BCL2L13	7662	22	17628855	17730855	BCL2 like 13 [Source:HGNC Symbol;Acc:HGNC:17164]	4182	3664	3137	3308
ENSG00000099974	DDTL	1582	22	23966888	23972556	D-dopachrome tautomerase like [Source:HGNC Symbol;Acc:HGNC:33446]	5	5	3	2
ENSG00000099977	DDT	3996	22	23970542	23980525	D-dopachrome tautomerase [Source:HGNC Symbol;Acc:HGNC:2732]	51	48	38	32
ENSG00000099984	GSTT2	1184	22	23980058	23983915	glutathione S-transferase theta 2 (gene/pseudogene) [Source:HGNC Symbol;Acc:HGNC:4642]	0	4	7	2
ENSG00000099985	OSM	2125	22	30262829	30266851	oncostatin M [Source:HGNC Symbol;Acc:HGNC:8506]	0	0	0	2
ENSG00000099991	CABIN1	9388	22	24011192	24178628	calcineurin binding protein 1 [Source:HGNC Symbol;Acc:HGNC:24187]	4667	3714	3770	3575
ENSG00000099992	TBC1D10A	6948	22	30291990	30326947	TBC1 domain family member 10A [Source:HGNC Symbol;Acc:HGNC:23609]	650	599	635	546
ENSG00000099994	SUSD2	5047	22	24181487	24189106	sushi domain containing 2 [Source:HGNC Symbol;Acc:HGNC:30667]	4140	3818	6821	6440
ENSG00000099995	SF3A1	6301	22	30331988	30356919	splicing factor 3a subunit 1 [Source:HGNC Symbol;Acc:HGNC:10765]	9217	8233	9404	9065
ENSG00000099998	GGT5	6020	22	24219654	24245108	gamma-glutamyltransferase 5 [Source:HGNC Symbol;Acc:HGNC:4260]	280	382	744	724
ENSG00000099999	RNF215	10643	22	30368811	30421771	ring finger protein 215 [Source:HGNC Symbol;Acc:HGNC:33434]	556	513	707	749
[truncated: 31,986 more rows]

## Sheet: 468 KD-CtBP+RSL3 vs CTRL+RSL3 
Geneid	external_gene_name	Length	chromosome_name	start_position	end_position	description	KD-ctbp_RSL_2	KD-ctbp_RSL_1	Ctrl_RSL_1	Ctrl_RSL_2
ENSG00000000003	TSPAN6	4530	X	100627108	100639991	tetraspanin 6 [Source:HGNC Symbol;Acc:HGNC:11858]	2177	2031	1646	2108
ENSG00000000005	TNMD	1476	X	100584936	100599885	tenomodulin [Source:HGNC Symbol;Acc:HGNC:17757]	6	0	0	0
ENSG00000000419	DPM1	9276	20	50934867	50959140	dolichyl-phosphate mannosyltransferase subunit 1, catalytic [Source:HGNC Symbol;Acc:HGNC:3005]	1974	1904	2761	2559
ENSG00000000457	SCYL3	6883	1	169849631	169894267	SCY1 like pseudokinase 3 [Source:HGNC Symbol;Acc:HGNC:19285]	482	585	606	499
ENSG00000000460	C1orf112	5970	1	169662007	169854080	chromosome 1 open reading frame 112 [Source:HGNC Symbol;Acc:HGNC:25565]	1550	1536	957	1132
ENSG00000000938	FGR	3382	1	27612064	27635185	FGR proto-oncogene, Src family tyrosine kinase [Source:HGNC Symbol;Acc:HGNC:3697]	1	0	0	0
ENSG00000000971	CFH	15284	1	196651754	196752476	complement factor H [Source:HGNC Symbol;Acc:HGNC:4883]	0	0	0	0
ENSG00000001036	FUCA2	2822	6	143494812	143511720	alpha-L-fucosidase 2 [Source:HGNC Symbol;Acc:HGNC:4008]	2378	2139	2204	2614
ENSG00000001084	GCLC	8618	6	53497341	53616970	glutamate-cysteine ligase catalytic subunit [Source:HGNC Symbol;Acc:HGNC:4311]	5759	5785	12855	13048
ENSG00000001167	NFYA	6209	6	41072974	41102403	nuclear transcription factor Y subunit alpha [Source:HGNC Symbol;Acc:HGNC:7804]	963	1014	1033	984
ENSG00000001460	STPG1	8511	1	24356999	24416934	sperm tail PG-rich repeat containing 1 [Source:HGNC Symbol;Acc:HGNC:28070]	800	612	353	580
ENSG00000001461	NIPAL3	9396	1	24415802	24472976	NIPA like domain containing 3 [Source:HGNC Symbol;Acc:HGNC:25233]	2185	2062	1438	1715
ENSG00000001497	LAS1L	12555	X	65438549	65534810	LAS1 like ribosome biogenesis factor [Source:HGNC Symbol;Acc:HGNC:25726]	3510	3386	3302	3925
ENSG00000001561	ENPP4	4644	6	46129989	46146688	ectonucleotide pyrophosphatase/phosphodiesterase 4 [Source:HGNC Symbol;Acc:HGNC:3359]	1565	1525	1296	1173
ENSG00000001617	SEMA3F	4826	3	50155045	50189075	semaphorin 3F [Source:HGNC Symbol;Acc:HGNC:10728]	4279	4381	3415	4177
ENSG00000001629	ANKIB1	7389	7	92245974	92401383	ankyrin repeat and IBR domain containing 1 [Source:HGNC Symbol;Acc:HGNC:22215]	2851	2874	3210	2764
ENSG00000001630	CYP51A1	4171	7	92084987	92134803	cytochrome P450 family 51 subfamily A member 1 [Source:HGNC Symbol;Acc:HGNC:2649]	352	322	537	298
ENSG00000001631	KRIT1	21110	7	92197498	92246166	KRIT1 ankyrin repeat containing [Source:HGNC Symbol;Acc:HGNC:1573]	152	108	151	87
ENSG00000002016	RAD52	4503	12	911736	990053	RAD52 homolog, DNA repair protein [Source:HGNC Symbol;Acc:HGNC:9824]	176	168	206	119
ENSG00000002079	MYH16	6307	7	99238829	99311130	myosin heavy chain 16 pseudogene [Source:HGNC Symbol;Acc:HGNC:31038]	9	10	7	24
ENSG00000002330	BAD	1708	11	64269830	64284704	BCL2 associated agonist of cell death [Source:HGNC Symbol;Acc:HGNC:936]	586	484	657	817
ENSG00000002549	LAP3	3779	4	17577198	17607972	leucine aminopeptidase 3 [Source:HGNC Symbol;Acc:HGNC:18449]	2377	2473	2490	2617
ENSG00000002586	CD99	4858	X	2691187	2741309	CD99 molecule (Xg blood group) [Source:HGNC Symbol;Acc:HGNC:7082]	3155	3034	2879	3420
ENSG00000002587	HS3ST1	7435	4	11393150	11429564	heparan sulfate-glucosamine 3-sulfotransferase 1 [Source:HGNC Symbol;Acc:HGNC:5194]	167	191	145	224
ENSG00000002745	WNT16	3264	7	121325367	121341104	Wnt family member 16 [Source:HGNC Symbol;Acc:HGNC:16267]	0	0	0	0
ENSG00000002746	HECW1	13935	7	43112629	43566001	HECT, C2 and WW domain containing E3 ubiquitin protein ligase 1 [Source:HGNC Symbol;Acc:HGNC:22195]	0	0	0	0
ENSG00000002822	MAD1L1	6955	7	1815793	2233243	mitotic arrest deficient 1 like 1 [Source:HGNC Symbol;Acc:HGNC:6762]	16	18	19	4
ENSG00000002834	LASP1	7061	17	38869859	38921770	LIM and SH3 protein 1 [Source:HGNC Symbol;Acc:HGNC:6513]	12144	11831	8394	10493
ENSG00000002919	SNX11	4133	17	48103357	48123601	sorting nexin 11 [Source:HGNC Symbol;Acc:HGNC:14975]	548	588	853	946
ENSG00000003056	M6PR	3585	12	8940361	8949761	mannose-6-phosphate receptor, cation dependent [Source:HGNC Symbol;Acc:HGNC:6752]	1706	1646	1878	1727
ENSG00000003096	KLHL13	6928	X	117897813	118117340	kelch like family member 13 [Source:HGNC Symbol;Acc:HGNC:22931]	10	9	0	2
ENSG00000003137	CYP26B1	4839	2	72129238	72147862	cytochrome P450 family 26 subfamily B member 1 [Source:HGNC Symbol;Acc:HGNC:20581]	509	377	625	547
ENSG00000003147	ICA1	4883	7	8113184	8262687	islet cell autoantigen 1 [Source:HGNC Symbol;Acc:HGNC:5343]	1195	1136	1721	1849
ENSG00000003249	DBNDD1	4462	16	90004871	90019890	dysbindin domain containing 1 [Source:HGNC Symbol;Acc:HGNC:28455]	1897	1945	2334	2618
ENSG00000003393	ALS2	33513	2	201700267	201782112	alsin Rho guanine nucleotide exchange factor ALS2 [Source:HGNC Symbol;Acc:HGNC:443]	806	761	1007	855
ENSG00000003400	CASP10	8920	2	201182872	201229428	caspase 10 [Source:HGNC Symbol;Acc:HGNC:1500]	1210	1200	854	651
ENSG00000003402	CFLAR	22478	2	201116154	201176687	CASP8 and FADD like apoptosis regulator [Source:HGNC Symbol;Acc:HGNC:1876]	2129	2049	1431	1310
ENSG00000003436	TFPI	11714	2	187464230	187565760	tissue factor pathway inhibitor [Source:HGNC Symbol;Acc:HGNC:11760]	5229	4569	2435	2347
ENSG00000003509	NDUFAF7	3651	2	37231631	37253403	NADH:ubiquinone oxidoreductase complex assembly factor 7 [Source:HGNC Symbol;Acc:HGNC:28816]	445	524	592	588
ENSG00000003756	RBM5	10357	3	50088919	50119021	RNA binding motif protein 5 [Source:HGNC Symbol;Acc:HGNC:9902]	733	702	1015	729
ENSG00000003987	MTMR7	6928	8	17296794	17413528	myotubularin related protein 7 [Source:HGNC Symbol;Acc:HGNC:7454]	22	68	31	27
ENSG00000003989	SLC7A2	7905	8	17497088	17570573	solute carrier family 7 member 2 [Source:HGNC Symbol;Acc:HGNC:11060]	30	17	24	22
ENSG00000004059	ARF5	1825	7	127588386	127591700	ADP ribosylation factor 5 [Source:HGNC Symbol;Acc:HGNC:658]	2195	2272	2936	3988
ENSG00000004139	SARM1	11105	17	28364356	28404049	sterile alpha and TIR motif containing 1 [Source:HGNC Symbol;Acc:HGNC:17074]	180	201	160	173
ENSG00000004142	POLDIP2	2670	17	28346633	28357527	DNA polymerase delta interacting protein 2 [Source:HGNC Symbol;Acc:HGNC:23781]	4528	4474	3847	5089
ENSG00000004399	PLXND1	9557	3	129555214	129606676	plexin D1 [Source:HGNC Symbol;Acc:HGNC:9107]	867	893	2375	2108
ENSG00000004455	AK2	17967	1	33007986	33080996	adenylate kinase 2 [Source:HGNC Symbol;Acc:HGNC:362]	7176	7063	7409	7440
ENSG00000004468	CD38	6857	4	15778275	15853232	CD38 molecule [Source:HGNC Symbol;Acc:HGNC:1667]	44	34	14	4
ENSG00000004478	FKBP4	5163	12	2794970	2805423	FKBP prolyl isomerase 4 [Source:HGNC Symbol;Acc:HGNC:3720]	4469	4048	4561	5991
ENSG00000004487	KDM1A	18325	1	23019443	23083689	lysine demethylase 1A [Source:HGNC Symbol;Acc:HGNC:29079]	8167	8264	7143	9049
ENSG00000004534	RBM6	7299	3	49940007	50100045	RNA binding motif protein 6 [Source:HGNC Symbol;Acc:HGNC:9903]	1243	1395	2222	1510
ENSG00000004660	CAMKK1	7433	17	3860315	3894891	calcium/calmodulin dependent protein kinase kinase 1 [Source:HGNC Symbol;Acc:HGNC:1469]	66	54	116	117
ENSG00000004700	RECQL	3779	12	21468910	21501669	RecQ like helicase [Source:HGNC Symbol;Acc:HGNC:9948]	1066	1186	908	884
ENSG00000004766	VPS50	9559	7	93232340	93361123	VPS50 subunit of EARP/GARPII complex [Source:HGNC Symbol;Acc:HGNC:25956]	678	671	619	790
ENSG00000004776	HSPB6	1724	19	35754566	35758079	heat shock protein family B (small) member 6 [Source:HGNC Symbol;Acc:HGNC:26511]	5	0	9	3
ENSG00000004777	ARHGAP33	5260	19	35774532	35788822	Rho GTPase activating protein 33 [Source:HGNC Symbol;Acc:HGNC:23085]	344	367	686	456
ENSG00000004779	NDUFAB1	1548	16	23581014	23596316	NADH:ubiquinone oxidoreductase subunit AB1 [Source:HGNC Symbol;Acc:HGNC:7694]	1078	852	1612	1563
ENSG00000004799	PDK4	4544	7	95583499	95596516	pyruvate dehydrogenase kinase 4 [Source:HGNC Symbol;Acc:HGNC:8812]	281	197	40	107
ENSG00000004809	SLC22A16	3907	6	110424687	110476641	solute carrier family 22 member 16 [Source:HGNC Symbol;Acc:HGNC:20302]	2	4	0	0
ENSG00000004838	ZMYND10	2889	3	50341110	50345732	zinc finger MYND-type containing 10 [Source:HGNC Symbol;Acc:HGNC:19412]	9	11	46	30
ENSG00000004846	ABCB5	8796	7	20615667	20777038	ATP binding cassette subfamily B member 5 [Source:HGNC Symbol;Acc:HGNC:46]	1	0	0	0
ENSG00000004848	ARX	3114	X	25003694	25016420	aristaless related homeobox [Source:HGNC Symbol;Acc:HGNC:18060]	9	12	6	14
ENSG00000004864	SLC25A13	3710	7	96120220	96322147	solute carrier family 25 member 13 [Source:HGNC Symbol;Acc:HGNC:10983]	3510	3457	2363	2852
ENSG00000004866	ST7	6526	7	116953238	117230176	suppression of tumorigenicity 7 [Source:HGNC Symbol;Acc:HGNC:11351]	772	866	640	861
ENSG00000004897	CDC27	6824	17	47117703	47189422	cell division cycle 27 [Source:HGNC Symbol;Acc:HGNC:1728]	2595	2485	1831	1545
ENSG00000004961	HCCS	2343	X	11111301	11123086	holocytochrome c synthase [Source:HGNC Symbol;Acc:HGNC:4837]	2243	2158	2138	2255
ENSG00000004975	DVL2	5321	17	7225342	7234517	dishevelled segment polarity protein 2 [Source:HGNC Symbol;Acc:HGNC:3086]	1279	1172	1362	1378
ENSG00000005001	PRSS22	2384	16	2852730	2858170	serine protease 22 [Source:HGNC Symbol;Acc:HGNC:14368]	1292	1115	1856	1305
ENSG00000005007	UPF1	8934	19	18831959	18868230	UPF1 RNA helicase and ATPase [Source:HGNC Symbol;Acc:HGNC:9962]	3895	4377	15733	15931
ENSG00000005020	SKAP2	5361	7	26667068	26995239	src kinase associated phosphoprotein 2 [Source:HGNC Symbol;Acc:HGNC:15687]	4387	3999	2282	2477
ENSG00000005022	SLC25A5	1555	X	119468422	119471396	solute carrier family 25 member 5 [Source:HGNC Symbol;Acc:HGNC:10991]	11723	12084	18206	20090
ENSG00000005059	MCUB	3555	4	109560209	109688719	mitochondrial calcium uniporter dominant negative subunit beta [Source:HGNC Symbol;Acc:HGNC:26076]	435	422	393	356
ENSG00000005073	HOXA11	2669	7	27181157	27185232	homeobox A11 [Source:HGNC Symbol;Acc:HGNC:5101]	14	33	51	57
ENSG00000005075	POLR2J	937	7	102473128	102478922	RNA polymerase II subunit J [Source:HGNC Symbol;Acc:HGNC:9197]	496	341	857	756
ENSG00000005100	DHX33	5789	17	5440917	5468982	DEAH-box helicase 33 [Source:HGNC Symbol;Acc:HGNC:16718]	2265	2262	2156	1917
ENSG00000005102	MEOX1	2674	17	43640389	43661922	mesenchyme homeobox 1 [Source:HGNC Symbol;Acc:HGNC:7013]	4	0	0	0
ENSG00000005108	THSD7A	10915	7	11370365	11832198	thrombospondin type 1 domain containing 7A [Source:HGNC Symbol;Acc:HGNC:22207]	689	588	204	136
ENSG00000005156	LIG3	12901	17	34980512	35009743	DNA ligase 3 [Source:HGNC Symbol;Acc:HGNC:6600]	1306	1258	1477	1589
ENSG00000005175	RPAP3	5350	12	47661249	47706030	RNA polymerase II associated protein 3 [Source:HGNC Symbol;Acc:HGNC:26151]	1423	1457	1227	1577
ENSG00000005187	ACSM3	7510	16	20610243	20797581	acyl-CoA synthetase medium chain family member 3 [Source:HGNC Symbol;Acc:HGNC:10522]	1	0	1	1
ENSG00000005189	REXO5	4111	16	20806429	20849665	RNA exonuclease 5 [Source:HGNC Symbol;Acc:HGNC:24661]	220	245	306	351
ENSG00000005194	CIAPIN1	3383	16	57428187	57447420	cytokine induced apoptosis inhibitor 1 [Source:HGNC Symbol;Acc:HGNC:28050]	2824	2793	3423	3940
ENSG00000005206	SPPL2B	7419	19	2328615	2355095	signal peptide peptidase like 2B [Source:HGNC Symbol;Acc:HGNC:30627]	968	993	1498	1050
ENSG00000005238	ATOSB	6375	9	35104112	35116341	atos homolog B [Source:HGNC Symbol;Acc:HGNC:25666]	1209	1083	1065	1059
ENSG00000005243	COPZ2	1866	17	48026167	48038030	COPI coat complex subunit zeta 2 [Source:HGNC Symbol;Acc:HGNC:19356]	2	1	0	0
ENSG00000005249	PRKAR2B	12581	7	107044705	107161811	protein kinase cAMP-dependent type II regulatory subunit beta [Source:HGNC Symbol;Acc:HGNC:9392]	1418	1447	1748	1633
ENSG00000005302	MSL3	9780	X	11758159	11775772	MSL complex subunit 3 [Source:HGNC Symbol;Acc:HGNC:7370]	1352	1369	1465	1481
ENSG00000005339	CREBBP	15479	16	3725054	3880713	CREB binding protein [Source:HGNC Symbol;Acc:HGNC:2348]	4181	4239	3450	2872
ENSG00000005379	TSPOAP1	11389	17	58301228	58328795	TSPO associated protein 1 [Source:HGNC Symbol;Acc:HGNC:16831]	353	267	362	251
ENSG00000005421	PON1	2657	7	95297676	95324532	paraoxonase 1 [Source:HGNC Symbol;Acc:HGNC:9204]	0	0	0	0
ENSG00000005436	GCFC2	5462	2	75652000	75710985	GC-rich sequence DNA-binding factor 2 [Source:HGNC Symbol;Acc:HGNC:1317]	1479	1204	1021	1183
ENSG00000005448	WDR54	2852	2	74421678	74425755	WD repeat domain 54 [Source:HGNC Symbol;Acc:HGNC:25770]	236	179	216	274
ENSG00000005469	CROT	4995	7	87345664	87399794	carnitine O-octanoyltransferase [Source:HGNC Symbol;Acc:HGNC:2366]	462	460	222	280
ENSG00000005471	ABCB4	7728	7	87401696	87480435	ATP binding cassette subfamily B member 4 [Source:HGNC Symbol;Acc:HGNC:45]	0	0	0	2
ENSG00000005483	KMT2E	13704	7	104940943	105115019	lysine methyltransferase 2E (inactive) [Source:HGNC Symbol;Acc:HGNC:18541]	4065	3664	2889	1906
ENSG00000005486	RHBDD2	2390	7	75842602	75888926	rhomboid domain containing 2 [Source:HGNC Symbol;Acc:HGNC:23082]	2377	2310	2118	2962
ENSG00000005700	IBTK	8719	6	82169986	82247754	inhibitor of Bruton tyrosine kinase [Source:HGNC Symbol;Acc:HGNC:17853]	5463	5147	4422	4187
ENSG00000005801	ZNF195	11711	11	3339261	3379222	zinc finger protein 195 [Source:HGNC Symbol;Acc:HGNC:12986]	574	641	445	473
ENSG00000005810	MYCBP2	34127	13	77042474	77327094	MYC binding protein 2 [Source:HGNC Symbol;Acc:HGNC:23386]	4748	4925	2946	2004
ENSG00000005812	FBXL3	7076	13	76992598	77027195	F-box and leucine rich repeat protein 3 [Source:HGNC Symbol;Acc:HGNC:13599]	2148	2151	1614	1816
ENSG00000005844	ITGAL	9864	16	30472658	30523567	integrin subunit alpha L [Source:HGNC Symbol;Acc:HGNC:6148]	26	35	11	24
ENSG00000005882	PDK2	5471	17	50094737	50112152	pyruvate dehydrogenase kinase 2 [Source:HGNC Symbol;Acc:HGNC:8810]	100	146	190	173
ENSG00000005884	ITGA3	9802	17	50055968	50090481	integrin subunit alpha 3 [Source:HGNC Symbol;Acc:HGNC:6139]	10919	10804	9705	10990
ENSG00000005889	ZFX	9037	X	24149173	24216255	zinc finger protein X-linked [Source:HGNC Symbol;Acc:HGNC:12869]	1421	1177	1457	1262
ENSG00000005893	LAMP2	10628	X	120426148	120469365	lysosomal associated membrane protein 2 [Source:HGNC Symbol;Acc:HGNC:6501]	8889	8375	6389	6905
ENSG00000005961	ITGA2B	5695	17	44372180	44389649	integrin subunit alpha 2b [Source:HGNC Symbol;Acc:HGNC:6138]	20	59	26	34
ENSG00000005981	ASB4	4606	7	95478444	95540233	ankyrin repeat and SOCS box containing 4 [Source:HGNC Symbol;Acc:HGNC:16009]	0	2	0	0
ENSG00000006007	GDE1	4390	16	19501693	19522123	glycerophosphodiester phosphodiesterase 1 [Source:HGNC Symbol;Acc:HGNC:29644]	4264	3893	3553	4351
ENSG00000006015	REX1BD	3371	19	18588685	18592337	required for excision 1-B domain containing [Source:HGNC Symbol;Acc:HGNC:26098]	955	865	2277	1840
ENSG00000006016	CRLF1	2967	19	18572220	18607741	cytokine receptor like factor 1 [Source:HGNC Symbol;Acc:HGNC:2364]	199	196	203	317
ENSG00000006025	OSBPL7	6541	17	47807372	47821803	oxysterol binding protein like 7 [Source:HGNC Symbol;Acc:HGNC:16387]	209	256	573	330
ENSG00000006042	TMEM98	5187	17	32927910	32945106	transmembrane protein 98 [Source:HGNC Symbol;Acc:HGNC:24529]	18	36	13	7
ENSG00000006047	YBX2	4631	17	7288263	7294639	Y-box binding protein 2 [Source:HGNC Symbol;Acc:HGNC:17948]	297	334	495	462
ENSG00000006062	MAP3K14	5668	17	45263119	45317029	mitogen-activated protein kinase kinase kinase 14 [Source:HGNC Symbol;Acc:HGNC:6853]	1107	926	548	599
ENSG00000006118	TMEM132A	7274	11	60924460	60937159	transmembrane protein 132A [Source:HGNC Symbol;Acc:HGNC:31092]	12094	11458	13825	15629
ENSG00000006125	AP2B1	7591	17	35578046	35726413	adaptor related protein complex 2 subunit beta 1 [Source:HGNC Symbol;Acc:HGNC:563]	12353	11864	6863	8608
ENSG00000006194	ZNF263	8450	16	3283283	3301401	zinc finger protein 263 [Source:HGNC Symbol;Acc:HGNC:13056]	499	515	405	387
ENSG00000006210	CX3CL1	5960	16	57372477	57385044	C-X3-C motif chemokine ligand 1 [Source:HGNC Symbol;Acc:HGNC:10647]	7397	6745	6272	6775
ENSG00000006282	SPATA20	5237	17	50543058	50555852	spermatogenesis associated 20 [Source:HGNC Symbol;Acc:HGNC:26125]	625	612	984	802
ENSG00000006283	CACNA1G	10062	17	50560715	50627474	calcium voltage-gated channel subunit alpha1 G [Source:HGNC Symbol;Acc:HGNC:1394]	8	6	19	13
ENSG00000006327	TNFRSF12A	1801	16	3018445	3022383	TNF receptor superfamily member 12A [Source:HGNC Symbol;Acc:HGNC:18152]	5416	4927	7160	6717
ENSG00000006432	MAP3K9	12386	14	70722526	70809534	mitogen-activated protein kinase kinase kinase 9 [Source:HGNC Symbol;Acc:HGNC:6861]	4652	4640	2576	2357
ENSG00000006451	RALA	3579	7	39623565	39708120	RAS like proto-oncogene A [Source:HGNC Symbol;Acc:HGNC:9839]	3972	4039	4564	5097
ENSG00000006453	BAIAP2L1	4821	7	98291650	98401090	BAR/IMD domain containing adaptor protein 2 like 1 [Source:HGNC Symbol;Acc:HGNC:21649]	1629	1542	1289	1387
ENSG00000006459	KDM7A	9378	7	140084746	140176983	lysine demethylase 7A [Source:HGNC Symbol;Acc:HGNC:22224]	904	865	661	638
ENSG00000006468	ETV1	9592	7	13891229	13991425	ETS variant transcription factor 1 [Source:HGNC Symbol;Acc:HGNC:3490]	146	113	85	70
ENSG00000006530	AGK	10697	7	141551278	141655244	acylglycerol kinase [Source:HGNC Symbol;Acc:HGNC:21869]	1272	1295	1221	1031
ENSG00000006534	ALDH3B1	6622	11	68008578	68029282	aldehyde dehydrogenase 3 family member B1 [Source:HGNC Symbol;Acc:HGNC:410]	771	754	306	407
ENSG00000006555	TTC22	6111	1	54779712	54801323	tetratricopeptide repeat domain 22 [Source:HGNC Symbol;Acc:HGNC:26067]	674	668	674	643
ENSG00000006576	PHTF2	8665	7	77798773	77957503	putative homeodomain transcription factor 2 [Source:HGNC Symbol;Acc:HGNC:13411]	1548	1731	1144	930
ENSG00000006606	CCL26	703	7	75769533	75789896	C-C motif chemokine ligand 26 [Source:HGNC Symbol;Acc:HGNC:10625]	0	0	4	0
ENSG00000006607	FARP2	14371	2	241356285	241494841	FERM, ARH/RhoGEF and pleckstrin domain protein 2 [Source:HGNC Symbol;Acc:HGNC:16460]	2309	2144	1262	1284
ENSG00000006625	GGCT	1594	7	30496621	30504841	gamma-glutamylcyclotransferase [Source:HGNC Symbol;Acc:HGNC:21705]	1172	1082	1810	1701
ENSG00000006634	DBF4	4595	7	87876216	87909553	DBF4 zinc finger [Source:HGNC Symbol;Acc:HGNC:17364]	1192	1167	1289	1408
ENSG00000006638	TBXA2R	2827	19	3594507	3606875	thromboxane A2 receptor [Source:HGNC Symbol;Acc:HGNC:11608]	10	9	8	0
ENSG00000006652	IFRD1	7902	7	112422887	112481017	interferon related developmental regulator 1 [Source:HGNC Symbol;Acc:HGNC:5456]	798	832	721	749
ENSG00000006659	LGALS14	904	19	39704481	39709444	galectin 14 [Source:HGNC Symbol;Acc:HGNC:30054]	0	0	2	0
ENSG00000006695	COX10	6756	17	14069490	14231736	cytochrome c oxidase assembly factor heme A:farnesyltransferase COX10 [Source:HGNC Symbol;Acc:HGNC:2260]	1073	1122	1012	1031
ENSG00000006704	GTF2IRD1	6499	7	74453790	74602605	GTF2I repeat domain containing 1 [Source:HGNC Symbol;Acc:HGNC:4661]	1637	1567	1418	1561
ENSG00000006712	PAF1	2850	19	39385629	39391154	PAF1 homolog, Paf1/RNA polymerase II complex component [Source:HGNC Symbol;Acc:HGNC:25459]	3557	3609	4075	4996
ENSG00000006715	VPS41	7752	7	38722974	38932394	VPS41 subunit of HOPS complex [Source:HGNC Symbol;Acc:HGNC:12713]	2370	2488	2293	2308
ENSG00000006740	ARHGAP44	9322	17	12789498	12991643	Rho GTPase activating protein 44 [Source:HGNC Symbol;Acc:HGNC:29096]	0	4	5	11
ENSG00000006744	ELAC2	7002	17	12991612	13018065	elaC ribonuclease Z 2 [Source:HGNC Symbol;Acc:HGNC:14198]	3196	3325	3053	3651
ENSG00000006747	SCIN	11626	7	12570577	12660182	scinderin [Source:HGNC Symbol;Acc:HGNC:21695]	42	59	83	71
ENSG00000006756	ARSD	7026	X	2903972	2929349	arylsulfatase D [Source:HGNC Symbol;Acc:HGNC:717]	1981	2119	1533	1809
ENSG00000006757	PNPLA4	3411	X	7898247	7927739	patatin like phospholipase domain containing 4 [Source:HGNC Symbol;Acc:HGNC:24887]	122	142	129	199
ENSG00000006831	ADIPOR2	5831	12	1688574	1788674	adiponectin receptor 2 [Source:HGNC Symbol;Acc:HGNC:24041]	4056	4083	2909	3059
ENSG00000006837	CDKL3	3149	5	134286350	134371047	cyclin dependent kinase like 3 [Source:HGNC Symbol;Acc:HGNC:15483]	7	10	32	4
ENSG00000007001	UPP2	2957	2	157876702	158136154	uridine phosphorylase 2 [Source:HGNC Symbol;Acc:HGNC:23061]	16	4	6	14
ENSG00000007047	MARK4	6656	19	45079288	45305284	microtubule affinity regulating kinase 4 [Source:HGNC Symbol;Acc:HGNC:13538]	1888	1963	2014	2368
ENSG00000007062	PROM1	7457	4	15963076	16084378	prominin 1 [Source:HGNC Symbol;Acc:HGNC:9454]	5320	5156	3686	3634
ENSG00000007080	CCDC124	1661	19	17933015	17943991	coiled-coil domain containing 124 [Source:HGNC Symbol;Acc:HGNC:25171]	3538	3488	5222	5734
ENSG00000007168	PAFAH1B1	13771	17	2593210	2685615	platelet activating factor acetylhydrolase 1b regulatory subunit 1 [Source:HGNC Symbol;Acc:HGNC:8574]	5020	4903	4070	4842
ENSG00000007171	NOS2	6129	17	27756766	27800529	nitric oxide synthase 2 [Source:HGNC Symbol;Acc:HGNC:7873]	0	0	0	0
ENSG00000007174	DNAH9	16941	17	11598470	11969748	dynein axonemal heavy chain 9 [Source:HGNC Symbol;Acc:HGNC:2953]	0	0	0	0
ENSG00000007202	BLTP2	9232	17	28614446	28645454	bridge-like lipid transfer protein family member 2 [Source:HGNC Symbol;Acc:HGNC:28960]	8824	8916	6418	6965
ENSG00000007216	SLC13A2	3226	17	28473293	28497781	solute carrier family 13 member 2 [Source:HGNC Symbol;Acc:HGNC:10917]	0	2	2	2
ENSG00000007237	GAS7	10158	17	9910606	10198606	growth arrest specific 7 [Source:HGNC Symbol;Acc:HGNC:4169]	4548	4355	3451	3802
ENSG00000007255	TRAPPC6A	933	19	45162928	45178237	trafficking protein particle complex subunit 6A [Source:HGNC Symbol;Acc:HGNC:23069]	826	845	934	1090
ENSG00000007264	MATK	4138	19	3777970	3802129	megakaryocyte-associated tyrosine kinase [Source:HGNC Symbol;Acc:HGNC:6906]	0	0	3	16
ENSG00000007306	CEACAM7	2653	19	41673303	41706976	CEA cell adhesion molecule 7 [Source:HGNC Symbol;Acc:HGNC:1819]	0	0	0	0
ENSG00000007341	ST7L	8108	1	112523514	112620825	suppression of tumorigenicity 7 like [Source:HGNC Symbol;Acc:HGNC:18441]	533	545	739	649
ENSG00000007372	PAX6	20639	11	31784779	31817961	paired box 6 [Source:HGNC Symbol;Acc:HGNC:8620]	122	131	194	172
ENSG00000007376	RPUSD1	2769	16	784974	788397	RNA pseudouridine synthase domain containing 1 [Source:HGNC Symbol;Acc:HGNC:14173]	1079	1236	1450	1772
ENSG00000007384	RHBDF1	4914	16	58059	76355	rhomboid 5 homolog 1 [Source:HGNC Symbol;Acc:HGNC:20561]	737	759	1750	1430
ENSG00000007392	LUC7L	6176	16	188969	229463	LUC7 like [Source:HGNC Symbol;Acc:HGNC:6723]	404	390	1280	812
ENSG00000007402	CACNA2D2	6508	3	50362613	50504244	calcium voltage-gated channel auxiliary subunit alpha2delta 2 [Source:HGNC Symbol;Acc:HGNC:1400]	37	33	46	29
ENSG00000007516	BAIAP3	6808	16	1333638	1349439	BAI1 associated protein 3 [Source:HGNC Symbol;Acc:HGNC:948]	7	2	8	9
ENSG00000007520	TSR3	1210	16	1349240	1351878	TSR3 ribosome maturation factor [Source:HGNC Symbol;Acc:HGNC:14175]	1388	1430	1583	2235
ENSG00000007541	PIGQ	7856	16	566995	584109	phosphatidylinositol glycan anchor biosynthesis class Q [Source:HGNC Symbol;Acc:HGNC:14135]	1018	1260	1350	1654
ENSG00000007545	CRAMP1	8596	16	1612337	1677908	cramped chromatin regulator homolog 1 [Source:HGNC Symbol;Acc:HGNC:14122]	886	936	1008	867
ENSG00000007866	TEAD3	3049	6	35473597	35497079	TEA domain transcription factor 3 [Source:HGNC Symbol;Acc:HGNC:11716]	2802	2753	3227	3638
ENSG00000007908	SELE	4586	1	169722640	169764705	selectin E [Source:HGNC Symbol;Acc:HGNC:10718]	0	0	0	0
ENSG00000007923	DNAJC11	12182	1	6634168	6701924	DnaJ heat shock protein family (Hsp40) member C11 [Source:HGNC Symbol;Acc:HGNC:25570]	1353	1413	1393	1237
ENSG00000007933	FMO3	3439	1	171090901	171117819	flavin containing dimethylaniline monoxygenase 3 [Source:HGNC Symbol;Acc:HGNC:3771]	14	9	0	0
ENSG00000007944	MYLIP	3072	6	16129086	16148248	myosin regulatory light chain interacting protein [Source:HGNC Symbol;Acc:HGNC:21155]	442	473	385	348
ENSG00000007952	NOX1	2543	X	100843324	100874359	NADPH oxidase 1 [Source:HGNC Symbol;Acc:HGNC:7889]	10	4	15	11
ENSG00000007968	E2F2	5462	1	23506438	23531233	E2F transcription factor 2 [Source:HGNC Symbol;Acc:HGNC:3114]	3988	4164	3334	3934
ENSG00000008018	PSMB1	2219	6	170535120	170553307	proteasome 20S subunit beta 1 [Source:HGNC Symbol;Acc:HGNC:9537]	5922	5505	7969	9183
ENSG00000008056	SYN1	3733	X	47571901	47619857	synapsin I [Source:HGNC Symbol;Acc:HGNC:11494]	5	11	16	22
ENSG00000008083	JARID2	6244	6	15246069	15522042	jumonji and AT-rich interaction domain containing 2 [Source:HGNC Symbol;Acc:HGNC:6196]	2352	2226	1767	1744
ENSG00000008086	CDKL5	19056	X	18425583	18653629	cyclin dependent kinase like 5 [Source:HGNC Symbol;Acc:HGNC:11411]	1005	982	501	415
ENSG00000008118	CAMK1G	3328	1	209583714	209613939	calcium/calmodulin dependent protein kinase IG [Source:HGNC Symbol;Acc:HGNC:14585]	0	1	1	0
ENSG00000008128	CDK11A	5085	1	1702379	1724357	cyclin dependent kinase 11A [Source:HGNC Symbol;Acc:HGNC:1730]	31	23	42	40
ENSG00000008130	NADK	5570	1	1751232	1780457	NAD kinase [Source:HGNC Symbol;Acc:HGNC:29831]	1712	1842	2711	2662
ENSG00000008196	TFAP2B	6155	6	50818723	50847619	transcription factor AP-2 beta [Source:HGNC Symbol;Acc:HGNC:11743]	7	0	0	0
ENSG00000008197	TFAP2D	2203	6	50713526	50773033	transcription factor AP-2 delta [Source:HGNC Symbol;Acc:HGNC:15581]	0	0	0	2
ENSG00000008226	DLEC1	8338	3	38039205	38124025	DLEC1 cilia and flagella associated protein [Source:HGNC Symbol;Acc:HGNC:2899]	0	2	12	2
ENSG00000008256	CYTH3	5802	7	6161779	6272644	cytohesin 3 [Source:HGNC Symbol;Acc:HGNC:9504]	2506	2498	2377	2018
ENSG00000008277	ADAM22	13668	7	87934143	88202889	ADAM metallopeptidase domain 22 [Source:HGNC Symbol;Acc:HGNC:201]	549	513	365	299
ENSG00000008282	SYPL1	2909	7	106090505	106112589	synaptophysin like 1 [Source:HGNC Symbol;Acc:HGNC:11507]	3798	3793	4673	4887
ENSG00000008283	CYB561	5296	17	63432304	63446354	cytochrome b561 [Source:HGNC Symbol;Acc:HGNC:2571]	6388	6561	4350	5532
ENSG00000008294	SPAG9	11951	17	50962174	51120868	sperm associated antigen 9 [Source:HGNC Symbol;Acc:HGNC:14524]	4970	5191	4065	3709
ENSG00000008300	CELSR3	13850	3	48636463	48662886	cadherin EGF LAG seven-pass G-type receptor 3 [Source:HGNC Symbol;Acc:HGNC:3230]	193	186	220	135
ENSG00000008311	AASS	10816	7	122064583	122144308	aminoadipate-semialdehyde synthase [Source:HGNC Symbol;Acc:HGNC:17366]	10	2	0	0
ENSG00000008323	PLEKHG6	4316	12	6310436	6328506	pleckstrin homology and RhoGEF domain containing G6 [Source:HGNC Symbol;Acc:HGNC:25562]	421	413	334	454
ENSG00000008324	SS18L2	3118	3	42581840	42596934	SS18 like 2 [Source:HGNC Symbol;Acc:HGNC:15593]	228	199	413	253
ENSG00000008382	MPND	2049	19	4343527	4360086	MPN domain containing [Source:HGNC Symbol;Acc:HGNC:25934]	229	226	228	258
ENSG00000008394	MGST1	7441	12	16347142	16609259	microsomal glutathione S-transferase 1 [Source:HGNC Symbol;Acc:HGNC:7061]	3729	3750	7148	6178
ENSG00000008405	CRY1	4782	12	106991364	107093549	cryptochrome circadian regulator 1 [Source:HGNC Symbol;Acc:HGNC:2384]	1143	1293	1158	1290
ENSG00000008438	PGLYRP1	708	19	46019153	46023053	peptidoglycan recognition protein 1 [Source:HGNC Symbol;Acc:HGNC:8904]	0	7	2	2
ENSG00000008441	NFIX	6486	19	12995475	13098796	nuclear factor I X [Source:HGNC Symbol;Acc:HGNC:7788]	10736	11099	7644	8694
ENSG00000008513	ST3GAL1	8787	8	133454848	133571926	ST3 beta-galactoside alpha-2,3-sialyltransferase 1 [Source:HGNC Symbol;Acc:HGNC:10862]	4025	4171	3454	3366
ENSG00000008516	MMP25	4745	16	3046062	3060726	matrix metallopeptidase 25 [Source:HGNC Symbol;Acc:HGNC:14246]	18	5	13	26
ENSG00000008517	IL32	3209	16	3065297	3082192	interleukin 32 [Source:HGNC Symbol;Acc:HGNC:16830]	26	26	52	39
ENSG00000008710	PKD1	18534	16	2088708	2135898	polycystin 1, transient receptor potential channel interacting [Source:HGNC Symbol;Acc:HGNC:9008]	3453	3165	3951	2445
ENSG00000008735	MAPK8IP2	5793	22	50600793	50613981	mitogen-activated protein kinase 8 interacting protein 2 [Source:HGNC Symbol;Acc:HGNC:6883]	352	351	536	627
ENSG00000008838	MED24	6962	17	40019097	40061215	mediator complex subunit 24 [Source:HGNC Symbol;Acc:HGNC:22963]	2880	3066	2345	2645
ENSG00000008853	RHOBTB2	7408	8	22987417	23020509	Rho related BTB domain containing 2 [Source:HGNC Symbol;Acc:HGNC:18756]	632	604	633	720
ENSG00000008869	HEATR5B	8238	2	36968383	37084372	HEAT repeat containing 5B [Source:HGNC Symbol;Acc:HGNC:29273]	2584	2640	2162	1599
ENSG00000008952	SEC62	7928	3	169966635	169998373	SEC62 homolog, preprotein translocation factor [Source:HGNC Symbol;Acc:HGNC:11846]	4167	3890	3249	4147
ENSG00000008988	RPS20	6765	8	56067254	56074510	ribosomal protein S20 [Source:HGNC Symbol;Acc:HGNC:10405]	5066	5074	10044	10066
ENSG00000009307	CSDE1	9830	1	114716913	114758676	cold shock domain containing E1 [Source:HGNC Symbol;Acc:HGNC:29905]	49758	47400	42946	49326
ENSG00000009335	UBE3C	9203	7	157138926	157269370	ubiquitin protein ligase E3C [Source:HGNC Symbol;Acc:HGNC:16803]	6333	6051	4711	4806
ENSG00000009413	REV3L	12420	6	111299028	111483715	REV3 like, DNA directed polymerase zeta catalytic subunit [Source:HGNC Symbol;Acc:HGNC:9968]	5895	5587	3118	1755
ENSG00000009694	TENM1	13547	X	124375903	125204312	teneurin transmembrane protein 1 [Source:HGNC Symbol;Acc:HGNC:8117]	87	143	81	64
ENSG00000009709	PAX7	6473	1	18630846	18748866	paired box 7 [Source:HGNC Symbol;Acc:HGNC:8621]	293	314	491	459
ENSG00000009724	MASP2	5113	1	11022009	11047239	MBL associated serine protease 2 [Source:HGNC Symbol;Acc:HGNC:6902]	18	8	20	16
ENSG00000009765	IYD	10362	6	150368892	150405969	iodotyrosine deiodinase [Source:HGNC Symbol;Acc:HGNC:21071]	21	13	8	14
ENSG00000009780	FAM76A	4046	1	27725961	27763116	family with sequence similarity 76 member A [Source:HGNC Symbol;Acc:HGNC:28530]	503	452	302	384
ENSG00000009790	TRAF3IP3	7750	1	209756032	209782320	TRAF3 interacting protein 3 [Source:HGNC Symbol;Acc:HGNC:30766]	12	7	4	12
ENSG00000009830	POMT2	13203	14	77274956	77320883	protein O-mannosyltransferase 2 [Source:HGNC Symbol;Acc:HGNC:19743]	1300	1290	1194	1199
ENSG00000009844	VTA1	7258	6	142147162	142224685	vesicle trafficking 1 [Source:HGNC Symbol;Acc:HGNC:20954]	3759	3868	2837	3078
ENSG00000009950	MLXIPL	4815	7	73593194	73624543	MLX interacting protein like [Source:HGNC Symbol;Acc:HGNC:12744]	8	8	32	24
ENSG00000009954	BAZ1B	7060	7	73440406	73522293	bromodomain adjacent to zinc finger domain 1B [Source:HGNC Symbol;Acc:HGNC:961]	6550	6946	5410	5832
ENSG00000010017	RANBP9	3618	6	13621498	13711835	RAN binding protein 9 [Source:HGNC Symbol;Acc:HGNC:13727]	6094	5943	5602	5242
ENSG00000010030	ETV7	2374	6	36354091	36387800	ETS variant transcription factor 7 [Source:HGNC Symbol;Acc:HGNC:18160]	350	305	250	288
ENSG00000010072	SPRTN	5906	1	231337104	231355023	SprT-like N-terminal domain [Source:HGNC Symbol;Acc:HGNC:25356]	905	885	853	821
ENSG00000010165	METTL13	3831	1	171781660	171814023	methyltransferase 13, eEF1A lysine and N-terminal methyltransferase [Source:HGNC Symbol;Acc:HGNC:24248]	3041	3093	2967	3266
ENSG00000010219	DYRK4	7050	12	4562208	4615302	dual specificity tyrosine phosphorylation regulated kinase 4 [Source:HGNC Symbol;Acc:HGNC:3095]	72	53	89	71
ENSG00000010244	ZNF207	15818	17	32350132	32381885	zinc finger protein 207 [Source:HGNC Symbol;Acc:HGNC:12998]	4520	4495	4812	4791
ENSG00000010256	UQCRC1	3204	3	48599002	48610976	ubiquinol-cytochrome c reductase core protein 1 [Source:HGNC Symbol;Acc:HGNC:12585]	8169	8513	8553	12265
ENSG00000010270	STARD3NL	4324	7	38178245	38230670	STARD3 N-terminal like [Source:HGNC Symbol;Acc:HGNC:19169]	138	90	175	140
ENSG00000010278	CD9	5829	12	6199715	6238271	CD9 molecule [Source:HGNC Symbol;Acc:HGNC:1709]	4321	3783	5425	4876
ENSG00000010282	HHATL	2888	3	42692663	42702824	hedgehog acyltransferase like [Source:HGNC Symbol;Acc:HGNC:13242]	0	0	0	0
ENSG00000010292	NCAPD2	6470	12	6493356	6531955	non-SMC condensin I complex subunit D2 [Source:HGNC Symbol;Acc:HGNC:24305]	3757	4507	4339	4156
ENSG00000010295	IFFO1	4945	12	6538961	6556073	intermediate filament family orphan 1 [Source:HGNC Symbol;Acc:HGNC:24970]	0	0	8	10
ENSG00000010310	GIPR	5069	19	45668221	45683722	gastric inhibitory polypeptide receptor [Source:HGNC Symbol;Acc:HGNC:4271]	11	10	36	34
ENSG00000010318	PHF7	3364	3	52410660	52423641	PHD finger protein 7 [Source:HGNC Symbol;Acc:HGNC:18458]	84	103	121	74
ENSG00000010319	SEMA3G	5047	3	52433035	52445103	semaphorin 3G [Source:HGNC Symbol;Acc:HGNC:30400]	111	115	100	134
ENSG00000010322	NISCH	9062	3	52455118	52493068	nischarin [Source:HGNC Symbol;Acc:HGNC:18006]	3054	2963	2380	1938
ENSG00000010327	STAB1	10588	3	52495338	52524495	stabilin 1 [Source:HGNC Symbol;Acc:HGNC:18628]	4	2	6	0
ENSG00000010361	FUZ	2953	19	49806866	49817376	fuzzy planar cell polarity protein [Source:HGNC Symbol;Acc:HGNC:26219]	3	4	0	0
ENSG00000010379	SLC6A13	4243	12	220621	262873	solute carrier family 6 member 13 [Source:HGNC Symbol;Acc:HGNC:11046]	2	0	0	0
ENSG00000010404	IDS	9294	X	149476988	149521096	iduronate 2-sulfatase [Source:HGNC Symbol;Acc:HGNC:5389]	889	750	716	443
ENSG00000010438	PRSS3	1425	9	33750679	33799231	serine protease 3 [Source:HGNC Symbol;Acc:HGNC:9486]	0	2	4	2
ENSG00000010539	ZNF200	7498	16	3222325	3236221	zinc finger protein 200 [Source:HGNC Symbol;Acc:HGNC:12993]	348	418	382	378
ENSG00000010610	CD4	4557	12	6786858	6820799	CD4 molecule [Source:HGNC Symbol;Acc:HGNC:1678]	2	0	0	0
ENSG00000010626	LRRC23	3052	12	6873569	6914241	leucine rich repeat containing 23 [Source:HGNC Symbol;Acc:HGNC:19138]	140	87	136	149
ENSG00000010671	BTK	7817	X	101349338	101390796	Bruton tyrosine kinase [Source:HGNC Symbol;Acc:HGNC:1133]	2	6	0	0
ENSG00000010704	HFE	5675	6	26087281	26098343	homeostatic iron regulator [Source:HGNC Symbol;Acc:HGNC:4886]	559	538	441	329
ENSG00000010803	SCMH1	4602	1	41027202	41242306	Scm polycomb group protein homolog 1 [Source:HGNC Symbol;Acc:HGNC:19003]	2791	2940	2484	2549
ENSG00000010810	FYN	7411	6	111660332	111873452	FYN proto-oncogene, Src family tyrosine kinase [Source:HGNC Symbol;Acc:HGNC:4037]	170	122	174	166
ENSG00000010818	HIVEP2	11272	6	142751469	142956698	HIVEP zinc finger 2 [Source:HGNC Symbol;Acc:HGNC:4921]	5834	5468	3053	2481
ENSG00000010932	FMO1	3602	1	171248471	171285978	flavin containing dimethylaniline monoxygenase 1 [Source:HGNC Symbol;Acc:HGNC:3769]	5	4	2	0
ENSG00000011007	ELOA	5348	1	23743448	23762059	elongin A [Source:HGNC Symbol;Acc:HGNC:11620]	4454	4686	4308	4609
ENSG00000011009	LYPLA2	2021	1	23791145	23795539	lysophospholipase 2 [Source:HGNC Symbol;Acc:HGNC:6738]	3574	3858	4244	5269
ENSG00000011021	CLCN6	8173	1	11806096	11848079	chloride voltage-gated channel 6 [Source:HGNC Symbol;Acc:HGNC:2024]	453	412	864	575
ENSG00000011028	MRC2	6591	17	62627670	62693597	mannose receptor C type 2 [Source:HGNC Symbol;Acc:HGNC:16875]	71	93	94	120
ENSG00000011105	TSPAN9	6905	12	3077355	3286564	tetraspanin 9 [Source:HGNC Symbol;Acc:HGNC:21640]	3696	4065	4217	4569
ENSG00000011114	BTBD7	11333	14	93237550	93333092	BTB domain containing 7 [Source:HGNC Symbol;Acc:HGNC:18269]	2352	2171	2129	1910
ENSG00000011132	APBA3	5596	19	3750772	3761692	amyloid beta precursor protein binding family A member 3 [Source:HGNC Symbol;Acc:HGNC:580]	542	614	671	737
ENSG00000011143	MKS1	11285	17	58205441	58219605	MKS transition zone complex subunit 1 [Source:HGNC Symbol;Acc:HGNC:7121]	106	149	167	174
ENSG00000011198	ABHD5	7539	3	43690108	43734371	abhydrolase domain containing 5, lysophosphatidic acid acyltransferase [Source:HGNC Symbol;Acc:HGNC:21396]	1812	1838	1345	1284
ENSG00000011201	ANOS1	7082	X	8528874	8732137	anosmin 1 [Source:HGNC Symbol;Acc:HGNC:6211]	104	102	145	148
ENSG00000011243	AKAP8L	8576	19	15380050	15419141	A-kinase anchoring protein 8 like [Source:HGNC Symbol;Acc:HGNC:29857]	1045	1125	1633	1543
ENSG00000011258	MBTD1	7184	17	51177425	51260163	mbt domain containing 1 [Source:HGNC Symbol;Acc:HGNC:19866]	795	703	763	543
ENSG00000011260	UTP18	2703	17	51260546	51297936	UTP18 small subunit processome component [Source:HGNC Symbol;Acc:HGNC:24274]	1704	1706	1940	2462
ENSG00000011275	RNF216	7576	7	5620047	5781696	ring finger protein 216 [Source:HGNC Symbol;Acc:HGNC:21698]	4161	4297	3797	3856
ENSG00000011295	TTC19	6054	17	15999784	16045015	tetratricopeptide repeat domain 19 [Source:HGNC Symbol;Acc:HGNC:26006]	4558	4209	3201	3910
ENSG00000011304	PTBP1	7521	19	797075	812327	polypyrimidine tract binding protein 1 [Source:HGNC Symbol;Acc:HGNC:9583]	20199	21268	18178	20427
ENSG00000011332	DPF1	4800	19	38211006	38229714	double PHD fingers 1 [Source:HGNC Symbol;Acc:HGNC:20225]	210	175	220	249
ENSG00000011347	SYT7	7552	11	61513714	61581148	synaptotagmin 7 [Source:HGNC Symbol;Acc:HGNC:11514]	4743	5153	5401	5931
ENSG00000011376	LARS2	12407	3	45388561	45554726	leucyl-tRNA synthetase 2, mitochondrial [Source:HGNC Symbol;Acc:HGNC:17095]	1116	1122	887	964
ENSG00000011405	PIK3C2A	9207	11	17077730	17207986	phosphatidylinositol-4-phosphate 3-kinase catalytic subunit type 2 alpha [Source:HGNC Symbol;Acc:HGNC:8971]	3995	4205	3606	2227
ENSG00000011422	PLAUR	4457	19	43646095	43670547	plasminogen activator, urokinase receptor [Source:HGNC Symbol;Acc:HGNC:9053]	1074	967	1833	2158
ENSG00000011426	ANLN	5997	7	36389821	36453791	anillin, actin binding protein [Source:HGNC Symbol;Acc:HGNC:14082]	12198	12625	8016	7404
ENSG00000011451	WIZ	10037	19	15419978	15449956	WIZ zinc finger [Source:HGNC Symbol;Acc:HGNC:30917]	4525	5083	5456	5631
ENSG00000011454	RABGAP1	7656	9	122940833	123104866	RAB GTPase activating protein 1 [Source:HGNC Symbol;Acc:HGNC:17155]	2368	2447	1867	1874
ENSG00000011478	QPCTL	2825	19	45692403	45703989	glutaminyl-peptide cyclotransferase like [Source:HGNC Symbol;Acc:HGNC:25952]	659	763	1160	1396
ENSG00000011485	PPP5C	7089	19	46347087	46392981	protein phosphatase 5 catalytic subunit [Source:HGNC Symbol;Acc:HGNC:9322]	3303	3232	3778	3780
ENSG00000011523	CEP68	11832	2	65056354	65087004	centrosomal protein 68 [Source:HGNC Symbol;Acc:HGNC:29076]	859	759	597	570
ENSG00000011566	MAP4K3	6056	2	39249266	39437301	mitogen-activated protein kinase kinase kinase kinase 3 [Source:HGNC Symbol;Acc:HGNC:6865]	2463	2194	1763	1397
ENSG00000011590	ZBTB32	2739	19	35704558	35717038	zinc finger and BTB domain containing 32 [Source:HGNC Symbol;Acc:HGNC:16763]	6	18	4	6
ENSG00000011638	LDAF1	2558	16	21158377	21180616	lipid droplet assembly factor 1 [Source:HGNC Symbol;Acc:HGNC:30136]	1507	1567	1041	1501
ENSG00000011677	GABRA3	4150	X	152166234	152451315	gamma-aminobutyric acid type A receptor subunit alpha3 [Source:HGNC Symbol;Acc:HGNC:4077]	2143	2034	1257	1451
ENSG00000012048	BRCA1	14160	17	43044295	43170245	BRCA1 DNA repair associated [Source:HGNC Symbol;Acc:HGNC:1100]	2130	2212	1504	1296
ENSG00000012061	ERCC1	5575	19	45407334	45478828	ERCC excision repair 1, endonuclease non-catalytic subunit [Source:HGNC Symbol;Acc:HGNC:3433]	1252	1194	1475	1862
ENSG00000012124	CD22	6165	19	35319261	35347361	CD22 molecule [Source:HGNC Symbol;Acc:HGNC:1643]	370	325	136	143
ENSG00000012171	SEMA3B	5768	3	50267558	50277546	semaphorin 3B [Source:HGNC Symbol;Acc:HGNC:10724]	195	134	183	143
ENSG00000012174	MBTPS2	8945	X	21839617	21885423	membrane bound transcription factor peptidase, site 2 [Source:HGNC Symbol;Acc:HGNC:15455]	2477	2489	1815	1702
ENSG00000012211	PRICKLE3	3656	X	49174802	49186528	prickle planar cell polarity protein 3 [Source:HGNC Symbol;Acc:HGNC:6645]	645	798	846	837
ENSG00000012223	LTF	3989	3	46435645	46485234	lactotransferrin [Source:HGNC Symbol;Acc:HGNC:6720]	0	0	0	0
ENSG00000012232	EXTL3	16477	8	28600469	28756561	exostosin like glycosyltransferase 3 [Source:HGNC Symbol;Acc:HGNC:3518]	5386	5473	2744	3176
ENSG00000012660	ELOVL5	3813	6	53267398	53349179	ELOVL fatty acid elongase 5 [Source:HGNC Symbol;Acc:HGNC:21308]	9192	9073	7682	8487
ENSG00000012779	ALOX5	3728	10	45374176	45446119	arachidonate 5-lipoxygenase [Source:HGNC Symbol;Acc:HGNC:435]	234	193	438	369
ENSG00000012822	CALCOCO1	8898	12	53708517	53727745	calcium binding and coiled-coil domain 1 [Source:HGNC Symbol;Acc:HGNC:29306]	667	642	980	569
ENSG00000012963	UBR7	3509	14	93207241	93229215	ubiquitin protein ligase E3 component n-recognin 7 [Source:HGNC Symbol;Acc:HGNC:20344]	998	1111	909	926
ENSG00000012983	MAP4K5	7580	14	50418501	50561126	mitogen-activated protein kinase kinase kinase kinase 5 [Source:HGNC Symbol;Acc:HGNC:6867]	1235	1143	1423	1150
ENSG00000013016	EHD3	4825	2	31234152	31269451	EH domain containing 3 [Source:HGNC Symbol;Acc:HGNC:3244]	224	210	215	254
ENSG00000013275	PSMC4	2550	19	39971165	39981764	proteasome 26S subunit, ATPase 4 [Source:HGNC Symbol;Acc:HGNC:9551]	4644	4785	7683	7798
ENSG00000013288	MAN2B2	8884	4	6575189	6623362	mannosidase alpha class 2B member 2 [Source:HGNC Symbol;Acc:HGNC:29623]	1538	1531	1145	1085
ENSG00000013297	CLDN11	4321	3	170418868	170454733	claudin 11 [Source:HGNC Symbol;Acc:HGNC:8514]	48	66	20	21
ENSG00000013306	SLC25A39	3526	17	44319625	44324870	solute carrier family 25 member 39 [Source:HGNC Symbol;Acc:HGNC:24279]	4054	3898	6423	6365
ENSG00000013364	MVP	6141	16	29820394	29848039	major vault protein [Source:HGNC Symbol;Acc:HGNC:7531]	4025	4013	3230	5017
ENSG00000013374	NUB1	5338	7	151341772	151378449	negative regulator of ubiquitin like proteins 1 [Source:HGNC Symbol;Acc:HGNC:17623]	2495	2455	1684	1976
ENSG00000013375	PGM3	22007	6	83147324	83193936	phosphoglucomutase 3 [Source:HGNC Symbol;Acc:HGNC:8907]	3309	3168	3088	2805
ENSG00000013392	RWDD2A	3769	6	83193357	83198935	RWD domain containing 2A [Source:HGNC Symbol;Acc:HGNC:21385]	286	207	369	362
ENSG00000013441	CLK1	5117	2	200853009	200864691	CDC like kinase 1 [Source:HGNC Symbol;Acc:HGNC:2068]	389	396	805	483
ENSG00000013503	POLR3B	4768	12	106357748	106510198	RNA polymerase III subunit B [Source:HGNC Symbol;Acc:HGNC:30348]	721	782	654	613
ENSG00000013523	ANGEL1	6525	14	76786009	76826246	angel homolog 1 [Source:HGNC Symbol;Acc:HGNC:19961]	759	639	595	487
ENSG00000013561	RNF14	4988	5	141958328	141990292	ring finger protein 14 [Source:HGNC Symbol;Acc:HGNC:10058]	3399	3484	2122	2636
ENSG00000013563	DNASE1L1	4132	X	154401236	154412112	deoxyribonuclease 1 like 1 [Source:HGNC Symbol;Acc:HGNC:2957]	711	739	443	529
ENSG00000013573	DDX11	8367	12	31073860	31104799	DEAD/H-box helicase 11 [Source:HGNC Symbol;Acc:HGNC:2736]	1128	1040	1652	1241
ENSG00000013583	HEBP1	3428	12	12974870	13000265	heme binding protein 1 [Source:HGNC Symbol;Acc:HGNC:17176]	679	666	785	986
ENSG00000013588	GPRC5A	7663	12	12891559	12917937	G protein-coupled receptor class C group 5 member A [Source:HGNC Symbol;Acc:HGNC:9836]	7815	7659	4551	4386
ENSG00000013619	MAMLD1	6664	X	150361422	150514178	mastermind like domain containing 1 [Source:HGNC Symbol;Acc:HGNC:2568]	572	517	502	525
ENSG00000013725	CD6	5958	11	60971680	61020377	CD6 molecule [Source:HGNC Symbol;Acc:HGNC:1691]	16	7	4	8
ENSG00000013810	TACC3	8825	4	1712858	1745171	transforming acidic coiled-coil containing protein 3 [Source:HGNC Symbol;Acc:HGNC:11524]	2926	3049	3329	3701
ENSG00000014123	UFL1	4539	6	96521595	96555276	UFM1 specific ligase 1 [Source:HGNC Symbol;Acc:HGNC:23039]	2039	2132	1353	1111
ENSG00000014138	POLA2	12006	11	65261913	65305959	DNA polymerase alpha 2, accessory subunit [Source:HGNC Symbol;Acc:HGNC:30073]	351	406	491	551
ENSG00000014164	ZC3H3	3721	8	143437659	143541447	zinc finger CCCH-type containing 3 [Source:HGNC Symbol;Acc:HGNC:28972]	1240	1241	1015	1439
ENSG00000014216	CAPN1	7506	11	65180566	65212006	calpain 1 [Source:HGNC Symbol;Acc:HGNC:1476]	28748	29372	20183	30010
ENSG00000014257	ACP3	4284	3	132317369	132368302	acid phosphatase 3 [Source:HGNC Symbol;Acc:HGNC:125]	210	214	88	105
ENSG00000014641	MDH1	4990	2	63588609	63607197	malate dehydrogenase 1 [Source:HGNC Symbol;Acc:HGNC:6970]	5790	5565	6917	7183
ENSG00000014824	SLC30A9	7199	4	41990502	42090461	solute carrier family 30 member 9 [Source:HGNC Symbol;Acc:HGNC:1329]	3206	3017	2611	2843
ENSG00000014914	MTMR11	4572	1	149928651	149936879	myotubularin related protein 11 [Source:HGNC Symbol;Acc:HGNC:24307]	228	251	342	202
ENSG00000014919	COX15	5215	10	99710868	99732127	cytochrome c oxidase assembly homolog COX15 [Source:HGNC Symbol;Acc:HGNC:2263]	1025	954	654	721
ENSG00000015133	CCDC88C	12426	14	91271323	91417844	coiled-coil domain containing 88C [Source:HGNC Symbol;Acc:HGNC:19967]	1853	1861	1779	1598
ENSG00000015153	YAF2	10839	12	42157104	42238349	YY1 associated factor 2 [Source:HGNC Symbol;Acc:HGNC:17363]	711	667	595	564
ENSG00000015171	ZMYND11	12925	10	130088	254637	zinc finger MYND-type containing 11 [Source:HGNC Symbol;Acc:HGNC:16966]	4828	4871	4374	3752
ENSG00000015285	WAS	3402	X	48676596	48691431	WASP actin nucleation promoting factor [Source:HGNC Symbol;Acc:HGNC:12731]	14	12	15	4
ENSG00000015475	BID	4420	22	17734138	17774770	BH3 interacting domain death agonist [Source:HGNC Symbol;Acc:HGNC:1050]	3685	3716	4327	4887
ENSG00000015479	MATR3	12064	5	139293674	139331677	matrin 3 [Source:HGNC Symbol;Acc:HGNC:6912]	61	41	90	42
ENSG00000015520	NPC1L1	5267	7	44512535	44541330	NPC1 like intracellular cholesterol transporter 1 [Source:HGNC Symbol;Acc:HGNC:7898]	0	6	0	0
ENSG00000015532	XYLT2	5472	17	50346126	50363138	xylosyltransferase 2 [Source:HGNC Symbol;Acc:HGNC:15517]	1564	1414	1073	1380
ENSG00000015568	RGPD5	14185	2	109792758	109857705	RANBP2 like and GRIP domain containing 5 [Source:HGNC Symbol;Acc:HGNC:32418]	33	39	45	16
ENSG00000015592	STMN4	3309	8	27235308	27258420	stathmin 4 [Source:HGNC Symbol;Acc:HGNC:16078]	0	3	1	0
ENSG00000015676	NUDCD3	9893	7	44379119	44490658	NudC domain containing 3 [Source:HGNC Symbol;Acc:HGNC:22208]	6066	6391	3221	3788
ENSG00000016391	CHDH	7787	3	53812335	53846419	choline dehydrogenase [Source:HGNC Symbol;Acc:HGNC:24288]	384	453	735	512
ENSG00000016402	IL20RA	4730	6	136999971	137045180	interleukin 20 receptor subunit alpha [Source:HGNC Symbol;Acc:HGNC:6003]	451	566	867	1164
ENSG00000016864	GLT8D1	3785	3	52694486	52706032	glycosyltransferase 8 domain containing 1 [Source:HGNC Symbol;Acc:HGNC:24870]	507	559	749	779
ENSG00000017260	ATP2C1	8510	3	130850595	131016712	ATPase secretory pathway Ca2+ transporting 1 [Source:HGNC Symbol;Acc:HGNC:13211]	4417	4243	4339	4244
ENSG00000017483	SLC38A5	4017	X	48458537	48470260	solute carrier family 38 member 5 [Source:HGNC Symbol;Acc:HGNC:18070]	3	15	4	11
ENSG00000017797	RALBP1	8041	18	9475009	9538114	ralA binding protein 1 [Source:HGNC Symbol;Acc:HGNC:9841]	5524	5360	10015	12332
ENSG00000018189	RUFY3	9405	4	70704204	70808619	RUN and FYVE domain containing 3 [Source:HGNC Symbol;Acc:HGNC:30285]	1471	1302	1096	1090
ENSG00000018280	SLC11A1	8676	2	218382029	218396894	solute carrier family 11 member 1 [Source:HGNC Symbol;Acc:HGNC:10907]	4	6	8	8
ENSG00000018408	WWTR1	8353	3	149517235	149736714	WW domain containing transcription regulator 1 [Source:HGNC Symbol;Acc:HGNC:24042]	4120	4232	3324	3561
ENSG00000018510	AGPS	15223	2	177392746	177567024	alkylglycerone phosphate synthase [Source:HGNC Symbol;Acc:HGNC:327]	4368	4252	3196	2853
ENSG00000018610	STEEP1	2581	X	119538149	119565409	STING1 ER exit protein 1 [Source:HGNC Symbol;Acc:HGNC:26239]	1350	1210	1226	1423
ENSG00000018625	ATP1A2	6298	1	160115759	160143591	ATPase Na+/K+ transporting subunit alpha 2 [Source:HGNC Symbol;Acc:HGNC:800]	15	10	3	0
ENSG00000018699	TTC27	3443	2	32628032	32821051	tetratricopeptide repeat domain 27 [Source:HGNC Symbol;Acc:HGNC:25986]	1281	1309	877	1289
ENSG00000018869	ZNF582	3341	19	56375846	56393538	zinc finger protein 582 [Source:HGNC Symbol;Acc:HGNC:26421]	100	88	60	86
ENSG00000019102	VSIG2	1447	11	124747474	124752255	V-set and immunoglobulin domain containing 2 [Source:HGNC Symbol;Acc:HGNC:17149]	6	0	1	0
ENSG00000019144	PHLDB1	21691	11	118606440	118658031	pleckstrin homology like domain family B member 1 [Source:HGNC Symbol;Acc:HGNC:23697]	1878	1854	857	679
ENSG00000019169	MARCO	2051	2	118942194	118994660	macrophage receptor with collagenous structure [Source:HGNC Symbol;Acc:HGNC:6895]	13	8	27	48
ENSG00000019186	CYP24A1	3988	20	54153446	54173986	cytochrome P450 family 24 subfamily A member 1 [Source:HGNC Symbol;Acc:HGNC:2602]	10	17	31	23
ENSG00000019485	PRDM11	13976	11	45095806	45235110	PR/SET domain 11 [Source:HGNC Symbol;Acc:HGNC:13996]	68	89	106	128
ENSG00000019505	SYT13	5445	11	45240302	45286341	synaptotagmin 13 [Source:HGNC Symbol;Acc:HGNC:14962]	2	8	0	0
ENSG00000019582	CD74	4526	5	150401637	150412969	CD74 molecule [Source:HGNC Symbol;Acc:HGNC:1697]	2	1	14	6
ENSG00000019991	HGF	9753	7	81699010	81770438	hepatocyte growth factor [Source:HGNC Symbol;Acc:HGNC:4893]	1	6	0	0
ENSG00000019995	ZRANB1	5993	10	124942123	124988189	zinc finger RANBP2-type containing 1 [Source:HGNC Symbol;Acc:HGNC:18224]	1108	1307	956	941
ENSG00000020129	NCDN	4917	1	35557473	35567274	neurochondrin [Source:HGNC Symbol;Acc:HGNC:17597]	2074	2518	2212	2319
ENSG00000020181	ADGRA2	7084	8	37784191	37844896	adhesion G protein-coupled receptor A2 [Source:HGNC Symbol;Acc:HGNC:17849]	105	153	72	87
ENSG00000020219	CCT8L1P	1674	7	152445477	152447150	chaperonin containing TCP1 subunit 8 like 1, pseudogene [Source:HGNC Symbol;Acc:HGNC:32153]	0	0	1	0
ENSG00000020256	ZFP64	6790	20	52051663	52204308	ZFP64 zinc finger protein [Source:HGNC Symbol;Acc:HGNC:15940]	1150	1180	1458	1581
ENSG00000020426	MNAT1	3877	14	60734742	60969965	MNAT1 component of CDK activating kinase [Source:HGNC Symbol;Acc:HGNC:7181]	641	552	585	637
ENSG00000020577	SAMD4A	12333	14	54566117	54793315	sterile alpha motif domain containing 4A [Source:HGNC Symbol;Acc:HGNC:23023]	4820	4060	1978	1602
ENSG00000020633	RUNX3	4922	1	24899511	24965121	RUNX family transcription factor 3 [Source:HGNC Symbol;Acc:HGNC:10473]	2214	2313	2447	3145
ENSG00000020922	MRE11	7674	11	94415570	94493885	MRE11 homolog, double strand break repair nuclease [Source:HGNC Symbol;Acc:HGNC:7230]	1059	1006	830	804
ENSG00000021300	PLEKHB1	4933	11	73646178	73662819	pleckstrin homology domain containing B1 [Source:HGNC Symbol;Acc:HGNC:19079]	0	8	2	10
ENSG00000021355	SERPINB1	3047	6	2832332	2841959	serpin family B member 1 [Source:HGNC Symbol;Acc:HGNC:3311]	4066	3828	3699	4046
ENSG00000021488	SLC7A9	2598	19	32830509	32869767	solute carrier family 7 member 9 [Source:HGNC Symbol;Acc:HGNC:11067]	2	5	0	5
ENSG00000021574	SPAST	9488	2	32063556	32157637	spastin [Source:HGNC Symbol;Acc:HGNC:11233]	2932	2736	2429	2573
ENSG00000021645	NRXN3	15534	14	78170373	79868291	neurexin 3 [Source:HGNC Symbol;Acc:HGNC:8010]	0	0	0	0
ENSG00000021762	OSBPL5	7473	11	3087107	3166739	oxysterol binding protein like 5 [Source:HGNC Symbol;Acc:HGNC:16392]	2506	2393	1927	1416
ENSG00000021776	AQR	13431	15	34851782	34969742	aquarius intron-binding spliceosomal factor [Source:HGNC Symbol;Acc:HGNC:29513]	2165	2174	1759	1617
ENSG00000021826	CPS1	11018	2	210477682	210679107	carbamoyl-phosphate synthase 1 [Source:HGNC Symbol;Acc:HGNC:2323]	18	12	4	6
ENSG00000022267	FHL1	5862	X	136146702	136211359	four and a half LIM domains 1 [Source:HGNC Symbol;Acc:HGNC:3702]	61	43	34	48
ENSG00000022277	RTF2	4063	20	56468585	56519449	replication termination factor 2 [Source:HGNC Symbol;Acc:HGNC:15890]	2738	2607	2455	3112
ENSG00000022355	GABRA1	8420	5	161847063	161899981	gamma-aminobutyric acid type A receptor subunit alpha1 [Source:HGNC Symbol;Acc:HGNC:4075]	0	0	0	0
ENSG00000022556	NLRP2	6313	19	54953130	55001142	NLR family pyrin domain containing 2 [Source:HGNC Symbol;Acc:HGNC:22948]	5973	5985	3979	4747
ENSG00000022567	SLC45A4	8608	8	141207166	141308305	solute carrier family 45 member 4 [Source:HGNC Symbol;Acc:HGNC:29196]	912	982	978	1040
ENSG00000022840	RNF10	5900	12	120533480	120577588	ring finger protein 10 [Source:HGNC Symbol;Acc:HGNC:10055]	6299	6412	5428	7550
ENSG00000022976	ZNF839	5595	14	102317377	102342702	zinc finger protein 839 [Source:HGNC Symbol;Acc:HGNC:20345]	212	221	269	257
ENSG00000023041	ZDHHC6	9250	10	112424428	112447572	zinc finger DHHC-type palmitoyltransferase 6 [Source:HGNC Symbol;Acc:HGNC:19160]	1540	1581	1683	1318
ENSG00000023171	GRAMD1B	14932	11	123358428	123627774	GRAM domain containing 1B [Source:HGNC Symbol;Acc:HGNC:29214]	1349	1359	1340	1353
ENSG00000023191	RNH1	7374	11	494512	507300	ribonuclease/angiogenin inhibitor 1 [Source:HGNC Symbol;Acc:HGNC:10074]	5304	5549	5822	7993
ENSG00000023228	NDUFS1	12174	2	206114817	206159509	NADH:ubiquinone oxidoreductase core subunit S1 [Source:HGNC Symbol;Acc:HGNC:7707]	3423	3295	3179	3310
ENSG00000023287	RB1CC1	7613	8	52622458	52745843	RB1 inducible coiled-coil 1 [Source:HGNC Symbol;Acc:HGNC:15574]	3929	3973	3604	3041
ENSG00000023318	ERP44	14212	9	99979185	100099052	endoplasmic reticulum protein 44 [Source:HGNC Symbol;Acc:HGNC:18311]	1561	1394	1504	1812
ENSG00000023330	ALAS1	2536	3	52198086	52214327	5'-aminolevulinate synthase 1 [Source:HGNC Symbol;Acc:HGNC:396]	2160	2067	2189	2510
ENSG00000023445	BIRC3	7484	11	102317484	102339403	baculoviral IAP repeat containing 3 [Source:HGNC Symbol;Acc:HGNC:591]	5141	4690	3792	3108
ENSG00000023516	AKAP11	9915	13	42272152	42323261	A-kinase anchoring protein 11 [Source:HGNC Symbol;Acc:HGNC:369]	2700	2803	1879	1117
ENSG00000023572	GLRX2	6210	1	193090866	193106114	glutaredoxin 2 [Source:HGNC Symbol;Acc:HGNC:16065]	731	791	905	906
ENSG00000023608	SNAPC1	2593	14	61762420	61796428	small nuclear RNA activating complex polypeptide 1 [Source:HGNC Symbol;Acc:HGNC:11134]	238	187	170	251
ENSG00000023697	DERA	2813	12	15911302	16037381	deoxyribose-phosphate aldolase [Source:HGNC Symbol;Acc:HGNC:24269]	1322	1272	1185	1354
ENSG00000023734	STRAP	2215	12	15882387	15903478	serine/threonine kinase receptor associated protein [Source:HGNC Symbol;Acc:HGNC:30796]	6575	6631	6443	8087
ENSG00000023839	ABCC2	7837	10	99782640	99852594	ATP binding cassette subfamily C member 2 [Source:HGNC Symbol;Acc:HGNC:53]	674	505	563	390
ENSG00000023892	DEF6	5066	6	35297818	35321771	DEF6 guanine nucleotide exchange factor [Source:HGNC Symbol;Acc:HGNC:2760]	55	51	47	51
ENSG00000023902	PLEKHO1	6629	1	150149183	150164720	pleckstrin homology domain containing O1 [Source:HGNC Symbol;Acc:HGNC:24310]	219	245	362	629
ENSG00000023909	GCLM	5426	1	93885199	93909456	glutamate-cysteine ligase modifier subunit [Source:HGNC Symbol;Acc:HGNC:4312]	8768	8733	13588	14547
ENSG00000024048	UBR2	8874	6	42564029	42693505	ubiquitin protein ligase E3 component n-recognin 2 [Source:HGNC Symbol;Acc:HGNC:21289]	4476	4353	2944	2612
ENSG00000024422	EHD2	3844	19	47713422	47743134	EH domain containing 2 [Source:HGNC Symbol;Acc:HGNC:3243]	193	224	223	246
ENSG00000024526	DEPDC1	5904	1	68474152	68497221	DEP domain containing 1 [Source:HGNC Symbol;Acc:HGNC:22949]	1863	1884	2240	1971
ENSG00000024862	CCDC28A	1247	6	138773769	138793319	coiled-coil domain containing 28A [Source:HGNC Symbol;Acc:HGNC:21098]	436	416	500	382
ENSG00000025039	RRAGD	5095	6	89364616	89412273	Ras related GTP binding D [Source:HGNC Symbol;Acc:HGNC:19903]	1353	1360	1678	1802
ENSG00000025156	HSF2	2697	6	122399551	122433119	heat shock transcription factor 2 [Source:HGNC Symbol;Acc:HGNC:5225]	845	964	882	932
ENSG00000025293	PHF20	8372	20	35771974	35950370	PHD finger protein 20 [Source:HGNC Symbol;Acc:HGNC:16098]	2548	2489	2498	2057
ENSG00000025423	HSD17B6	2272	12	56752161	56787790	hydroxysteroid 17-beta dehydrogenase 6 [Source:HGNC Symbol;Acc:HGNC:23316]	85	55	69	39
ENSG00000025434	NR1H3	4534	11	47248300	47269033	nuclear receptor subfamily 1 group H member 3 [Source:HGNC Symbol;Acc:HGNC:7966]	572	578	546	703
ENSG00000025708	TYMP	3600	22	50525752	50530032	thymidine phosphorylase [Source:HGNC Symbol;Acc:HGNC:3148]	187	125	246	261
ENSG00000025770	NCAPH2	4459	22	50508224	50524780	non-SMC condensin II complex subunit H2 [Source:HGNC Symbol;Acc:HGNC:25071]	3227	3289	2991	4542
ENSG00000025772	TOMM34	1973	20	44942130	44960397	translocase of outer mitochondrial membrane 34 [Source:HGNC Symbol;Acc:HGNC:15746]	860	918	1787	2133
ENSG00000025796	SEC63	8606	6	107867756	107958208	SEC63 homolog, protein translocation regulator [Source:HGNC Symbol;Acc:HGNC:21082]	8321	8628	7432	9277
ENSG00000025800	KPNA6	7457	1	32108056	32176563	karyopherin subunit alpha 6 [Source:HGNC Symbol;Acc:HGNC:6399]	7314	7555	6092	6536
ENSG00000026025	VIM	5176	10	17228241	17237593	vimentin [Source:HGNC Symbol;Acc:HGNC:12692]	62	38	90	96
ENSG00000026036	RTEL1-TNFRSF6B	9093	20	63659300	63698684	RTEL1-TNFRSF6B readthrough (NMD candidate) [Source:HGNC Symbol;Acc:HGNC:44095]	95	51	225	121
ENSG00000026103	FAS	29313	10	88953813	89029605	Fas cell surface death receptor [Source:HGNC Symbol;Acc:HGNC:11920]	90	41	113	95
ENSG00000026297	RNASET2	19532	6	166922113	166957191	ribonuclease T2 [Source:HGNC Symbol;Acc:HGNC:21686]	336	355	626	635
ENSG00000026508	CD44	9992	11	35138882	35232402	CD44 molecule (Indian blood group) [Source:HGNC Symbol;Acc:HGNC:1681]	44797	42789	47331	51494
ENSG00000026559	KCNG1	5415	20	51003656	51023107	potassium voltage-gated channel modifier subfamily G member 1 [Source:HGNC Symbol;Acc:HGNC:6248]	673	631	1049	1181
ENSG00000026652	AGPAT4	14253	6	161129967	161274061	1-acylglycerol-3-phosphate O-acyltransferase 4 [Source:HGNC Symbol;Acc:HGNC:20885]	10	15	14	8
ENSG00000026751	SLAMF7	4833	1	160739057	160754821	SLAM family member 7 [Source:HGNC Symbol;Acc:HGNC:21394]	49	25	18	12
ENSG00000026950	BTN3A1	5539	6	26402237	26415208	butyrophilin subfamily 3 member A1 [Source:HGNC Symbol;Acc:HGNC:1138]	566	585	758	754
ENSG00000027001	MIPEP	3388	13	23730189	23889400	mitochondrial intermediate peptidase [Source:HGNC Symbol;Acc:HGNC:7104]	669	605	726	945
ENSG00000027075	PRKCH	8947	14	61187559	61550976	protein kinase C eta [Source:HGNC Symbol;Acc:HGNC:9403]	1050	918	774	893
ENSG00000027644	INSRR	5200	1	156840063	156859117	insulin receptor related receptor [Source:HGNC Symbol;Acc:HGNC:6093]	1	8	0	0
ENSG00000027697	IFNGR1	3549	6	137197483	137219449	interferon gamma receptor 1 [Source:HGNC Symbol;Acc:HGNC:5439]	10087	9520	11737	9905
ENSG00000027847	B4GALT7	4878	5	177600132	177610330	beta-1,4-galactosyltransferase 7 [Source:HGNC Symbol;Acc:HGNC:930]	770	762	1076	1147
ENSG00000027869	SH2D2A	2498	1	156806243	156816848	SH2 domain containing 2A [Source:HGNC Symbol;Acc:HGNC:10821]	22	25	59	23
ENSG00000028116	VRK2	3531	2	57907629	58159920	VRK serine/threonine kinase 2 [Source:HGNC Symbol;Acc:HGNC:12719]	1072	1073	887	931
ENSG00000028137	TNFRSF1B	3778	1	12166991	12209228	TNF receptor superfamily member 1B [Source:HGNC Symbol;Acc:HGNC:11917]	0	9	13	1
ENSG00000028203	VEZT	8766	12	95217746	95302799	vezatin, adherens junctions transmembrane protein [Source:HGNC Symbol;Acc:HGNC:18258]	1971	1754	1589	1538
ENSG00000028277	POU2F2	9072	19	42086110	42196585	POU class 2 homeobox 2 [Source:HGNC Symbol;Acc:HGNC:9213]	84	71	53	69
ENSG00000028310	BRD9	9549	5	850291	892801	bromodomain containing 9 [Source:HGNC Symbol;Acc:HGNC:25818]	2472	2275	4055	2876
ENSG00000028528	SNX1	9789	15	64094123	64146090	sorting nexin 1 [Source:HGNC Symbol;Acc:HGNC:11172]	1995	1951	1868	1790
ENSG00000028839	TBPL1	5039	6	133952170	133990432	TATA-box binding protein like 1 [Source:HGNC Symbol;Acc:HGNC:11589]	479	414	525	536
ENSG00000029153	BMAL2	7001	12	27332836	27425289	basic helix-loop-helix ARNT like 2 [Source:HGNC Symbol;Acc:HGNC:18984]	3294	2672	1204	1402
ENSG00000029363	BCLAF1	9533	6	136256627	136289851	BCL2 associated transcription factor 1 [Source:HGNC Symbol;Acc:HGNC:16863]	10964	11515	9115	8760
ENSG00000029364	SLC39A9	7138	14	69398015	69462390	solute carrier family 39 member 9 [Source:HGNC Symbol;Acc:HGNC:20182]	3046	2440	2282	2305
ENSG00000029534	ANK1	10996	8	41653220	41896741	ankyrin 1 [Source:HGNC Symbol;Acc:HGNC:492]	83	43	53	74
ENSG00000029639	TFB1M	4111	6	155256134	155314493	transcription factor B1, mitochondrial [Source:HGNC Symbol;Acc:HGNC:17037]	201	221	391	312
ENSG00000029725	RABEP1	7059	17	5282265	5386340	rabaptin, RAB GTPase binding effector protein 1 [Source:HGNC Symbol;Acc:HGNC:17677]	1116	1298	1066	1004
ENSG00000029993	HMGB3	3914	X	150980509	150990771	high mobility group box 3 [Source:HGNC Symbol;Acc:HGNC:5004]	3458	3477	6177	6198
ENSG00000030066	NUP160	8576	11	47778087	47848555	nucleoporin 160 [Source:HGNC Symbol;Acc:HGNC:18017]	3871	3833	3658	3085
ENSG00000030110	BAK1	2212	6	33572547	33580293	BCL2 antagonist/killer 1 [Source:HGNC Symbol;Acc:HGNC:949]	2305	2287	2329	3082
ENSG00000030304	MUSK	9176	9	110668779	110806558	muscle associated receptor tyrosine kinase [Source:HGNC Symbol;Acc:HGNC:7525]	4	4	6	0
ENSG00000030419	IKZF2	12243	2	212999691	213152427	IKAROS family zinc finger 2 [Source:HGNC Symbol;Acc:HGNC:13177]	458	445	178	132
ENSG00000030582	GRN	3524	17	44345246	44353106	granulin precursor [Source:HGNC Symbol;Acc:HGNC:4601]	5087	5612	6283	7620
ENSG00000031003	FAM13B	6808	5	137937960	138051961	family with sequence similarity 13 member B [Source:HGNC Symbol;Acc:HGNC:1335]	4994	4992	2676	2608
ENSG00000031081	ARHGAP31	9374	3	119294383	119420714	Rho GTPase activating protein 31 [Source:HGNC Symbol;Acc:HGNC:29216]	1317	1201	749	732
ENSG00000031691	CENPQ	1741	6	49463370	49493107	centromere protein Q [Source:HGNC Symbol;Acc:HGNC:21347]	636	620	563	465
ENSG00000031698	SARS1	3849	1	109213918	109238182	seryl-tRNA synthetase 1 [Source:HGNC Symbol;Acc:HGNC:10537]	6083	5960	7568	8876
ENSG00000031823	RANBP3	7445	19	5916139	5978142	RAN binding protein 3 [Source:HGNC Symbol;Acc:HGNC:9850]	1975	2094	2059	2214
ENSG00000032219	ARID4A	7449	14	58298504	58373887	AT-rich interaction domain 4A [Source:HGNC Symbol;Acc:HGNC:9885]	1349	1225	1088	813
ENSG00000032389	EIPR1	5723	2	3188925	3377830	EARP complex and GARP complex interacting protein 1 [Source:HGNC Symbol;Acc:HGNC:12383]	1363	1432	2054	2444
ENSG00000032444	PNPLA6	7161	19	7534004	7561764	patatin like phospholipase domain containing 6 [Source:HGNC Symbol;Acc:HGNC:16268]	4868	5267	3809	5919
ENSG00000032742	IFT88	6049	13	20567138	20691444	intraflagellar transport 88 [Source:HGNC Symbol;Acc:HGNC:20606]	404	411	368	356
ENSG00000033011	ALG1	10637	16	5033702	5087379	ALG1 chitobiosyldiphosphodolichol beta-mannosyltransferase [Source:HGNC Symbol;Acc:HGNC:18294]	729	584	522	659
ENSG00000033030	ZCCHC8	8981	12	122471600	122500932	zinc finger CCHC-type containing 8 [Source:HGNC Symbol;Acc:HGNC:25265]	1092	917	1256	1058
ENSG00000033050	ABCF2	5158	7	151211484	151227205	ATP binding cassette subfamily F member 2 [Source:HGNC Symbol;Acc:HGNC:71]	1104	1070	1260	1906
ENSG00000033100	CHPF2	6498	7	151232483	151240979	chondroitin polymerizing factor 2 [Source:HGNC Symbol;Acc:HGNC:29270]	2318	2161	2427	2535
ENSG00000033122	LRRC7	30043	1	69567922	70151945	leucine rich repeat containing 7 [Source:HGNC Symbol;Acc:HGNC:18531]	16	17	22	10
ENSG00000033170	FUT8	6976	14	65410592	65744121	fucosyltransferase 8 [Source:HGNC Symbol;Acc:HGNC:4019]	546	516	677	626
ENSG00000033178	UBA6	11408	4	67612652	67701155	ubiquitin like modifier activating enzyme 6 [Source:HGNC Symbol;Acc:HGNC:25581]	2538	2777	2371	2363
ENSG00000033327	GAB2	6775	11	78215293	78418348	GRB2 associated binding protein 2 [Source:HGNC Symbol;Acc:HGNC:14458]	5281	5182	2764	3278
ENSG00000033627	ATP6V0A1	12938	17	42458844	42522582	ATPase H+ transporting V0 subunit a1 [Source:HGNC Symbol;Acc:HGNC:865]	2339	2192	1547	1782
ENSG00000033800	PIAS1	10647	15	68054309	68198603	protein inhibitor of activated STAT 1 [Source:HGNC Symbol;Acc:HGNC:2752]	1140	1151	992	785
ENSG00000033867	SLC4A7	9616	3	27372721	27484420	solute carrier family 4 member 7 [Source:HGNC Symbol;Acc:HGNC:11033]	2084	1953	1652	1346
ENSG00000034152	MAP2K3	3775	17	21284672	21315232	mitogen-activated protein kinase kinase 3 [Source:HGNC Symbol;Acc:HGNC:6843]	2179	1930	2826	3291
ENSG00000034510	TMSB10	461	2	84905656	84906671	thymosin beta 10 [Source:HGNC Symbol;Acc:HGNC:11879]	11457	9629	18725	12518
ENSG00000034533	ASTE1	3427	3	131013875	131027649	asteroid homolog 1 [Source:HGNC Symbol;Acc:HGNC:25021]	167	146	169	209
ENSG00000034677	RNF19A	5852	8	100257060	100336218	ring finger protein 19A, RBR E3 ubiquitin protein ligase [Source:HGNC Symbol;Acc:HGNC:13432]	3280	3119	2263	2107
ENSG00000034693	PEX3	2830	6	143450805	143490616	peroxisomal biogenesis factor 3 [Source:HGNC Symbol;Acc:HGNC:8858]	489	443	636	713
ENSG00000034713	GABARAPL2	3010	16	75566375	75577881	GABA type A receptor associated protein like 2 [Source:HGNC Symbol;Acc:HGNC:13291]	1662	1454	1891	2042
ENSG00000035115	SH3YL1	11132	2	217730	266398	SH3 and SYLF domain containing 1 [Source:HGNC Symbol;Acc:HGNC:29546]	2045	2098	2023	1814
ENSG00000035141	FAM136A	3062	2	70295976	70302067	family with sequence similarity 136 member A [Source:HGNC Symbol;Acc:HGNC:25911]	3968	3745	3413	3357
ENSG00000035403	VCL	9992	10	73995193	74121363	vinculin [Source:HGNC Symbol;Acc:HGNC:12665]	28532	27850	12684	11147
ENSG00000035499	DEPDC1B	3806	5	60596912	60700190	DEP domain containing 1B [Source:HGNC Symbol;Acc:HGNC:24902]	426	443	655	631
ENSG00000035664	DAPK2	13661	15	63907036	64072033	death associated protein kinase 2 [Source:HGNC Symbol;Acc:HGNC:2675]	165	127	165	200
ENSG00000035681	NSMAF	6170	8	58583508	58659853	neutral sphingomyelinase activation associated factor [Source:HGNC Symbol;Acc:HGNC:8017]	894	1031	962	921
ENSG00000035687	ADSS2	3441	1	244408494	244451909	adenylosuccinate synthase 2 [Source:HGNC Symbol;Acc:HGNC:292]	3521	3315	3315	3174
ENSG00000035720	STAP1	1951	4	67558727	67607337	signal transducing adaptor family member 1 [Source:HGNC Symbol;Acc:HGNC:24133]	0	0	2	0
ENSG00000035862	TIMP2	6209	17	78852977	78925387	TIMP metallopeptidase inhibitor 2 [Source:HGNC Symbol;Acc:HGNC:11821]	1635	1371	910	1194
ENSG00000035928	RFC1	6713	4	39287456	39366375	replication factor C subunit 1 [Source:HGNC Symbol;Acc:HGNC:9969]	3524	3679	3033	3070
ENSG00000036054	TBC1D23	5176	3	100260992	100325251	TBC1 domain family member 23 [Source:HGNC Symbol;Acc:HGNC:25622]	1912	1689	1358	1415
ENSG00000036257	CUL3	11505	2	224470150	224585397	cullin 3 [Source:HGNC Symbol;Acc:HGNC:2553]	3457	3498	3357	3659
ENSG00000036530	CYP46A1	9358	14	99684298	99727301	cytochrome P450 family 46 subfamily A member 1 [Source:HGNC Symbol;Acc:HGNC:2641]	0	0	2	0
ENSG00000036549	ZZZ3	9008	1	77562416	77683419	zinc finger ZZ-type containing 3 [Source:HGNC Symbol;Acc:HGNC:24523]	4039	3893	3708	3656
ENSG00000036672	USP2	4523	11	119355215	119381711	ubiquitin specific peptidase 2 [Source:HGNC Symbol;Acc:HGNC:12618]	250	238	180	263
ENSG00000037042	TUBG2	2793	17	42659284	42667006	tubulin gamma 2 [Source:HGNC Symbol;Acc:HGNC:12419]	324	352	548	414
ENSG00000037241	RPL26L1	1164	5	172958729	172969771	ribosomal protein L26 like 1 [Source:HGNC Symbol;Acc:HGNC:17050]	967	832	1057	988
ENSG00000037474	NSUN2	5506	5	6599239	6633291	NOP2/Sun RNA methyltransferase 2 [Source:HGNC Symbol;Acc:HGNC:25994]	7795	7481	9162	8765
ENSG00000037637	FBXO42	9009	1	16246840	16352480	F-box protein 42 [Source:HGNC Symbol;Acc:HGNC:29249]	1004	1122	913	951
ENSG00000037749	MFAP3	10159	5	154038959	154220478	microfibril associated protein 3 [Source:HGNC Symbol;Acc:HGNC:7034]	2142	2036	1976	1774
ENSG00000037757	MRI1	3466	19	13764522	13774282	methylthioribose-1-phosphate isomerase 1 [Source:HGNC Symbol;Acc:HGNC:28469]	1559	1480	1569	1736
ENSG00000037897	METTL1	1947	12	57768471	57772119	methyltransferase 1, tRNA methylguanosine [Source:HGNC Symbol;Acc:HGNC:7030]	186	155	332	380
ENSG00000037965	HOXC8	2417	12	54008985	54012769	homeobox C8 [Source:HGNC Symbol;Acc:HGNC:5129]	34	26	19	16
ENSG00000038002	AGA	2605	4	177430774	177442437	aspartylglucosaminidase [Source:HGNC Symbol;Acc:HGNC:318]	1287	1352	1116	1348
ENSG00000038210	PI4K2B	3685	4	25160663	25279204	phosphatidylinositol 4-kinase type 2 beta [Source:HGNC Symbol;Acc:HGNC:18215]	2282	2403	1675	1866
ENSG00000038219	BOD1L1	15862	4	13568738	13627725	biorientation of chromosomes in cell division 1 like 1 [Source:HGNC Symbol;Acc:HGNC:31792]	2998	2993	2577	1412
ENSG00000038274	MAT2B	8700	5	163503114	163519558	methionine adenosyltransferase 2B [Source:HGNC Symbol;Acc:HGNC:6905]	3549	3936	3203	3562
ENSG00000038295	TLL1	8105	4	165873237	166104457	tolloid like 1 [Source:HGNC Symbol;Acc:HGNC:11843]	0	0	0	0
ENSG00000038358	EDC4	6140	16	67873052	67884499	enhancer of mRNA decapping 4 [Source:HGNC Symbol;Acc:HGNC:17157]	2839	2906	2335	2409
ENSG00000038382	TRIO	19917	5	14143342	14532128	trio Rho guanine nucleotide exchange factor [Source:HGNC Symbol;Acc:HGNC:12303]	15931	15318	12382	8578
ENSG00000038427	VCAN	14678	5	83471618	83582303	versican [Source:HGNC Symbol;Acc:HGNC:2464]	0	10	0	0
ENSG00000038532	CLEC16A	12548	16	10944539	11182186	C-type lectin domain containing 16A [Source:HGNC Symbol;Acc:HGNC:29013]	1434	1683	1219	1254
ENSG00000039068	CDH1	6076	16	68737292	68835537	cadherin 1 [Source:HGNC Symbol;Acc:HGNC:1748]	6450	6351	3810	4230
ENSG00000039123	MTREX	6347	5	55307989	55425579	Mtr4 exosome RNA helicase [Source:HGNC Symbol;Acc:HGNC:18734]	2323	2497	2526	2769
ENSG00000039139	DNAH5	24848	5	13690328	14011818	dynein axonemal heavy chain 5 [Source:HGNC Symbol;Acc:HGNC:2950]	936	878	867	763
ENSG00000039319	ZFYVE16	15490	5	80408013	80483379	zinc finger FYVE-type containing 16 [Source:HGNC Symbol;Acc:HGNC:20756]	2797	2652	1904	1339
ENSG00000039523	RIPOR1	6729	16	67518418	67546788	RHO family interacting cell polarization regulator 1 [Source:HGNC Symbol;Acc:HGNC:25836]	1612	1505	1377	1186
ENSG00000039537	C6	6900	5	41142116	41261438	complement C6 [Source:HGNC Symbol;Acc:HGNC:1339]	0	0	0	0
ENSG00000039560	RAI14	7581	5	34656328	34832612	retinoic acid induced 14 [Source:HGNC Symbol;Acc:HGNC:14873]	2081	2027	2398	2381
ENSG00000039600	SOX30	3489	5	157625679	157671480	SRY-box transcription factor 30 [Source:HGNC Symbol;Acc:HGNC:30635]	0	0	0	0
ENSG00000039650	PNKP	4545	19	49859882	49878351	polynucleotide kinase 3'-phosphatase [Source:HGNC Symbol;Acc:HGNC:9154]	446	467	1729	1678
ENSG00000039987	BEST2	2646	19	12751702	12758458	bestrophin 2 [Source:HGNC Symbol;Acc:HGNC:17107]	4	0	2	0
ENSG00000040199	PHLPP2	12493	16	71637835	71724701	PH domain and leucine rich repeat protein phosphatase 2 [Source:HGNC Symbol;Acc:HGNC:29149]	1598	1632	1096	996
ENSG00000040275	SPDL1	4775	5	169583636	169604778	spindle apparatus coiled-coil protein 1 [Source:HGNC Symbol;Acc:HGNC:26010]	2360	2534	2349	2141
ENSG00000040341	STAU2	8964	8	73420369	73747708	staufen double-stranded RNA binding protein 2 [Source:HGNC Symbol;Acc:HGNC:11371]	1494	1548	1269	1291
ENSG00000040487	SLC66A1	2686	1	19312326	19329300	solute carrier family 66 member 1 [Source:HGNC Symbol;Acc:HGNC:26001]	940	796	750	1020
ENSG00000040531	CTNS	4949	17	3636459	3663103	cystinosin, lysosomal cystine transporter [Source:HGNC Symbol;Acc:HGNC:2518]	563	635	655	692
ENSG00000040608	RTN4R	3126	22	20241415	20283246	reticulon 4 receptor [Source:HGNC Symbol;Acc:HGNC:18601]	916	972	865	1491
ENSG00000040633	PHF23	2733	17	7235029	7239722	PHD finger protein 23 [Source:HGNC Symbol;Acc:HGNC:28428]	834	997	1412	1484
ENSG00000040933	INPP4A	13556	2	98444854	98594392	inositol polyphosphate-4-phosphatase type I A [Source:HGNC Symbol;Acc:HGNC:6074]	2326	2149	1826	1475
ENSG00000041353	RAB27B	7154	18	54717860	54895516	RAB27B, member RAS oncogene family [Source:HGNC Symbol;Acc:HGNC:9767]	1868	1625	2136	1727
ENSG00000041357	PSMA4	6994	15	78540405	78552417	proteasome 20S subunit alpha 4 [Source:HGNC Symbol;Acc:HGNC:9533]	3818	3684	5226	5400
ENSG00000041515	MYO16	8816	13	108596152	109208005	myosin XVI [Source:HGNC Symbol;Acc:HGNC:29822]	21	6	7	4
ENSG00000041802	LSG1	4801	3	194640791	194672463	large 60S subunit nuclear export GTPase 1 [Source:HGNC Symbol;Acc:HGNC:25652]	1787	1774	1553	1797
ENSG00000041880	PARP3	3198	3	51942345	51948867	poly(ADP-ribose) polymerase family member 3 [Source:HGNC Symbol;Acc:HGNC:273]	562	590	816	926
ENSG00000041982	TNC	9589	9	115019575	115118207	tenascin C [Source:HGNC Symbol;Acc:HGNC:5318]	4869	4896	1858	1655
ENSG00000041988	THAP3	4067	1	6624868	6635586	THAP domain containing 3 [Source:HGNC Symbol;Acc:HGNC:20855]	185	205	266	284
ENSG00000042062	RIPOR3	6023	20	50586108	50691542	RIPOR family member 3 [Source:HGNC Symbol;Acc:HGNC:16168]	54	20	66	47
ENSG00000042088	TDP1	6223	14	89954939	90044764	tyrosyl-DNA phosphodiesterase 1 [Source:HGNC Symbol;Acc:HGNC:18884]	1164	1101	1003	1318
ENSG00000042286	AIFM2	5135	10	70098223	70132934	apoptosis inducing factor mitochondria associated 2 [Source:HGNC Symbol;Acc:HGNC:21411]	957	931	877	842
ENSG00000042317	SPATA7	6872	14	88384924	88470350	spermatogenesis associated 7 [Source:HGNC Symbol;Acc:HGNC:20423]	33	61	85	126
ENSG00000042429	MED17	16610	11	93784227	93814963	mediator complex subunit 17 [Source:HGNC Symbol;Acc:HGNC:2375]	69	109	124	79
ENSG00000042445	RETSAT	4049	2	85341955	85354531	retinol saturase [Source:HGNC Symbol;Acc:HGNC:25991]	4151	4001	2345	2107
ENSG00000042493	CAPG	2419	2	85394753	85418432	capping actin protein, gelsolin like [Source:HGNC Symbol;Acc:HGNC:1474]	2469	2549	2270	2831
ENSG00000042753	AP2S1	1558	19	46838136	46850846	adaptor related protein complex 2 subunit sigma 1 [Source:HGNC Symbol;Acc:HGNC:565]	3535	3453	5350	6162
ENSG00000042781	USH2A	20633	1	215622891	216423448	usherin [Source:HGNC Symbol;Acc:HGNC:12601]	0	1	1	0
ENSG00000042832	TG	11132	8	132866958	133134903	thyroglobulin [Source:HGNC Symbol;Acc:HGNC:11764]	0	0	0	0
ENSG00000042980	ADAM28	9381	8	24294069	24359014	ADAM metallopeptidase domain 28 [Source:HGNC Symbol;Acc:HGNC:206]	93	86	77	58
ENSG00000043039	BARX2	3752	11	129375848	129452279	BARX homeobox 2 [Source:HGNC Symbol;Acc:HGNC:956]	1381	1337	2314	2277
ENSG00000043093	DCUN1D1	8307	3	182938074	182985953	defective in cullin neddylation 1 domain containing 1 [Source:HGNC Symbol;Acc:HGNC:18184]	1930	1670	1552	1682
ENSG00000043143	JADE2	11091	5	134524312	134583230	jade family PHD finger 2 [Source:HGNC Symbol;Acc:HGNC:22984]	3246	3269	2620	3083
ENSG00000043355	ZIC2	3290	13	99981784	99986765	Zic family member 2 [Source:HGNC Symbol;Acc:HGNC:12873]	748	742	888	955
ENSG00000043462	LCP2	6823	5	170246233	170297815	lymphocyte cytosolic protein 2 [Source:HGNC Symbol;Acc:HGNC:6529]	2	2	0	4
ENSG00000043514	TRIT1	6533	1	39838110	39883511	tRNA isopentenyltransferase 1 [Source:HGNC Symbol;Acc:HGNC:20286]	1208	933	1401	1312
ENSG00000043591	ADRB1	3039	10	114043866	114046904	adrenoceptor beta 1 [Source:HGNC Symbol;Acc:HGNC:285]	267	318	183	314
ENSG00000044012	GUCA2B	604	1	42153410	42155820	guanylate cyclase activator 2B [Source:HGNC Symbol;Acc:HGNC:4683]	8	2	0	0
ENSG00000044090	CUL7	7873	6	43037617	43053943	cullin 7 [Source:HGNC Symbol;Acc:HGNC:21024]	1134	954	991	1039
ENSG00000044115	CTNNA1	8830	5	138610967	138935034	catenin alpha 1 [Source:HGNC Symbol;Acc:HGNC:2509]	3500	3387	4283	3748
ENSG00000044446	PHKA2	8547	X	18892298	18984114	phosphorylase kinase regulatory subunit alpha 2 [Source:HGNC Symbol;Acc:HGNC:8926]	1058	1232	1404	1127
ENSG00000044459	CNTLN	11064	9	17134982	17503923	centlein [Source:HGNC Symbol;Acc:HGNC:23432]	716	687	441	402
ENSG00000044574	HSPA5	6530	9	125234853	125241382	heat shock protein family A (Hsp70) member 5 [Source:HGNC Symbol;Acc:HGNC:5238]	11851	11990	18940	20632
ENSG00000046604	DSG2	9492	18	31498177	31549008	desmoglein 2 [Source:HGNC Symbol;Acc:HGNC:3049]	7329	7311	4918	3482
ENSG00000046647	GEMIN8	4001	X	14006726	14029893	gem nuclear organelle associated protein 8 [Source:HGNC Symbol;Acc:HGNC:26044]	392	359	458	437
ENSG00000046651	OFD1	15550	X	13734743	13777955	OFD1 centriole and centriolar satellite protein [Source:HGNC Symbol;Acc:HGNC:2567]	963	934	1297	980
ENSG00000046653	GPM6B	5767	X	13770939	13938638	glycoprotein M6B [Source:HGNC Symbol;Acc:HGNC:4461]	28	6	16	8
ENSG00000046774	MAGEC2	1994	X	142202342	142205290	MAGE family member C2 [Source:HGNC Symbol;Acc:HGNC:13574]	77	72	52	36
ENSG00000046889	PREX2	12132	8	67952046	68237032	phosphatidylinositol-3,4,5-trisphosphate dependent Rac exchange factor 2 [Source:HGNC Symbol;Acc:HGNC:22950]	0	2	0	0
ENSG00000047056	WDR37	8029	10	1049538	1160991	WD repeat domain 37 [Source:HGNC Symbol;Acc:HGNC:31406]	1698	1639	1341	1317
ENSG00000047188	YTHDC2	10805	5	113513694	113595285	YTH domain containing 2 [Source:HGNC Symbol;Acc:HGNC:24721]	2495	2454	1857	1563
ENSG00000047230	CTPS2	5531	X	16587999	16712936	CTP synthase 2 [Source:HGNC Symbol;Acc:HGNC:2520]	1297	1400	930	936
ENSG00000047249	ATP6V1H	5104	8	53715543	53843558	ATPase H+ transporting V1 subunit H [Source:HGNC Symbol;Acc:HGNC:18303]	1666	1554	1280	1609
ENSG00000047315	POLR2B	5891	4	56977722	57031158	RNA polymerase II subunit B [Source:HGNC Symbol;Acc:HGNC:9188]	5410	5477	4668	4313
ENSG00000047346	ATOSA	9848	15	52581317	52709817	atos homolog A [Source:HGNC Symbol;Acc:HGNC:25609]	459	480	434	323
ENSG00000047365	ARAP2	12427	4	35948221	36244514	ArfGAP with RhoGAP domain, ankyrin repeat and PH domain 2 [Source:HGNC Symbol;Acc:HGNC:16924]	957	884	1062	859
ENSG00000047410	TPR	12350	1	186311652	186375693	translocated promoter region, nuclear basket protein [Source:HGNC Symbol;Acc:HGNC:12017]	11408	11108	8042	6949
ENSG00000047457	CP	7072	3	149162410	149221829	ceruloplasmin [Source:HGNC Symbol;Acc:HGNC:2295]	1955	1721	1761	1380
ENSG00000047578	KATNIP	9759	16	27550133	27780344	katanin interacting protein [Source:HGNC Symbol;Acc:HGNC:29068]	1166	1073	942	712
ENSG00000047579	DTNBP1	3046	6	15522807	15663058	dystrobrevin binding protein 1 [Source:HGNC Symbol;Acc:HGNC:17328]	1088	1111	1634	2023
ENSG00000047597	XK	5174	X	37685791	37732130	X-linked Kx blood group antigen, Kell and VPS13A binding protein [Source:HGNC Symbol;Acc:HGNC:12811]	98	56	50	25
ENSG00000047621	C12orf4	4932	12	4487735	4538508	chromosome 12 open reading frame 4 [Source:HGNC Symbol;Acc:HGNC:1184]	817	840	559	684
ENSG00000047634	SCML1	5497	X	17737449	17754988	Scm polycomb group protein like 1 [Source:HGNC Symbol;Acc:HGNC:10580]	962	831	875	509
ENSG00000047644	WWC3	7416	X	10015254	10144474	WWC family member 3 [Source:HGNC Symbol;Acc:HGNC:29237]	4713	5061	4360	4101
ENSG00000047648	ARHGAP6	8893	X	11117651	11665920	Rho GTPase activating protein 6 [Source:HGNC Symbol;Acc:HGNC:676]	24	15	4	6
ENSG00000047662	FAM184B	6731	4	17629306	17781621	family with sequence similarity 184 member B [Source:HGNC Symbol;Acc:HGNC:29235]	9	2	7	2
ENSG00000047849	MAP4	14994	3	47850690	48089272	microtubule associated protein 4 [Source:HGNC Symbol;Acc:HGNC:6862]	11673	11411	6833	8495
ENSG00000047932	GOPC	4628	6	117560269	117602542	golgi associated PDZ and coiled-coil motif containing [Source:HGNC Symbol;Acc:HGNC:17643]	3531	3514	3790	3055
ENSG00000047936	ROS1	8890	6	117287353	117425942	ROS proto-oncogene 1, receptor tyrosine kinase [Source:HGNC Symbol;Acc:HGNC:10261]	1352	1003	283	131
ENSG00000048028	USP28	5793	11	113797874	113875572	ubiquitin specific peptidase 28 [Source:HGNC Symbol;Acc:HGNC:12625]	2830	2783	2408	2214
ENSG00000048052	HDAC9	17284	7	18086949	19002416	histone deacetylase 9 [Source:HGNC Symbol;Acc:HGNC:14065]	2454	2408	1083	1024
ENSG00000048140	TSPAN17	5215	5	176647387	176659054	tetraspanin 17 [Source:HGNC Symbol;Acc:HGNC:13594]	5674	5812	5059	6563
ENSG00000048162	NOP16	2806	5	176383946	176388927	NOP16 nucleolar protein [Source:HGNC Symbol;Acc:HGNC:26934]	1240	1160	1951	1665
ENSG00000048342	CC2D2A	14588	4	15469865	15601552	coiled-coil and C2 domain containing 2A [Source:HGNC Symbol;Acc:HGNC:29253]	81	55	19	13
ENSG00000048392	RRM2B	5391	8	102204502	102238961	ribonucleotide reductase regulatory TP53 inducible subunit M2B [Source:HGNC Symbol;Acc:HGNC:17296]	486	606	786	913
ENSG00000048405	ZNF800	5793	7	127346790	127431924	zinc finger protein 800 [Source:HGNC Symbol;Acc:HGNC:27267]	1384	1213	1266	1087
ENSG00000048462	TNFRSF17	1015	16	11965210	11968068	TNF receptor superfamily member 17 [Source:HGNC Symbol;Acc:HGNC:11913]	3	0	0	0
ENSG00000048471	SNX29	11299	16	11976734	12574287	sorting nexin 29 [Source:HGNC Symbol;Acc:HGNC:30542]	406	369	207	225
ENSG00000048540	LMO3	10002	12	16548372	16610594	LIM domain only 3 [Source:HGNC Symbol;Acc:HGNC:6643]	0	5	2	8
ENSG00000048544	MRPS10	2100	6	42206807	42217861	mitochondrial ribosomal protein S10 [Source:HGNC Symbol;Acc:HGNC:14502]	2251	2438	2386	2872
ENSG00000048649	RSF1	15579	11	77660009	77820869	remodeling and spacing factor 1 [Source:HGNC Symbol;Acc:HGNC:18118]	4354	4401	2977	2363
ENSG00000048707	VPS13D	20768	1	12230030	12512047	vacuolar protein sorting 13 homolog D [Source:HGNC Symbol;Acc:HGNC:23595]	3795	3946	2139	1607
ENSG00000048740	CELF2	11029	10	10798397	11336675	CUGBP Elav-like family member 2 [Source:HGNC Symbol;Acc:HGNC:2550]	78	79	81	62
ENSG00000048828	FAM120A	7246	9	93451685	93566112	family with sequence similarity 120A [Source:HGNC Symbol;Acc:HGNC:13247]	7683	7493	7188	6506
ENSG00000048991	R3HDM1	7892	2	135531455	135725270	R3H domain containing 1 [Source:HGNC Symbol;Acc:HGNC:9757]	4080	3955	3750	3493
ENSG00000049089	COL9A2	4215	1	40300489	40317813	collagen type IX alpha 2 chain [Source:HGNC Symbol;Acc:HGNC:2218]	302	256	185	152
ENSG00000049130	KITLG	6205	12	88492793	88580851	KIT ligand [Source:HGNC Symbol;Acc:HGNC:6343]	7178	7257	3266	2554
ENSG00000049167	ERCC8	26458	5	60866454	60945073	ERCC excision repair 8, CSA ubiquitin ligase complex subunit [Source:HGNC Symbol;Acc:HGNC:3439]	375	293	350	269
ENSG00000049192	ADAMTS6	8565	5	65148738	65481920	ADAM metallopeptidase with thrombospondin type 1 motif 6 [Source:HGNC Symbol;Acc:HGNC:222]	0	0	0	0
ENSG00000049239	H6PD	9322	1	9234774	9271337	hexose-6-phosphate dehydrogenase/glucose 1-dehydrogenase [Source:HGNC Symbol;Acc:HGNC:4795]	2250	2342	1425	1586
ENSG00000049245	VAMP3	2733	1	7771296	7781432	vesicle associated membrane protein 3 [Source:HGNC Symbol;Acc:HGNC:12644]	3602	3543	2979	3167
ENSG00000049246	PER3	8128	1	7784291	7845177	period circadian regulator 3 [Source:HGNC Symbol;Acc:HGNC:8847]	1260	1138	1232	979
ENSG00000049249	TNFRSF9	6354	1	7915871	7943165	TNF receptor superfamily member 9 [Source:HGNC Symbol;Acc:HGNC:11924]	4	6	0	0
ENSG00000049283	EPN3	4503	17	50532682	50543750	epsin 3 [Source:HGNC Symbol;Acc:HGNC:18235]	643	591	689	966
ENSG00000049323	LTBP1	7348	2	32946953	33399509	latent transforming growth factor beta binding protein 1 [Source:HGNC Symbol;Acc:HGNC:6714]	2036	2228	1159	1082
ENSG00000049449	RCN1	4472	11	32091074	32105722	reticulocalbin 1 [Source:HGNC Symbol;Acc:HGNC:9934]	5024	4735	5559	6211
ENSG00000049540	ELN	6572	7	74027789	74069907	elastin [Source:HGNC Symbol;Acc:HGNC:3327]	4	0	0	0
ENSG00000049541	RFC2	2211	7	74231499	74254458	replication factor C subunit 2 [Source:HGNC Symbol;Acc:HGNC:9970]	1788	1926	1522	2023
ENSG00000049618	ARID1B	45931	6	156776020	157210779	AT-rich interaction domain 1B [Source:HGNC Symbol;Acc:HGNC:18040]	5920	5973	4126	3766
ENSG00000049656	CLPTM1L	6549	5	1317752	1345099	CLPTM1 like [Source:HGNC Symbol;Acc:HGNC:24308]	13174	13750	13979	16896
ENSG00000049759	NEDD4L	34097	18	58044226	58401540	NEDD4 like E3 ubiquitin protein ligase [Source:HGNC Symbol;Acc:HGNC:7728]	2628	2344	2207	2195
ENSG00000049768	FOXP3	2619	X	49250438	49264800	forkhead box P3 [Source:HGNC Symbol;Acc:HGNC:6106]	6	6	11	14
ENSG00000049769	PPP1R3F	4378	X	49269793	49301461	protein phosphatase 1 regulatory subunit 3F [Source:HGNC Symbol;Acc:HGNC:14944]	106	71	113	147
ENSG00000049860	HEXB	5015	5	74640023	74722647	hexosaminidase subunit beta [Source:HGNC Symbol;Acc:HGNC:4879]	3421	3548	3092	3446
ENSG00000049883	PTCD2	12115	5	72320367	72368395	pentatricopeptide repeat domain 2 [Source:HGNC Symbol;Acc:HGNC:25734]	405	349	255	253
ENSG00000050030	NEXMIF	12338	X	74732856	74925472	neurite extension and migration factor [Source:HGNC Symbol;Acc:HGNC:29433]	0	0	0	2
ENSG00000050130	JKAMP	4350	14	59484443	59505410	JNK1/MAPK8 associated membrane protein [Source:HGNC Symbol;Acc:HGNC:20184]	1462	1470	2434	2420
ENSG00000050165	DKK3	11958	11	11956207	12009769	dickkopf WNT signaling pathway inhibitor 3 [Source:HGNC Symbol;Acc:HGNC:2893]	4	0	0	0
ENSG00000050327	ARHGEF5	5818	7	144355288	144380632	Rho guanine nucleotide exchange factor 5 [Source:HGNC Symbol;Acc:HGNC:13209]	2701	2672	1729	2190
ENSG00000050344	NFE2L3	4303	7	26152198	26187137	NFE2 like bZIP transcription factor 3 [Source:HGNC Symbol;Acc:HGNC:7783]	1207	1307	1685	1862
ENSG00000050393	MCUR1	6057	6	13786557	13814568	mitochondrial calcium uniporter regulator 1 [Source:HGNC Symbol;Acc:HGNC:21097]	8106	7937	6807	6666
ENSG00000050405	LIMA1	6291	12	50175788	50283520	LIM domain and actin binding 1 [Source:HGNC Symbol;Acc:HGNC:24636]	4770	4395	2135	2045
ENSG00000050426	LETMD1	6032	12	51047962	51060424	LETM1 domain containing 1 [Source:HGNC Symbol;Acc:HGNC:24241]	855	891	920	974
ENSG00000050438	SLC4A8	17920	12	51391317	51515763	solute carrier family 4 member 8 [Source:HGNC Symbol;Acc:HGNC:11034]	222	189	117	158
ENSG00000050555	LAMC3	8939	9	131009174	131094473	laminin subunit gamma 3 [Source:HGNC Symbol;Acc:HGNC:6494]	8	3	9	1
ENSG00000050628	PTGER3	10287	1	70852353	71047816	prostaglandin E receptor 3 [Source:HGNC Symbol;Acc:HGNC:9595]	372	362	97	98
ENSG00000050730	TNIP3	3749	4	121131408	121227466	TNFAIP3 interacting protein 3 [Source:HGNC Symbol;Acc:HGNC:19315]	23	10	8	27
ENSG00000050748	MAPK9	8955	5	180233143	180292099	mitogen-activated protein kinase 9 [Source:HGNC Symbol;Acc:HGNC:6886]	5380	5351	5437	5627
ENSG00000050767	COL23A1	4359	5	178237476	178590393	collagen type XXIII alpha 1 chain [Source:HGNC Symbol;Acc:HGNC:22990]	86	48	52	68
ENSG00000050820	BCAR1	9199	16	75228181	75268053	BCAR1 scaffold protein, Cas family member [Source:HGNC Symbol;Acc:HGNC:971]	6848	6777	5534	6239
ENSG00000051009	FHIP1B	4726	11	6211345	6234711	FHF complex subunit HOOK interacting protein 1B [Source:HGNC Symbol;Acc:HGNC:25378]	1012	792	895	1027
ENSG00000051108	HERPUD1	5062	16	56932142	56944864	homocysteine inducible ER protein with ubiquitin like domain 1 [Source:HGNC Symbol;Acc:HGNC:13744]	1830	1770	2571	2399
ENSG00000051128	HOMER3	3422	19	18929201	18941261	homer scaffold protein 3 [Source:HGNC Symbol;Acc:HGNC:17514]	2927	2512	4133	4929
ENSG00000051180	RAD51	3084	15	40694774	40732340	RAD51 recombinase [Source:HGNC Symbol;Acc:HGNC:9817]	649	705	907	1107
ENSG00000051341	POLQ	9185	3	121431431	121545988	DNA polymerase theta [Source:HGNC Symbol;Acc:HGNC:9186]	1106	1097	983	694
ENSG00000051382	PIK3CB	7841	3	138652698	138834928	phosphatidylinositol-4,5-bisphosphate 3-kinase catalytic subunit beta [Source:HGNC Symbol;Acc:HGNC:8976]	4080	3984	2464	2646
ENSG00000051523	CYBA	4161	16	88643275	88651083	cytochrome b-245 alpha chain [Source:HGNC Symbol;Acc:HGNC:2577]	1979	2010	3696	4226
ENSG00000051596	THOC3	3449	5	175917873	176034680	THO complex subunit 3 [Source:HGNC Symbol;Acc:HGNC:19072]	1169	1239	1554	1616
ENSG00000051620	HEBP2	10352	6	138403531	138422197	heme binding protein 2 [Source:HGNC Symbol;Acc:HGNC:15716]	5138	4427	4351	4811
ENSG00000051825	MPHOSPH9	10304	12	123152320	123244014	M-phase phosphoprotein 9 [Source:HGNC Symbol;Acc:HGNC:7215]	692	651	694	537
ENSG00000052126	PLEKHA5	36233	12	19129669	19376400	pleckstrin homology domain containing A5 [Source:HGNC Symbol;Acc:HGNC:30036]	0	2	2	0
ENSG00000052344	PRSS8	2975	16	31131433	31135727	serine protease 8 [Source:HGNC Symbol;Acc:HGNC:9491]	2815	2698	2946	3542
ENSG00000052723	SIKE1	5894	1	114769479	114780685	suppressor of IKBKE 1 [Source:HGNC Symbol;Acc:HGNC:26119]	3677	3535	3666	2631
ENSG00000052749	RRP12	8529	10	97356358	97426076	ribosomal RNA processing 12 homolog [Source:HGNC Symbol;Acc:HGNC:29100]	901	944	2562	4029
ENSG00000052795	FNIP2	10981	4	158769026	158908050	folliculin interacting protein 2 [Source:HGNC Symbol;Acc:HGNC:29280]	2430	2133	867	748
ENSG00000052802	MSMO1	2852	4	165327667	165343164	methylsterol monooxygenase 1 [Source:HGNC Symbol;Acc:HGNC:10545]	2736	2915	6726	7532
ENSG00000052841	TTC17	11296	11	43358920	43494933	tetratricopeptide repeat domain 17 [Source:HGNC Symbol;Acc:HGNC:25596]	7015	6726	7261	7217
ENSG00000052850	ALX4	5727	11	44260440	44310139	ALX homeobox 4 [Source:HGNC Symbol;Acc:HGNC:450]	42	59	16	15
ENSG00000053108	FSTL4	6710	5	133196455	133612541	follistatin like 4 [Source:HGNC Symbol;Acc:HGNC:21389]	2	2	6	6
ENSG00000053254	FOXN3	11154	14	89124871	89619149	forkhead box N3 [Source:HGNC Symbol;Acc:HGNC:1928]	865	972	743	626
ENSG00000053328	METTL24	3839	6	110243940	110358349	methyltransferase like 24 [Source:HGNC Symbol;Acc:HGNC:21566]	0	1	0	6
ENSG00000053371	AKR7A2	1779	1	19303965	19312144	aldo-keto reductase family 7 member A2 [Source:HGNC Symbol;Acc:HGNC:389]	1186	978	983	1264
ENSG00000053372	MRTO4	2556	1	19251805	19260128	MRT4 homolog, ribosome maturation factor [Source:HGNC Symbol;Acc:HGNC:18477]	1921	1898	2463	3134
ENSG00000053438	NNAT	1329	20	37521206	37523690	neuronatin [Source:HGNC Symbol;Acc:HGNC:7860]	34	26	64	18
ENSG00000053501	USE1	2431	19	17215346	17219829	unconventional SNARE in the ER 1 [Source:HGNC Symbol;Acc:HGNC:30882]	187	170	319	312
ENSG00000053524	MCF2L2	20884	3	183178041	183428778	MCF.2 cell line derived transforming sequence-like 2 [Source:HGNC Symbol;Acc:HGNC:30319]	30	15	19	22
ENSG00000053702	NRIP2	2814	12	2825348	2835544	nuclear receptor interacting protein 2 [Source:HGNC Symbol;Acc:HGNC:23078]	13	18	40	28
ENSG00000053747	LAMA3	14488	18	23689453	23956222	laminin subunit alpha 3 [Source:HGNC Symbol;Acc:HGNC:6483]	737	807	407	211
ENSG00000053770	AP5M1	13019	14	57268924	57298742	adaptor related protein complex 5 subunit mu 1 [Source:HGNC Symbol;Acc:HGNC:20192]	3188	3055	2450	2519
ENSG00000053900	ANAPC4	7444	4	25377263	25418498	anaphase promoting complex subunit 4 [Source:HGNC Symbol;Acc:HGNC:19990]	1008	887	995	996
ENSG00000053918	KCNQ1	4450	11	2444654	2849105	potassium voltage-gated channel subfamily Q member 1 [Source:HGNC Symbol;Acc:HGNC:6294]	56	44	116	135
ENSG00000054116	TRAPPC3	3527	1	36136570	36156053	trafficking protein particle complex subunit 3 [Source:HGNC Symbol;Acc:HGNC:19942]	2788	2534	3102	3370
ENSG00000054118	THRAP3	4720	1	36224432	36305357	thyroid hormone receptor associated protein 3 [Source:HGNC Symbol;Acc:HGNC:22964]	5542	5879	6842	6258
ENSG00000054148	PHPT1	1612	9	136848724	136851027	phosphohistidine phosphatase 1 [Source:HGNC Symbol;Acc:HGNC:30033]	152	174	586	394
ENSG00000054179	ENTPD2	2640	9	137048107	137054061	ectonucleoside triphosphate diphosphohydrolase 2 [Source:HGNC Symbol;Acc:HGNC:3364]	96	61	216	145
ENSG00000054219	LY75	8805	2	159803355	159904756	lymphocyte antigen 75 [Source:HGNC Symbol;Acc:HGNC:6729]	446	488	416	530
ENSG00000054267	ARID4B	11073	1	235131634	235328219	AT-rich interaction domain 4B [Source:HGNC Symbol;Acc:HGNC:15550]	2414	2515	2130	1804
ENSG00000054277	OPN3	3724	1	241590102	241677376	opsin 3 [Source:HGNC Symbol;Acc:HGNC:14007]	512	536	185	199
ENSG00000054282	SDCCAG8	5321	1	243256034	243500091	SHH signaling and ciliogenesis regulator SDCCAG8 [Source:HGNC Symbol;Acc:HGNC:10671]	613	572	434	465
ENSG00000054356	PTPRN	8228	2	219289623	219309648	protein tyrosine phosphatase receptor type N [Source:HGNC Symbol;Acc:HGNC:9676]	0	2	0	2
ENSG00000054392	HHAT	6645	1	210328252	210676296	hedgehog acyltransferase [Source:HGNC Symbol;Acc:HGNC:18270]	178	187	125	121
ENSG00000054523	KIF1B	18915	1	10210570	10381603	kinesin family member 1B [Source:HGNC Symbol;Acc:HGNC:16636]	3604	3672	2656	2296
ENSG00000054598	FOXC1	3983	6	1609915	1613897	forkhead box C1 [Source:HGNC Symbol;Acc:HGNC:3800]	2289	2130	2592	2668
ENSG00000054611	TBC1D22A	5315	22	46762617	47175699	TBC1 domain family member 22A [Source:HGNC Symbol;Acc:HGNC:1309]	2026	1859	1990	2612
ENSG00000054654	SYNE2	32359	14	63761899	64226433	spectrin repeat containing nuclear envelope protein 2 [Source:HGNC Symbol;Acc:HGNC:17084]	10292	10873	4433	3281
ENSG00000054690	PLEKHH1	10828	14	67533290	67589612	pleckstrin homology, MyTH4 and FERM domain containing H1 [Source:HGNC Symbol;Acc:HGNC:17733]	433	496	731	354
ENSG00000054793	ATP9A	8073	20	51596514	51768390	ATPase phospholipid transporting 9A (putative) [Source:HGNC Symbol;Acc:HGNC:13540]	5914	5719	3907	3558
ENSG00000054938	CHRDL2	3114	11	74696429	74731426	chordin like 2 [Source:HGNC Symbol;Acc:HGNC:24168]	0	0	2	3
ENSG00000054965	FAM168A	7887	11	73400487	73598189	family with sequence similarity 168 member A [Source:HGNC Symbol;Acc:HGNC:28999]	6040	5632	4053	3182
ENSG00000054967	RELT	6187	11	73376399	73397474	RELT TNF receptor [Source:HGNC Symbol;Acc:HGNC:13764]	817	777	1099	952
ENSG00000055044	NOP58	3274	2	202265736	202303661	NOP58 ribonucleoprotein [Source:HGNC Symbol;Acc:HGNC:29926]	2363	2212	2902	2937
ENSG00000055070	SZRD1	4742	1	16352575	16398145	SUZ RNA binding domain containing 1 [Source:HGNC Symbol;Acc:HGNC:30232]	3042	2925	2845	3457
ENSG00000055118	KCNH2	7207	7	150944961	150978321	potassium voltage-gated channel subfamily H member 2 [Source:HGNC Symbol;Acc:HGNC:6251]	0	0	0	0
ENSG00000055130	CUL1	4152	7	148697914	148801110	cullin 1 [Source:HGNC Symbol;Acc:HGNC:2551]	4134	4127	3282	3617
ENSG00000055147	FAM114A2	6523	5	153990148	154038936	family with sequence similarity 114 member A2 [Source:HGNC Symbol;Acc:HGNC:1333]	590	543	513	517
ENSG00000055208	TAB2	6109	6	149218641	149411613	TGF-beta activated kinase 1 (MAP3K7) binding protein 2 [Source:HGNC Symbol;Acc:HGNC:17075]	5582	5331	4859	5182
ENSG00000055211	GINM1	2250	6	149566294	149591748	glycosylated integral membrane protein 1 [Source:HGNC Symbol;Acc:HGNC:21074]	1910	1898	1648	2053
ENSG00000055332	EIF2AK2	11036	2	37099210	37157522	eukaryotic translation initiation factor 2 alpha kinase 2 [Source:HGNC Symbol;Acc:HGNC:9437]	10371	10646	5840	5032
ENSG00000055483	USP36	9269	17	78787381	78841441	ubiquitin specific peptidase 36 [Source:HGNC Symbol;Acc:HGNC:20062]	3864	3616	4336	3841
ENSG00000055609	KMT2C	53322	7	152134922	152436644	lysine methyltransferase 2C [Source:HGNC Symbol;Acc:HGNC:13726]	3680	3608	2226	1401
ENSG00000055732	MCOLN3	6624	1	85018082	85048500	mucolipin TRP cation channel 3 [Source:HGNC Symbol;Acc:HGNC:13358]	369	451	589	494
ENSG00000055917	PUM2	6979	2	20248691	20352234	pumilio RNA binding family member 2 [Source:HGNC Symbol;Acc:HGNC:14958]	10557	10217	8191	7301
ENSG00000055950	MRPL43	3578	10	100969458	100987515	mitochondrial ribosomal protein L43 [Source:HGNC Symbol;Acc:HGNC:14517]	660	684	1017	836
ENSG00000055955	ITIH4	4659	3	52812962	52830688	inter-alpha-trypsin inhibitor heavy chain 4 [Source:HGNC Symbol;Acc:HGNC:6169]	2	2	1	1
ENSG00000055957	ITIH1	4541	3	52777595	52792068	inter-alpha-trypsin inhibitor heavy chain 1 [Source:HGNC Symbol;Acc:HGNC:6166]	0	0	0	0
ENSG00000056050	HPF1	1422	4	169729470	169757944	histone PARylation factor 1 [Source:HGNC Symbol;Acc:HGNC:26051]	968	817	1015	1113
ENSG00000056097	ZFR	6771	5	32354350	32444740	zinc finger RNA binding protein [Source:HGNC Symbol;Acc:HGNC:17277]	5796	5745	5398	5300
ENSG00000056277	ZNF280C	4638	X	130202707	130268899	zinc finger protein 280C [Source:HGNC Symbol;Acc:HGNC:25955]	309	259	244	172
ENSG00000056487	PHF21B	6007	22	44881162	45010005	PHD finger protein 21B [Source:HGNC Symbol;Acc:HGNC:25161]	0	0	2	0
ENSG00000056558	TRAF1	4476	9	120902393	120929173	TNF receptor associated factor 1 [Source:HGNC Symbol;Acc:HGNC:12031]	126	103	51	18
ENSG00000056586	RC3H2	11563	9	122844556	122905359	ring finger and CCCH-type domains 2 [Source:HGNC Symbol;Acc:HGNC:21461]	4341	4648	3741	3235
ENSG00000056736	IL17RB	3044	3	53846568	53865794	interleukin 17 receptor B [Source:HGNC Symbol;Acc:HGNC:18015]	263	211	384	289
ENSG00000056972	TRAF3IP2	12634	6	111555381	111606906	TRAF3 interacting protein 2 [Source:HGNC Symbol;Acc:HGNC:1343]	1573	1611	1623	1661
ENSG00000056998	GYG2	3612	X	2828822	2882818	glycogenin 2 [Source:HGNC Symbol;Acc:HGNC:4700]	386	488	531	534
ENSG00000057019	DCBLD2	11280	3	98795941	98901695	discoidin, CUB and LCCL domain containing 2 [Source:HGNC Symbol;Acc:HGNC:24627]	3120	2896	1369	1097
ENSG00000057149	SERPINB3	1707	18	63655197	63661893	serpin family B member 3 [Source:HGNC Symbol;Acc:HGNC:10569]	32	22	235	155
ENSG00000057252	SOAT1	7005	1	179293714	179358680	sterol O-acyltransferase 1 [Source:HGNC Symbol;Acc:HGNC:11177]	2303	2135	2073	2065
ENSG00000057294	PKP2	10288	12	32790745	32896798	plakophilin 2 [Source:HGNC Symbol;Acc:HGNC:9024]	5165	4877	2282	2252
ENSG00000057468	MSH4	3270	1	75796882	75913242	mutS homolog 4 [Source:HGNC Symbol;Acc:HGNC:7327]	0	0	0	3
ENSG00000057593	F7	3799	13	113105788	113120685	coagulation factor VII [Source:HGNC Symbol;Acc:HGNC:3544]	4	2	0	2
ENSG00000057608	GDI2	3918	10	5765223	5842132	GDP dissociation inhibitor 2 [Source:HGNC Symbol;Acc:HGNC:4227]	20513	20000	14577	20331
ENSG00000057657	PRDM1	6750	6	105993463	106109939	PR/SET domain 1 [Source:HGNC Symbol;Acc:HGNC:9346]	1430	1339	624	650
ENSG00000057663	ATG5	5655	6	106045423	106325791	autophagy related 5 [Source:HGNC Symbol;Acc:HGNC:589]	3935	3407	3212	3323
ENSG00000057704	TMCC3	6512	12	94567122	94650557	transmembrane and coiled-coil domain family 3 [Source:HGNC Symbol;Acc:HGNC:29199]	0	4	4	0
ENSG00000057757	PITHD1	2173	1	23778418	23788232	PITH domain containing 1 [Source:HGNC Symbol;Acc:HGNC:25022]	3749	3716	2718	3381
ENSG00000057935	MTA3	10580	2	42494569	42756947	metastasis associated 1 family member 3 [Source:HGNC Symbol;Acc:HGNC:23784]	2540	2466	2288	2572
ENSG00000058056	USP13	15296	3	179653032	179804366	ubiquitin specific peptidase 13 [Source:HGNC Symbol;Acc:HGNC:12611]	248	258	205	260
ENSG00000058063	ATP11B	9187	3	182793503	182921629	ATPase phospholipid transporting 11B (putative) [Source:HGNC Symbol;Acc:HGNC:13553]	3628	3266	2153	1842
ENSG00000058085	LAMC2	6770	1	183186238	183245127	laminin subunit gamma 2 [Source:HGNC Symbol;Acc:HGNC:6493]	5626	5318	2479	2473
ENSG00000058091	CDK14	7017	7	90466424	91210590	cyclin dependent kinase 14 [Source:HGNC Symbol;Acc:HGNC:8883]	652	617	118	126
ENSG00000058262	SEC61A1	11707	3	128051641	128071705	SEC61 translocon subunit alpha 1 [Source:HGNC Symbol;Acc:HGNC:18276]	18672	18392	15222	20410
ENSG00000058272	PPP1R12A	11864	12	79773563	79935460	protein phosphatase 1 regulatory subunit 12A [Source:HGNC Symbol;Acc:HGNC:7618]	2941	2823	1655	1561
ENSG00000058335	RASGRF1	9977	15	78959906	79090780	Ras protein specific guanine nucleotide releasing factor 1 [Source:HGNC Symbol;Acc:HGNC:9875]	325	292	381	554
ENSG00000058404	CAMK2B	11598	7	44210019	44334577	calcium/calmodulin dependent protein kinase II beta [Source:HGNC Symbol;Acc:HGNC:1461]	52	38	29	39
ENSG00000058453	CROCC	8875	1	16740273	16972964	ciliary rootlet coiled-coil, rootletin [Source:HGNC Symbol;Acc:HGNC:21299]	401	463	579	452
ENSG00000058600	POLR3E	9486	16	22297375	22335101	RNA polymerase III subunit E [Source:HGNC Symbol;Acc:HGNC:30347]	1363	1466	1872	1608
ENSG00000058668	ATP2B4	9502	1	203626832	203744081	ATPase plasma membrane Ca2+ transporting 4 [Source:HGNC Symbol;Acc:HGNC:817]	8221	8076	3634	2772
ENSG00000058673	ZC3H11A	12829	1	203795623	203854999	zinc finger CCCH-type containing 11A [Source:HGNC Symbol;Acc:HGNC:29093]	14	6	14	8
ENSG00000058729	RIOK2	5489	5	97160867	97183247	RIO kinase 2 [Source:HGNC Symbol;Acc:HGNC:18999]	964	1045	862	1028
ENSG00000058799	YIPF1	2036	1	53851719	53889798	Yip1 domain family member 1 [Source:HGNC Symbol;Acc:HGNC:25231]	1830	1799	1712	2139
ENSG00000058804	NDC1	4720	1	53765478	53838463	NDC1 transmembrane nucleoporin [Source:HGNC Symbol;Acc:HGNC:25525]	3803	4022	5013	5604
ENSG00000058866	DGKG	10975	3	186105668	186362234	diacylglycerol kinase gamma [Source:HGNC Symbol;Acc:HGNC:2853]	0	0	0	3
ENSG00000059122	FLYWCH1	8425	16	2911931	2951208	FLYWCH-type zinc finger 1 [Source:HGNC Symbol;Acc:HGNC:25404]	1419	1508	1707	1535
ENSG00000059145	UNKL	7494	16	1363205	1414751	unk like zinc finger [Source:HGNC Symbol;Acc:HGNC:14184]	368	361	714	578
ENSG00000059377	TBXAS1	6177	7	139777051	140020325	thromboxane A synthase 1 [Source:HGNC Symbol;Acc:HGNC:11609]	27	26	70	46
ENSG00000059378	PARP12	5510	7	140023749	140062951	poly(ADP-ribose) polymerase family member 12 [Source:HGNC Symbol;Acc:HGNC:21919]	1237	1337	1571	1544
ENSG00000059573	ALDH18A1	3759	10	95605941	95656711	aldehyde dehydrogenase 18 family member A1 [Source:HGNC Symbol;Acc:HGNC:9722]	3911	4091	3475	3964
ENSG00000059588	TARBP1	7819	1	234391313	234479179	TAR (HIV-1) RNA binding protein 1 [Source:HGNC Symbol;Acc:HGNC:11568]	1844	2019	3044	1782
ENSG00000059691	GATB	11741	4	151670504	151761007	glutamyl-tRNA amidotransferase subunit B [Source:HGNC Symbol;Acc:HGNC:8849]	1127	1012	850	969
ENSG00000059728	MXD1	6351	2	69897688	69942945	MAX dimerization protein 1 [Source:HGNC Symbol;Acc:HGNC:6761]	2552	2403	3480	2840
ENSG00000059758	CDK17	6467	12	96278261	96400480	cyclin dependent kinase 17 [Source:HGNC Symbol;Acc:HGNC:8750]	704	854	878	743
ENSG00000059769	DNAJC25	2604	9	111631334	111654351	DnaJ heat shock protein family (Hsp40) member C25 [Source:HGNC Symbol;Acc:HGNC:34187]	468	402	365	428
ENSG00000059804	SLC2A3	7252	12	7919230	8019007	solute carrier family 2 member 3 [Source:HGNC Symbol;Acc:HGNC:11007]	44	12	22	4
ENSG00000059915	PSD	5979	10	102402617	102421539	pleckstrin and Sec7 domain containing [Source:HGNC Symbol;Acc:HGNC:9507]	8	3	8	16
ENSG00000060069	CTDP1	6196	18	79679803	79754503	CTD phosphatase subunit 1 [Source:HGNC Symbol;Acc:HGNC:2498]	1710	1684	1490	1896
ENSG00000060138	YBX3	8621	12	10699089	10723323	Y-box binding protein 3 [Source:HGNC Symbol;Acc:HGNC:2428]	12953	12743	11127	14686
ENSG00000060140	STYK1	3440	12	10618923	10674318	serine/threonine/tyrosine kinase 1 [Source:HGNC Symbol;Acc:HGNC:18889]	355	207	170	126
ENSG00000060237	WNK1	17280	12	752579	911452	WNK lysine deficient protein kinase 1 [Source:HGNC Symbol;Acc:HGNC:14540]	11650	11585	8178	6071
ENSG00000060339	CCAR1	6059	10	68721012	68792377	cell division cycle and apoptosis regulator 1 [Source:HGNC Symbol;Acc:HGNC:24236]	3341	3393	3616	2847
ENSG00000060491	OGFR	4702	20	62804835	62814000	opioid growth factor receptor [Source:HGNC Symbol;Acc:HGNC:15768]	2012	2109	1323	1552
ENSG00000060558	GNA15	2753	19	3136033	3163749	G protein subunit alpha 15 [Source:HGNC Symbol;Acc:HGNC:4383]	118	111	80	145
ENSG00000060566	CREB3L3	2648	19	4153631	4173054	cAMP responsive element binding protein 3 like 3 [Source:HGNC Symbol;Acc:HGNC:18855]	0	0	0	0
ENSG00000060642	PIGV	8084	1	26787054	26800659	phosphatidylinositol glycan anchor biosynthesis class V [Source:HGNC Symbol;Acc:HGNC:26031]	170	220	227	186
ENSG00000060656	PTPRU	6682	1	29236516	29326813	protein tyrosine phosphatase receptor type U [Source:HGNC Symbol;Acc:HGNC:9683]	2113	2267	2386	2820
ENSG00000060688	SNRNP40	3887	1	31259568	31296788	small nuclear ribonucleoprotein U5 subunit 40 [Source:HGNC Symbol;Acc:HGNC:30857]	1492	1220	1231	1552
ENSG00000060749	QSER1	10908	11	32892811	32993316	glutamine and serine rich 1 [Source:HGNC Symbol;Acc:HGNC:26154]	11941	12652	15212	11591
ENSG00000060762	MPC1	1540	6	166364919	166383013	mitochondrial pyruvate carrier 1 [Source:HGNC Symbol;Acc:HGNC:21606]	2414	2420	2510	2866
ENSG00000060971	ACAA1	7106	3	38103129	38137242	acetyl-CoA acyltransferase 1 [Source:HGNC Symbol;Acc:HGNC:82]	836	888	861	980
ENSG00000061273	HDAC7	9928	12	47782722	47833132	histone deacetylase 7 [Source:HGNC Symbol;Acc:HGNC:14067]	3398	3389	2850	2754
ENSG00000061455	PRDM6	9230	5	123089241	123194266	PR/SET domain 6 [Source:HGNC Symbol;Acc:HGNC:9350]	87	80	73	79
ENSG00000061492	WNT8A	1991	5	138083990	138092365	Wnt family member 8A [Source:HGNC Symbol;Acc:HGNC:12788]	4	2	0	6
ENSG00000061656	SPAG4	2348	20	35615829	35621094	sperm associated antigen 4 [Source:HGNC Symbol;Acc:HGNC:11214]	28	20	75	73
ENSG00000061676	NCKAP1	22520	2	182909115	183038858	NCK associated protein 1 [Source:HGNC Symbol;Acc:HGNC:7666]	17266	17582	14561	12296
ENSG00000061794	MRPS35	1930	12	27710822	27756295	mitochondrial ribosomal protein S35 [Source:HGNC Symbol;Acc:HGNC:16635]	1722	1704	1834	2132
ENSG00000061918	GUCY1B1	3944	4	155758992	155807811	guanylate cyclase 1 soluble subunit beta 1 [Source:HGNC Symbol;Acc:HGNC:4687]	850	979	863	772
ENSG00000061936	SFSWAP	10158	12	131711081	131799738	splicing factor SWAP [Source:HGNC Symbol;Acc:HGNC:10790]	1466	1271	1754	1680
ENSG00000061938	TNK2	12245	3	195863364	195911945	tyrosine kinase non receptor 2 [Source:HGNC Symbol;Acc:HGNC:19297]	454	395	1138	1024
ENSG00000061987	MON2	16014	12	62466817	62600476	MON2 homolog, regulator of endosome-to-Golgi trafficking [Source:HGNC Symbol;Acc:HGNC:29177]	1869	1889	1257	954
ENSG00000062038	CDH3	6392	16	68636189	68727468	cadherin 3 [Source:HGNC Symbol;Acc:HGNC:1762]	4416	4037	2930	3280
ENSG00000062194	GPBP1	6472	5	57173948	57264679	GC-rich promoter binding protein 1 [Source:HGNC Symbol;Acc:HGNC:29520]	3641	3402	3009	2975
ENSG00000062282	DGAT2	7904	11	75759512	75801535	diacylglycerol O-acyltransferase 2 [Source:HGNC Symbol;Acc:HGNC:16940]	566	580	580	552
ENSG00000062370	ZNF112	3848	19	44326555	44367217	zinc finger protein 112 [Source:HGNC Symbol;Acc:HGNC:12892]	314	307	219	149
ENSG00000062485	CS	6401	12	56271699	56300391	citrate synthase [Source:HGNC Symbol;Acc:HGNC:2422]	6065	5748	4951	5578
ENSG00000062524	LTK	3491	15	41503637	41513887	leukocyte receptor tyrosine kinase [Source:HGNC Symbol;Acc:HGNC:6721]	6	2	4	0
ENSG00000062582	MRPS24	2607	7	43866558	43869893	mitochondrial ribosomal protein S24 [Source:HGNC Symbol;Acc:HGNC:14510]	105	110	232	267
ENSG00000062598	ELMO2	6597	20	46366050	46432985	engulfment and cell motility 2 [Source:HGNC Symbol;Acc:HGNC:17233]	1193	1080	1096	1162
ENSG00000062650	WAPL	7205	10	86435256	86521792	WAPL cohesin release factor [Source:HGNC Symbol;Acc:HGNC:23293]	4635	4926	4705	4514
ENSG00000062716	VMP1	10001	17	59707192	59842255	vacuole membrane protein 1 [Source:HGNC Symbol;Acc:HGNC:29559]	2260	2020	3353	2204
ENSG00000062725	APPBP2	9890	17	60443158	60526242	amyloid beta precursor protein binding protein 2 [Source:HGNC Symbol;Acc:HGNC:622]	1668	1518	1089	1064
ENSG00000062822	POLD1	4934	19	50384204	50418018	DNA polymerase delta 1, catalytic subunit [Source:HGNC Symbol;Acc:HGNC:9175]	3086	3148	3636	4692
ENSG00000063015	SEZ6	4946	17	28954901	29006440	seizure related 6 homolog [Source:HGNC Symbol;Acc:HGNC:15955]	0	4	2	0
ENSG00000063046	EIF4B	6028	12	53006282	53042215	eukaryotic translation initiation factor 4B [Source:HGNC Symbol;Acc:HGNC:3285]	6444	6724	9149	10985
ENSG00000063127	SLC6A16	3589	19	49289638	49325215	solute carrier family 6 member 16 [Source:HGNC Symbol;Acc:HGNC:13622]	34	48	34	18
ENSG00000063169	BICRA	7496	19	47608196	47703277	BRD4 interacting chromatin remodeling complex associated protein [Source:HGNC Symbol;Acc:HGNC:4332]	942	989	864	752
ENSG00000063176	SPHK2	6009	19	48619291	48630717	sphingosine kinase 2 [Source:HGNC Symbol;Acc:HGNC:18859]	481	545	549	647
ENSG00000063177	RPL18	3857	19	48615328	48619184	ribosomal protein L18 [Source:HGNC Symbol;Acc:HGNC:10310]	11691	11514	18795	20909
ENSG00000063180	CA11	1946	19	48637946	48646187	carbonic anhydrase 11 [Source:HGNC Symbol;Acc:HGNC:1370]	289	273	366	453
ENSG00000063241	ISOC2	4408	19	55452985	55462343	isochorismatase domain containing 2 [Source:HGNC Symbol;Acc:HGNC:26278]	1830	1778	2078	2611
ENSG00000063244	U2AF2	4040	19	55654146	55674716	U2 small nuclear RNA auxiliary factor 2 [Source:HGNC Symbol;Acc:HGNC:23156]	10703	10150	15321	15561
ENSG00000063245	EPN1	17616	19	55675226	55709858	epsin 1 [Source:HGNC Symbol;Acc:HGNC:21604]	8444	8607	6509	9526
ENSG00000063322	MED29	3839	19	39391303	39400641	mediator complex subunit 29 [Source:HGNC Symbol;Acc:HGNC:23074]	1995	2065	2821	2994
ENSG00000063438	AHRR	9480	5	321714	438291	aryl hydrocarbon receptor repressor [Source:HGNC Symbol;Acc:HGNC:346]	3	11	18	10
ENSG00000063515	GSC2	2625	22	19146993	19150292	goosecoid homeobox 2 [Source:HGNC Symbol;Acc:HGNC:4613]	2	0	0	0
ENSG00000063587	ZNF275	8147	X	153334147	153360110	zinc finger protein 275 [Source:HGNC Symbol;Acc:HGNC:13069]	0	0	2	6
ENSG00000063601	MTMR1	6328	X	150692971	150765108	myotubularin related protein 1 [Source:HGNC Symbol;Acc:HGNC:7449]	3764	3989	2742	2548
ENSG00000063660	GPC1	6522	2	240435663	240468076	glypican 1 [Source:HGNC Symbol;Acc:HGNC:4449]	1798	1857	2272	3149
ENSG00000063761	ADCK1	5293	14	77800109	77935014	aarF domain containing kinase 1 [Source:HGNC Symbol;Acc:HGNC:19038]	455	453	348	410
ENSG00000063854	HAGH	5839	16	1795620	1827157	hydroxyacylglutathione hydrolase [Source:HGNC Symbol;Acc:HGNC:4805]	262	203	1036	836
ENSG00000063978	RNF4	6836	4	2462220	2515857	ring finger protein 4 [Source:HGNC Symbol;Acc:HGNC:10067]	1956	1963	1935	1915
ENSG00000064012	CASP8	7237	2	201233443	201361836	caspase 8 [Source:HGNC Symbol;Acc:HGNC:1509]	669	689	706	673
ENSG00000064042	LIMCH1	10862	4	41359607	41700044	LIM and calponin homology domains 1 [Source:HGNC Symbol;Acc:HGNC:29191]	6595	6205	5144	4659
ENSG00000064102	INTS13	3059	12	26905181	26938326	integrator complex subunit 13 [Source:HGNC Symbol;Acc:HGNC:20174]	1999	1982	1419	2036
ENSG00000064115	TM7SF3	5504	12	26971579	27014434	transmembrane 7 superfamily member 3 [Source:HGNC Symbol;Acc:HGNC:23049]	1826	1961	1646	1759
ENSG00000064195	DLX3	2715	17	49990005	49995224	distal-less homeobox 3 [Source:HGNC Symbol;Acc:HGNC:2916]	709	785	543	659
ENSG00000064199	SPA17	5159	11	124673844	124697518	sperm autoantigenic protein 17 [Source:HGNC Symbol;Acc:HGNC:11210]	28	36	51	37
ENSG00000064201	TSPAN32	3797	11	2301997	2318204	tetraspanin 32 [Source:HGNC Symbol;Acc:HGNC:13410]	4	4	1	0
ENSG00000064205	CCN5	4981	20	44714844	44728509	cellular communication network factor 5 [Source:HGNC Symbol;Acc:HGNC:12770]	62	30	50	36
ENSG00000064218	DMRT3	2697	9	976655	991732	doublesex and mab-3 related transcription factor 3 [Source:HGNC Symbol;Acc:HGNC:13909]	0	2	0	0
ENSG00000064225	ST3GAL6	6304	3	98732236	98821201	ST3 beta-galactoside alpha-2,3-sialyltransferase 6 [Source:HGNC Symbol;Acc:HGNC:18080]	59	47	71	23
ENSG00000064270	ATP2C2	7352	16	84368527	84464187	ATPase secretory pathway Ca2+ transporting 2 [Source:HGNC Symbol;Acc:HGNC:29103]	916	788	1091	1122
ENSG00000064300	NGFR	4141	17	49495293	49515008	nerve growth factor receptor [Source:HGNC Symbol;Acc:HGNC:7809]	3	10	6	2
ENSG00000064309	CDON	19924	11	125955796	126063335	cell adhesion associated, oncogene regulated [Source:HGNC Symbol;Acc:HGNC:17104]	474	437	469	324
ENSG00000064313	TAF2	16255	8	119730774	119832863	TATA-box binding protein associated factor 2 [Source:HGNC Symbol;Acc:HGNC:11536]	2736	2331	1677	1491
ENSG00000064393	HIPK2	15622	7	139561570	139777998	homeodomain interacting protein kinase 2 [Source:HGNC Symbol;Acc:HGNC:14402]	2406	2540	3513	3084
ENSG00000064419	TNPO3	4676	7	128954180	129055173	transportin 3 [Source:HGNC Symbol;Acc:HGNC:17103]	7112	6928	4671	5772
ENSG00000064489	BORCS8-MEF2B	1929	19	19145569	19192158	BORCS8-MEF2B readthrough [Source:HGNC Symbol;Acc:HGNC:39979]	0	0	2	1
ENSG00000064490	RFXANK	2503	19	19192229	19201869	regulatory factor X associated ankyrin containing protein [Source:HGNC Symbol;Acc:HGNC:9987]	1467	1479	1834	2380
ENSG00000064545	TMEM161A	3281	19	19119169	19138513	transmembrane protein 161A [Source:HGNC Symbol;Acc:HGNC:26020]	1712	1701	1601	2151
ENSG00000064547	LPAR2	2975	19	19623655	19628930	lysophosphatidic acid receptor 2 [Source:HGNC Symbol;Acc:HGNC:3168]	2470	2299	2784	3831
ENSG00000064601	CTSA	8633	20	45890144	45898949	cathepsin A [Source:HGNC Symbol;Acc:HGNC:9251]	3076	2879	4118	4432
ENSG00000064607	SUGP2	8468	19	18990888	19034023	SURP and G-patch domain containing 2 [Source:HGNC Symbol;Acc:HGNC:18641]	3669	3709	5408	4169
ENSG00000064651	SLC12A2	10653	5	128083766	128189677	solute carrier family 12 member 2 [Source:HGNC Symbol;Acc:HGNC:10911]	10733	11458	8031	8181
ENSG00000064652	SNX24	3474	5	122843439	123029354	sorting nexin 24 [Source:HGNC Symbol;Acc:HGNC:21533]	2055	1737	1433	1343
ENSG00000064655	EYA2	3618	20	46894624	47188844	EYA transcriptional coactivator and phosphatase 2 [Source:HGNC Symbol;Acc:HGNC:3520]	1068	1061	1074	1327
ENSG00000064666	CNN2	3640	19	1026586	1039068	calponin 2 [Source:HGNC Symbol;Acc:HGNC:2156]	9830	9451	5675	6879
ENSG00000064687	ABCA7	9591	19	1039997	1065572	ATP binding cassette subfamily A member 7 [Source:HGNC Symbol;Acc:HGNC:37]	784	837	1461	1025
ENSG00000064692	SNCAIP	7266	5	122311354	122464219	synuclein alpha interacting protein [Source:HGNC Symbol;Acc:HGNC:11139]	32	46	67	47
ENSG00000064703	DDX20	8778	1	111754832	111775602	DEAD-box helicase 20 [Source:HGNC Symbol;Acc:HGNC:2743]	1838	1867	1562	1678
ENSG00000064726	BTBD1	4066	15	83016423	83067252	BTB domain containing 1 [Source:HGNC Symbol;Acc:HGNC:1120]	2248	2052	2151	2035
ENSG00000064763	FAR2	13684	12	29149016	29341121	fatty acyl-CoA reductase 2 [Source:HGNC Symbol;Acc:HGNC:25531]	122	88	118	70
ENSG00000064787	BCAS1	10533	20	53936777	54070594	brain enriched myelin associated protein 1 [Source:HGNC Symbol;Acc:HGNC:974]	30	21	0	16
ENSG00000064835	POU1F1	1566	3	87259404	87276584	POU class 1 homeobox 1 [Source:HGNC Symbol;Acc:HGNC:9210]	0	0	0	0
ENSG00000064886	CHI3L2	3295	1	111200771	111243440	chitinase 3 like 2 [Source:HGNC Symbol;Acc:HGNC:1933]	194	241	229	279
ENSG00000064932	SBNO2	6610	19	1107637	1174268	strawberry notch homolog 2 [Source:HGNC Symbol;Acc:HGNC:29158]	6086	6498	6611	7433
ENSG00000064933	PMS1	5448	2	189784085	189877629	PMS1 homolog 1, mismatch repair system component [Source:HGNC Symbol;Acc:HGNC:9121]	743	716	667	656
ENSG00000064961	HMG20B	3857	19	3572777	3579088	high mobility group 20B [Source:HGNC Symbol;Acc:HGNC:5002]	2586	2683	4532	4801
ENSG00000064989	CALCRL	7309	2	187341964	187448460	calcitonin receptor like receptor [Source:HGNC Symbol;Acc:HGNC:16709]	24	4	0	1
ENSG00000064995	TAF11	6904	6	34877462	34889192	TATA-box binding protein associated factor 11 [Source:HGNC Symbol;Acc:HGNC:11544]	959	967	2044	2246
ENSG00000064999	ANKS1A	9967	6	34889255	35091406	ankyrin repeat and sterile alpha motif domain containing 1A [Source:HGNC Symbol;Acc:HGNC:20961]	4360	4549	4364	4052
ENSG00000065000	AP3D1	9317	19	2100988	2164468	adaptor related protein complex 3 subunit delta 1 [Source:HGNC Symbol;Acc:HGNC:568]	11257	11031	8924	11780
ENSG00000065029	ZNF76	6782	6	35258909	35295985	zinc finger protein 76 [Source:HGNC Symbol;Acc:HGNC:13149]	2226	2149	2478	2269
ENSG00000065054	NHERF2	3516	16	2025356	2039026	NHERF family PDZ scaffold protein 2 [Source:HGNC Symbol;Acc:HGNC:11076]	1575	1830	2270	3112
ENSG00000065057	NTHL1	2430	16	2039815	2047866	nth like DNA glycosylase 1 [Source:HGNC Symbol;Acc:HGNC:8028]	287	291	498	631
ENSG00000065060	BLTP3A	9567	6	34792083	34877514	bridge-like lipid transfer protein family member 3A [Source:HGNC Symbol;Acc:HGNC:21216]	7070	6770	3882	3563
ENSG00000065135	GNAI3	9044	1	109548615	109600195	G protein subunit alpha i3 [Source:HGNC Symbol;Acc:HGNC:4387]	12350	11804	9340	11190
ENSG00000065150	IPO5	9664	13	97953658	98024296	importin 5 [Source:HGNC Symbol;Acc:HGNC:6402]	16091	16119	13871	16279
ENSG00000065154	OAT	3388	10	124397303	124418976	ornithine aminotransferase [Source:HGNC Symbol;Acc:HGNC:8091]	7284	7223	5702	5468
ENSG00000065183	WDR3	10276	1	117929720	117966543	WD repeat domain 3 [Source:HGNC Symbol;Acc:HGNC:12755]	2317	2471	3058	2839
ENSG00000065243	PKN2	6897	1	88684222	88836255	protein kinase N2 [Source:HGNC Symbol;Acc:HGNC:9406]	5340	5435	4479	3565
ENSG00000065268	WDR18	2283	19	984332	998438	WD repeat domain 18 [Source:HGNC Symbol;Acc:HGNC:17956]	2047	2109	2209	3292
ENSG00000065308	TRAM2	7047	6	52497408	52577060	translocation associated membrane protein 2 [Source:HGNC Symbol;Acc:HGNC:16855]	4200	3864	2172	2232
ENSG00000065320	NTN1	6415	17	9021510	9244000	netrin 1 [Source:HGNC Symbol;Acc:HGNC:8029]	2290	2221	1438	1321
ENSG00000065325	GLP2R	5696	17	9822206	9892099	glucagon like peptide 2 receptor [Source:HGNC Symbol;Acc:HGNC:4325]	138	122	44	71
ENSG00000065328	MCM10	5456	10	13161558	13211110	minichromosome maintenance 10 replication initiation factor [Source:HGNC Symbol;Acc:HGNC:18043]	989	995	867	778
ENSG00000065357	DGKA	10098	12	55927319	55954027	diacylglycerol kinase alpha [Source:HGNC Symbol;Acc:HGNC:2849]	185	162	144	107
ENSG00000065361	ERBB3	11711	12	56076799	56103505	erb-b2 receptor tyrosine kinase 3 [Source:HGNC Symbol;Acc:HGNC:3431]	2642	2527	2204	2246
ENSG00000065371	ROPN1	4518	3	123968521	123992178	rhophilin associated tail protein 1 [Source:HGNC Symbol;Acc:HGNC:17692]	2	0	4	2
ENSG00000065413	ANKRD44	12826	2	196967017	197311173	ankyrin repeat domain 44 [Source:HGNC Symbol;Acc:HGNC:25259]	231	256	233	136
ENSG00000065427	KARS1	4051	16	75627474	75648643	lysyl-tRNA synthetase 1 [Source:HGNC Symbol;Acc:HGNC:6215]	12672	12265	9956	13455
ENSG00000065457	ADAT1	6118	16	75596868	75623300	adenosine deaminase tRNA specific 1 [Source:HGNC Symbol;Acc:HGNC:228]	2312	2282	1859	1727
ENSG00000065485	PDIA5	4067	3	123067025	123225227	protein disulfide isomerase family A member 5 [Source:HGNC Symbol;Acc:HGNC:24811]	653	622	1081	877
ENSG00000065491	TBC1D22B	3462	6	37257772	37332970	TBC1 domain family member 22B [Source:HGNC Symbol;Acc:HGNC:21602]	1110	1133	808	1013
ENSG00000065518	NDUFB4	1877	3	120596328	120602507	NADH:ubiquinone oxidoreductase subunit B4 [Source:HGNC Symbol;Acc:HGNC:7699]	1583	1371	3023	2031
ENSG00000065526	SPEN	15120	1	15836095	15940456	spen family transcriptional repressor [Source:HGNC Symbol;Acc:HGNC:17575]	5631	5994	5150	3249
ENSG00000065534	MYLK	31537	3	123610049	123884332	myosin light chain kinase [Source:HGNC Symbol;Acc:HGNC:7590]	316	286	163	109
ENSG00000065548	ZC3H15	3026	2	186486253	186509361	zinc finger CCCH-type containing 15 [Source:HGNC Symbol;Acc:HGNC:29528]	3621	3698	4410	4938
ENSG00000065559	MAP2K4	5709	17	12020829	12143830	mitogen-activated protein kinase kinase 4 [Source:HGNC Symbol;Acc:HGNC:6844]	2134	1937	1753	2313
ENSG00000065600	PACC1	2917	1	212363928	212414901	proton activated chloride channel 1 [Source:HGNC Symbol;Acc:HGNC:25593]	1057	1164	914	1092
ENSG00000065609	SNAP91	6651	6	83552880	83709691	synaptosome associated protein 91 [Source:HGNC Symbol;Acc:HGNC:14986]	0	0	0	0
ENSG00000065613	SLK	8107	10	103967140	104029233	STE20 like kinase [Source:HGNC Symbol;Acc:HGNC:11088]	5796	5296	4214	3740
ENSG00000065615	CYB5R4	9621	6	83859656	83967423	cytochrome b5 reductase 4 [Source:HGNC Symbol;Acc:HGNC:20147]	1757	1612	1505	1676
ENSG00000065618	COL17A1	6989	10	104031286	104085880	collagen type XVII alpha 1 chain [Source:HGNC Symbol;Acc:HGNC:2194]	64	24	11	4
ENSG00000065621	GSTO2	9926	10	104268873	104304950	glutathione S-transferase omega 2 [Source:HGNC Symbol;Acc:HGNC:23064]	15	9	23	18
ENSG00000065665	SEC61A2	3916	10	12129637	12169961	SEC61 translocon subunit alpha 2 [Source:HGNC Symbol;Acc:HGNC:17702]	188	220	318	327
ENSG00000065675	PRKCQ	3285	10	6427143	6580301	protein kinase C theta [Source:HGNC Symbol;Acc:HGNC:9410]	231	231	202	182
ENSG00000065717	TLE2	4141	19	2997639	3047635	TLE family member 2, transcriptional corepressor [Source:HGNC Symbol;Acc:HGNC:11838]	1325	1278	1787	1887
ENSG00000065802	ASB1	7407	2	238426742	238452250	ankyrin repeat and SOCS box containing 1 [Source:HGNC Symbol;Acc:HGNC:16011]	1679	1647	1220	1321
ENSG00000065809	FAM107B	7019	10	14518557	14774897	family with sequence similarity 107 member B [Source:HGNC Symbol;Acc:HGNC:23726]	1641	1576	1107	1346
ENSG00000065833	ME1	3338	6	83210402	83431051	malic enzyme 1 [Source:HGNC Symbol;Acc:HGNC:6983]	3496	3595	4623	5391
ENSG00000065882	TBC1D1	9556	4	37891084	38139175	TBC1 domain family member 1 [Source:HGNC Symbol;Acc:HGNC:11578]	7091	7088	4331	6223
ENSG00000065883	CDK13	24780	7	39950121	40099580	cyclin dependent kinase 13 [Source:HGNC Symbol;Acc:HGNC:1733]	4515	4470	3690	3311
ENSG00000065911	MTHFD2	11443	2	74186172	74217565	methylenetetrahydrofolate dehydrogenase (NADP+ dependent) 2, methenyltetrahydrofolate cyclohydrolase [Source:HGNC Symbol;Acc:HGNC:7434]	5441	5025	5160	5617
ENSG00000065923	SLC9A7	9980	X	46599251	46759118	solute carrier family 9 member A7 [Source:HGNC Symbol;Acc:HGNC:17123]	4276	4317	3207	2966
ENSG00000065970	FOXJ2	6297	12	8032716	8055517	forkhead box J2 [Source:HGNC Symbol;Acc:HGNC:24818]	2024	1978	1528	1565
ENSG00000065978	YBX1	3395	1	42682418	42703805	Y-box binding protein 1 [Source:HGNC Symbol;Acc:HGNC:8014]	41925	40945	46100	62283
ENSG00000065989	PDE4A	6762	19	10416773	10469630	phosphodiesterase 4A [Source:HGNC Symbol;Acc:HGNC:8780]	819	790	517	604
ENSG00000066027	PPP2R5A	3942	1	212285410	212361853	protein phosphatase 2 regulatory subunit B'alpha [Source:HGNC Symbol;Acc:HGNC:9309]	4016	3977	3312	3680
ENSG00000066032	CTNNA2	7535	2	79185231	80648861	catenin alpha 2 [Source:HGNC Symbol;Acc:HGNC:2510]	0	0	4	0
ENSG00000066044	ELAVL1	6962	19	7958573	8005659	ELAV like RNA binding protein 1 [Source:HGNC Symbol;Acc:HGNC:3312]	2701	3039	4271	4930
ENSG00000066056	TIE1	6705	1	43300982	43323108	tyrosine kinase with immunoglobulin like and EGF like domains 1 [Source:HGNC Symbol;Acc:HGNC:11809]	0	0	0	0
ENSG00000066084	DIP2B	10351	12	50504985	50748657	disco interacting protein 2 homolog B [Source:HGNC Symbol;Acc:HGNC:29284]	4776	4902	2644	2094
ENSG00000066117	SMARCD1	4903	12	50085200	50100707	SWI/SNF related, matrix associated, actin dependent regulator of chromatin, subfamily d, member 1 [Source:HGNC Symbol;Acc:HGNC:11106]	1579	1622	1479	1441
ENSG00000066135	KDM4A	5184	1	43650149	43705518	lysine demethylase 4A [Source:HGNC Symbol;Acc:HGNC:22978]	1277	1278	929	1080
ENSG00000066136	NFYC	5990	1	40691648	40771603	nuclear transcription factor Y subunit gamma [Source:HGNC Symbol;Acc:HGNC:7806]	3871	3734	3448	3604
ENSG00000066185	ZMYND12	2181	1	42430329	42456253	zinc finger MYND-type containing 12 [Source:HGNC Symbol;Acc:HGNC:21192]	48	8	4	22
ENSG00000066230	SLC9A3	5754	5	470456	524449	solute carrier family 9 member A3 [Source:HGNC Symbol;Acc:HGNC:11073]	10	11	62	26
ENSG00000066248	NGEF	4647	2	232878701	233013256	neuronal guanine nucleotide exchange factor [Source:HGNC Symbol;Acc:HGNC:7807]	78	79	95	152
ENSG00000066279	ASPM	11994	1	197084121	197146694	assembly factor for spindle microtubules [Source:HGNC Symbol;Acc:HGNC:19048]	3476	3830	3217	1749
ENSG00000066294	CD84	9255	1	160541095	160579516	CD84 molecule [Source:HGNC Symbol;Acc:HGNC:1704]	0	0	0	0
ENSG00000066322	ELOVL1	2506	1	43363398	43368074	ELOVL fatty acid elongase 1 [Source:HGNC Symbol;Acc:HGNC:14418]	4179	3945	3731	4446
ENSG00000066336	SPI1	2040	11	47354860	47378547	Spi-1 proto-oncogene [Source:HGNC Symbol;Acc:HGNC:11241]	0	0	0	0
ENSG00000066379	POLR1H	3672	6	30058899	30064909	RNA polymerase I subunit H [Source:HGNC Symbol;Acc:HGNC:13182]	98	115	345	225
ENSG00000066422	ZBTB11	15511	3	101648889	101677135	zinc finger and BTB domain containing 11 [Source:HGNC Symbol;Acc:HGNC:16740]	1178	1205	1563	935
ENSG00000066427	ATXN3	9624	14	92044496	92106621	ataxin 3 [Source:HGNC Symbol;Acc:HGNC:7106]	687	589	508	608
ENSG00000066455	GOLGA5	3205	14	92794305	92839947	golgin A5 [Source:HGNC Symbol;Acc:HGNC:4428]	1544	1329	1480	1485
ENSG00000066468	FGFR2	18813	10	121478332	121598458	fibroblast growth factor receptor 2 [Source:HGNC Symbol;Acc:HGNC:3689]	602	607	395	316
ENSG00000066557	LRRC40	2843	1	70144805	70205579	leucine rich repeat containing 40 [Source:HGNC Symbol;Acc:HGNC:26004]	1857	1775	1299	1240
ENSG00000066583	ISOC1	1942	5	129094749	129114028	isochorismatase domain containing 1 [Source:HGNC Symbol;Acc:HGNC:24254]	1232	1271	1396	1537
ENSG00000066629	EML1	8987	14	99737693	99942060	EMAP like 1 [Source:HGNC Symbol;Acc:HGNC:3330]	4	2	2	4
ENSG00000066651	TRMT11	5722	6	125986479	126203817	tRNA methyltransferase 11 homolog [Source:HGNC Symbol;Acc:HGNC:21080]	1058	862	1398	1038
ENSG00000066654	THUMPD1	6501	16	20702816	20742084	THUMP domain containing 1 [Source:HGNC Symbol;Acc:HGNC:23807]	889	921	1121	1004
ENSG00000066697	MSANTD3	3289	9	100427143	100451734	Myb/SANT DNA binding domain containing 3 [Source:HGNC Symbol;Acc:HGNC:23370]	716	701	967	996
ENSG00000066735	KIF26A	7041	14	104136454	104180894	kinesin family member 26A [Source:HGNC Symbol;Acc:HGNC:20226]	8	4	8	4
ENSG00000066739	ATG2B	14256	14	96279195	96363341	autophagy related 2B [Source:HGNC Symbol;Acc:HGNC:20187]	641	542	492	448
ENSG00000066777	ARFGEF1	11059	8	67173511	67343781	ADP ribosylation factor guanine nucleotide exchange factor 1 [Source:HGNC Symbol;Acc:HGNC:15772]	3762	3634	2266	2213
ENSG00000066827	ZFAT	8900	8	134477788	134713049	zinc finger and AT-hook domain containing [Source:HGNC Symbol;Acc:HGNC:19899]	314	438	469	552
ENSG00000066855	MTFR1	4629	8	65644734	65771261	mitochondrial fission regulator 1 [Source:HGNC Symbol;Acc:HGNC:29510]	2585	2778	2794	3256
ENSG00000066923	STAG3	6142	7	100177563	100214387	stromal antigen 3 [Source:HGNC Symbol;Acc:HGNC:11356]	69	51	77	73
ENSG00000066926	FECH	11128	18	57544377	57586732	ferrochelatase [Source:HGNC Symbol;Acc:HGNC:3647]	1500	1397	1357	1481
ENSG00000066933	MYO9A	20319	15	71822291	72118577	myosin IXA [Source:HGNC Symbol;Acc:HGNC:7608]	2275	2475	1491	1176
ENSG00000067057	PFKP	7774	10	3066333	3137718	phosphofructokinase, platelet [Source:HGNC Symbol;Acc:HGNC:8878]	7916	7132	9537	9080
ENSG00000067064	IDI1	4294	10	1039152	1049119	isopentenyl-diphosphate delta isomerase 1 [Source:HGNC Symbol;Acc:HGNC:5387]	3208	3438	5164	5429
ENSG00000067066	SP100	14134	2	230415942	230545606	SP100 nuclear antigen [Source:HGNC Symbol;Acc:HGNC:11206]	853	770	747	571
ENSG00000067082	KLF6	6139	10	3775996	3785281	KLF transcription factor 6 [Source:HGNC Symbol;Acc:HGNC:2235]	8048	6853	8326	7479
ENSG00000067113	PLPP1	1935	5	55424854	55534969	phospholipid phosphatase 1 [Source:HGNC Symbol;Acc:HGNC:9228]	201	144	129	138
ENSG00000067141	NEO1	8137	15	73051710	73305205	neogenin 1 [Source:HGNC Symbol;Acc:HGNC:7754]	1430	1521	1088	1232
ENSG00000067167	TRAM1	4131	8	70573218	70608416	translocation associated membrane protein 1 [Source:HGNC Symbol;Acc:HGNC:20568]	13145	12964	8508	8579
ENSG00000067177	PHKA1	6350	X	72578814	72714319	phosphorylase kinase regulatory subunit alpha 1 [Source:HGNC Symbol;Acc:HGNC:8925]	1641	1759	1261	1138
ENSG00000067182	TNFRSF1A	4205	12	6328757	6342114	TNF receptor superfamily member 1A [Source:HGNC Symbol;Acc:HGNC:11916]	2494	2566	3276	3991
ENSG00000067191	CACNB1	7096	17	39173453	39197702	calcium voltage-gated channel auxiliary subunit beta 1 [Source:HGNC Symbol;Acc:HGNC:1401]	51	36	160	133
ENSG00000067208	EVI5	14589	1	92508696	92792404	ecotropic viral integration site 5 [Source:HGNC Symbol;Acc:HGNC:3501]	1105	950	873	921
ENSG00000067221	STOML1	10458	15	73978926	73994622	stomatin like 1 [Source:HGNC Symbol;Acc:HGNC:14560]	186	164	138	128
ENSG00000067225	PKM	8572	15	72199029	72231819	pyruvate kinase M1/2 [Source:HGNC Symbol;Acc:HGNC:9021]	51453	50869	52942	70562
ENSG00000067248	DHX29	4890	5	55256055	55307694	DExH-box helicase 29 [Source:HGNC Symbol;Acc:HGNC:15815]	1934	1738	1287	1323
ENSG00000067334	DNTTIP2	7518	1	93866284	93879918	deoxynucleotidyltransferase terminal interacting protein 2 [Source:HGNC Symbol;Acc:HGNC:24013]	3881	3752	4269	4899
ENSG00000067365	METTL22	8254	16	8621683	8649654	methyltransferase 22, Kin17 lysine [Source:HGNC Symbol;Acc:HGNC:28368]	256	207	317	293
ENSG00000067369	TP53BP1	12976	15	43403061	43510728	tumor protein p53 binding protein 1 [Source:HGNC Symbol;Acc:HGNC:11999]	1600	1672	1508	1149
ENSG00000067445	TRO	6716	X	54920462	54931431	trophinin [Source:HGNC Symbol;Acc:HGNC:12326]	0	0	4	9
ENSG00000067533	RRP15	7877	1	218285293	218337983	ribosomal RNA processing 15 homolog [Source:HGNC Symbol;Acc:HGNC:24255]	1308	1301	1516	1395
ENSG00000067560	RHOA	4805	3	49359139	49412998	ras homolog family member A [Source:HGNC Symbol;Acc:HGNC:667]	8209	7907	8115	10385
ENSG00000067596	DHX8	10760	17	43483865	43610338	DEAH-box helicase 8 [Source:HGNC Symbol;Acc:HGNC:2749]	2651	2611	1692	2227
ENSG00000067606	PRKCZ	7695	1	2050411	2185395	protein kinase C zeta [Source:HGNC Symbol;Acc:HGNC:9412]	721	651	703	922
ENSG00000067704	IARS2	4135	1	220094132	220148041	isoleucyl-tRNA synthetase 2, mitochondrial [Source:HGNC Symbol;Acc:HGNC:29685]	7336	7809	9465	11009
ENSG00000067715	SYT1	9463	12	78863993	79452008	synaptotagmin 1 [Source:HGNC Symbol;Acc:HGNC:11509]	22	23	6	8
ENSG00000067798	NAV3	13278	12	77324641	78213010	neuron navigator 3 [Source:HGNC Symbol;Acc:HGNC:15998]	12	2	2	0
ENSG00000067829	IDH3G	2699	X	153785766	153794512	isocitrate dehydrogenase (NAD(+)) 3 non-catalytic subunit gamma [Source:HGNC Symbol;Acc:HGNC:5386]	2538	2433	4063	4324
ENSG00000067840	PDZD4	4341	X	153802166	153830565	PDZ domain containing 4 [Source:HGNC Symbol;Acc:HGNC:21167]	24	46	9	32
ENSG00000067842	ATP2B3	10469	X	153517642	153582939	ATPase plasma membrane Ca2+ transporting 3 [Source:HGNC Symbol;Acc:HGNC:816]	0	4	0	2
ENSG00000067900	ROCK1	13369	18	20944612	21111813	Rho associated coiled-coil containing protein kinase 1 [Source:HGNC Symbol;Acc:HGNC:10251]	4721	4883	3240	3053
ENSG00000067955	CBFB	4652	16	67028984	67101058	core-binding factor subunit beta [Source:HGNC Symbol;Acc:HGNC:1539]	3462	3514	3710	3350
ENSG00000067992	PDK3	17456	X	24465244	24550466	pyruvate dehydrogenase kinase 3 [Source:HGNC Symbol;Acc:HGNC:8811]	2777	2875	2734	3077
ENSG00000068001	HYAL2	4421	3	50317790	50322782	hyaluronidase 2 [Source:HGNC Symbol;Acc:HGNC:5321]	670	670	768	896
ENSG00000068024	HDAC4	14179	2	239048168	239401654	histone deacetylase 4 [Source:HGNC Symbol;Acc:HGNC:14063]	1274	1216	1039	1063
ENSG00000068028	RASSF1	3683	3	50329782	50340980	Ras association domain family member 1 [Source:HGNC Symbol;Acc:HGNC:9882]	2424	2443	2840	3256
ENSG00000068078	FGFR3	4848	4	1793293	1808872	fibroblast growth factor receptor 3 [Source:HGNC Symbol;Acc:HGNC:3690]	108	106	164	89
ENSG00000068079	IFI35	1958	17	43006740	43014456	interferon induced protein 35 [Source:HGNC Symbol;Acc:HGNC:5399]	308	298	274	320
ENSG00000068097	HEATR6	7043	17	60041008	60078922	HEAT repeat containing 6 [Source:HGNC Symbol;Acc:HGNC:24076]	546	603	464	537
ENSG00000068120	COASY	4032	17	42561467	42566277	Coenzyme A synthase [Source:HGNC Symbol;Acc:HGNC:29932]	1271	1285	1334	1455
ENSG00000068137	PLEKHH3	4803	17	42667914	42676994	pleckstrin homology, MyTH4 and FERM domain containing H3 [Source:HGNC Symbol;Acc:HGNC:26105]	1946	1854	2009	2106
ENSG00000068305	MEF2A	7128	15	99565417	99716488	myocyte enhancer factor 2A [Source:HGNC Symbol;Acc:HGNC:6993]	2029	1843	1514	1235
ENSG00000068308	OTUD5	3333	X	48922024	48958386	OTU deubiquitinase 5 [Source:HGNC Symbol;Acc:HGNC:25402]	3349	3421	2919	3592
ENSG00000068323	TFE3	4207	X	49028726	49043410	transcription factor binding to IGHM enhancer 3 [Source:HGNC Symbol;Acc:HGNC:11752]	5185	4691	4688	5668
ENSG00000068354	TBC1D25	3966	X	48539714	48562609	TBC1 domain family member 25 [Source:HGNC Symbol;Acc:HGNC:8092]	1165	1236	970	1185
ENSG00000068366	ACSL4	9971	X	109624244	109733403	acyl-CoA synthetase long chain family member 4 [Source:HGNC Symbol;Acc:HGNC:3571]	1500	1718	1117	1142
ENSG00000068383	INPP5A	3739	10	132537787	132783480	inositol polyphosphate-5-phosphatase A [Source:HGNC Symbol;Acc:HGNC:6076]	1294	1413	796	972
[truncated: 33,016 more rows]

## Sheet: 231 KD-CtBP vs CTRL 
gene_id	gene_name	gene_chr	gene_start	gene_end	gene_strand	gene_length	gene_biotype	gene_description	tf_family	KD-CtBP-1_readcount	KD-CtBP-2_readcount	Ctrl-2_readcount	Ctrl-1_readcount	log2FoldChange	pvalue	padj
[truncated: 5,503 more rows]

[truncated: 1 more sheets: 468 KD-P4HB vs CTRL ]
