# Supplementary material for: CtBP Promoted P4HB Mediates SLC7A11 Maturation to Confer Ferroptosis Resistance in Triple-Negative Breast Cancer
Source: Research Square preprint supplement (doi:10.21203/rs.3.rs-8199205/v1), 2025-12-04
Supplement: Supplementary file 2 [file 63459c879cb0674e412e5378.docx]

**List of construct primers**

| F-pLKO.1-ERO1A-sg1 | CCGGCTACAAGTGTGAAAGAATTCTCGAGAATTCTTTCACACTTGTAGTTTTTG |
| --- | --- |
| R-pLKO.1-ERO1A-sg1 | AATTCAAAAACTACAAGTGTGAAAGAATTCTCGAGAATTCTTTCACACTTGTAG |
| F-pLKO.1-ERO1A-sg2 | CCGGGTGACTACTTTAGGTATTACTCGAGTAATACCTAAAGTAGTCACTTTTTG |
| R-pLKO.1-ERO1A-sg2 | AATTCAAAAAGTGACTACTTTAGGTATTACTCGAGTAATACCTAAAGTAGTCAC |
| F-lentiv2-P4HB-sg1 | CACCAGGACTCGACTGCCAACGAGG |
| R-lentiv2-P4HB-sg1 | AAACCCTCGTTGGCAGTCGAGTCCC |
| F-lentiv2-P4HB-sg2 | CACCACAAGTACAAGCCCGAATCGG |
| R-lentiv2-P4HB-sg2 | AAACCCGATTCGGGCTTGTACTTGC |
| F-PCDH-P4HB | ATCTCGAGCTCAAGCTTCGGAATTCATGCTGCGCCGCGCTCTGCTGTG |
| R-PCDH-P4HB | TGTAATCCAGAGGTTGATTGGATCCTCAATGATGATGATGATGATGG |
| F-PCDH-P4HB-MUTsite1 | GCCCCTTGGTCTGGCCACTCCAAGGCTCTGGCCCCTGAGTATGCCAAAGC |
| R-PCDH-P4HB-MUTsite1 | CCAGAGCCTTGGAGTGGCCAGACCAAGGGGCATAGAACTCCACCAG |
| F-PCDH-P4HB-MUTsite2 | TATGCCCCATGGTCTGGTCACTCCAAACAGTTGGCTCCCATTTGGGA |
| R-PCDH-P4HB-MUTsite2 | GTCTTTGTGGAGTTCTATGCCCCATGGTCTGGTCACTCCAAACAGTTG |
| R-PCDH-P4HB-ΔKDEL | TGAGTTTTTGTTCGGGCCCAAGCTTCACAGCTTTCTGATCATCGTCT |
| F-pLKO.1-CtBP1/2-sg | CCGGGGGAGGACCTGGAGAAGTTCTCGAGAACTTCTCCAGGTCCTCCCTTTTTG |
| R-pLKO.1-CtBP1/2-sg | AATTCAAAAAGGGAGGACCTGGAGAAGTTCTCGAGAACTTCTCCAGGTCCTCCC |

**List of qPCR primers**

| F-CtBP2 | TTCAAGGCCCTGAGAGTGAT |
| --- | --- |
| R-CtBP2 | GAGTCCGCTGTCTCTTCCAC |
| F-CtBP1 | ACGCTGTGCCACATCCTGAACC |
| R-CtBP1 | AAGAGCACGTTGAAGCCGAAGG |
| F-βACTIN | CACCATTGGCAATGAGCGGTTC |
| R-βACTIN | AGGTCTTTGCGGATGTCCACGT |
| F-SOD1 | TTGCATCATTGGCCGCACACT |
| R-SOD1 | ATTACACCACAAGCCAAACGACT |
| F-SOD2 | AATAGCTGGGATTACAGGTGCAT |
| R-SOD2 | CCAGACGGATCACTTGAGGTCAG |
| F-CAT | CTCCAAATTACTACCCCAACAGC |
| R-CAT | ATCATTGGCAGTGTTGAATCTCC |
| F-NRF2 | CACATCCAGTCAGAAACCAGTGG |
| R-NRF2 | GGAATGTCTGCGCCAAAAGCTG |
| F-GPX1 | CTTCTTGGACAATTGCGCCATG |
| R-GPX1 | CCGAGAAGGCATACACCGAC |
| F-GPX2 | CTACCTGAAGGACAAGCTCCC |
| R-GPX2 | CTTCTCAAAGTTCCAGGCCACA |
| F-GPX4 | ACAAGAACGGCTGCGTGGTGAA |
| R-GPX4 | GCCACACACTTGTGGAGCTAGA |
| F-SLC7A11 | ATGCAGTGGCAGTGACCTTT |
| R-SLC7A11 | GGCAACAAAGATCGGAACTG |
| F-SLC3A2 | CCAGAAGGATGATGTCGCTCAG |
| R-SLC3A2 | GAGTAAGGTCCAGAATGACACGG |
| F-GCLC | GGAAGTGGATGTGGACACCAGA |
| R-GCLC | GCTTGTAGTCAGGATGGTTTGCG |
| F-GCLM | TCTTGCCTCCTGCTGTGTGATG |
| R-GCLM | TTGGAAACTTGCTTCAGAAAGCAG |
| F-PRDX1 | TTCACTGACAAACATGGGGAA |
| R-PRDX1 | CGCTCACTTCTGCTTGGAGA |
| F-ATF3 | CGCTGGAATCAGTCACTGTCAG |
| R-ATF3 | CTTGTTTCGGCACTTTGCAGCTG |
| F-MAP3K14 | GGAATACCTCCACTCACGAAGG |
| R-MAP3K14 | CTGTGAGCAAGGACTTTCCCAG |
| F-PRKAA2 | CCAGAGAATGTCCTGTTGGATGC |
| R-PRKAA2 | CTGAGATGACTTCAGGTGCTGC |
| F-SLC39A14 | CTGGACCACATGATTCCTCAGC |
| R-SLC39A14 | AGAGTAGCGGACACCTTTCAGC |
| F-AKT1S1 | CGGTCATCAGATGAGGAGAATGG |
| R-AKT1S1 | GCTTCTGGAAGTCGCTGGTGTT |
| F-AKR1C3 | CCGAAGCAAGATTGCAGATGGC |
| R-AKR1C3 | GTGAGTTTTCCAAGGCTGGTCG |
| F-NT5DC2 | AGCCTGGAGTTTGACCAAGCAC |
| R--NT5DC2 | CAGGACAGCAAACGTCTCATCC |
| F-NQO1 | CCTGCCATTCTGAAAGGCTGGT |
| R-NQO1 | GTGGTGATGGAAAGCACTGCCT |
| F-PANX2 | CCTCACCATCCTGAGCCGAAAC |
| R-PANX2 | GACGGTGCCATCCCTCAAAACT |
| 1. CDC25A | TCTGGACAGCTCCTCTCGTCAT |
| R-CDC25A | ACTTCCAGGTGGAGACTCCTCT |
| F-SREBF1 | ACTTCTGGAGGCATCGCAAGCA |
| R-SREBF1 | AGGTTCCAGAGGAGGCTACAAG |
| F-FZD7 | GTCTTCAGCGTGCTCTACACAG |
| R-FZD7 | ACGGCATAGCTCTTGCACGTCT |
| F-P4HB | TCACCAAGGAGAACCTGCTGGA |
| R-P4HB | GGCAAGAACAGCAGGATGTGAG |
| F-PDIA2 | GCTGAGGAGTTTGGTGTGAC |
| R-PDIA2 | AGAAGCCAATGACCACTAGGT |
| F-PDIA3 | GTCAGCCACTTGAAGAAGCAGG |
| R-PDIA3 | TAGGAACTCGGAGTGAGCCTCA |
| F-PDIA4 | CCAGCAGGTTTGATGTGAGTGG |
| R-PDIA4 | GGAGACTTCTCTGACCTTGGCA |
| F-PDIA5 | GGAGCCAAAGATGTTGTCCACC |
| 1. PDIA5 | GAAATGCGGCATCATCCTCTTGC |
| F-PDIA6 | TCAGAAAGGCGAGTCTCCTGTG |
| R-PDIA6 | CCTCTTGGCAATGTCCTCGTTG |
| F-TXNDC5 | GTAGACTGCACTGCTGAACGGA |
| R-TXNDC5 | TCGTCTTTCGCTTGGCTCAGGA |
| F-TXNDC12 | GGACATAATGGGCTTGGAAAGGG |
| R-TXNDC12 | CTTTGCAAGCTCCACACCAGGA |
| F-DHFR | CATGGTCTGGATAGTTGGTGGC |
| R-DHFR | GTGTCACTTTCAAAGTCTTGCATG |
| F-GCH1 | GCCATGCAGTTCTTCACCAAGG |
| R-GCH1 | ATGGAACCAAGTGATGCTCACAC |
| F-DHODH | GAGGACATTGCCAGTGTGGTCA |
| R-DHODH | TTCCCACTCAGCCCTCCTGTTT |
