# Supplementary material for: CtBP Promoted P4HB Mediates SLC7A11 Maturation to Confer Ferroptosis Resistance in Triple-Negative Breast Cancer
Source: Research Square preprint supplement (doi:10.21203/rs.3.rs-8199205/v1), 2025-12-04
Supplement: Supplementary file 4 [file cd5f8e3492792eaa08d26c62.xlsx]

## Sheet: Sheet1
231-ko-ctbp_vs_231
Feature Imformation										%FILLED			MEAN RATIO	LOG MEAN RATIO		Wilcoxon test				MEAN
COMP ID	COMPOUND Name	SUPER META PATHWAY	SUB META PATHWAY	ACQUISITION METHOD	PUBCHEM ID	CAS ID	KEGG ID	HMDB ID		231	231-ko-ctbp					P-VALUE	BH ADJUSTED	Q-VALUE		231	231-ko-ctbp
101001	alanine	Amino Acid	Alanine and Aspartate Metabolism	POSa	5950	56-41-7	C00041	HMDB0000161		100	100		1.449	1.01989		0.030639	0.0579456	0.0384443		240366774	348282308
101002	asparagine			POSa	6267	70-47-3	C00152	HMDB0000168		100	100		11.358	1.15977		0.00507487	0.0145062	0.00962422		4493890	51041236
101003	aspartate			POSa	5960	56-84-8	C00049	HMDB0000191		100	100		1.209	1.01022		0.0655522	0.10856	0.0720245		115969677	140182613
101004	hydroxyasparagine**			POSa			C03124	HMDB0032332		100	100		1.468	1.03179		0.0453276	0.0810716	0.0537872		121346	178194
101006	N-acetylalanine			NEGa	88064	97-69-8		HMDB0000766		100	100		3.986	1.0928		0.00507487	0.0145062	0.00962422		2338976	9324300
101007	N-acetylasparagine			POSa	99715	4033-40-3		HMDB0006028		100	100		2.795	1.07977		0.00507487	0.0145062	0.00962422		280111	782770
101008	N-acetylaspartate (NAA)			NEGb	65065	997-55-7	C01042	HMDB0000812		100	100		3.105	1.06248		0.0453276	0.0810716	0.0537872		2592265	8050032
104001	homoserine lactone		Aspartate family (OAA derived)	POSa			C02926	HMDB0029387		100	100		0.846	0.987613		0.0655522	0.10856	0.0720245		1279542	1081880
109013	phosphothreonine			POSa						83	100		1.64	1.03573		0.127538	0.198164	0.131473		83391	136757
105001	creatine		Creatine Metabolism	POSa	586	57-00-1	C00300	HMDB0000064		100	100		1.354	1.01373		0.0655522	0.10856	0.0720245		855977968	1159267483
105003	creatinine			POSa	588	60-27-5	C00791	HMDB0000562		100	100		1.87	1.03799		0.00507487	0.0145062	0.00962422		8489517	15873408
107002	4-hydroxyglutamate		Glutamate Metabolism	POSa			C03079	HMDB0002273		83	100		6.069	1.1566		0.00499812	0.0145062	0.00962422		101193	614165
107003	alpha-ketoglutaramate*			NEGb	48	18465-19-5	C00940	HMDB0001552		100	100		7.573	1.18078		0.00507487	0.0145062	0.00962422		69890	529260
107004	beta-citrylglutamate			NEGa				HMDB0013220		100	100		1.277	1.01188		0.173485	0.252563	0.167564		114123824	145731778
107005	carboxyethyl-GABA			POSa	2572	4386-03-2		HMDB0002201		100	83		1.468	1.03001		0.688404	0.778455	0.516469		91350	134145
107009	glutamate			POSa	33032	56-86-0	C00025	HMDB0000148		100	100		2.725	1.04808		0.00507487	0.0145062	0.00962422		906814254	2471344627
107010	glutamate, gamma-methyl ester			POSa	68662	1499-55-4		HMDB0061715		100	100		3.114	1.07995		0.00507487	0.0145062	0.00962422		1114499	3470715
107011	glutamine			POSa	5961	56-85-9	C00064	HMDB0000641		100	100		3.52	1.07916		0.00507487	0.0145062	0.00962422		6398132	22521781
107012	N-acetyl-aspartyl-glutamate (NAAG)			POSa	188803	3106-85-2	C12270	HMDB0001067		100	100		1.386	1.01958		0.0130652	0.0283987	0.0188412		4242394	5879158
107013	N-acetylglutamate			POSa	70914	1188-37-0	C00624	HMDB0001138		100	100		2.182	1.04419		0.00507487	0.0145062	0.00962422		27968726	61015266
107014	N-acetylglutamine			POSa	182230	2490-97-3		HMDB0006029		100	100		3.099	1.07999		0.00507487	0.0145062	0.00962422		1135880	3519701
107018	S-1-pyrroline-5-carboxylate			POSa	440162	64199-88-8	C03912	HMDB0001301		100	100		1.338	1.02087		0.00823902	0.0204668	0.0135788		814113	1089574
624030	4-hydroxybutyrate (GHB)		Glutamate family (alpha-ketoglutarate derived)	POSa			C01991	HMDB0000710		100	100		1.514	1.03239		0.00823902	0.0204668	0.0135788		428428	648445
108004	4-hydroxy-nonenal-glutathione		Glutathione Metabolism	NEGa						0	100		NA	NA		0.00962172	0.0223081	0.0148004		NA	108208
108005	5-oxoproline			NEGa	7405	98-79-3	C01879	HMDB0000267		100	100		2.127	1.03923		0.00507487	0.0145062	0.00962422		65382047	139040819
108006	CoA-glutathione*			NEGa						83	100		5.145	1.12951		0.00499812	0.0145062	0.00962422		224683	1155897
108009	cysteine-glutathione disulfide			POSa	53477713	13081-14-6		HMDB0000656		100	100		2.854	1.07637		0.00507487	0.0145062	0.00962422		881333	2515552
108010	cysteinylglycine			POSa	439498	19246-18-5	C01419	HMDB0000078		100	100		5.223	1.12687		0.00507487	0.0145062	0.00962422		374773	1957322
108012-1	glutathione, oxidized (GSSG)			POSa						100	100		11.172	1.15312		0.00507487	0.0145062	0.00962422		5848042	65334783
108013	glutathione, reduced (GSH)			POSa	124886	70-18-8	C00051	HMDB0000125		100	100		4.828	1.08108		0.00507487	0.0145062	0.00962422		213191640	1029364586
108015	S-(1,2-dicarboxyethyl)glutathione			NEGa						100	100		7.462	1.14649		0.00507487	0.0145062	0.00962422		815134	6082360
108016	S-lactoylglutathione			POSa			C03451	HMDB0001066		100	17		0.065	0.80871		0.00277843	0.0145062	0.00962422		504354	32665
108017	S-methylglutathione			POSa						33	100		21.363	1.28264		0.00366455	0.0145062	0.00962422		42228	902135
108018	S-nitrosoglutathione (GSNO)			POSa				HMDB0004645		100	100		3.73	1.08941		0.00507487	0.0145062	0.00962422		1801645	6720691
109004	betaine		Glycine, Serine and Threonine Metabolism	POSa	248	6915-17-9		HMDB0000043		100	100		1.365	1.01608		0.0926958	0.148789	0.0987144		72366806	98809724
109006	dimethylglycine			POSa	673	1118-68-9	C01026	HMDB0000092		100	100		1.868	1.04751		0.00507487	0.0145062	0.00962422		343010	640798
109007	glycine			POSa	750	56-40-6	C00037	HMDB0000123		100	100		1.917	1.03396		0.0130652	0.0283987	0.0188412		105847149	202905703
109009	N-acetylglycine			POSa	10972	543-24-8		HMDB0000532		100	100		1.762	1.04009		0.00823902	0.0204668	0.0135788		748708	1319167
109010	N-acetylserine			POSa	65249	16354-58-8		HMDB0002931		100	100		4.962	1.09805		0.00507487	0.0145062	0.00962422		7758664	38500930
109011	N-acetylthreonine			NEGa	152204	17093-74-2		HMDB0062557		100	100		3.339	1.07853		0.00507487	0.0145062	0.00962422		3611445	12060294
109015	serine			POSa	5951	56-45-1	C00065	HMDB0000187		100	100		1.639	1.02698		0.0926958	0.148789	0.0987144		39402198	64589494
109016	threonine			POSa	6288	72-19-5	C00188	HMDB0000167		100	100		1.609	1.02394		0.030639	0.0579456	0.0384443		369199818	594098133
110002	4-guanidinobutanoate		Guanidino and Acetamido Metabolism	POSa	500	463-00-3	C01035	HMDB0003464		100	100		2.962	1.07843		0.00507487	0.0145062	0.00962422		921657	2730334
111002	1-methyl-4-imidazoleacetate		Histidine Metabolism	POSa	75810	2625-49-2	C05828	HMDB0002820		67	100		1.364	1.02233		0.0636694	0.10856	0.0720245		273235	372801
111003	1-methyl-5-imidazoleacetate			POSa				HMDB0004988		100	100		1.313	1.01738		0.229766	0.314735	0.208812		1490277	1957283
111005	1-methylhistidine			POSa	92105	332-80-9	C01152	HMDB0000001		100	100		2.631	1.06207		0.00507487	0.0145062	0.00962422		5314028	13983599
111006	1-ribosyl-imidazoleacetate*			POSa	440569	29605-99-0	C05131	HMDB0002331		83	100		3.619	1.11747		0.00499812	0.0145062	0.00962422		43058	155844
111007	3-methylhistidine			POSa	64969	368-16-1	C01152	HMDB0000479		100	100		1.866	1.04105		0.00823902	0.0204668	0.0135788		1747656	3261868
111008	4-imidazoleacetate			POSa	96215	645-65-8	C02835	HMDB0002024		100	100		2.687	1.07233		0.00507487	0.0145062	0.00962422		473482	1272455
111010	carnosine			POSa	439224	305-84-0	C00386	HMDB0000033		100	100		0.965	0.995279		1	1	0.663454		927729	895192
111012	formiminoglutamate			POSa	439233	816-90-0	C00439	HMDB0000854		100	100		1.485	1.03223		0.0926958	0.148789	0.0987144		58091	86290
111014	histidine			NEGa	6274	71-00-1	C00135	HMDB0000177		100	100		1.135	1.00635		0.688921	0.778455	0.516469		36246976	41149791
111015	histidine methyl ester			POSa						100	100		0.526	0.952056		0.00507487	0.0145062	0.00962422		883533	464858
111018	imidazole lactate			POSa	459122	876-19-7	C05132	HMDB0002320		100	100		0.741	0.98037		0.030639	0.0579456	0.0384443		12944785	9594193
111019	imidazole propionate			POSa	70630	1074-59-5	C20522	HMDB0002271		100	100		1.94	1.04489		0.00507487	0.0145062	0.00962422		1322124	2565295
111024	N-acetylhistidine			POSa	75619	2497-02-1	C02997	HMDB0032055		100	100		0.928	0.992364		0.688921	0.778455	0.516469		384260	356428
112001	N-lactoyl isoleucine		Leucine, Isoleucine and Valine Metabolism	NEGa	85541231			HMDB0062180		100	100		5.026	1.12186		0.00507487	0.0145062	0.00962422		514841	2587806
112002	N-lactoyl leucine			NEGa	57329455			HMDB0062176		100	100		4.899	1.13127		0.00507487	0.0145062	0.00962422		290383	1422726
112003	N-lactoyl valine			NEGa	131770417			HMDB0062181		100	100		5.0	1.11297		0.00507487	0.0145062	0.00962422		1446409	7232186
112004	2,3-dihydroxy-2-methylbutyrate			NEGb	301941	14868-24-7		HMDB0029576		100	100		1.182	1.00716		0.936186	0.970286	0.64374		3169680	3747154
112007	2-hydroxy-3-methylvalerate			NEGa	10796774	488-15-3		HMDB0000317		100	100		1.917	1.04968		0.0453276	0.0810716	0.0537872		336120	644484
112009	2-methylbutyrylcarnitine (C5)			POSa	6426901	31023-25-3		HMDB0000378		100	100		0.58	0.962368		0.00507487	0.0145062	0.00962422		2662232	1544241
112013	3-methyl-2-oxobutyrate			NEGb	49	759-05-7	C00141	HMDB0000019		100	100		1.526	1.03018		0.229766	0.314735	0.208812		9398915	14339885
112014	3-methyl-2-oxovalerate			NEGa	439286	24809-08-3	C00671	HMDB0000491		100	100		1.866	1.03841		0.030639	0.0579456	0.0384443		6021907	11236034
112018	4-methyl-2-oxopentanoate			NEGa	70	816-66-0	C00233	HMDB0000695		100	100		1.721	1.03429		0.0655522	0.10856	0.0720245		5331944	9176354
112021	alpha-hydroxyisocaproate			NEGa	92779	498-36-2		HMDB0000665		100	100		0.623	0.966238		0.030639	0.0579456	0.0384443		1816905	1131868
112022	alpha-hydroxyisovalerate			NEGb	99823	4026-18-0		HMDB0000407		100	100		2.529	1.07004		0.00823902	0.0204668	0.0135788		876642	2216683
112023	beta-hydroxyisovalerate			NEGb	69362	625-08-1		HMDB0000754		100	100		0.421	0.930473		0.00507487	0.0145062	0.00962422		315423	132657
112026	ethylmalonate			NEGb	11756	601-75-2		HMDB0000622		83	100		8.126	1.17691		0.00499812	0.0145062	0.00962422		117089	951490
112027	isobutyrylcarnitine (C4)			POSa	168379	25518-49-4		HMDB0000736		100	83		0.398	0.93783		0.00812704	0.0204668	0.0135788		5805203	2309014
112029	isoleucine			POSa	6306	73-32-5	C00407	HMDB0000172		100	100		1.703	1.02498		0.00507487	0.0145062	0.00962422		961690912	1637826867
112030	isovalerate (i5:0)			NEGa	10430	503-74-2	C08262	HMDB0000718		100	50		0.543	0.951311		0.00433691	0.0145062	0.00962422		278166	150936
112031	isovalerylcarnitine (C5)			POSa	6426851	31023-24-2		HMDB0000688		100	100		0.461	0.94732		0.00507487	0.0145062	0.00962422		2368034	1092564
112033	isovalerylglycine			NEGa				HMDB0000678		83	100		1.336	1.02693		0.0921251	0.148789	0.0987144		68474	91463
112034	leucine			POSa	6106	61-90-5	C00123	HMDB0000687		100	100		1.671	1.02469		0.00507487	0.0145062	0.00962422		731519961	1222712020
112035	methylsuccinate			NEGb	6950476	2174-58-5		HMDB0001844		100	100		1.772	1.03992		0.00823902	0.0204668	0.0135788		362063	641436
112037	N-acetylisoleucine			NEGa	7036275	3077-46-1		HMDB0061684		83	100		1.141	1.00951		0.228951	0.314735	0.208812		196121	223761
112038	N-acetylleucine			NEGa	70912	1188-21-2	C02710	HMDB0011756		100	100		1.808	1.04676		0.030639	0.0579456	0.0384443		183098	330953
112039	N-acetylvaline			NEGa	66789	96-81-1		HMDB0011757		100	100		2.207	1.06257		0.00507487	0.0145062	0.00962422		222780	491772
112045	tiglylcarnitine (C5:1-DC)			POSa	91825636	64681-36-3		HMDB0002366		100	100		0.526	0.949523		0.030639	0.0579456	0.0384443		322022	169516
112047	valine			POSa	6287	72-18-4	C00183	HMDB0000883		100	100		1.6	1.02308		0.0130652	0.0283987	0.0188412		324877628	519828283
113001	2-aminoadipate		Lysine Metabolism	NEGb	92136	1118-90-7	C00956	HMDB0000510		0	100		NA	NA		0.00962172	0.0223081	0.0148004		NA	159642
113003	5-(galactosylhydroxy)-L-lysine			POSa						100	100		0.83	0.981652		0.575174	0.688449	0.456754		333364	276776
113004	5-aminovalerate			POSa	138	660-88-8	C00431	HMDB0003355		100	100		2.504	1.0567		0.00507487	0.0145062	0.00962422		6450750	16153306
113005	5-hydroxylysine			POSa	3032849	1190-94-9	C16741	HMDB0000450		100	100		1.099	1.00285		0.936186	0.970286	0.64374		127296	139907
113008	fructosyllysine			POSa	131751634	21291-40-7		HMDB0034879		100	100		1.097	1.00329		0.936186	0.970286	0.64374		399126	437954
113012	lysine			POSa			C00047	HMDB0000182		100	100		1.072	1.00258		0.810181	0.877463	0.582156		162795495	174587357
113013	N,N,N-trimethyl-5-aminovalerate			POSa						100	100		1.287	1.01456		0.0926958	0.148789	0.0987144		9660946	12429723
113019	N6,N6,N6-trimethyllysine			POSa	440120	19253-88-4	C03793	HMDB0001325		100	100		0.797	0.9849		0.0453276	0.0810716	0.0537872		10671888	8503650
113020	N6,N6-dimethyllysine			POSa	4478779		C05545	HMDB0013287		100	100		0.603	0.96168		0.0202406	0.0414072	0.0274717		2487930	1500283
113021	N6-acetyllysine			NEGb	92832	692-04-6	C02727	HMDB0000206		100	100		1.459	1.0291		0.0655522	0.10856	0.0720245		145442	212189
113024	N6-methyllysine			POSa	164795	1188-07-4	C02728	HMDB0002038		100	100		0.918	0.993174		0.378478	0.48254	0.320143		1135244	1042353
113026	N-acetyl-cadaverine			POSa	189087	32343-73-0		HMDB0002284		33	100		10.396	1.21943		0.00366455	0.0145062	0.00962422		37144	386132
113027	pipecolate			POSa	849	535-75-1	C00408	HMDB0000070		100	100		2.442	1.06305		0.00507487	0.0145062	0.00962422		1126096	2750414
113028	saccharopine			NEGb	160556	997-68-2	C00449	HMDB0000279		100	100		1.64	1.04428		0.0130652	0.0283987	0.0188412		50795	83307
114001	2,3-dihydroxy-5-methylthio-4-pentenoate (DMTPA)*		Methionine, Cysteine, SAM and Taurine Metabolism	NEGa	154603736	2226539-09-7		HMDB0240388		0	83		NA	NA		0.0284407	0.0572471	0.0379808		NA	89558
114002	2-hydroxy-4-(methylthio)butanoic acid			NEGb	11427	120-91-2		HMDB0037115		100	100		0.963	0.99492		0.688921	0.778455	0.516469		2554982	2461706
114007	cystathionine			POSa	439258	56-88-2	C02291	HMDB0000099		100	100		10.872	1.1911		0.00507487	0.0145062	0.00962422		248489	2701565
114008	cysteine			POSa	5862	52-90-4	C00097	HMDB0000574		100	100		2.156	1.04637		0.00507487	0.0145062	0.00962422		24328266	52458962
114010	cysteine sulfinic acid			POSa	1549098	1115-65-7	C00606	HMDB0000996		83	67		1.696	1.05007		0.369976	0.48254	0.320143		51042	86568
114012	homocysteine			POSa	91552	6027-13-0	C00155	HMDB0000742		100	100		5.638	1.13813		0.00507487	0.0145062	0.00962422		157264	886708
114013	hypotaurine			POSa	107812	300-84-5	C00519	HMDB0000965		100	100		1.553	1.02398		0.0655522	0.10856	0.0720245		17586475	27318108
114015	methionine			POSa	6137	63-68-3	C00073	HMDB0000696		100	100		1.568	1.02168		0.0202406	0.0414072	0.0274717		266727648	418302157
114016	methionine sulfone			POSa	445282	7314-32-1		HMDB0062174		100	100		2.022	1.04755		0.00507487	0.0145062	0.00962422		1193402	2413119
114017	methionine sulfoxide			POSa	158980	3226-65-1	C02989	HMDB0002005		100	100		1.726	1.03579		0.00507487	0.0145062	0.00962422		3724850	6429447
114018	N-acetylcysteine			POSa			C06809	HMDB0001890		100	100		4.664	1.12203		0.00507487	0.0145062	0.00962422		183169	854264
114019	N-acetylmethionine			NEGa	448580	65-82-7	C02712	HMDB0011745		100	100		4.325	1.10146		0.00507487	0.0145062	0.00962422		1454761	6291903
114020	N-acetylmethionine sulfoxide			POSa						83	100		4.885	1.14321		0.00499812	0.0145062	0.00962422		60281	294442
114021	N-acetyltaurine			NEGa	159864	19213-70-8		HMDB0240253		100	100		1.841	1.04003		0.0453276	0.0810716	0.0537872		1904558	3505518
114022	N-formylmethionine			NEGa	439750	4289-98-9	C03145	HMDB0001015		100	100		1.766	1.0374		0.0130652	0.0283987	0.0188412		1618122	2857928
114025	S-adenosylhomocysteine (SAH)			NEGa			C00021	HMDB0000939		100	100		9.688	1.18148		0.00507487	0.0145062	0.00962422		269434	2610166
114026	S-adenosylmethionine (SAM)			POSa	34756	485-80-3	C00019	HMDB0001185		100	100		1.576	1.0296		0.00823902	0.0204668	0.0135788		2518443	3969465
114028	S-methylcysteine			POSa	24417	1187-84-4		HMDB0002108		100	100		2.131	1.05886		0.00507487	0.0145062	0.00962422		358910	764744
114029	S-methylcysteine sulfoxide			POSa	82142	32726-14-0		HMDB0029432		100	100		2.584	1.08176		0.00507487	0.0145062	0.00962422		177801	459396
114032	taurine			NEGa	1123	107-35-7	C00245	HMDB0000251		100	100		1.661	1.02593		0.0453276	0.0810716	0.0537872		53332231	88572359
115001	N-lactoyl phenylalanine		Phenylalanine Metabolism	NEGa	11075454			HMDB0062175		100	100		5.407	1.12892		0.00507487	0.0145062	0.00962422		516508	2792678
115006	N-acetylphenylalanine			NEGa	74839	2018-61-3	C03519	HMDB0000512		100	100		1.637	1.03971		0.0202406	0.0414072	0.0274717		118149	193437
115011	phenylalanine			POSa	6140	63-91-2	C00079	HMDB0000159		100	100		1.576	1.02149		0.00823902	0.0204668	0.0135788		596356680	939630874
115012	phenyllactate (PLA)			NEGa	3848	828-01-3	C01479	HMDB0000779		100	100		1.317	1.01526		0.378478	0.48254	0.320143		3279158	4317549
116001	(N(1) + N(8))-acetylspermidine		Polyamine Metabolism	POSa	496	14278-49-0	C00612	HMDB0001276		100	100		0.08	0.858918		0.00507487	0.0145062	0.00962422		74513865	5955347
116002	4-acetamidobutanoate			NEGa	18189	3025-96-5	C02946	HMDB0003681		67	100		1.636	1.04064		0.02948	0.0579456	0.0384443		166378	272190
116003	5-methylthioadenosine (MTA)			POSa	439176	2457-80-9	C00170	HMDB0001173		100	100		1.67	1.03033		0.00507487	0.0145062	0.00962422		18008886	30066391
116007	diacetylspermidine*			POSa	389613			HMDB0041947		100	100		0.219	0.901275		0.00507487	0.0145062	0.00962422		6464787	1414900
116010	N(1)-acetylspermine			POSa			C02567	HMDB0001186		100	100		0.019	0.761709		0.00507487	0.0145062	0.00962422		18441126	349732
116011	N1,N12-diacetylspermine			POSa	132680	61345-83-3	C03413	HMDB0002172		100	0		NA	NA		0.00962172	0.0223081	0.0148004		2891054	NA
116012	N-acetyl-isoputreanine*			POSa						100	100		2.567	1.07265		0.00507487	0.0145062	0.00962422		346903	890416
116013	N-acetylputrescine			POSa	122356	18233-70-0	C02714	HMDB0002064		100	100		6.149	1.13085		0.00507487	0.0145062	0.00962422		769373	4730995
116014	putrescine			POSa	1045	110-60-1	C00134	HMDB0001414		100	100		1.253	1.01423		0.173485	0.252563	0.167564		524808	657813
116015	spermidine			POSa	1102	124-20-9	C00315	HMDB0001257		100	100		0.157	0.901705		0.00507487	0.0145062	0.00962422		347727255	54435183
116016	spermine			POSb	1103	71-44-3	C00750	HMDB0001256		100	100		0.276	0.920303		0.00507487	0.0145062	0.00962422		35894913	9892563
117013	C-glycosyltryptophan		Tryptophan Metabolism	POSa	10981970	180509-18-6		HMDB0240296		100	100		1.526	1.03502		0.030639	0.0579456	0.0384443		118556	180906
117020	indolelactate			NEGa	676157	7417-65-4	C02043	HMDB0000671		100	100		1.239	1.01091		0.688921	0.778455	0.516469		3789552	4693952
117025	kynurenine			POSa	161166	2922-83-0	C00328	HMDB0000684		100	100		1.376	1.02168		0.0926958	0.148789	0.0987144		899976	1238306
117029	N-formylkynurenine			POSa			C02406	HMDB0001200		100	100		1.923	1.05033		0.00823902	0.0204668	0.0135788		362990	697993
117030	oxindolylalanine			POSa						100	100		0.859	0.987577		0.173485	0.252563	0.167564		440926	378792
117034	tryptophan			POSa	6305	73-22-3	C00078	HMDB0000929		100	100		1.403	1.01654		0.0926958	0.148789	0.0987144		119084180	167119897
117035	tryptophan betaine			POSa	442106	487-58-1	C09213	HMDB0061115		100	100		1.43	1.02756		0.297953	0.400255	0.26555		158912	227222
118001	N-lactoyl tyrosine		Tyrosine Metabolism	NEGa	22167491			HMDB0062177		100	100		3.688	1.09477		0.00507487	0.0145062	0.00962422		781852	2883419
118002	3-(4-hydroxyphenyl)lactate			NEGa	9378	306-23-0	C03672	HMDB0000755		100	100		2.301	1.04889		0.00507487	0.0145062	0.00962422		13133748	30225594
118026	N-acetyltyrosine			NEGa	68310	537-55-3	C01657	HMDB0000866		100	100		1.375	1.02656		0.0655522	0.10856	0.0720245		70220	96548
118027	N-formylphenylalanine			NEGa	759256	13200-85-6		HMDB0240317		100	100		2.335	1.07609		0.00507487	0.0145062	0.00962422		71743	167520
118029	O-methyltyrosine			POSa			C07921	HMDB0014903		100	100		0.577	0.959317		0.00507487	0.0145062	0.00962422		1253742	723411
118033	phenol sulfate			NEGa	74426	937-34-8	C02180	HMDB0060015		100	83		0.402	0.930636		0.00499812	0.0145062	0.00962422		142202	57107
118037	tyrosine			POSa	6057	60-18-4	C00082	HMDB0000158		100	100		1.879	1.0317		0.00507487	0.0145062	0.00962422		232186732	436260052
119005	arginine		Urea cycle; Arginine and Proline Metabolism	POSa	6322	74-79-3	C00062	HMDB0000517		100	100		2.468	1.0495		0.00507487	0.0145062	0.00962422		92275782	227693858
119006	argininosuccinate			POSa	16950	2387-71-5	C03406	HMDB0000052		100	100		13.899	1.22429		0.00507487	0.0145062	0.00962422		165934	2306329
119007	citrulline			POSa	9750	372-75-8	C00327	HMDB0000904		100	100		0.149	0.896519		0.00507487	0.0145062	0.00962422		86446262	12905636
119008	dimethylarginine (SDMA + ADMA)			POSa	169148	30344-00-4		HMDB0003334		100	100		0.648	0.972437		0.00823902	0.0204668	0.0135788		10747689	6965344
119011	homoarginine			POSa	9085	156-86-5	C01924	HMDB0000670		100	100		1.47	1.02845		0.030639	0.0579456	0.0384443		1374218	2019663
119013	trans-4-hydroxyproline			POSa	5810	51-35-4	C01157	HMDB0000725		100	100		1.587	1.02451		0.00823902	0.0204668	0.0135788		65535599	104000797
119017	N,N,N-trimethyl-alanylproline betaine (TMAP)			POSa	134218393	2177265-93-7		HMDB0240365		100	100		1.011	0.999584		0.936186	0.970286	0.64374		1070481	1082472
119020	N-acetylarginine			POSa	67427	155-84-0		HMDB0004620		100	100		2.579	1.08505		0.00507487	0.0145062	0.00962422		82926	213829
119023	N-acetylproline			POSa	66141	68-95-1		HMDB0094701		100	100		0.992	1.00083		0.936186	0.970286	0.64374		318410	316002
119024	N-alpha-acetylornithine			POSa			C00437	HMDB0003357		100	100		0.321	0.902968		0.00507487	0.0145062	0.00962422		259912	83427
119025	N-delta-acetylornithine			NEGa	439232	6205-08-9	C00437	HMDB0003357		100	100		1.201	1.01138		0.47117	0.580615	0.385211		1528796	1836413
119027	N-methylproline			POSa	643474	475-11-6		HMDB0094696		83	100		1.685	1.03932		0.0129066	0.0283987	0.0188412		384094	647083
119028	N-monomethylarginine			POSa	132862	17035-90-4	C03884	HMDB0029416		100	83		0.282	0.905687		0.00499812	0.0145062	0.00962422		1066237	300235
119030	ornithine			POSa	6262	3184-13-2	C00077	HMDB0000214		100	100		0.73	0.981275		0.0130652	0.0283987	0.0188412		35090015	25627766
119031	proline			POSa	145742	147-85-3	C00148	HMDB0000162		100	100		1.299	1.01246		0.0453276	0.0810716	0.0537872		950566445	1234788878
119032	pro-hydroxy-pro			POSa	11902892	18684-24-7		HMDB0006695		100	100		3.994	1.09899		0.00507487	0.0145062	0.00962422		677408	2705595
119034	urea			POSa	1176	57-13-6	C00086	HMDB0000294		67	33		0.11	0.853256		0.0608077	0.10753	0.0713412		1660329	182050
1116144	N-glycolylneuraminate	Carbohydrate	Aminosugar Metabolism	POSa	123802	1113-83-3	C03410	HMDB0000833		100	100		1.678	1.04015		0.00823902	0.0204668	0.0135788		145967	244916
203004	erythronate*			NEGb	2781043	13752-84-6		HMDB0000613		100	100		5.053	1.09494		0.00507487	0.0145062	0.00962422		18973854	95878108
203007	glucuronate			NEGb	444791	70021-34-0	C00191	HMDB0000127		100	100		5.305	1.14534		0.00507487	0.0145062	0.00962422		100565	533543
203008	N-acetyl-beta-glucosaminylamine			POSa			C01239	HMDB0001104		100	17		0.59	0.955609		0.00277843	0.0145062	0.00962422		74362	43908
203009	N-acetyl-glucosamine 1-phosphate			NEGb	440272	6866-69-9	C04256	HMDB0001367		100	100		0.786	0.981946		0.229766	0.314735	0.208812		1471580	1157236
203010	N-acetylglucosamine 6-phosphate			NEGb	439219	73495-11-1		HMDB0002817		100	100		0.406	0.940171		0.00823902	0.0204668	0.0135788		1954500	793942
203012	N-acetylglucosamine/N-acetylgalactosamine			POSa	439174	7512-17-6	C00140	HMDB0000215		100	100		0.516	0.952577		0.00507487	0.0145062	0.00962422		2218193	1145245
203014	N-acetylglucosaminylasparagine			POSa	123826	2776-93-4	C04540	HMDB0000489		100	100		1.385	1.02012		0.0655522	0.10856	0.0720245		1932021	2676715
203016	N-acetylneuraminate			POSa	445063	19342-33-7	C19910	HMDB0000230		100	100		1.657	1.02829		0.00823902	0.0204668	0.0135788		12586642	20858742
204004	lactose		Disaccharides and Oligosaccharides	NEGb			C00243	HMDB0000186		100	100		0.619	0.965329		0.030639	0.0579456	0.0384443		2463256	1524392
205002-2	fructose		Fructose, Mannose and Galactose Metabolism	NEGb	439709	53188-23-1	C02336	HMDB0000660		100	100		0.874	0.983292		0.229766	0.314735	0.208812		111791	97696
205003	galactitol (dulcitol)			NEGb	11850	608-66-2	C01697	HMDB0000107		100	100		1.314	1.02079		0.173485	0.252563	0.167564		190886	250776
205004	galactonate			NEGb	128869	13382-27-9	C00880	HMDB0000565		100	100		4.765	1.1144		0.00507487	0.0145062	0.00962422		423207	2016763
205005	galactose 1-phosphate			NEGb	123912	2255-14-3	C00446	HMDB0000645		100	100		3.921	1.12319		0.00507487	0.0145062	0.00962422		72811	285454
205007	mannitol/sorbitol			NEGb	6251	69-65-8	C00392	HMDB0000765		100	100		1.216	1.0137		0.575174	0.688449	0.456754		1607770	1954503
205009	mannose 6-phosphate			NEGb			C00275	HMDB0001078		33	100		3.343	1.10863		0.00366455	0.0145062	0.00962422		105221	351723
207003	2-phosphoglycerate		Glycolysis, Gluconeogenesis, and Pyruvate Metabolism	NEGb			C00631	HMDB0003391		100	100		0.794	0.976466		0.297953	0.400255	0.26555		302504	240265
207004	3-phosphoglycerate			NEGa	724	820-11-1	C00597	HMDB0000807		100	100		0.12	0.874016		0.00507487	0.0145062	0.00962422		9240051	1107587
207005	dihydroxyacetone phosphate (DHAP)			POSa	668	57-04-5	C00111	HMDB0001473		100	100		0.881	0.994335		0.810181	0.877463	0.582156		2364502	2083434
207007	Isobar: hexose diphosphates			NEGa	10267	34693-15-7	C05378	HMDB0001058		100	100		0.572	0.961693		0.0130652	0.0283987	0.0188412		3413601	1950918
207009-2	glucose			NEGb	64689	492-61-5	C00221	HMDB0000122		100	100		1.755	1.05058		0.00507487	0.0145062	0.00962422		79378	139288
207011	glucose 6-phosphate			NEGb	5958	56-73-5	C00092	HMDB0001401		100	100		4.831	1.12016		0.00507487	0.0145062	0.00962422		707552	3418062
207013	glycerate			NEGb	439194	473-81-4	C00258	HMDB0000139		100	100		0.825	0.980709		0.378478	0.48254	0.320143		296587	244650
207015	lactate			NEGa	107689	79-33-4	C00186	HMDB0000190		100	100		1.551	1.02265		0.229766	0.314735	0.208812		187365956	290615084
207016	phosphoenolpyruvate (PEP)			NEGa	1005	138-08-9	C00074	HMDB0000263		100	100		0.098	0.852768		0.00507487	0.0145062	0.00962422		3877674	378872
207017-1	pyruvate			NEGb						100	100		1.685	1.03916		0.00507487	0.0145062	0.00962422		395353	666140
209002	cytidine 5'-monophospho-N-acetylneuraminic acid		Nucleotide Sugar	NEGb	448209	3063-71-6	C00128	HMDB0001176		100	100		1.766	1.03983		0.00507487	0.0145062	0.00962422		661247	1167650
209003	guanosine 5'-diphospho-fucose			NEGa	439211	15839-70-0	C00325	HMDB0001095		100	100		1.361	1.02144		0.0202406	0.0414072	0.0274717		1013920	1379951
209004	UDP-galactose			NEGb	18068	2956-16-3	C00052	HMDB0000302		100	100		4.774	1.1192		0.00507487	0.0145062	0.00962422		397833	1899128
209005	UDP-glucose			NEGb	8629	133-89-1	C00029	HMDB0000286		100	100		5.034	1.1134		0.00507487	0.0145062	0.00962422		1171267	5896523
209007	UDP-glucuronate			NEGa	17473	2616-64-0	C00167	HMDB0000935		100	100		2.307	1.05016		0.00507487	0.0145062	0.00962422		8924982	20591702
209008	UDP-N-acetylglucosamine/galactosamine			NEGb	445675	528-04-1	C00043	HMDB0000290		100	100		1.122	1.00518		0.936186	0.970286	0.64374		36487732	40927263
210002	arabitol/xylitol		Pentose Metabolism	NEGb	439255	7643-75-6	C00532	HMDB0001851		100	100		1.407	1.02398		0.173485	0.252563	0.167564		463150	651438
210003	arabonate/xylonate			NEGb	122045	488-30-2	C00878	HMDB0000539		100	100		2.458	1.06918		0.00507487	0.0145062	0.00962422		278272	684073
210007	ribitol			NEGb			C00474	HMDB0000508		100	100		2.076	1.05705		0.00507487	0.0145062	0.00962422		219679	456090
210008	ribonate			NEGb	5460677	642-98-8	C01685	HMDB0000867		100	100		5.975	1.12545		0.00507487	0.0145062	0.00962422		1298272	7757287
210009	ribose			NEGb	5779	613-83-2	C00121	HMDB0000283		100	100		0.815	0.982165		0.173485	0.252563	0.167564		112796	91918
211001	5-phosphoribosyl diphosphate (PRPP)		Pentose Phosphate Pathway	NEGa			C00119	HMDB0000280		100	100		1.083	1.0037		0.810181	0.877463	0.582156		3669888	3975325
211002	6-phosphogluconate			NEGa	91493	921-62-0	C00345	HMDB0001316		100	100		2.014	1.05008		0.030639	0.0579456	0.0384443		1861467	3749753
211003	ribose 1-phosphate			NEGb	439236	14075-00-4	C00620	HMDB0001489		100	100		2.234	1.06037		0.00507487	0.0145062	0.00962422		602942	1347178
211006	sedoheptulose-7-phosphate			NEGa	92042786	89927-08-2	C05382	HMDB0001068		100	100		4.714	1.10413		0.00507487	0.0145062	0.00962422		3575266	16853139
301001	2-O-methylascorbic acid	Cofactors and Vitamins	Ascorbate and Aldarate Metabolism	NEGb	54726398	17860-87-6		HMDB0240294		100	100		1.467	1.03002		0.0202406	0.0414072	0.0274717		125100	183551
301005	dehydroabietic acid			NEGa						100	100		1.154	1.00777		0.575174	0.688449	0.456754		11367768	13115528
301007	gulonate*			NEGb	152304	20246-53-1	C00800	HMDB0003290		100	100		7.397	1.13335		0.00507487	0.0145062	0.00962422		2658084	19662260
301010	threonate			NEGb	5460407	7306-96-9	C01620	HMDB0000943		100	100		1.75	1.04081		0.0453276	0.0810716	0.0537872		336315	588562
303001	5-methyltetrahydrofolate (5MeTHF)		Folate Metabolism	NEGa			C00440	HMDB0001396		100	100		0.866	0.989962		0.47117	0.580615	0.385211		1115842	966514
304005	heme		Hemoglobin and Porphyrin Metabolism	POSb		14875-96-8	C00032	HMDB0003178		100	100		0.424	0.938785		0.00507487	0.0145062	0.00962422		1307134	554590
306001	1-methylnicotinamide		Nicotinate and Nicotinamide Metabolism	POSa	457	3106-60-3	C02918	HMDB0000699		100	100		2.478	1.05457		0.00507487	0.0145062	0.00962422		8894185	22035883
306003	adenosine 5'-diphosphoribose (ADP-ribose)			POSa			C00301	HMDB0001178		100	100		1.59	1.05993		0.173485	0.252563	0.167564		775746	1233216
306006	nicotinamide			POSa	936	98-92-0	C00153	HMDB0001406		100	100		2.12	1.04758		0.0130652	0.0283987	0.0188412		68034896	144236815
306007	nicotinamide adenine dinucleotide (NAD+)			NEGa			C00003	HMDB0000902		100	100		1.24	1.01126		0.229766	0.314735	0.208812		45697744	56666847
306008	NADH			NEGa			C00004	HMDB0001487		100	100		0.989	1.03416		0.378478	0.48254	0.320143		3352908	3316680
306010	nicotinamide ribonucleotide (NMN)			POSa	14181	75414-16-3	C00455	HMDB0000229		100	100		0.07	0.84131		0.00507487	0.0145062	0.00962422		12781990	893598
306012	nicotinate			POSa	938	59-67-6	C00253	HMDB0001488		100	0		NA	NA		0.00962172	0.0223081	0.0148004		23539838	NA
306013	nicotinate adenine dinucleotide (NAAD+)			NEGa			C00857	HMDB0001179		100	100		0.157	0.895146		0.00507487	0.0145062	0.00962422		55093078	8639088
306014	nicotinate ribonucleoside			POSa	161234	4013-06-3	C05841	HMDB0006809		100	100		0.034	0.808282		0.00507487	0.0145062	0.00962422		45775626	1577811
306015	nicotinic acid mononucleotide (NaMN)			POSa			C01185	HMDB0001132		100	100		0.002	0.644843		0.00507487	0.0145062	0.00962422		60945738	112443
307004-2	CoA		Pantothenate and CoA Metabolism	NEGa			C00010	HMDB0001423		100	100		1.2	1.00916		0.47117	0.580615	0.385211		2984192	3580342
307007	pantoate			NEGb		1112-33-0	C00522	HMDB0240389		50	100		1.506	1.03225		0.0504606	0.0899953	0.0597077		51342	77303
307008	pantothenate			POSa	6613	79-83-4	C00864	HMDB0000210		100	100		3.457	1.0683		0.00507487	0.0145062	0.00962422		51985646	179696185
307009	phosphopantetheine			NEGa			C01134	HMDB0001416		100	100		0.375	0.915927		0.00507487	0.0145062	0.00962422		249582	93595
308003	pterin		Pterin Metabolism	NEGa	73000	2236-60-4	C00715	HMDB0000802		100	100		3.205	1.09984		0.00507487	0.0145062	0.00962422		147558	472971
309001	flavin adenine dinucleotide (FAD)		Riboflavin Metabolism	NEGa	643975	146-14-5	C00016	HMDB0001248		100	100		1.072	1.00381		0.810181	0.877463	0.582156		551653	591358
309002	FMN			NEGa	643976	146-17-8	C00061	HMDB0001520		100	83		0.132	0.846699		0.00499812	0.0145062	0.00962422		557586	73856
310002	dihydrobiopterin		Tetrahydrobiopterin Metabolism	POSa	119055	6779-87-9	C02953	HMDB0000038		100	100		5.449	1.14102		0.00507487	0.0145062	0.00962422		156862	854676
311003	thiamin (Vitamin B1)		Thiamine Metabolism	POSa			C00378	HMDB0000235		100	100		1.929	1.0425		0.00507487	0.0145062	0.00962422		2545891	4910419
311004	thiamin diphosphate			NEGa			C00068	HMDB0001372		100	100		0.841	0.987522		0.229766	0.314735	0.208812		737736	620223
312007	alpha-tocopherol		Tocopherol Metabolism	POSb	14985	59-02-9	C02477	HMDB0001893		100	67		0.844	0.994078		0.170466	0.252563	0.167564		1068030	901708
315002	pyridoxal phosphate		Vitamin B6 Metabolism	POSa			C00018	HMDB0001491		100	100		0.823	0.975435		0.688921	0.778455	0.516469		390056	320933
315003	pyridoxamine			POSa	1052	85-87-0	C00534	HMDB0001431		100	100		2.387	1.06577		0.00507487	0.0145062	0.00962422		454272	1084188
315004	pyridoxamine phosphate			POSa	1053	529-96-4	C00647	HMDB0001555		100	100		1.331	1.02043		0.0453276	0.0810716	0.0537872		551300	733570
315006	pyridoxine (Vitamin B6)			NEGa			C00314	HMDB0000239		100	100		4.047	1.11395		0.00507487	0.0145062	0.00962422		251201	1016669
401002	phosphate	Energy	Oxidative Phosphorylation	NEGa	1004	14265-44-2	C00009	HMDB0001429		100	100		1.18	1.00752		0.378478	0.48254	0.320143		289595961	341639160
402002	2-methylcitrate/homocitrate		TCA Cycle	NEGa	515	6061-96-7		HMDB0000379		100	100		1.672	1.03874		0.0130652	0.0283987	0.0188412		320774	536337
402003	aconitate [cis or trans]			NEGa				HMDB0247961		100	100		1.392	1.01963		0.0453276	0.0810716	0.0537872		11875722	16531854
402004	alpha-ketoglutarate			NEGb	51	328-50-7	C00026	HMDB0000208		100	100		1.145	1.01412		0.688921	0.778455	0.516469		1668755	1911292
402007	citrate			NEGa	311	77-92-9	C00158	HMDB0000094		100	100		1.582	1.02414		0.0130652	0.0283987	0.0188412		74402096	117740149
402008	fumarate			NEGb	444972	110-17-8	C00122	HMDB0000134		100	100		2.778	1.06595		0.00507487	0.0145062	0.00962422		2269250	6304625
402010	isocitrate			POSa	1198	320-77-4	C00311	HMDB0000193		50	100		1.839	1.06414		0.018101	0.0389388	0.0258341		55357	101801
402012	malate			NEGa	222656	97-67-6	C00149	HMDB0000156		100	100		2.471	1.04571		0.00507487	0.0145062	0.00962422		251943850	622448402
402014	succinate			NEGb	1738118	110-15-6	C00042	HMDB0000254		100	100		6.524	1.10784		0.0130652	0.0283987	0.0188412		6926023	45185302
602001	carnitine	Lipid	Carnitine Metabolism	POSa	10917	541-15-1	C00318	HMDB0000062		100	100		2.088	1.03873		0.00507487	0.0145062	0.00962422		126706866	264604543
602002	deoxycarnitine			POSa	725	407-64-7	C01181	HMDB0001161		100	100		1.431	1.0195		0.0655522	0.10856	0.0720245		27471512	39316554
603001	palmitoyl-sphingosine-phosphoethanolamine (d18:1/16:0)		Ceramide PEs	POSb						100	100		1.044	0.995779		1	1	0.663454		125799	131300
604001	ceramide (d16:1/24:1, d18:1/22:1)*		Ceramides	POSb						100	100		1.036	1.00039		0.936186	0.970286	0.64374		1948219	2018237
604002	ceramide (d18:1/14:0, d16:1/16:0)*			POSb	11799850	123065-37-2		HMDB0240681		100	100		1.014	1.00012		1	1	0.663454		3351912	3400468
604003	ceramide (d18:1/17:0, d17:1/18:0)*			POSb	44584335	67492-16-4		HMDB0240678		100	100		0.98	0.996141		0.936186	0.970286	0.64374		847243	830124
604004	ceramide (d18:1/20:0, d16:1/22:0, d20:1/18:0)*			POSb	5283566	7344-02-7	C00195	HMDB0004951		100	100		1.403	1.02273		0.0926958	0.148789	0.0987144		784535	1100700
604005	ceramide (d18:2/24:1, d18:1/24:2)*			POSb		2148920-72-1		HMDB0240680		100	100		1.029	0.999947		1	1	0.663454		7954450	8185796
604008	N-behenoyl-sphingadienine (d18:2/22:0)*			POSb						100	100		1.119	1.00621		0.47117	0.580615	0.385211		2057595	2302171
604011	N-palmitoyl-heptadecasphingosine (d17:1/16:0)*			POSb						100	100		1.367	1.02075		0.0202406	0.0414072	0.0274717		1786273	2442364
604013	N-palmitoyl-sphingadienine (d18:2/16:0)*			POSb	52931118	1919028-96-8		HMDB0240686		100	100		1.102	1.00525		0.47117	0.580615	0.385211		5984333	6595577
604014	N-palmitoyl-sphingosine (d18:1/16:0)			POSb	5283564	24696-26-2	C00195	HMDB0004949		100	100		1.216	1.00963		0.297953	0.400255	0.26555		44884394	54565399
604015	N-stearoyl-sphingadienine (d18:2/18:0)*			POSb	132282053			HMDB0240362		100	100		1.06	1.00416		0.688921	0.778455	0.516469		632268	670264
604016	N-stearoyl-sphingosine (d18:1/18:0)*			POSb	5283565	2304-81-6	C00195	HMDB0004950		100	100		1.817	1.0391		0.00507487	0.0145062	0.00962422		2367559	4302282
607013	oleoyl-arachidonoyl-glycerol (18:1/20:4) [1]*		Diacylglycerol	POSb						100	100		3.477	1.09972		0.00823902	0.0204668	0.0135788		197730	687452
607014	oleoyl-arachidonoyl-glycerol (18:1/20:4) [2]*			POSb	9543786			HMDB0007228		100	100		1.754	1.03884		0.00507487	0.0145062	0.00962422		1442676	2530479
607017	oleoyl-linoleoyl-glycerol (18:1/18:2) [2]			POSb	9543722	91125-76-7		HMDB0007219		83	100		1.617	1.03141		0.0542411	0.0961896	0.0638174		585109	946330
607022	palmitoyl-arachidonoyl-glycerol (16:0/20:4) [2]*			POSb	9543736		C00165	HMDB0007112		100	100		2.3	1.06157		0.00507487	0.0145062	0.00962422		526183	1209986
607031	stearoyl-arachidonoyl-glycerol (18:0/20:4) [2]*			POSb	6438587		C00165	HMDB0007170		100	100		0.921	0.9913		0.688921	0.778455	0.516469		650932	599629
607033	stearoyl-docosahexaenoyl-glycerol (18:0/22:6) [2]*			POSb						100	100		1.396	1.02279		0.128205	0.198164	0.131473		637432	889840
608001	N-palmitoyl-sphinganine (d18:0/16:0)		Dihydroceramides	POSb				HMDB0011760		100	100		1.089	1.00467		0.688921	0.778455	0.516469		4380140	4770785
608002	N-stearoyl-sphinganine (d18:0/18:0)*			POSb	5283573	2304-80-5		HMDB0011761		67	67		1.698	1.04605		0.280475	0.383357	0.254339		61378	104189
608003	N-palmitoyl-deoxysphinganine (m18:0/16:0)			POSb						100	100		1.271	1.01609		0.229766	0.314735	0.208812		964009	1225377
609001	behenoyl dihydrosphingomyelin (d18:0/22:0)*		Dihydrosphingomyelins	POSb	44260132	221097-58-1		HMDB0012091		100	100		0.959	0.995416		0.810181	0.877463	0.582156		1136075	1089824
609002	myristoyl dihydrosphingomyelin (d18:0/14:0)*			POSb	44260138	871577-10-5	C00550	HMDB0012085		100	100		1.512	1.02881		0.00507487	0.0145062	0.00962422		1114320	1684519
609003	palmitoyl dihydrosphingomyelin (d18:0/16:0)*			POSb	9939965	60322-02-3		HMDB0010168		100	100		1.614	1.02726		0.00823902	0.0204668	0.0135788		18863475	30437800
609004	sphingomyelin (d18:0/18:0, d19:0/17:0)*			POSb	44260130		C00550	HMDB0012087		100	100		0.557	0.95546		0.030639	0.0579456	0.0384443		381701	212788
609005	sphingomyelin (d18:0/20:0, d16:0/22:0)*			POSb	44260131			HMDB0012090		100	100		0.337	0.908198		0.00823902	0.0204668	0.0135788		545477	183557
612005	docosahexaenoyl ethanolamide		Endocannabinoid	POSb						100	83		1.52	1.0292		0.0542411	0.0961896	0.0638174		3649684	5548724
612019	N-oleoyltaurine			NEGa						100	100		2.802	1.07818		0.00507487	0.0145062	0.00962422		514796	1442528
612021	N-palmitoylserine			NEGa						17	83		1.659	1.04398		0.00962172	0.0223081	0.0148004		45406	75315
612022	N-palmitoyltaurine			NEGa						83	100		3.777	1.11742		0.00499812	0.0145062	0.00962422		71471	269974
612024	N-stearoyltaurine			NEGa						100	100		1.5	1.02838		0.030639	0.0579456	0.0384443		695679	1043667
612025	oleoyl ethanolamide			NEGa	5283454	111-58-0		HMDB0002088		100	100		1.367	1.02071		0.128205	0.198164	0.131473		2349336	3210705
612027	palmitoyl ethanolamide			NEGa	4671	544-31-0	C16512	HMDB0002100		100	100		1.929	1.04351		0.00823902	0.0204668	0.0135788		1902241	3669529
612028	stearoyl ethanolamide			POSb	27902	111-57-9		HMDB0013078		100	100		1.527	1.02806		0.00823902	0.0204668	0.0135788		1442498	2202795
616001	acetyl-CoA		Fatty Acid Metabolism	NEGa			C00024	HMDB0001206		83	0		NA	NA		0.0284407	0.0572471	0.0379808		120407	NA
616003	oleoyl CoA			NEGb			C00510	HMDB0001322		100	100		1.57	1.03156		0.0655522	0.10856	0.0720245		492576	773440
616004	palmitoyl CoA			NEGb			C00154	HMDB0001338		83	100		2.335	1.07542		0.00499812	0.0145062	0.00962422		66706	155765
616006	3-hydroxydecanoylcarnitine		Fatty Acid Metabolism (Acyl Carnitine, Hydroxy)	POSb	121454166			HMDB0061636		17	100		2.565	1.07483		0.0167114	0.0360737	0.0239332		36641	93975
616061	3-hydroxybutyrylcarnitine (1)			POSa						100	100		1.229	1.01332		0.229766	0.314735	0.208812		1679774	2064669
616062	3-hydroxybutyrylcarnitine (2)			POSa		1469900-92-2		HMDB0013127		100	100		0.402	0.942588		0.00507487	0.0145062	0.00962422		11509686	4627576
616066	3-hydroxyoleoylcarnitine			POSb						100	100		0.474	0.942264		0.0130652	0.0283987	0.0188412		838922	397602
616067	3-hydroxypalmitoylcarnitine			POSb	126456228	195207-76-2		HMDB0013336		100	100		0.909	0.990641		0.378478	0.48254	0.320143		880545	800349
616010	pentadecanoylcarnitine (C15)*		Fatty Acid Metabolism (Acyl Carnitine, Long Chain Saturated)	POSb	123132011			HMDB0062517		100	100		2.449	1.06246		0.00507487	0.0145062	0.00962422		909724	2227576
616072	arachidoylcarnitine (C20)*			POSb	53477833			HMDB0006460		100	100		0.405	0.929108		0.00823902	0.0204668	0.0135788		414557	167813
616088	margaroylcarnitine (C17)*			POSb	53477803	106182-29-0		HMDB0006210		100	100		1.217	1.01104		0.575174	0.688449	0.456754		1250458	1521205
616090	myristoylcarnitine (C14)			POSb				HMDB0254979		100	100		3.782	1.0837		0.00507487	0.0145062	0.00962422		6162636	23305641
616098	palmitoylcarnitine (C16)			POSb	11953816	2364-67-2	C02990	HMDB0000222		100	100		2.552	1.05241		0.00507487	0.0145062	0.00962422		28057730	71611438
616100	stearoylcarnitine (C18)			POSb	52922056	25597-09-5		HMDB0000848		100	100		0.701	0.976207		0.0655522	0.10856	0.0720245		9432346	6609238
616076	decanoylcarnitine (C10)		Fatty Acid Metabolism (Acyl Carnitine, Medium Chain)	POSb	11953821	1492-27-9	C03299	HMDB0000651		83	100		0.934	0.999844		0.936075	0.970286	0.64374		130525	121972
616083	hexanoylcarnitine (C6)			POSa	3246938	22671-29-0		HMDB0000756		100	100		2.299	1.06146		0.00507487	0.0145062	0.00962422		487204	1120184
616084	laurylcarnitine (C12)			POSb	168381	25518-54-1		HMDB0002250		100	100		2.752	1.08103		0.00507487	0.0145062	0.00962422		344992	949317
616095	octanoylcarnitine (C8)			POSb	11953814	25243-95-2	C02838	HMDB0000791		83	100		2.948	1.09336		0.00499812	0.0145062	0.00962422		111126	327588
616068	5-dodecenoylcarnitine (C12:1)		Fatty Acid Metabolism (Acyl Carnitine, Monounsaturated)	POSb				HMDB0013326		17	33		1.076	1.00404		1	1	0.663454		251320	270430
616081	eicosenoylcarnitine (C20:1)*			POSb						100	100		0.343	0.929578		0.00507487	0.0145062	0.00962422		4260949	1461126
616089	myristoleoylcarnitine (C14:1)*			POSb	90659872	889848-55-9		HMDB0240588		100	100		1.794	1.05131		0.030639	0.0579456	0.0384443		681853	1223252
616096	oleoylcarnitine (C18:1)			POSb	46907933	38677-66-6		HMDB0005065		100	100		1.026	1.0003		0.810181	0.877463	0.582156		33541219	34410262
616097	palmitoleoylcarnitine (C16:1)*			POSb		329321-94-0		HMDB0013207		100	100		1.565	1.02685		0.0655522	0.10856	0.0720245		9858846	15424482
616017	docosapentaenoylcarnitine (C22:5n3)*		Fatty Acid Metabolism (Acyl Carnitine, Polyunsaturated)	POSb						100	100		0.39	0.935274		0.0453276	0.0810716	0.0537872		631603	246035
616071	arachidonoylcarnitine (C20:4)			POSb	136212424	36816-11-2		HMDB0006455		100	100		0.353	0.933138		0.0655522	0.10856	0.0720245		632113	223170
616077	dihomo-linolenoylcarnitine (C20:3n3 or 6)*			POSb						100	100		0.462	0.946106		0.0655522	0.10856	0.0720245		886611	409176
616078	dihomo-linoleoylcarnitine (C20:2)*			POSb						100	100		0.513	0.952969		0.0202406	0.0414072	0.0274717		1001353	513656
616080	docosahexaenoylcarnitine (C22:6)*			POSb						100	100		0.348	0.935517		0.173485	0.252563	0.167564		745608	259834
616086	linolenoylcarnitine (C18:3)*			POSb						83	100		1.025	1.00879		0.936075	0.970286	0.64374		191279	196131
616087	linoleoylcarnitine (C18:2)*			POSb	6450015	36816-10-1		HMDB0006469		100	100		0.94	0.998475		0.810181	0.877463	0.582156		2589822	2433815
616069	acetylcarnitine (C2)		Fatty Acid Metabolism (Acyl Carnitine, Short Chain)	POSa		3040-38-8		HMDB0000201		100	100		0.906	0.993298		0.936186	0.970286	0.64374		229914078	208198744
616027	oleoylcholine		Fatty Acid Metabolism (Acyl Choline)	POSb	59040790	127165-03-1		HMDB0240596		100	0		NA	NA		0.00962172	0.0223081	0.0148004		166425	NA
616029	palmitoylcholine			POSb	151731	13100-90-8		HMDB0240592		100	0		NA	NA		0.00962172	0.0223081	0.0148004		111546	NA
616105	N-palmitoylglycine		Fatty Acid Metabolism (Acyl Glycine)	NEGa	151008	158305-64-7		HMDB0013034		100	100		1.344	1.02239		0.173485	0.252563	0.167564		228466	306946
616056	butyrylcarnitine (C4)		Fatty Acid Metabolism (also BCAA Metabolism)	POSa	213144	25576-40-3	C02862	HMDB0002013		100	100		6.022	1.10552		0.00507487	0.0145062	0.00962422		19252764	115932585
616059	propionylcarnitine (C3)			POSa	188824	20064-19-1	C03017	HMDB0000824		100	100		1.668	1.02662		0.00823902	0.0204668	0.0135788		52606876	87763810
620002	(14 or 15)-methylpalmitate (a17:0 or i17:0)		Fatty Acid, Branched	NEGa	8181	112-39-0	C16995	HMDB0061859		100	100		1.07	1.00245		1	1	0.663454		7355076	7868299
620003	(16 or 17)-methylstearate (a19:0 or i19:0)			NEGa	3083779	2724-59-6		HMDB0037397		100	100		0.855	0.98543		0.378478	0.48254	0.320143		836773	715369
621002-1	2-hydroxyglutarate		Fatty Acid, Dicarboxylate	POSa	43	2889-31-8	C02630	HMDB0059655		100	100		3.384	1.08679		0.00507487	0.0145062	0.00962422		926738	3135727
621013	azelate (C9-DC)			NEGa	2266	123-99-9	C08261	HMDB0000784		100	100		0.83	0.986846		0.173485	0.252563	0.167564		468419	388612
621020	dodecadienoate (12:2)*			NEGa						100	100		0.861	0.995036		0.936186	0.970286	0.64374		369852	318260
621025	glutarate (C5-DC)			NEGb	743	110-94-1	C00489	HMDB0000661		100	100		2.647	1.07542		0.00507487	0.0145062	0.00962422		306128	810262
621042	tetradecanedioate (C14-DC)			NEGa	13185	821-38-5		HMDB0000872		100	100		1.823	1.05248		0.0202406	0.0414072	0.0274717		42760	77932
621046	undecanedioate (C11-DC)			NEGa	15816	1852-04-6		HMDB0000888		100	100		0.798	0.98295		0.229766	0.314735	0.208812		219595	175228
624007	2-hydroxydecanoate		Fatty Acid, Monohydroxy	NEGa	5312797	70267-29-7		HMDB0094656		100	100		1.599	1.03912		0.00507487	0.0145062	0.00962422		140872	225228
624019	3-hydroxyhexanoate			NEGa	11829482	66997-60-2		HMDB0061652		100	100		0.813	0.978633		0.297953	0.400255	0.26555		177624	144354
624020	3-hydroxylaurate			NEGa	5312805	45162-48-9		HMDB0000387		100	100		0.854	0.986231		0.229766	0.314735	0.208812		456710	390216
627003	1-palmitoyl-2-palmitoleoyl-galactosylglycerol (16:0/16:1)*		Galactosyl Glycerolipids	POSb						100	100		2.002	1.04802		0.0130652	0.0283987	0.0188412		968301	1938843
627004	galactosylglycerol			NEGb	656504		C05401	HMDB0006790		100	100		1.5	1.03181		0.0202406	0.0414072	0.0274717		130531	195822
628001	glycerol		Glycerolipid Metabolism	NEGa	753	56-81-5	C00116	HMDB0000131		100	100		4.127	1.11966		0.00823902	0.0204668	0.0135788		1287100	5312013
628002	glycerol 3-phosphate			POSa	439162	57-03-4	C00093	HMDB0000126		100	100		0.54	0.961292		0.00507487	0.0145062	0.00962422		3644810	1968392
628003	glycerophosphoglycerol			NEGb	54575349	185615-51-4		HMDB0240316		100	100		9.657	1.18402		0.00507487	0.0145062	0.00962422		262868	2538572
634001	glycosyl ceramide (d16:1/24:1, d18:1/22:1)*		Hexosylceramides (HCER)	POSb						100	100		0.903	0.990149		0.688921	0.778455	0.516469		1150490	1038860
634002	glycosyl ceramide (d18:1/20:0, d16:1/22:0)*			POSb						100	100		0.744	0.975607		0.229766	0.314735	0.208812		1002631	746275
634003	glycosyl ceramide (d18:1/23:1, d17:1/24:1)*			POSb						100	100		0.885	0.987166		0.810181	0.877463	0.582156		1610141	1425658
634004	glycosyl ceramide (d18:2/24:1, d18:1/24:2)*			POSb						100	100		0.799	0.982638		0.173485	0.252563	0.167564		3817105	3048489
634007	glycosyl-N-behenoyl-sphingadienine (d18:2/22:0)*			POSb						100	100		0.782	0.980301		0.229766	0.314735	0.208812		1181799	924295
634009	glycosyl-N-nervonoyl-sphingosine (d18:1/24:1)*			POSb	20057357		C01190	HMDB0004975		100	100		1.038	0.999843		1	1	0.663454		11840013	12284224
634010	glycosyl-N-palmitoyl-sphingosine (d18:1/16:0)			POSb						100	100		0.947	0.99565		1	1	0.663454		76907090	72820375
634012	glycosyl-N-stearoyl-sphingosine (d18:1/18:0)			POSb						100	100		0.564	0.958638		0.00507487	0.0145062	0.00962422		2064885	1165368
635002	inositol 1-phosphate (I1P)		Inositol Metabolism	NEGb		15421-51-9	C01177	HMDB0000213		100	100		2.605	1.08261		0.00507487	0.0145062	0.00962422		103180	268809
635006	myo-inositol			NEGb		87-89-8	C00137	HMDB0000211		100	100		1.332	1.01298		0.936186	0.970286	0.64374		85101992	113328992
637002	lactosyl-N-nervonoyl-sphingosine (d18:1/24:1)*		Lactosylceramides (LCER)	POSb	90659830	483370-78-1		HMDB0004872		100	100		1.113	1.00583		0.936186	0.970286	0.64374		1401804	1560561
637003	lactosyl-N-palmitoyl-sphingosine (d18:1/16:0)			POSb	53477895	4201-62-1	C01290	HMDB0006750		100	100		1.02	1.00004		1	1	0.663454		3005118	3066073
638001	10-heptadecenoate (17:1n7)		Long Chain Monounsaturated Fatty Acid	NEGa	5312435	29743-97-3		HMDB0060038		100	100		1.055	1.00205		0.936186	0.970286	0.64374		8785729	9272211
638002	10-nonadecenoate (19:1n9)			NEGa	5312513	73033-09-7		HMDB0013622		100	100		0.764	0.982592		0.128205	0.198164	0.131473		10614407	8106457
638007	myristoleate (14:1n5)			NEGa	5281119	544-64-9	C08322	HMDB0002000		100	100		1.191	1.00941		0.688921	0.778455	0.516469		3622861	4315530
638010	oleate/vaccenate (18:1)			NEGa	445639	112-80-1	C00712	HMDB0000207		100	100		0.938	0.995908		0.688921	0.778455	0.516469		381652431	357927912
638012	palmitoleate (16:1n7)			NEGa	445638	373-49-9	C08362	HMDB0003229		100	100		1.224	1.00899		0.936186	0.970286	0.64374		40081368	49048483
639001	eicosenoate (20:1)			NEGa	5282768	5561-99-9	C16526	HMDB0002231		100	100		0.767	0.984405		0.128205	0.198164	0.131473		51775520	39715202
639002	erucate (22:1n9)			NEGa	5281116	112-86-7	C08316	HMDB0002068		100	100		0.772	0.977716		0.229766	0.314735	0.208812		26064796	20118371
640-5801	dihomo-linolenate (20:3n3 or n6)		Long Chain Polyunsaturated Fatty Acid (n3 and n6)	NEGa	5280581	1783-84-2	C03242	HMDB0002925		100	100		1.383	1.01813		0.297953	0.400255	0.26555		3781938	5229653
640002	docosatrienoate (22:3n6)*			NEGa						100	100		0.904	0.994977		0.575174	0.688449	0.456754		5790507	5234880
658002	arachidonate (20:4n6)			NEGa	444899	506-32-1	C00219	HMDB0001043		100	100		1.873	1.03704		0.0453276	0.0810716	0.0537872		9708761	18186226
658003	dihomo-linoleate (20:2n6)			NEGa	6439848	5598-38-9	C16525	HMDB0005060		100	100		1.027	1.00112		1	1	0.663454		17045586	17502273
658005	docosadienoate (22:2n6)			NEGa	5312554	17735-98-7	C16533	HMDB0061714		100	100		0.84	0.988272		0.47117	0.580615	0.385211		4186982	3516675
658006	docosahexaenoate (DHA; 22:6n3)			NEGa	445580	6217-54-5	C06429	HMDB0002183		100	100		1.281	1.01315		0.229766	0.314735	0.208812		14025779	17961582
658007	docosapentaenoate (n3 DPA; 22:5n3)			NEGa	5497182	24880-45-3	C16513	HMDB0006528		100	100		1.048	1.00191		1	1	0.663454		10972281	11504017
658008	docosapentaenoate (n6 DPA; 22:5n6)			NEGa	6441454	25448-00-4		HMDB0001976		100	100		1.064	0.99972		0.575174	0.688449	0.456754		2073373	2206812
658010	eicosapentaenoate (EPA; 20:5n3)			NEGa	446284	10417-94-4	C06428	HMDB0001999		100	100		1.223	1.01038		0.378478	0.48254	0.320143		16678807	20395746
658012	hexadecadienoate (16:2n6)			NEGa	13932172	28290-73-5		HMDB0000477		100	100		1.168	1.00876		0.688921	0.778455	0.516469		2839812	3317763
658014	linoleate (18:2n6)			NEGa	5280450	60-33-3	C01595	HMDB0000673		100	100		1.185	1.0084		0.47117	0.580615	0.385211		21078346	24984736
658015	linolenate [alpha or gamma; (18:3n3 or 6)]			NEGa	5280933	506-26-3	C06426	HMDB0003073		100	100		1.465	1.02249		0.229766	0.314735	0.208812		1568572	2298685
658016	mead acid (20:3n9)			NEGa	5312531	20590-32-3		HMDB0010378		100	100		1.586	1.02836		0.0655522	0.10856	0.0720245		17633820	27967962
658017	nisinate (24:6n3)			NEGa	11792612	81247-23-6		HMDB0002007		100	100		0.785	0.981458		0.378478	0.48254	0.320143		1047981	822534
658018	stearidonate (18:4n3)			NEGa	5312508	20290-75-9	C16300	HMDB0006547		100	100		1.074	1.0031		0.688921	0.778455	0.516469		5263436	5651765
658019	tetradecadienoate (14:2)*			NEGa	5312409	39039-37-7		HMDB0000560		100	100		1.106	1.00836		0.47117	0.580615	0.385211		477552	528240
638003	arachidate (20:0)		Long Chain Saturated Fatty Acid	NEGa	10467	506-30-9	C06425	HMDB0002212		100	100		0.855	0.988665		0.47117	0.580615	0.385211		20762167	17746000
638005	margarate (17:0)			NEGa	10465	506-12-7		HMDB0002259		100	100		0.879	0.990941		0.47117	0.580615	0.385211		17509128	15388049
638006	myristate (14:0)			NEGa	11005	544-63-8	C06424	HMDB0000806		100	100		1.21	1.00826		0.810181	0.877463	0.582156		101872566	123303186
638009	nonadecanoate (19:0)			NEGa	12591	646-30-0	C16535	HMDB0000772		100	100		0.787	0.981565		0.0655522	0.10856	0.0720245		2233379	1756978
638013	pentadecanoate (15:0)			NEGa	13849	1002-84-2	C16537	HMDB0000826		100	100		1.117	1.00463		1	1	0.663454		30996998	34619484
642002	1-arachidonoyl-GPC (20:4n6)*		Lysophospholipid	NEGa						100	100		0.442	0.93117		0.0130652	0.0283987	0.0188412		300745	133062
642003	1-arachidonoyl-GPE (20:4n6)*			NEGa	42607465	652149-09-2		HMDB0011517		100	100		0.956	0.994937		0.688921	0.778455	0.516469		6179924	5906766
642004	1-arachidonoyl-GPI (20:4)*			NEGa		1246430-04-5		HMDB0061690		100	100		0.64	0.938911		0.229766	0.314735	0.208812		399596	255829
642005	1-cerotoyl-GPC (26:0)*			POSb				HMDB0029205		50	100		2.452	1.07347		0.00433691	0.0145062	0.00962422		57941	142084
642007	1-lignoceroyl-GPC (24:0)			POSb	24779481		C04230	HMDB0010405		67	100		2.346	1.06414		0.0438264	0.0810716	0.0537872		62158	145832
642011	1-linoleoyl-GPC (18:2)			POSb	11005824	22252-07-9		HMDB0010386		100	100		1.394	1.02192		0.173485	0.252563	0.167564		211828	295306
642012	1-linoleoyl-GPE (18:2)*			NEGa	52925130	85046-18-0		HMDB0011507		100	100		1.259	1.01808		0.378478	0.48254	0.320143		188990	237878
642013	1-linoleoyl-GPG (18:2)*			NEGa	52927437	2093174-30-0		HMDB0240600		83	100		1.221	1.02314		0.377642	0.48254	0.320143		121416	148302
642018	1-oleoyl-GPC (18:1)			NEGa	16081932	19420-56-5		HMDB0002815		100	100		1.223	1.01137		0.575174	0.688449	0.456754		2659852	3252525
642019	1-oleoyl-GPE (18:1)			NEGa	9547071	89576-29-4		HMDB0011506		100	100		1.387	1.01843		0.229766	0.314735	0.208812		5030502	6976040
642020	1-oleoyl-GPG (18:1)*			NEGa				HMDB0240602		100	100		1.292	1.01442		0.297953	0.400255	0.26555		2580392	3334638
642021	1-oleoyl-GPI (18:1)*			NEGa		1114770-15-8		HMDB0061693		100	100		1.733	1.03994		0.0655522	0.10856	0.0720245		875325	1517060
642022	1-oleoyl-GPS (18:1)			NEGa	85036846			HMDB0061694		50	83		2.308	1.05176		0.213025	0.308688	0.2048		86852	200473
642024	1-palmitoleoyl-GPC (16:1)*			NEGa	24779461	76790-27-7	C04230	HMDB0010383		100	100		0.974	0.997157		0.810181	0.877463	0.582156		1036902	1009645
642026	1-palmitoyl-GPC (16:0)			POSb	460602	17364-16-8	C04230	HMDB0010382		100	100		1.646	1.03158		0.00507487	0.0145062	0.00962422		3212007	5285892
642027	1-palmitoyl-GPE (16:0)			POSb	9547069	53862-35-4		HMDB0011503		100	100		2.246	1.05909		0.00507487	0.0145062	0.00962422		493251	1107934
642028	1-palmitoyl-GPG (16:0)*			NEGa	42607483	116870-26-9		HMDB0240601		100	100		1.344	1.01991		0.47117	0.580615	0.385211		505575	679639
642029	1-palmitoyl-GPI (16:0)			NEGa		1425501-12-7		HMDB0061695		100	100		3.706	1.12119		0.00507487	0.0145062	0.00962422		145710	539965
642031	1-palmitoyl-GPS (16:0)*			NEGa						0	100		NA	NA		0.00962172	0.0223081	0.0148004		NA	177400
642033	1-stearoyl-GPC (18:0)			POSb	497299	19420-57-6	C04230	HMDB0010384		100	100		1.764	1.037		0.00507487	0.0145062	0.00962422		3034903	5354079
642034	1-stearoyl-GPE (18:0)			POSb	9547068	69747-55-3		HMDB0011130		100	100		1.676	1.03324		0.00507487	0.0145062	0.00962422		2312371	3875429
642035	1-stearoyl-GPG (18:0)			NEGa						100	100		1.755	1.05177		0.173485	0.252563	0.167564		161663	283767
642036	1-stearoyl-GPI (18:0)			NEGa		327620-46-2		HMDB0240261		100	100		1.161	1.00936		0.936186	0.970286	0.64374		2396100	2781262
642037	1-stearoyl-GPS (18:0)*			NEGa	74819135			HMDB0061698		100	100		1.564	1.03002		0.229766	0.314735	0.208812		1736631	2715324
642038	2-palmitoleoyl-GPC (16:1)*			POSb			C04230	HMDB0010383		100	100		1.336	1.01774		0.229766	0.314735	0.208812		1187754	1587159
642040	2-palmitoyl-GPC (16:0)*			NEGa				HMDB0240262		100	100		1.225	1.01164		0.688921	0.778455	0.516469		1952234	2391269
642042	2-stearoyl-GPE (18:0)*			NEGa	53480667	899443-67-5		HMDB0011129		100	100		2.557	1.06784		0.00507487	0.0145062	0.00962422		510506	1305328
643001	1-(1-enyl-oleoyl)-2-oleoyl-GPE (P-18:1/18:1)*		Lysoplasmalogen	POSb	53480897			HMDB0011441		100	100		1.178	1.0085		1	1	0.663454		13136416	15473151
643002	1-(1-enyl-oleoyl)-GPE (P-18:1)*			POSb						100	100		1.869	1.04654		0.0202406	0.0414072	0.0274717		443126	828297
643003	1-(1-enyl-palmitoyl)-GPC (P-16:0)*			POSb	10917802			HMDB0010407		100	100		1.186	1.0097		0.688921	0.778455	0.516469		758200	899281
643004	1-(1-enyl-palmitoyl)-GPE (P-16:0)*			POSb	42607469	174062-72-7		HMDB0011152		100	100		1.585	1.02983		0.030639	0.0579456	0.0384443		2085797	3306128
643005	1-(1-enyl-stearoyl)-GPE (P-18:0)*			POSb	42607470	174062-73-8		HMDB0240598		100	100		1.256	1.01359		0.378478	0.48254	0.320143		2679469	3366152
644008	heptanoate (7:0)		Medium Chain Fatty Acid	NEGa	8094	111-14-8	C17714	HMDB0000666		100	100		0.927	0.996203		0.810181	0.877463	0.582156		1120173	1038331
644009	laurate (12:0)			NEGa	3893	143-07-7	C02679	HMDB0000638		100	100		1.299	1.01311		0.297953	0.400255	0.26555		38131266	49519623
645001	3-hydroxy-3-methylglutarate		Mevalonate Metabolism	NEGb	1662	503-49-1	C03761	HMDB0000355		100	100		3.11	1.06194		0.128205	0.198164	0.131473		2597864	8080268
646004	1-docosahexaenoylglycerol (22:6)		Monoacylglycerol	NEGa	53480995	1044598-64-2		HMDB0011587		100	100		0.976	1.00043		0.810181	0.877463	0.582156		237594	231799
646012	1-oleoylglycerol (18:1)			NEGa	12178130	129784-87-8		HMDB0011567		100	100		1.461	1.01398		0.810181	0.877463	0.582156		19450238	28426098
646014	1-palmitoylglycerol (16:0)			NEGa	3084463	32899-41-5		HMDB0011564		100	100		1.151	1.00895		0.378478	0.48254	0.320143		21911286	25212174
646021	2-oleoylglycerol (18:1)			NEGa	5319879			HMDB0011537		100	100		1.367	1.01914		0.128205	0.198164	0.131473		8351822	11417382
650001	1,2-dilinoleoyl-GPC (18:2/18:2)		Phosphatidylcholine (PC)	POSb	5288075	998-06-1		HMDB0008138		100	100		1.19	1.00957		0.378478	0.48254	0.320143		2607612	3103489
650002	1,2-dioleoyl-GPC (18:1/18:1)			POSb				HMDB0062690		100	100		1.104	1.00404		0.810181	0.877463	0.582156		396253705	437538801
650003	1,2-dipalmitoleoyl-GPC (16:1/16:1)*			POSb	24778764		C00157	HMDB0008002		100	100		1.326	1.01472		0.0453276	0.0810716	0.0537872		41763382	55395536
650004	1,2-dipalmitoyl-GPC (16:0/16:0)			POSb	452110	63-89-8	C00157	HMDB0000564		100	100		1.354	1.01521		0.0202406	0.0414072	0.0274717		109457242	148236890
650005	1,2-distearoyl-GPC (18:0/18:0)			POSb				HMDB0008036		100	83		0.861	0.998168		0.52111	0.639637	0.42437		704623	606503
650006	1-linoleoyl-2-arachidonoyl-GPC (18:2/20:4n6)*			POSb	24778979	85082-02-6		HMDB0008147		100	100		1.233	1.01212		0.128205	0.198164	0.131473		6252894	7707264
650007	1-linoleoyl-2-linolenoyl-GPC (18:2/18:3)*			POSb	52922731	85046-19-1		HMDB0008141		100	100		1.269	1.01449		0.173485	0.252563	0.167564		2841693	3606134
650008	1-myristoyl-2-arachidonoyl-GPC (14:0/20:4)*			POSb	24778634			HMDB0007883		100	100		1.088	1.00405		0.688921	0.778455	0.516469		2768356	3013344
650009	1-myristoyl-2-palmitoyl-GPC (14:0/16:0)			POSb	129657			HMDB0007869		100	100		1.642	1.02567		0.00507487	0.0145062	0.00962422		91485605	150196834
650010	1-oleoyl-2-docosahexaenoyl-GPC (18:1/22:6)*			POSb	24778955			HMDB0008123		100	100		1.164	1.00785		0.575174	0.688449	0.456754		8805628	10248934
650011	1-oleoyl-2-linoleoyl-GPC (18:1/18:2)*			POSb	24778939	17041-44-0		HMDB0008105		100	100		1.082	1.00305		0.688921	0.778455	0.516469		43619922	47203462
650012	1-palmitoleoyl-2-linolenoyl-GPC (16:1/18:3)*			POSb	52922452			HMDB0008008		100	100		1.27	1.01299		0.688921	0.778455	0.516469		507962	645136
650013	1-palmitoleoyl-2-linoleoyl-GPC (16:1/18:2)*			POSb	24778768	182820-31-1		HMDB0008006		100	100		1.182	1.00862		0.575174	0.688449	0.456754		11735838	13868227
650016	1-palmitoyl-2-arachidonoyl-GPC (16:0/20:4n6)			POSb	10747814	35418-58-7		HMDB0007982		100	100		1.267	1.0127		0.0926958	0.148789	0.0987144		27007356	34207662
650017	1-palmitoyl-2-dihomo-linolenoyl-GPC (16:0/20:3n3 or 6)*			POSb						100	100		1.14	1.00615		0.378478	0.48254	0.320143		36440450	41553130
650018	1-palmitoyl-2-docosahexaenoyl-GPC (16:0/22:6)			POSb	6441886			HMDB0007991		100	100		1.207	1.01028		0.378478	0.48254	0.320143		11182405	13494824
650019	1-palmitoyl-2-gamma-linolenoyl-GPC (16:0/18:3n6)*			POSb	24778699	203393-39-9		HMDB0007974		100	100		1.144	1.0072		0.688921	0.778455	0.516469		12977890	14841298
650020	1-palmitoyl-2-linoleoyl-GPC (16:0/18:2)			POSb	5287971	17708-90-6		HMDB0007973		100	100		1.199	1.00827		0.378478	0.48254	0.320143		255027557	305869838
650021	1-palmitoyl-2-oleoyl-GPC (16:0/18:1)			POSb	5497103	26853-31-6		HMDB0007972		100	100		1.097	1.00355		0.936186	0.970286	0.64374		928077113	1017898901
650022	1-palmitoyl-2-palmitoleoyl-GPC (16:0/16:1)*			POSb	6443788	53595-24-7		HMDB0007969		100	100		1.458	1.01812		0.0453276	0.0810716	0.0537872		217083500	316479707
650023	1-palmitoyl-2-stearoyl-GPC (16:0/18:0)			POSb	24778686	59403-51-9		HMDB0007970		100	100		0.937	0.99466		1	1	0.663454		45011784	42197186
650024	1-stearoyl-2-arachidonoyl-GPC (18:0/20:4)			POSb	16219824	35418-59-8		HMDB0008048		100	100		0.854	0.989438		0.229766	0.314735	0.208812		20533584	17535583
650025	1-stearoyl-2-docosahexaenoyl-GPC (18:0/22:6)			POSb	24778876			HMDB0008057		100	100		1.032	1.00044		0.936186	0.970286	0.64374		6580773	6789586
650027	1-stearoyl-2-oleoyl-GPC (18:0/18:1)			POSb	24778825	56421-10-4		HMDB0008038		100	100		0.754	0.984123		0.0202406	0.0414072	0.0274717		230471588	173720484
651002	1,2-dioleoyl-GPE (18:1/18:1)		Phosphatidylethanolamine (PE)	POSb	9546757			HMDB0009059		100	100		1.313	1.01354		0.0655522	0.10856	0.0720245		104670813	137484256
651003	1,2-dipalmitoleoyl-GPE (16:1/16:1)*			POSb				HMDB0008957		100	100		1.652	1.03492		0.00507487	0.0145062	0.00962422		1404251	2319395
651004	1,2-dipalmitoyl-GPE (16:0/16:0)*			POSb	445468	923-61-5		HMDB0008923		100	100		1.14	1.00751		0.688921	0.778455	0.516469		1356038	1545412
651007	1-oleoyl-2-docosahexaenoyl-GPE (18:1/22:6)*			POSb	52922113			HMDB0009078		100	100		1.164	1.00773		0.810181	0.877463	0.582156		7412280	8627563
651008	1-oleoyl-2-linoleoyl-GPE (18:1/18:2)*			POSb				HMDB0009060		100	100		1.152	1.00729		0.47117	0.580615	0.385211		9107541	10490118
651009	1-palmitoleoyl-2-oleoyl-GPE (16:1/18:1)*			POSb						100	100		1.318	1.01464		0.128205	0.198164	0.131473		10274076	13544551
651010	1-palmitoyl-2-arachidonoyl-GPE (16:0/20:4)*			POSb				HMDB0008937		100	100		1.735	1.03286		0.229766	0.314735	0.208812		4326242	7506562
651011	1-palmitoyl-2-docosahexaenoyl-GPE (16:0/22:6)*			POSb	9546799			HMDB0008946		100	100		1.653	1.03065		0.00507487	0.0145062	0.00962422		4438106	7338232
651012	1-palmitoyl-2-linoleoyl-GPE (16:0/18:2)			POSb				HMDB0008928		100	100		1.343	1.01653		0.0655522	0.10856	0.0720245		16137952	21668652
651013	1-palmitoyl-2-oleoyl-GPE (16:0/18:1)			POSb				HMDB0008927		100	100		1.604	1.0248		0.00507487	0.0145062	0.00962422		72462057	116237593
651014	1-palmitoyl-2-stearoyl-GPE (16:0/18:0)*			POSb				HMDB0008925		100	100		0.847	0.985755		0.378478	0.48254	0.320143		968856	820888
651015	1-stearoyl-2-arachidonoyl-GPE (18:0/20:4)			POSb	5289133	61216-62-4		HMDB0009003		100	100		1.096	1.004		0.810181	0.877463	0.582156		65809683	72143264
651016	1-stearoyl-2-docosahexaenoyl-GPE (18:0/22:6)*			POSb	9546798			HMDB0009012		100	100		1.231	1.0109		0.173485	0.252563	0.167564		22313792	27462144
651018	1-stearoyl-2-oleoyl-GPE (18:0/18:1)			POSb	9546742	6418-95-7		HMDB0008993		100	100		1.432	1.01839		0.00823902	0.0204668	0.0135788		81996302	117401923
652001	1,2-dioleoyl-GPG (18:1/18:1)		Phosphatidylglycerol (PG)	NEGb						100	100		0.788	0.978059		0.0655522	0.10856	0.0720245		411418	324094
652002	1,2-distearoyl-GPG (18:0/18:0)			NEGb	24779552			HMDB0010602		100	100		0.93	0.99343		0.810181	0.877463	0.582156		785780	730466
652005	1-palmitoyl-2-oleoyl-GPG (16:0/18:1)			NEGb						100	100		0.921	0.992761		0.810181	0.877463	0.582156		4037872	3719650
652006	1-stearoyl-2-oleoyl-GPG (18:0/18:1)			NEGb	52927224			HMDB0010632		100	100		1.037	1.0009		1	1	0.663454		1749100	1813614
656005	1,2-dipalmitoyl-GPG (16:0/16:0)			NEGb				HMDB0010570		100	100		0.448	0.941421		0.00507487	0.0145062	0.00962422		1781087	797372
653001	1,2-dioleoyl-GPI (18:1/18:1)		Phosphatidylinositol (PI)	NEGb			C00626	HMDB0009837		100	100		1.455	1.02504		0.0202406	0.0414072	0.0274717		1392051	2025858
653002	1-oleoyl-2-arachidonoyl-GPI (18:1/20:4)*			NEGb				HMDB0009844		100	100		1.08	1.00388		0.936186	0.970286	0.64374		572318	618327
653005	1-palmitoleoyl-2-oleoyl-GPI (16:1/18:1)*			NEGb						100	100		1.927	1.04986		0.00507487	0.0145062	0.00962422		325815	627902
653006	1-palmitoyl-2-arachidonoyl-GPI (16:0/20:4)*			NEGb		88587-97-7		HMDB0009789		100	100		1.401	1.02713		0.030639	0.0579456	0.0384443		166725	233502
653008	1-palmitoyl-2-oleoyl-GPI (16:0/18:1)*			NEGb				HMDB0009783		100	100		2.385	1.06303		0.00507487	0.0145062	0.00962422		780910	1862679
653009	1-stearoyl-2-arachidonoyl-GPI (18:0/20:4)			NEGb		206059-96-3		HMDB0009815		100	100		0.849	0.987312		0.378478	0.48254	0.320143		2998579	2546766
653010	1-stearoyl-2-linoleoyl-GPI (18:0/18:2)			POSb			C00626	HMDB0009809		100	100		1.689	1.03289		0.00507487	0.0145062	0.00962422		6738917	11384445
653011	1-stearoyl-2-oleoyl-GPI (18:0/18:1)*			NEGb				HMDB0009835		100	100		1.394	1.02192		0.030639	0.0579456	0.0384443		1544792	2152872
654004	1-palmitoyl-2-oleoyl-GPS (16:0/18:1)		Phosphatidylserine (PS)	POSb				HMDB0012357		100	100		1.883	1.03546		0.00507487	0.0145062	0.00962422		29025310	54647494
654005	1-stearoyl-2-arachidonoyl-GPS (18:0/20:4)			POSb	24779545	132014-80-3		HMDB0012383		100	100		1.164	1.00828		0.47117	0.580615	0.385211		7568249	8807850
654007	1-stearoyl-2-oleoyl-GPS (18:0/18:1)			POSb	59720717	124262-93-7	C02737	HMDB0010163		100	100		1.098	1.00434		0.688921	0.778455	0.516469		79119861	86898880
655001	choline		Phospholipid Metabolism	POSa	305	62-49-7	C00114	HMDB0000097		100	100		0.177	0.910342		0.00507487	0.0145062	0.00962422		291613215	51729678
655002	choline phosphate			POSa	1014	3616-04-4	C00588	HMDB0001565		100	100		2.215	1.03671		0.00507487	0.0145062	0.00962422		1374152882	3043805577
655003	CDP-choline			POSa	13805	987-78-0	C00307	HMDB0001413		100	100		1.697	1.03208		0.00507487	0.0145062	0.00962422		7710010	13081567
655004	CDP-ethanolamine			NEGb	123727	3036-18-8	C00570	HMDB0001564		100	100		0.964	0.996154		0.810181	0.877463	0.582156		719717	693602
655005	glycerophosphoethanolamine			NEGb	123874	1190-00-7	C01233	HMDB0000114		100	100		6.99	1.16689		0.00507487	0.0145062	0.00962422		107028	748167
655006	glycerophosphoinositol*			NEGb						100	100		4.845	1.11222		0.00507487	0.0145062	0.00962422		2169733	10512940
655007	glycerophosphorylcholine (GPC)			POSa	657272	28319-77-9	C00670	HMDB0000086		100	100		4.258	1.09538		0.00507487	0.0145062	0.00962422		6132690	26114430
655008	glycerophosphoserine*			POSa						100	100		19.965	1.26456		0.00507487	0.0145062	0.00962422		96386	1924353
655009	phosphoethanolamine			NEGa	1015	1071-23-4	C00346	HMDB0000224		100	100		0.173	0.852491		0.00507487	0.0145062	0.00962422		621714	107398
655010	trimethylamine N-oxide			POSa	1145	1184-78-7	C01104	HMDB0000925		100	100		1.231	1.01457		0.47117	0.580615	0.385211		351408	432702
657001	1-(1-enyl-palmitoyl)-2-arachidonoyl-GPC (P-16:0/20:4)*		Plasmalogen	POSb	24779388	84460-45-7		HMDB0011220		100	100		0.674	0.973313		0.00507487	0.0145062	0.00962422		9276845	6256102
657002	1-(1-enyl-palmitoyl)-2-arachidonoyl-GPE (P-16:0/20:4)*			POSb	52925126	97859-69-3		HMDB0011352		100	100		1.019	0.999871		1	1	0.663454		68144182	69423458
657003	1-(1-enyl-palmitoyl)-2-linoleoyl-GPC (P-16:0/18:2)*			POSb	24779386			HMDB0011211		100	100		1.144	1.00817		0.47117	0.580615	0.385211		4320839	4941759
657004	1-(1-enyl-palmitoyl)-2-linoleoyl-GPE (P-16:0/18:2)*			POSb	52925127	802981-98-2		HMDB0011343		100	100		1.027	1.00068		0.936186	0.970286	0.64374		2586006	2655955
657005	1-(1-enyl-palmitoyl)-2-oleoyl-GPC (P-16:0/18:1)*			POSb	53478675			HMDB0007996		100	100		1.047	1.00115		1	1	0.663454		34982847	36628626
657006	1-(1-enyl-palmitoyl)-2-oleoyl-GPE (P-16:0/18:1)*			POSb	52925128	65289-02-3		HMDB0011342		100	100		1.052	1.00159		1	1	0.663454		37357282	39291149
657007	1-(1-enyl-palmitoyl)-2-palmitoleoyl-GPC (P-16:0/16:1)*			POSb	52923882	204983-72-2		HMDB0011207		100	100		1.14	1.00646		0.810181	0.877463	0.582156		17941503	20455897
657008	1-(1-enyl-palmitoyl)-2-palmitoyl-GPC (P-16:0/16:0)*			POSb	11146967	126901-45-9		HMDB0011206		100	100		1.106	1.00452		1	1	0.663454		19925849	22033748
657009	1-(1-enyl-stearoyl)-2-arachidonoyl-GPE (P-18:0/20:4)*			POSb	9547058	144371-69-7	C00350	HMDB0005779		100	100		0.957	0.996502		1	1	0.663454		52442059	50187008
657010	1-(1-enyl-stearoyl)-2-linoleoyl-GPE (P-18:0/18:2)*			POSb	52925079	205648-90-4		HMDB0011376		100	100		1.182	1.0104		0.173485	0.252563	0.167564		4286581	5068807
657011	1-(1-enyl-stearoyl)-2-oleoyl-GPE (P-18:0/18:1)			POSb	42607457	144371-68-6		HMDB0011375		100	100		1.081	1.00352		0.936186	0.970286	0.64374		20167434	21796409
673001	butyrate (4:0)		Short Chain Fatty Acid	NEGa	264	107-92-6	C00246	HMDB0000039		100	67		0.568	0.943534		0.0193734	0.0414072	0.0274717		245780	139594
674003	phytosphingosine		Sphingolipid Synthesis	POSb	122121	554-62-1	C12144	HMDB0004610		100	100		2.521	1.07005		0.00507487	0.0145062	0.00962422		394370	994019
674004	sphingadienine			POSb						100	100		2.228	1.05398		0.00507487	0.0145062	0.00962422		2095983	4669065
674005	sphinganine			POSb	91486	764-22-7	C00836	HMDB0000269		100	100		3.133	1.07441		0.00507487	0.0145062	0.00962422		3414527	10698175
675001	behenoyl sphingomyelin (d18:1/22:0)*		Sphingomyelins	POSb	44260125	94359-12-3	C00550	HMDB0012103		100	100		0.648	0.973421		0.00507487	0.0145062	0.00962422		27000678	17491070
675002	hydroxypalmitoyl sphingomyelin (d18:1/16:0(OH))**			POSb						17	83		2.367	1.06484		0.00962172	0.0223081	0.0148004		74384	176095
675003	lignoceroyl sphingomyelin (d18:1/24:0)			POSb	44260127	60037-60-7		HMDB0011697		100	100		1.054	1.00175		1	1	0.663454		28537172	30088122
675004	palmitoyl sphingomyelin (d18:1/16:0)			POSb	9939941	6254-89-3		HMDB0010169		100	100		1.131	1.00506		0.810181	0.877463	0.582156		231980948	262283603
675005	sphingomyelin (d17:1/14:0, d16:1/15:0)*			POSb						100	100		1.452	1.03028		0.128205	0.198164	0.131473		157386	228590
675006	sphingomyelin (d17:1/16:0, d18:1/15:0, d16:1/17:0)*			POSb	52931139	121999-58-4		HMDB0240608		100	100		1.192	1.00975		0.378478	0.48254	0.320143		10046142	11971014
675007	sphingomyelin (d17:2/16:0, d18:2/15:0)*			POSb				HMDB0240677		0	67		NA	NA		0.07401	0.121922	0.0808894		NA	82102
675008	sphingomyelin (d18:1/14:0, d16:1/16:0)*			POSb	11433862	121999-55-1		HMDB0012097		100	100		1.262	1.01277		0.173485	0.252563	0.167564		13530409	17077323
675009	sphingomyelin (d18:1/17:0, d17:1/18:0, d19:1/16:0)			POSb		121999-64-2		HMDB0240609		100	100		0.701	0.972621		0.0453276	0.0810716	0.0537872		3241300	2271305
675010	sphingomyelin (d18:1/18:1, d18:2/18:0)			POSb	6443882	108392-10-5		HMDB0012101		100	100		0.443	0.943848		0.00507487	0.0145062	0.00962422		3217542	1425967
675012	sphingomyelin (d18:1/20:0, d16:1/22:0)*			POSb	44260124	121999-68-6	C00550	HMDB0012102		100	100		0.472	0.950602		0.00507487	0.0145062	0.00962422		6170049	2909936
675013	sphingomyelin (d18:1/20:1, d18:2/20:0)*			POSb	52931179	222403-67-0		HMDB0240610		100	100		0.4	0.926304		0.00507487	0.0145062	0.00962422		871054	348081
675015	sphingomyelin (d18:1/21:0, d17:1/22:0, d16:1/23:0)*			POSb	52931193	121999-71-1		HMDB0240611		100	100		0.393	0.934065		0.00507487	0.0145062	0.00962422		2452153	963941
675016	sphingomyelin (d18:1/22:1, d18:2/22:0, d16:1/24:1)*			POSb	52931203	222403-68-1		HMDB0012104		100	100		0.572	0.964367		0.00507487	0.0145062	0.00962422		13534186	7747082
675018	sphingomyelin (d18:1/24:1, d18:2/24:0)*			POSb	44260126	94359-13-4	C00550	HMDB0012107		100	100		0.88	0.991623		0.688921	0.778455	0.516469		76596286	67406621
675020	sphingomyelin (d18:2/14:0, d18:1/14:1)*			POSb		222403-65-8		HMDB0240612		100	100		1.419	1.02768		0.128205	0.198164	0.131473		243408	345345
675021	sphingomyelin (d18:2/16:0, d18:1/16:1)*			POSb	52931145	222403-66-9		HMDB0240613		100	100		1.373	1.01747		0.0453276	0.0810716	0.0537872		16933969	23248726
675024	sphingomyelin (d18:2/23:0, d18:1/23:1, d17:1/24:1)*			POSb		2124199-71-7		HMDB0240614		100	100		0.59	0.965271		0.00507487	0.0145062	0.00962422		8464820	4995823
675025	sphingomyelin (d18:2/23:1)*			POSb				HMDB0240668		100	50		0.449	0.923111		0.00715478	0.0202665	0.0134459		245798	110441
675026	sphingomyelin (d18:2/24:1, d18:1/24:2)*			POSb		2379393-54-9		HMDB0240615		100	100		0.782	0.983205		0.0655522	0.10856	0.0720245		12913377	10103611
675028	stearoyl sphingomyelin (d18:1/18:0)			POSb	6453725	58909-84-5		HMDB0001348		100	100		0.409	0.944247		0.00507487	0.0145062	0.00962422		16416686	6719022
675029	tricosanoyl sphingomyelin (d18:1/23:0)*			POSb	46891684	121999-74-4	C00550	HMDB0012105		100	100		0.711	0.976727		0.00823902	0.0204668	0.0135788		6377959	4532083
676002	eicosanoylsphingosine (d20:1)*		Sphingosines	POSb						100	100		2.577	1.07533		0.00507487	0.0145062	0.00962422		227703	586712
676003	heptadecasphingosine (d17:1)			POSb						100	100		2.858	1.07634		0.00507487	0.0145062	0.00962422		756602	2162170
676004	hexadecasphingosine (d16:1)*			POSb						100	100		2.819	1.07772		0.00507487	0.0145062	0.00962422		594336	1675300
676007	sphingosine			POSb	5280335	123-78-4	C00319	HMDB0000252		100	100		2.736	1.0584		0.00507487	0.0145062	0.00962422		21911905	59960326
677004	4-cholesten-3-one		Sterol	POSb	91477	601-57-0	C00599	HMDB0000921		100	100		2.385	1.07264		0.00507487	0.0145062	0.00962422		157206	374947
677011	cholesterol			POSb	5997	57-88-5	C00187	HMDB0000067		100	100		1.221	1.00908		0.575174	0.688449	0.456754		62130352	75833626
677012	cholesterol sulfate			NEGb			C18043	HMDB0000653		100	100		1.228	1.01385		0.575174	0.688449	0.456754		371531	456157
701005	(3'-5')-cytidylyladenosine	Nucleotide	Dinucleotide	NEGa						100	0		NA	NA		0.00962172	0.0223081	0.0148004		223286	NA
703005	2'-deoxyinosine		Purine Metabolism, (Hypo)Xanthine/Inosine containing	NEGa	65058	890-38-0	C05512	HMDB0000071		100	100		2.11	1.06653		0.00507487	0.0145062	0.00962422		100434	211876
703006	AICA ribonucleotide			POSa			C04677	HMDB0001517		0	100		NA	NA		0.00962172	0.0223081	0.0148004		NA	348589
703007	allantoin			NEGb	204	97-59-6	C01551	HMDB0000462		100	100		1.531	1.02796		0.0453276	0.0810716	0.0537872		1018502	1559571
703008	hypoxanthine			NEGa	790	68-94-0	C00262	HMDB0000157		100	100		0.606	0.973617		0.00507487	0.0145062	0.00962422		140893564	85433535
703009	inosine			POSa	6021	58-63-9	C00294	HMDB0000195		100	100		1.097	1.00529		0.378478	0.48254	0.320143		94294357	103404616
703010	inosine 5'-monophosphate (IMP)			POSa	8582	131-99-7	C00130	HMDB0000175		100	100		24.867	1.31153		0.00507487	0.0145062	0.00962422		615477	15305046
703013	urate			NEGa	1175	69-93-2	C00366	HMDB0000289		100	100		1.064	0.999766		0.936186	0.970286	0.64374		405212	431080
703015	xanthine			NEGb	1188	69-89-6	C00385	HMDB0000292		100	100		2.18	1.05184		0.229766	0.314735	0.208812		263169	573792
703016	xanthosine			NEGa	64959	146-80-5	C01762	HMDB0000299		100	100		0.379	0.928066		0.00507487	0.0145062	0.00962422		3253582	1234137
703017	xanthosine 5'-monophosphate (xmp)			NEGa			C00655	HMDB0001554		100	100		2.157	1.05697		0.0130652	0.0283987	0.0188412		979644	2113520
703018	1-methyladenine		Purine Metabolism, Adenine containing	POSa	78821	5142-22-3	C02216	HMDB0011599		50	17		0.311	0.913135		0.07401	0.121922	0.0808894		230155	71521
703021	2'-deoxyadenosine 5'-diphosphate			NEGa			C00206	HMDB0001508		0	100		NA	NA		0.00962172	0.0223081	0.0148004		NA	180332
703022	2'-deoxyadenosine 5'-monophosphate			NEGa	12599	653-63-4	C00360	HMDB0000905		17	100		10.581	1.21852		0.00277843	0.0145062	0.00962422		44548	471382
703024	adenine			POSa	190	73-24-5	C00147	HMDB0000034		100	100		0.781	0.986375		0.00823902	0.0204668	0.0135788		121401721	94802744
703025	adenosine			POSa	60961	58-61-7	C00212	HMDB0000050		100	100		1.848	1.03482		0.00507487	0.0145062	0.00962422		66721689	123314888
703027	adenosine 3',5'-cyclic monophosphate (cAMP)			NEGa	6076	60-92-4	C00575	HMDB0000058		100	100		1.68	1.04253		0.00507487	0.0145062	0.00962422		136747	229782
703029	3'-AMP			NEGa	41211	84-21-9	C01367	HMDB0003540		0	50		NA	NA		0.175734	0.255243	0.169342		NA	160723
703031	adenosine 5'-monophosphate (AMP)			POSa	6083	61-19-8	C00020	HMDB0000045		100	100		7.389	1.11992		0.00507487	0.0145062	0.00962422		32496175	240120055
703032	ATP			NEGa			C00002	HMDB0000538		100	100		1.181	1.0049		1	1	0.663454		14875053	17571482
703034-1	adenylosuccinate			NEGa						83	100		63.497	1.32625		0.00499812	0.0145062	0.00962422		70927	4503606
703039	N6-carbamoylthreonyladenosine			NEGa	92021849	89019-62-5		HMDB0041623		100	100		1.219	1.01475		0.173485	0.252563	0.167564		216134	263492
703041	N6-succinyladenosine			NEGa	20849086	4542-23-8		HMDB0000912		100	100		4.189	1.11651		0.00507487	0.0145062	0.00962422		135928	569426
703046	7-methylguanine		Purine Metabolism, Guanine containing	POSa	11361	578-76-7	C02242	HMDB0000897		100	100		0.453	0.933237		0.0130652	0.0283987	0.0188412		394580	178782
703048	guanine			POSa	764	73-40-5	C00242	HMDB0000132		100	100		0.326	0.942677		0.00507487	0.0145062	0.00962422		282808184	92278136
703049	guanosine			NEGa	6802	118-00-3	C00387	HMDB0000133		100	100		1.178	1.00974		0.378478	0.48254	0.320143		42335977	49875700
703052	5'- GMP			POSa	6804	85-32-5	C00144	HMDB0001397		100	100		6.288	1.12547		0.00507487	0.0145062	0.00962422		7255005	45620064
703053	guanosine 5'-diphosphate (GDP)			NEGa			C00035	HMDB0001201		100	100		2.002	1.04411		0.00823902	0.0204668	0.0135788		2566268	5136746
703054	guanosine 5'-triphosphate			NEGa			C00044	HMDB0001273		100	100		0.523	0.953226		0.00823902	0.0204668	0.0135788		4223804	2209216
702001	methylphosphate		Purine and Pyrimidine Metabolism	POSa				HMDB0061711		100	100		0.476	0.950545		0.00507487	0.0145062	0.00962422		4316440	2056467
703030	ADP		Purine metabolism	NEGa			C00008	HMDB0001341		100	100		4.839	1.09039		0.00507487	0.0145062	0.00962422		8399737	40648321
703033	adenosine-2',3'-cyclic monophosphate			NEGa			C02353	HMDB0011616		100	0		NA	NA		0.00962172	0.0223081	0.0148004		90385	NA
704004	2'-O-methylcytidine		Pyrimidine Metabolism, Cytidine containing	POSa						83	50		0.4	0.919314		0.0249921	0.050961	0.0338103		123803	49500
704005	3-methylcytidine			POSa	14237477	2140-64-9		HMDB0240577		83	0		NA	NA		0.0284407	0.0572471	0.0379808		124456	NA
704009	cytidine			POSa	6175	65-46-3	C00475	HMDB0000089		100	100		7.601	1.14016		0.00507487	0.0145062	0.00962422		2166032	16463257
704010	cytidine 2' or 3'-monophosphate (2' or 3'-CMP)			NEGa	66535	84-52-6	C05822	HMDB0240312		100	0		NA	NA		0.00962172	0.0223081	0.0148004		1312155	NA
704013	CMP			POSa	6131	63-37-6	C00055	HMDB0000095		100	100		4.452	1.09362		0.00507487	0.0145062	0.00962422		8233219	36653616
704014	cytidine diphosphate			NEGa			C00112	HMDB0001546		100	100		5.094	1.11203		0.00507487	0.0145062	0.00962422		1551998	7905731
704015	cytidine triphosphate			NEGa			C00063	HMDB0000082		100	100		0.743	0.975531		0.173485	0.252563	0.167564		3415110	2538571
704018	dihydroorotate		Pyrimidine Metabolism, Orotate containing	NEGb			C00337	HMDB0003349		83	100		12.194	1.21609		0.00499812	0.0145062	0.00962422		81443	993103
704019	N-carbamoylaspartate			NEGb	93072	13184-27-5	C00438	HMDB0000828		17	100		8.841	1.20138		0.00277843	0.0145062	0.00962422		32261	285232
704020	orotate			NEGb	967	65-86-1	C00295	HMDB0000226		100	100		12.661	1.1953		0.00507487	0.0145062	0.00962422		1426171	18057086
704021	orotidine			NEGb	92751	314-50-1	C01103	HMDB0000788		100	100		6.517	1.13417		0.00507487	0.0145062	0.00962422		932789	6079115
704022	3-aminoisobutyrate		Pyrimidine Metabolism, Thymine containing	POSa	64956	144-90-1	C05145	HMDB0003911		100	100		1.643	1.03441		0.030639	0.0579456	0.0384443		690796	1134944
704023	5,6-dihydrothymine			NEGa	676414	19140-80-8	C00906	HMDB0000079		100	100		1.037	1.00568		0.936186	0.970286	0.64374		714280	740920
704024	thymidine			NEGa	5789	50-89-5	C00214	HMDB0000273		0	100		NA	NA		0.00962172	0.0223081	0.0148004		NA	1481093
704027	thymine			NEGa	1135	65-71-4	C00178	HMDB0000262		100	100		1.122	1.0067		0.810181	0.877463	0.582156		812747	911978
704030	3-(3-amino-3-carboxypropyl)uridine*		Pyrimidine Metabolism, Uracil containing	NEGa						100	67		0.418	0.924893		0.00477182	0.0145062	0.00962422		97857	40910
704032	3-ureidopropionate			POSa		462-88-4	C02642	HMDB0000026		100	100		1.467	1.02373		0.128205	0.198164	0.131473		3325828	4877866
704034	5,6-dihydrouracil			NEGa	649	504-07-4	C00429	HMDB0000076		100	100		0.993	1.00036		0.47117	0.580615	0.385211		1368394	1358661
704035	5,6-dihydrouridine			NEGa	94312	5627-05-4		HMDB0000497		100	100		0.093	0.826787		0.00507487	0.0145062	0.00962422		1087467	101311
704036	5-methyluridine (ribothymidine)			NEGa	445408	1463-10-1		HMDB0000884		100	100		2.381	1.06624		0.00507487	0.0145062	0.00962422		564413	1343614
704037	beta-alanine			POSa	239	107-95-9	C00099	HMDB0000056		100	100		1.701	1.02849		0.00823902	0.0204668	0.0135788		70806982	120454275
704040	pseudouridine			NEGa	15047	1445-07-4	C02067	HMDB0000767		100	100		0.256	0.911978		0.00507487	0.0145062	0.00962422		3698554	946092
704041	uracil			NEGb	1174	66-22-8	C00106	HMDB0000300		100	100		0.766	0.983693		0.0655522	0.10856	0.0720245		16282775	12468203
704042	uridine			NEGa	6029	58-96-8	C00299	HMDB0000296		100	100		1.247	1.01167		0.0453276	0.0810716	0.0537872		95733786	119412289
704044	uridine 3'-monophosphate (3'-UMP)			NEGa	101543	84-53-7	C01368	HMDB0060282		100	0		NA	NA		0.00962172	0.0223081	0.0148004		708597	NA
704045	uridine 5'-diphosphate (UDP)			NEGa	6031	58-98-0	C00015	HMDB0000295		100	100		5.352	1.10637		0.00507487	0.0145062	0.00962422		4899819	26225435
704046	UMP			NEGb	6030	58-97-9	C00105	HMDB0000288		100	100		15.946	1.19693		0.00507487	0.0145062	0.00962422		1499284	23907790
704047	uridine 5'-triphosphate (UTP)			NEGa			C00075	HMDB0000285		100	100		1.273	1.01406		0.0926958	0.148789	0.0987144		8570086	10905720
704048	uridine-2',3'-cyclic monophosphate			NEGa	439715	40632-52-8	C02355	HMDB0011640		100	83		0.044	0.784053		0.00499812	0.0145062	0.00962422		4376731	194519
704011	cytidine 2',3'-cyclic monophosphate		Pyrimidine metabolism	NEGa			C00127	HMDB0011691		100	100		0.05	0.806068		0.00507487	0.0145062	0.00962422		17140920	852539
704026	TMP			NEGa	9700	365-07-1	C00364	HMDB0001227		100	100		11.228	1.20562		0.00507487	0.0145062	0.00962422		199246	2237079
107017	pyroglutamine*	Partially Characterized Molecules	Partially Characterized Molecules	POSa	11984188	29883-25-8		HMDB0062558		100	100		2.084	1.04548		0.00507487	0.0145062	0.00962422		7130819	14862818
801084	branched-chain, straight-chain, or cyclopropyl 12:1 fatty acid*			NEGa						100	100		1.053	1.0057		0.575174	0.688449	0.456754		417503	439564
901010	phenylacetylglycine	Peptide	Acetylated Peptides	NEGa	68144	500-98-1	C05598	HMDB0000821		100	100		1.649	1.03916		0.0202406	0.0414072	0.0274717		123372	203491
902009	glycylleucine		Dipeptide	POSa	92843	869-19-2	C02155	HMDB0000759		0	83		NA	NA		0.0284407	0.0572471	0.0379808		NA	103347
902010	glycylvaline			POSa	2724807	1963-21-9		HMDB0028854		100	100		1.806	1.04128		0.229766	0.314735	0.208812		127172	229714
902012	isoleucylglycine			NEGa	342532			HMDB0028907		50	100		3.117	1.10178		0.00715478	0.0202665	0.0134459		57681	179814
902013	leucylalanine			POSa	81721	7298-84-2		HMDB0028922		100	17		0.041	0.772719		0.00277843	0.0145062	0.00962422		966638	39807
902014	leucylglutamine*			POSa	4305457			HMDB0028927		100	0		NA	NA		0.00962172	0.0223081	0.0148004		153716	NA
902015	leucylglycine			POSa	79070			HMDB0028929		100	100		0.128	0.84988		0.00507487	0.0145062	0.00962422		1019567	130090
902017	phenylalanylalanine			POSa	5488196	3918-87-4		HMDB0028988		100	83		0.275	0.895218		0.00812704	0.0204668	0.0135788		300530	82524
902018	phenylalanylglycine			POSa	6992303	721-90-4		HMDB0028995		100	100		1.155	1.00645		0.810181	0.877463	0.582156		416583	481263
902021	prolylglycine			POSa	6426709	2578-57-6		HMDB0011178		100	100		1.232	1.01634		0.378478	0.48254	0.320143		867012	1068345
902026	valylglycine			POSa	6993110	686-43-1		HMDB0029127		67	67		1.768	1.05108		0.933836	0.970286	0.64374		130958	231556
902027	valylleucine			POSa	6993117	3989-97-7		HMDB0029131		100	0		NA	NA		0.00962172	0.0223081	0.0148004		287899	NA
905001	gamma-glutamyl-2-aminobutyrate		Gamma-glutamyl Amino Acid	POSa						100	100		1.274	1.01639		0.128205	0.198164	0.131473		779511	993164
905002	gamma-glutamylalanine			POSa			C03740	HMDB0006248		83	33		0.258	0.896513		0.0167114	0.0360737	0.0239332		379065	97974
905005	gamma-glutamylcysteine			POSa			C00669	HMDB0001049		100	100		2.91	1.07814		0.00507487	0.0145062	0.00962422		1743930	5075425
905006	gamma-glutamyl-epsilon-lysine			POSa	7015684	17105-15-6		HMDB0003869		100	100		0.88	0.987985		0.575174	0.688449	0.456754		440852	388100
905007	gamma-glutamylglutamate			POSa	92865	1116-22-9	C05282	HMDB0011737		100	100		0.884	0.990364		0.810181	0.877463	0.582156		2572860	2274583
905008	gamma-glutamylglutamine			POSa	150914	10148-81-9	C05283	HMDB0011738		100	100		1.476	1.03138		0.030639	0.0579456	0.0384443		102429	151205
905009	gamma-glutamylglycine			POSa	165527	1948-29-4		HMDB0011667		50	67		0.241	0.870806		0.494156	0.607744	0.40321		348179	83939
905011	gamma-glutamylisoleucine*			POSa	22885096	23632-83-9		HMDB0011170		100	100		2.597	1.08874		0.00823902	0.0204668	0.0135788		80608	209322
905012	gamma-glutamylleucine			NEGa	151023	2566-39-4		HMDB0011171		100	100		0.918	0.990233		0.688921	0.778455	0.516469		101773	93406
905013	gamma-glutamylmethionine			POSa				HMDB0034367		100	100		0.616	0.964396		0.128205	0.198164	0.131473		325697	200468
905015	gamma-glutamylserine			POSa	22844748	5875-35-4		HMDB0029158		100	100		0.722	0.967153		0.173485	0.252563	0.167564		309874	223839
905016	gamma-glutamylthreonine			POSa	53861142	5652-48-2		HMDB0029159		100	100		0.638	0.962875		0.00507487	0.0145062	0.00962422		373276	238240
905019	gamma-glutamylvaline			POSa	7015683	2746-34-1		HMDB0011172		100	100		1.21	1.01353		0.297953	0.400255	0.26555		335737	406285
906001	N,N-dimethyl-pro-pro		Modified Peptides	POSa						100	100		1.185	1.01011		0.688921	0.778455	0.516469		4149600	4916564
1102036	benzoate	Xenobiotics	Benzoate Metabolism	NEGa	243	65-85-0	C00539	HMDB0001870		100	100		1.181	1.01031		0.378478	0.48254	0.320143		860518	1016282
1102039	hippurate			NEGa	464	495-69-2	C01586	HMDB0000714		100	100		1.162	1.00754		0.688921	0.778455	0.516469		954592	1109031
1102044	p-cresol sulfate			NEGa	4615423	3233-58-7		HMDB0011635		100	100		1.435	1.02709		0.173485	0.252563	0.167564		85833	123210
1103008	2,4-di-tert-butylphenol		Chemical	NEGa						100	100		0.428	0.948606		0.00507487	0.0145062	0.00962422		19945229	8535111
1103070	phenol red			NEGa						100	100		0.613	0.967048		0.00507487	0.0145062	0.00962422		7229368	4430928
1103076	sulfate*			NEGa						100	100		1.066	1.00003		0.936186	0.970286	0.64374		2597161	2768123
1103077	thioproline			POSa	93176	34592-47-7		HMDB0062164		100	100		1.554	1.02539		0.0130652	0.0283987	0.0188412		17820327	27691662
1103080	trizma acetate			POSa	6503	77-86-1	C07182	HMDB0240288		33	0		NA	NA		NA	NA	NA		6546606	NA
1115004	salicylate		Drug - Topical Agents	NEGb	338	69-72-7	C00805	HMDB0001895		100	100		1.269	1.01699		0.173485	0.252563	0.167564		290108	368004
1116027	3-formylindole		Food Component/Plant	POSa			C08493	HMDB0029737		100	100		0.929	0.994707		0.688921	0.778455	0.516469		452354	420324
1116048	beta-guanidinopropanoate			POSa	67701		C03065	HMDB0013222		100	100		2.046	1.04797		0.00507487	0.0145062	0.00962422		1529231	3129245
1116082	ergothioneine			POSa	5351619	497-30-3	C05570	HMDB0003045		100	100		1.045	1.0026		0.688921	0.778455	0.516469		1919626	2005917
1116084	erythritol			NEGb	222285	149-32-6	C00503	HMDB0002994		100	100		1.503	1.03334		0.173485	0.252563	0.167564		80160	120507
1116103	gluconate			NEGb	10690	526-95-4	C00257	HMDB0000625		100	100		1.555	1.0339		0.0655522	0.10856	0.0720245		205169	318983
1116115	homostachydrine*			POSa	441447	472-22-0	C08283	HMDB0033433		67	83		1.335	1.01585		0.463245	0.580615	0.385211		139127	185696
1116130	mannonate*			NEGb						100	100		2.847	1.08324		0.00507487	0.0145062	0.00962422		146586	417295
1116131	methyl glucopyranoside (alpha + beta)			NEGa	445238	709-50-2		HMDB0029965		100	100		0.913	0.976341		0.688921	0.778455	0.516469		95102	86815
1116165	saccharin			NEGa	5143	81-07-2	C12283	HMDB0029723		83	83		1.532	1.03495		0.12553	0.198164	0.131473		47842	73300
1116174	stachydrine			POSa	115244	471-87-4	C10172	HMDB0004827		100	100		1.515	1.02537		0.173485	0.252563	0.167564		639654	968954
